# Supplementary material
Source: publisher figshare collection journal article supplement (https://gsajournals.figshare.com/ndownloader/files/17509637)
Supplement: Supplementary file 1 [file 17509637]

## Sheet: S1. Contig Length and Depth
Contig	Length	Coverage Depth by Illumina reads of Ph560	Heterozygosity
utg1	446775	51.8	0.003335
utg3	618689	38.03	0.0007
utg4	748451	42.78	0.001085
utg5	337685	49.13	0.002413
utg6	862870	65.21	0.004603
utg9	686719	59.31	0.00424
utg10	97562	52.8	0.002214
utg11	192726	39.64	0.001733
utg13	1347508	57.56	0.004899
utg17	871515	48.39	0.002397
utg18	927501	145.4	0.003571
utg22	578296	53.43	0.003713
utg23	455261	48.95	0.003165
utg25	405324	34.22	0.00053
utg27	1099986	58.03	0.003051
utg29	878535	56.41	0.001277
utg30	321960	44.42	0.003072
utg32	448810	57.13	0.006038
utg36	501923	34.57	0.000905
utg38	1059140	59.63	0.003035
utg41	574519	51.53	0.003979
utg42	69453	31.5	0.000158
utg43	999035	53.78	0.002491
utg44	1095872	56.45	0.005104
utg45	262179	54.92	0.004077
utg47	666084	34	0.000341
utg48	376978	55.53	0.002332
utg49	379153	45.14	0.002608
utg50	310899	49.7	0.003101
utg51	590515	41.94	0.00134
utg53	290549	46.2	0.002213
utg58	571621	54.95	0.004039
utg59	1157165	59.22	0.002537
utg60	393166	50.17	0.002856
utg62	1996536	53.42	0.003996
utg63	280580	52.6	0.000816
utg64	468869	38.17	0.000894
utg65	85298	36.46	0.000317
utg67	624415	50.06	0.00344
utg71	769525	46.09	0.001364
utg72	52207	27.12	0.00067
utg73	293910	52.36	0.002171
utg74	328645	50.99	0.00443
utg76	165339	36.83	0.000399
utg77	486376	52.99	0.0031
utg81	185702	55.9	0.00119
utg83	1467828	59.05	0.002897
utg84	982816	52.63	0.003935
utg85	556097	60.64	0.003789
utg86	1012622	50.8	0.004768
utg89	522958	54.87	0.002201
utg90	763896	53.17	0.00276
utg91	283396	38.66	0.000625
utg92	1104252	58.82	0.001813
utg97	1197957	53.17	0.001924
utg98	148862	43.48	0.001196
utg100	196830	39.44	0.00095
utg102	311259	54.41	0.004318
utg103	695061	46.39	0.002377
utg104	84808	34.11	0.000295
utg105	440489	47.15	0.003455
utg106	446884	42.06	0.001137
utg107	738964	45.24	0.002018
utg108	522748	49.35	0.001412
utg109	201848	51.24	0.00268
utg110	1040686	50.64	0.002895
utg111	916605	60.37	0.00136
utg112	388060	49.97	0.003798
utg113	65560	31.13	4.6e-05
utg114	93165	36.53	0.00102
utg115	121011	33.61	0.00014
utg116	1053250	87.39	0.001208
utg118	308124	50.13	0.001996
utg119	753293	52.95	0.002696
utg120	229539	33.91	0.000479
utg122	373619	40.2	0.002013
utg123	116149	31.64	0.000344
utg124	591707	64.15	0.003808
utg129	189557	52.4	0.004553
utg130	306354	44.92	0.001293
utg131	1026620	59.21	0.004818
utg133	398210	57.13	0.004402
utg135	333222	37.4	0.000981
utg136	1535882	45.85	0.003797
utg138	142335	44.95	0.001869
utg139	663764	198.79	0.001702
utg140	77278	26.41	0.000207
utg143	832393	47.33	0.003312
utg144	722827	55.22	0.004247
utg145	134786	36.46	0.00118
utg146	909370	55.77	0.001809
utg148	386527	56.71	0.004152
utg152	213501	33.08	0.000281
utg157	371599	45.11	0.003426
utg161	80129	28.67	0.000824
utg164	729446	74.18	0.002509
utg167	290527	65.96	0.004303
utg168	876641	57.44	0.005548
utg169	100257	46.19	0.000748
utg170	535494	34.7	0.000936
utg173	346019	51.94	0.002954
utg174	585230	56.17	0.003028
utg176	194254	42.56	0.00173
utg178	62344	28.11	0.000545
utg179	527980	50.1	0.004347
utg184	250877	47.56	0.001658
utg188	221034	39.18	0.001407
utg189	624749	50.07	0.002715
utg190	258930	55.32	0.004217
utg193	360764	53	0.004651
utg195	246136	47.87	0.003665
utg196	288296	45.46	0.001835
utg197	437897	45.36	0.001617
utg200	544634	55.24	0.001484
utg202	281415	46.1	0.001272
utg203	368268	38.65	0.001624
utg205	487536	56.56	0.004666
utg208	156287	41.26	0.000864
utg214	66082	35.36	0.000106
utg217	2083918	55.51	0.00253
utg218	662443	53.83	0.00389
utg219	358512	38.21	0.001107
utg220	175739	36.4	0.00033
utg221	226978	34.93	0.001551
utg222	590561	54.9	0.003996
utg224	260162	46.01	0.003386
utg225	619065	55.07	0.003983
utg226	83914	48.87	0.001335
utg228	274462	37.09	0.001534
utg231	230213	66.92	0.001064
utg234	259958	50.51	0.003781
utg235	558634	40.79	0.001967
utg236	37177	31.92	0.000484
utg237	193039	48.95	0.003647
utg238	336937	56.34	0.004256
utg239	90314	35.03	0.001085
utg240	174511	35.11	0.000774
utg243	454686	51.35	0.001869
utg244	1792112	52.2	0.00349
utg246	535665	57.92	0.00522
utg250	93482	39.23	0.001658
utg252	110986	44.07	0.00401
utg255	150234	32.36	0.001651
utg257	425103	37.71	0.00131
utg258	523258	41.9	0.003176
utg259	73023	31.84	0.000986
utg260	261744	43.17	0.002877
utg261	579286	43.64	0.002489
utg262	258745	54.91	0.000804
utg265	347770	37.48	0.000935
utg266	179886	34.24	0.000328
utg267	152666	41.98	0.003629
utg270	652373	44.72	0.001919
utg271	1168437	56.8	0.002695
utg273	247122	55.97	0.008749
utg274	554423	56.69	0.002092
utg275	720213	41.81	0.002162
utg276	137918	32.35	0.00079
utg280	384253	54.42	0.003893
utg281	715228	44.91	0.001511
utg282	125228	38.62	0.001358
utg283	325658	35.96	0.000703
utg284	160017	46.38	0.002862
utg288	314600	43.18	0.001046
utg292	700701	44.03	0.002712
utg295	206272	42.53	0.000722
utg299	374498	35.18	0.000539
utg300	287431	37.06	0.001096
utg302	244675	43.98	0.001917
utg306	459470	44.88	0.002956
utg307	696137	59.14	0.001184
utg308	384382	108.47	0.005867
utg309	360368	44.22	0.002991
utg310	78073	36.88	0.001588
utg314	564359	48.75	0.00284
utg315	338183	44.45	0.002664
utg319	313161	37.29	0.001858
utg322	433552	41.44	0.0008
utg324	134765	33.59	0.00066
utg325	131418	34.43	0.000289
utg326	478677	43.24	0.002918
utg327	217939	39.73	0.001822
utg328	152677	44.9	0.001873
utg329	242383	43.58	0.000759
utg334	108735	32.59	0.001048
utg338	275268	37.18	0.000469
utg340	227007	52.52	0.003973
utg341	856703	37.27	0.001117
utg345	347305	40.44	0.00106
utg347	443726	47.87	0.003133
utg351	209330	39.22	0.00236
utg352	240128	34.49	0.00055
utg354	613114	98.34	0.002357
utg355	422799	43.59	0.003704
utg360	680459	41.18	0.002107
utg364	378498	43.24	0.001453
utg366	521081	54.36	0.001261
utg367	683372	52.85	0.004254
utg368	78263	36.27	0.000486
utg369	396248	54.17	0.003422
utg372	507675	49.2	0.002807
utg373	892955	49.75	0.003043
utg375	88997	35.24	0.000472
utg379	244511	38.55	0.000736
utg388	128165	35.65	0.001685
utg389	148307	39.97	0.001382
utg390	212429	40.18	0.001064
utg393	513189	53.48	0.003843
utg397	115940	34.93	0.00094
utg399	177297	51.93	0.00145
utg401	255183	37.15	0.000913
utg402	92176	32.46	0.000738
utg403	134867	37.34	0.001275
utg405	497440	60.18	0.004764
utg409	403650	38.69	0.001338
utg410	1256560	49.58	0.001245
utg424	70495	31.7	8.5e-05
utg427	224022	35.62	0.000714
utg430	120231	33.19	0.00089
utg431	385190	56.05	0.002399
utg433	632624	47.74	0.003681
utg436	316907	50.99	0.002941
utg438	92367	32.1	0.000444
utg442	253971	58.57	0.002469
utg447	577135	45.05	0.003417
utg451	774740	48.16	0.002232
utg453	594035	47.31	0.002754
utg454	445229	51.46	0.000575
utg459	207201	33.05	0.000478
utg461	88951	37.42	0.000731
utg462	1023716	62.79	0.004643
utg465	118072	36.15	0.001067
utg469	637664	55.25	0.004865
utg470	193196	58.52	0.000631
utg471	362861	44.6	0.002152
utg474	60689	51	0.003345
utg475	417806	45.38	0.002769
utg476	227118	43.71	0.002545
utg486	359169	39.84	0.000526
utg487	208199	36.82	0.000807
utg489	724463	56.72	0.003459
utg491	361694	50.47	0.003633
utg492	440801	54.03	0.002273
utg494	211135	41.68	0.001909
utg495	121994	37.25	0.001287
utg496	483147	50.1	0.002707
utg498	245389	49.6	0.004821
utg506	160831	38.84	0.000783
utg508	286678	36.53	0.000666
utg509	193241	46.82	0.002479
utg512	544133	53.53	0.001603
utg513	274734	47.36	0.004324
utg515	216258	36.53	0.001406
utg518	226513	32.43	0.000322
utg519	263236	45.28	0.000786
utg523	284454	41.35	0.001765
utg527	57459	39.84	0.000487
utg529	613166	49.96	0.003097
utg530	364346	35.71	0.000464
utg534	368555	37.91	0.000676
utg537	570878	55.13	0.001943
utg541	60316	33.52	0.000763
utg545	123237	38.84	0.000503
utg550	424139	54.91	0.00522
utg552	665480	44.36	0.00292
utg554	66106	35.19	0.000771
utg555	890844	57.32	0.00522
utg557	281928	58.69	0.004214
utg564	302301	59.75	0.004241
utg569	945482	48.96	0.002955
utg572	97825	111.48	0.000562
utg573	326094	35.67	0.000592
utg578	465465	50.49	0.004316
utg583	288715	33.13	0.000776
utg587	476661	44.66	0.002004
utg588	64166	29.11	0.00134
utg589	187172	38.88	0.000176
utg590	138756	30.92	0.000468
utg594	276911	40.84	0.002131
utg599	50723	26.33	0.000197
utg603	104526	45.99	0.00222
utg605	179842	36.94	0.001134
utg606	37861	52.34	0.006497
utg609	240522	39.94	0.001572
utg610	444134	49.85	0.001567
utg613	79761	39.22	7.5e-05
utg617	283521	41.21	0.001266
utg619	372824	70.7	0.000845
utg624	518986	52.24	0.002495
utg630	57331	34.86	0.000523
utg631	113656	35.17	0.000818
utg632	1252311	59.35	0.002738
utg635	103039	33.39	0.000708
utg637	182623	35.19	0.000356
utg638	107781	37.45	0.000585
utg641	499159	84.02	0.005301
utg642	160216	39.36	0.00088
utg645	366785	35.53	0.000663
utg647	447275	44.35	0.002169
utg648	131916	32.91	0.0005
utg649	375957	73.58	0.001
utg652	537729	56.35	0.006847
utg653	103203	40.71	0.001705
utg654	324626	46.9	0.004433
utg655	136475	43.13	0.001422
utg658	516373	53.27	0.002169
utg665	358155	44.7	0.002303
utg666	554171	54.04	0.004753
utg667	108384	37.95	0.000185
utg669	267680	42.62	0.001961
utg673	531894	58.58	0.006037
utg677	303919	34.83	0.000392
utg679	277382	34.55	0.00172
utg680	27842	32.85	0.002802
utg686	160542	34.96	0.00038
utg688	62402	33.28	0.000529
utg689	385220	52.09	0.004548
utg691	738925	57.27	0.003517
utg694	372675	56.8	0.003392
utg695	569175	58.43	0.005496
utg698	184453	53.57	0.005877
utg701	94089	41.32	0.000393
utg702	26340	39.23	0.000152
utg703	306704	49.12	0.003609
utg705	834572	55.13	0.00426
utg710	132073	48.76	0.002544
utg712	47002	34.57	0.000191
utg713	429123	53.23	0.00488
utg715	612560	40.32	0.001959
utg716	167528	35.64	0.000442
utg721	518161	48.84	0.002519
utg728	148754	42.69	0.001929
utg730	278053	44.38	0.001773
utg736	79077	35.42	0.000341
utg737	80602	34.6	0.000285
utg742	215890	45.58	0.001001
utg746	203344	34.77	0.000418
utg749	42262	27.52	0.000166
utg755	195308	32.74	0.000599
utg757	464005	65.34	0.002325
utg759	225700	33.01	0.000877
utg764	79432	34.05	0.000478
utg765	255594	46.5	0.002774
utg766	144968	32.97	6.2e-05
utg768	805568	55.82	0.004659
utg769	209017	63.75	0.002186
utg770	63674	64.12	0.003188
utg771	68993	38.11	0.000768
utg774	195356	36.85	0.000599
utg775	40849	23.92	0
utg776	105584	54.21	0.003533
utg777	85470	47.8	0.003475
utg781	326098	96.69	0.002849
utg787	366422	54.46	0.004257
utg788	288663	37.05	0.000471
utg796	257392	35.11	0.000649
utg812	285739	34.9	0.000665
utg816	805637	53.23	0.00271
utg817	559983	47.96	0.004138
utg819	111391	34.88	0.001409
utg820	168233	39.26	0.000749
utg823	406225	53.45	0.002496
utg826	183816	43.13	0.00229
utg832	56792	39.55	0.000898
utg833	314575	39.57	0.000547
utg836	146433	31.98	0.00043
utg838	45658	31.23	0.002124
utg839	196679	34.46	0.000432
utg841	300938	52.68	0.002509
utg842	267561	38.34	0.00086
utg843	312788	36.64	0.000889
utg849	437623	52.16	0.003825
utg852	42239	31.99	7.1e-05
utg857	30367	33.59	3.3e-05
utg862	62920	46.33	0.00143
utg868	68981	33.18	0.000913
utg870	620504	54.79	0.002645
utg873	271120	33.08	0.000361
utg876	301241	145.98	0.003771
utg879	58110	33.66	0.000275
utg880	169370	32.79	0.000726
utg883	173388	48.51	0.002422
utg888	27705	24.4	0
utg890	59281	54.84	0.003644
utg891	256015	33.12	0.000293
utg894	80191	38.84	0.000162
utg896	58551	37.38	0.001247
utg902	277961	52.71	0.002061
utg906	381002	48.6	0.004373
utg908	362106	40.68	0.0029
utg909	44582	38.81	0.001368
utg910	95187	50.65	0.000746
utg911	620014	50.82	0.002373
utg914	262430	56.46	0.004268
utg918	71961	30.36	0.000181
utg919	114804	28.92	0.000662
utg925	451030	52.24	0.003355
utg927	106957	32.43	0.000505
utg933	351202	57.17	0.003055
utg937	214929	141.04	0.000814
utg938	117470	39.25	0.000298
utg939	145477	32.42	0.000543
utg942	104766	47.02	0.000974
utg946	69891	40.8	0.000258
utg950	381721	54.18	0.003882
utg953	208593	34.69	0.000686
utg960	133631	33.01	0.000831
utg964	211647	43.7	0.003577
utg967	173053	65.14	0.001832
utg969	181127	41.96	0.003158
utg971	45924	30.34	0.000653
utg972	36619	31.8	0.00041
utg973	97890	34.37	0.000204
utg976	63817	93.36	0.003212
utg979	180550	34.87	0.000892
utg981	102728	34.18	0.000321
utg982	228259	46.07	0.002983
utg985	126740	35.09	0.0003
utg993	273065	35.38	0.000872
utg1003	398244	51.72	0.004156
utg1005	460508	51.32	0.002404
utg1012	323088	44.76	0.001486
utg1014	82084	31.32	0.000439
utg1023	233875	34.21	0.000744
utg1024	52447	36.25	0.00143
utg1027	136920	64.47	0.001161
utg1028	429041	59.84	0.003135
utg1030	198340	41.47	0.001992
utg1032	701213	50.64	0.003514
utg1035	121760	36.01	0.000402
utg1037	119670	39.38	0.00132
utg1042	60232	51.73	0.000747
utg1044	121548	49.65	0.000551
utg1047	73897	48.75	0.000704
utg1052	286059	47.26	0.004076
utg1056	159330	35.15	0.000157
utg1061	69077	31.8	0.000376
utg1062	77278	33.36	0.003144
utg1066	285143	48.71	0.002998
utg1074	165118	36.71	0.000642
utg1076	131138	33.64	0.000785
utg1085	146546	35.37	0.000484
utg1086	246647	35.51	0.000892
utg1090	113020	39.88	0.002893
utg1091	168025	35.72	0.000649
utg1095	100580	30.65	0.000577
utg1098	96974	43.26	0.001722
utg1099	33453	36.67	9e-05
utg1100	506896	53.95	0.001069
utg1101	135845	32.69	0.00223
utg1103	58257	44.14	0.001099
utg1106	151515	33.13	0.000574
utg1121	92124	39.68	0.000999
utg1135	110849	34.51	0.000713
utg1145	301765	34.13	0.00065
utg1151	197749	33.62	0.000576
utg1161	72726	34.96	0.000688
utg1165	137602	32.66	0.000618
utg1168	185129	32.53	0.001475
utg1171	150466	55.11	0.004612
utg1172	67379	36.52	0.000163
utg1178	35017	64.59	0.000371
utg1181	39425	34.11	0.000685
utg1186	432791	48.57	0.002664
utg1187	158390	43.69	0.002178
utg1188	200100	31.19	0.0004
utg1191	229199	33.87	0.000109
utg1193	151005	42.46	0.003026
utg1198	59678	36.27	0.000452
utg1203	194966	36.96	0.000287
utg1205	422852	47.12	0.003413
utg1210	191792	57.86	0.001314
utg1215	179052	36.76	0.001134
utg1218	109507	35.78	0.00021
utg1222	240646	42.03	0.001616
utg1226	218035	36.39	0.000619
utg1227	455518	58.19	0.001903
utg1233	57457	26.01	0.000191
utg1236	158705	65.56	0.000397
utg1237	190941	42.85	0.001461
utg1242	47988	54.93	0.001229
utg1246	66731	39.12	0.000135
utg1252	52320	31.73	0.000248
utg1259	110778	35.61	0.000515
utg1260	344335	58.92	0.004809
utg1267	340004	35.84	0.000538
utg1268	307497	34.02	0.001463
utg1283	175478	39.31	0.000177
utg1287	254908	38.42	0.00113
utg1290	143993	33.03	0.000639
utg1306	240773	33.39	0.000349
utg1327	81733	39.73	0.000832
utg1331	138142	33.76	0.002555
utg1337	59969	1093.13	0.000767
utg1344	123630	35.94	0.000396
utg1349	298255	40.9	0.001368
utg1350	178979	32.86	0.000235
utg1351	262963	43.54	0.001875
utg1354	645363	35.78	0.000476
utg1358	363864	59.31	0.006357
utg1365	38454	32.69	0.00013
utg1367	229764	34.58	0.000466
utg1371	595061	35.83	0.000294
utg1384	312732	43.44	0.001973
utg1394	183912	48.05	0.001338
utg1401	259210	40.78	0.00189
utg1415	60254	32.3	0.000199
utg1417	56770	33.62	0.001022
utg1424	82724	35.33	0.001148
utg1425	108611	31.63	0.000368
utg1426	166359	33.52	0.000373
utg1444	43537	29.42	0.000345
utg1448	157564	34.2	0.000743
utg1461	161815	33.04	0.000105
utg1465	71618	26.67	9.8e-05
utg1466	118662	32.79	0.000935
utg1467	103606	31.27	0.000367
utg1468	459948	46.76	0.002057
utg1475	155251	33.77	0.000386
utg1476	43421	69.78	0.000184
utg1492	140297	60.22	0.004476
utg1504	294774	38.33	0.001452
utg1505	263826	69.57	0.00075
utg1512	312838	40.64	0.001438
utg1514	214761	35.12	0.00054
utg1520	57438	30.2	0.000696
utg1528	181509	40.04	0.001443
utg1529	158109	40.48	0.001271
utg1536	271670	37.38	0.000615
utg1538	232069	44.02	0.001939
utg1539	226275	39.22	0.001374
utg1542	202228	37.23	0.000826
utg1574	135904	51.34	0.005158
utg1576	292284	49.93	0.005902
utg1578	293073	54.4	0.003692
utg1583	262497	50.3	0.004423
utg1584	67935	45.33	0.000339
utg1587	58481	44.36	0.004326
utg1589	147893	47.91	0.002056
utg1592	119743	36.45	0.000944
utg1611	203763	45.45	0.004373
utg1616	185456	37.79	0.000399
utg1619	360282	39.51	0.001243
utg1642	261760	70.05	0.001906
utg1648	135471	32.6	0.000273
utg1661	109225	36.64	0.000247
utg1662	222447	32.99	0.000234
utg1666	65824	32.95	0.000349
utg1670	215833	48.04	0.003285
utg1678	238454	57.77	0.004005
utg1691	134893	35.94	0.001801
utg1692	21132	27.49	0.000142
utg1703	250713	49.08	0.003342
utg1712	215039	36.45	0.002009
utg1731	209897	824.66	0.003292
utg1746	132356	40.54	0.001904
utg1747	112530	29.09	0.000249
utg1756	97994	36.16	0.001051
utg1761	30635	38.35	0.000131
utg1769	370227	49.3	0.005005
utg1774	228073	44.09	0.002363
utg1787	352184	38.45	0.001408
utg1799	128448	43.53	0.002188
utg1811	70011	41.43	0.001028
utg1818	74756	38.31	0.000936
utg1825	106618	40.5	0.000366
utg1831	71590	32.79	0.000545
utg1842	91540	35.95	0.000776
utg1845	70505	34.48	0.000894
utg1849	330401	43.01	0.00039
utg1879	86944	37.86	0.001311
utg1904	95387	35.33	0.00108
utg1907	375795	40.68	0.00223
utg1913	491727	41.38	0.00133
utg1944	88042	34.39	0.001056
utg1960	265386	33.46	0.000901
utg1962	59699	32.2	5e-05
utg1974	310966	43.52	0.001901
utg2000	272453	47.9	0.003399
utg2006	134295	97.77	0.004684
utg2036	50610	44.6	0.001067
utg2038	233830	46.03	0.003708
utg2066	91480	39.24	0.001858
utg2070	126279	36.89	0.000269
utg2077	158174	34.88	5.1e-05
utg2079	205457	40.54	0.001888
utg2081	75528	35.43	0.000331
utg2083	73628	32.96	0.000584
utg2086	61194	33.16	0.000654
utg2088	110315	35.64	0.000508
utg2094	56522	33.76	0.000743
utg2103	200913	39.01	0.000956
utg2104	99455	40.09	0.001166
utg2115	171200	33.18	0.000864
utg2129	307758	39.4	0.001569
utg2134	94296	30.36	0.000106
utg2143	192811	47.23	0.004274
utg2167	33933	34.47	0.00053
utg2175	331348	53.4	0.004693
utg2177	51894	31.97	0.000462
utg2178	107695	40.01	0.001133
utg2189	233176	34.6	0.000652
utg2195	161319	53.39	0.002901
utg2196	74540	31.97	0.001409
utg2198	47409	36.83	0.000169
utg2205	113324	40.27	0.003088
utg2225	62791	33.93	0.000812
utg2239	161920	33.43	0.000513
utg2243	167806	38.67	0.001162
utg2284	132201	34.53	0.00025
utg2288	39701	31.75	0.000101
utg2290	252299	37.63	0.000305
utg2314	75256	33.6	0.000332
utg2333	32047	28.49	0.000156
utg2337	176956	45.86	0.002696
utg2343	58712	34.86	0.000664
utg2353	78171	43.79	0.00197
utg2355	64500	31.79	0.000512
utg2380	208251	39.57	0.002089
utg2408	135326	37.52	0.000517
utg2418	259027	43.79	0.00105
utg2428	115018	34.67	0.000391
utg2430	125164	34.41	0.00032
utg2434	108801	56.91	0.002592
utg2444	44048	31.59	0.000363
utg2445	135923	33.24	0.000831
utg2446	163994	37.41	0.000957
utg2471	41233	32.19	0.000655
utg2492	62857	32.31	0.000239
utg2500	179089	41.8	0.000983
utg2502	69393	28.88	0.000245
utg2536	102882	30.9	0.000389
utg2543	112709	47.98	0.00409
utg2546	187500	37.22	0.001525
utg2552	30686	35.9	0.000554
utg2555	257027	34.26	0.000677
utg2575	134060	35.54	0.000395
utg2589	136542	57.49	0.000601
utg2595	102772	40.62	0.001498
utg2598	241061	47.51	0.003456
utg2605	198970	40.36	0.001025
utg2608	54698	34.44	0.000878
utg2614	54733	33.73	0.001809
utg2618	23770	32.77	0.000252
utg2627	149419	38.19	0.000294
utg2635	68788	29.65	0.000102
utg2689	61590	34.2	0.000276
utg2695	83128	57.92	0.000577
utg2713	59784	33.13	0.000117
utg2714	124603	40.12	0.001437
utg2718	169020	43.78	0.002982
utg2752	81618	37.45	0.001458
utg2762	59409	33.83	0.000303
utg2776	134055	39.32	0.001052
utg2783	132979	69.18	0.003647
utg2817	157120	35.18	0.000948
utg2847	51882	42.73	0.001099
utg2848	282885	43.89	0.001425
utg2862	36360	34.27	0.000743
utg2869	49079	31.31	6.1e-05
utg2881	91680	44.94	0.001178
utg2890	52074	43.63	0.000134
utg2897	34021	29.04	0.000353
utg2905	128319	42.28	0.001644
utg2909	115183	43.58	0.000182
utg2930	45564	33.19	0.000285
utg2932	45732	45.07	0.001465
utg2938	87918	37.75	0.000546
utg2947	147841	34.35	0.00044
utg2953	96056	36.18	0.000937
utg2963	44652	27.39	0.001747
utg2969	81986	337.78	0.002317
utg2981	65188	45.7	0.000276
utg2984	129514	34.63	0.000139
utg2988	109122	32.75	9.2e-05
utg2990	104011	33.08	0.000394
utg3000	89927	45.53	0.001468
utg3028	58080	35.6	0.000207
utg3101	110098	32.47	0.000336
utg3120	67704	31.4	0.000103
utg3186	104773	34.74	0.000563
utg3233	60931	45.43	0.000886
utg3236	76433	55.36	0.002486
utg3346	57583	36.37	0.00066
utg3357	70326	35.56	0.000427
utg3360	51294	33.52	0.001228
utg3385	36133	32.15	0.000221
utg3389	53859	30.42	0.00156
utg3406	148527	33.46	0.000592
utg3431	114849	34.09	0.000244
utg3449	120854	32.59	0.000116
utg3478	125385	35.35	0.000231
utg3489	100547	31.04	0.000786
utg3501	61534	37.49	0.000406
utg3529	70000	40.8	0.001443
utg3570	150072	36.63	0.000813
utg3577	165324	36.55	0.000617
utg3584	39795	31.92	0.000829
utg3615	93972	33.89	0.000394
utg3653	113972	30.06	0.000474
utg3670	50369	28.21	2e-05
utg3719	144293	32.95	0.000236
utg3720	97798	36.15	0.000389
utg3743	23787	32.08	0.000168
utg3749	110462	36.25	0.001258
utg3775	147943	58	0.001352
utg3780	60977	34.05	0.001279
utg3818	88363	33.19	0.000724
utg3863	27305	39.66	0.000146
utg3906	50534	37.32	0.000416
utg3947	108924	34.6	0.000275
utg3963	57154	35.71	0.000892
utg3993	68947	52.6	0.00293
utg4016	23813	31.55	8.4e-05
utg4052	131508	36.6	0.001992
utg4068	100394	86.02	0.003148
utg4073	30754	25.77	0.000195
utg4122	41857	28.76	0.000406
utg4124	54701	43.96	0.00011
utg4127	103180	28.34	0.000204
utg4131	71818	44.68	0.000251
utg4143	59434	26.08	0.000185
utg4167	99310	51.83	0.000816
utg4175	106543	35.1	0.000882
utg4207	31608	39.96	0.00019
utg4214	33048	44.3	0.005265
utg4260	46833	30.49	0.000406
utg4268	117498	35.12	0.000272
utg4405	76609	34.84	0.000835
utg4477	101246	35.33	0.00077
utg4513	25370	36.82	0.000512
utg4590	55074	38.89	0.000599
utg4642	154208	41.27	0.001894
utg4644	40147	34.58	2.5e-05
utg4689	24002	19265.3	0.000125
utg4706	92807	121.39	0.001562
utg4713	58011	35.33	0.001965
utg4726	44106	40.48	0.001746
utg4727	46471	33.31	0.000323
utg4778	70500	39.31	0.001163
utg4822	26951	57.56	0.000223
utg4868	58355	29.64	0.000651
utg4889	102757	33.26	0.000321
utg4932	20948	30.22	0.000143
utg4934	45525	34.8	0.00123
utg4939	94175	172.81	0.000425
utg4950	116647	36.89	0.001303
utg4965	59118	32.88	0.00071
utg4996	99033	31.61	0.00202
utg5022	78822	42.42	0.000774
utg5049	43437	39.68	0.002671
utg5086	56526	45.95	0.00115
utg5112	75792	35.74	0.000369
utg5134	66863	68.87	0.003649
utg5146	62452	38.04	0.001041
utg5158	97684	36.72	0.00347
utg5197	94889	47.17	0.003362
utg5248	50550	31.81	0.000158
utg5367	157481	45.36	0.003378
utg5381	27380	36.82	0.001205
utg5435	52748	30.73	0.000626
utg5474	32143	45.86	0.00028
utg5513	69294	39.23	0.001429
utg5613	224689	35.52	0.000877
utg5625	134642	39.51	0.000862
utg5630	54402	34.27	0.001195
utg5669	81738	35.74	0.000661
utg5684	107074	38.21	0.000897
utg5821	90896	35.45	0.001144
utg5969	69090	34.6	0.000521
utg5980	86620	41.31	0.001281
utg5990	86047	26.17	0.0005
utg5993	78999	33.42	0.000443
utg6104	68803	33.11	0.000334
utg6186	27542	51.38	0.00138
utg6204	58821	33.43	0.000782
utg6395	162217	44.96	0.006337
utg6454	28839	35.52	0.000277
utg6543	57155	31.94	0.000175
utg6754	103847	43.71	0.000626
utg6765	30887	30.42	0.000971
utg6809	107497	37.18	0.00067
utg7115	53400	28.26	0.000206
utg7123	61488	33.79	0.000293
utg7247	45551	33.71	8.8e-05
utg7251	76146	37.69	0.003178
utg7356	109118	35.82	0.00088
utg7402	43937	36.65	0.000774
utg7516	65789	33.25	0.000866
utg7530	23348	32.18	0.001371
utg7547	40466	52.81	0.001532
utg7752	49808	39.07	0.000984
utg7769	57131	36.74	0.002345
utg7781	58389	33.41	0.00459
utg7825	28418	39.78	0.002569
utg7912	34756	38.19	0.000432
utg7939	25801	32.25	0.000116
utg7987	67205	33.75	0.002351
utg8050	108425	35.34	0.001051
utg8103	33967	33.93	0.00103
utg8237	70373	28.32	0.000256
utg8364	37009	40.07	8.1e-05
utg8660	41224	24.99	0.00017
utg8734	46475	23.82	0.000646
utg8866	31951	29.15	0.000376
utg8920	33521	32.21	6e-05
utg8927	29312	38.4	0.000478
utg9003	46765	32.99	0.000727
utg9021	47401	32.96	6.3e-05
utg9029	33732	39.64	0.000623
utg9092	30592	18.11	0.000294
utg9275	60684	32.29	0.001055
utg9370	83510	28.46	0.00097
utg9398	53821	30.21	0.000316
utg9592	93335	45.49	0.005646
utg9799	43392	59.56	0.000138
utg10141	40983	33.86	0
utg10437	75765	36.77	4e-05
utg10619	43429	32.95	0.000806
utg10745	25056	31.25	8e-05
utg10844	47570	35.46	6.3e-05
utg10858	35694	29.88	5.6e-05
utg11051	68753	32.65	0.000436
utg11336	42433	24.51	0.000118
utg11697	42568	37.82	0.000282
utg11766	48453	33.51	0.001238
utg12308	42639	36.76	0.000868
utg12429	29791	38.64	0.000336
utg12573	56472	26.28	0.000673
utg12693	37813	51.15	0.002935
utg13725	25778	37.21	0.000349
utg14227	26424	22.85	0
utg14933	42773	113.57	0
utg15585	33471	32.78	0.000657
utg16246	32200	30.36	0.000155
utg18489	33428	45.92	0.000808
utg19374	40981	27.29	0.000903
utg21751	36291	28.63	0.000468

## Sheet: S2. Functional Annotation
Unigene	Nr	Swissprot
PH560_19900-RA	OAV85547.1/1.6e-123/hypothetical protein PTTG_30442, partial [Puccinia triticina 1-1 BBBD Race 1]	sp|Q03434|YM12B_YEAST/2.3e-18/Transposon Ty1-ML2 Gag-Pol polyprotein OS=Saccharomyces cerevisiae (strain ATCC 204508 / S288c) GN=TY1B-ML2 PE=3 SV=2
PH560_19900-RB	OAV85547.1/1.5e-123/hypothetical protein PTTG_30442, partial [Puccinia triticina 1-1 BBBD Race 1]	sp|Q03434|YM12B_YEAST/2.1e-18/Transposon Ty1-ML2 Gag-Pol polyprotein OS=Saccharomyces cerevisiae (strain ATCC 204508 / S288c) GN=TY1B-ML2 PE=3 SV=2
PH560_19898-RA	KNZ51676.1/1.9e-51/hypothetical protein VP01_3866g1 [Puccinia sorghi]	NA
PH560_19901-RA	XP_003329560.2/1.6e-14/hypothetical protein PGTG_11310 [Puccinia graminis f. sp. tritici CRL 75-36-700-3]	NA
PH560_19899-RA	KNZ57884.1/9.1e-16/uncharacterized protein VP01_204g9 [Puccinia sorghi]	NA
PH560_19897-RA	KNZ58206.1/3.1e-07/hypothetical protein VP01_1976g1 [Puccinia sorghi]	NA
PH560_19906-RB	OAV85547.1/1.9e-161/hypothetical protein PTTG_30442, partial [Puccinia triticina 1-1 BBBD Race 1]	NA
PH560_19906-RA	XP_003337506.2/4.3e-102/hypothetical protein PGTG_19367 [Puccinia graminis f. sp. tritici CRL 75-36-700-3]	NA
PH560_19906-RC	OAV85547.1/1.9e-191/hypothetical protein PTTG_30442, partial [Puccinia triticina 1-1 BBBD Race 1]	NA
PH560_19902-RA	XP_003889256.1/3.9e-79/hypothetical protein PGTG_22034 [Puccinia graminis f. sp. tritici CRL 75-36-700-3]	sp|Q2HEW5|CHG2_CHAGB/3.2e-09/PKS-NRPS hybrid synthetase CHGG_01239 OS=Chaetomium globosum (strain ATCC 6205 / CBS 148.51 / DSM 1962 / NBRC 6347 / NRRL 1970) GN=CHGG_01239 PE=3 SV=1
PH560_19908-RA	KNZ52862.1/2.7e-72/hypothetical protein VP01_3423g1 [Puccinia sorghi]	NA
PH560_19903-RA	KNE88595.1/1.9e-31/hypothetical protein PSTG_17987 [Puccinia striiformis f. sp. tritici PST-78]	NA
PH560_19909-RA	KNE98634.1/3.2e-17/hypothetical protein PSTG_08003, partial [Puccinia striiformis f. sp. tritici PST-78]	NA
PH560_19907-RA	KNZ58206.1/3.1e-07/hypothetical protein VP01_1976g1 [Puccinia sorghi]	NA
PH560_19905-RA	NA	NA
PH560_17861-RB	KNZ63664.1/2.4e-100/putative retrotransposon protein, partial [Puccinia sorghi]	sp|Q03434|YM12B_YEAST/4.7e-16/Transposon Ty1-ML2 Gag-Pol polyprotein OS=Saccharomyces cerevisiae (strain ATCC 204508 / S288c) GN=TY1B-ML2 PE=3 SV=2
PH560_17861-RA	KNZ63664.1/2.5e-100/putative retrotransposon protein, partial [Puccinia sorghi]	sp|Q03434|YM12B_YEAST/1.3e-16/Transposon Ty1-ML2 Gag-Pol polyprotein OS=Saccharomyces cerevisiae (strain ATCC 204508 / S288c) GN=TY1B-ML2 PE=3 SV=2
PH560_17858-RC	KNE90582.1/1.3e-132/hypothetical protein PSTG_15975 [Puccinia striiformis f. sp. tritici PST-78]	NA
PH560_17858-RD	KNE90582.1/4.2e-140/hypothetical protein PSTG_15975 [Puccinia striiformis f. sp. tritici PST-78]	NA
PH560_17858-RB	KNE90582.1/4.0e-140/hypothetical protein PSTG_15975 [Puccinia striiformis f. sp. tritici PST-78]	NA
PH560_17858-RA	KNE90582.1/4.6e-140/hypothetical protein PSTG_15975 [Puccinia striiformis f. sp. tritici PST-78]	NA
PH560_17860-RA	XP_003070440.1/3.5e-82/copia-like retrotransposon family protein [Coccidioides posadasii C735 delta SOWgp]	sp|P0C2J7|YH41B_YEAST/2.7e-31/Transposon Ty4-H Gag-Pol polyprotein OS=Saccharomyces cerevisiae (strain ATCC 204508 / S288c) GN=TY4B-H PE=1 SV=1
PH560_17866-RC	XP_003334754.2/9.9e-212/alphaK A2 [Puccinia graminis f. sp. tritici CRL 75-36-700-3]	NA
PH560_17866-RB	XP_003334754.2/3.1e-243/alphaK A2 [Puccinia graminis f. sp. tritici CRL 75-36-700-3]	NA
PH560_17866-RF	XP_003334754.2/3.4e-223/alphaK A2 [Puccinia graminis f. sp. tritici CRL 75-36-700-3]	NA
PH560_17866-RE	XP_003334754.2/4.6e-225/alphaK A2 [Puccinia graminis f. sp. tritici CRL 75-36-700-3]	NA
PH560_17866-RG	XP_003334754.2/1.1e-153/alphaK A2 [Puccinia graminis f. sp. tritici CRL 75-36-700-3]	NA
PH560_17866-RH	XP_003334754.2/4.3e-190/alphaK A2 [Puccinia graminis f. sp. tritici CRL 75-36-700-3]	NA
PH560_17866-RA	XP_003334754.2/3.0e-219/alphaK A2 [Puccinia graminis f. sp. tritici CRL 75-36-700-3]	NA
PH560_17866-RL	XP_003334754.2/1.8e-118/alphaK A2 [Puccinia graminis f. sp. tritici CRL 75-36-700-3]	NA
PH560_17866-RM	XP_003334754.2/2.2e-93/alphaK A2 [Puccinia graminis f. sp. tritici CRL 75-36-700-3]	NA
PH560_17866-RI	OAV93066.1/4.5e-70/hypothetical protein PTTG_27469 [Puccinia triticina 1-1 BBBD Race 1]	NA
PH560_17866-RO	XP_003334754.2/6.9e-75/alphaK A2 [Puccinia graminis f. sp. tritici CRL 75-36-700-3]	NA
PH560_17866-RK	XP_003334754.2/9.1e-86/alphaK A2 [Puccinia graminis f. sp. tritici CRL 75-36-700-3]	NA
PH560_17866-RP	XP_003334754.2/1.6e-50/alphaK A2 [Puccinia graminis f. sp. tritici CRL 75-36-700-3]	NA
PH560_17866-RJ	XP_003330831.1/1.4e-71/alphaK A7 [Puccinia graminis f. sp. tritici CRL 75-36-700-3]	NA
PH560_17866-RD	XP_003334754.2/7.5e-100/alphaK A2 [Puccinia graminis f. sp. tritici CRL 75-36-700-3]	NA
PH560_17866-RN	XP_003330831.1/1.5e-42/alphaK A7 [Puccinia graminis f. sp. tritici CRL 75-36-700-3]	NA
PH560_17864-RB	XP_003336944.2/3.8e-139/hypothetical protein PGTG_18523 [Puccinia graminis f. sp. tritici CRL 75-36-700-3]	NA
PH560_17864-RC	XP_003336944.2/7.1e-131/hypothetical protein PGTG_18523 [Puccinia graminis f. sp. tritici CRL 75-36-700-3]	NA
PH560_17864-RG	KNE90990.1/6.2e-112/hypothetical protein PSTG_15593 [Puccinia striiformis f. sp. tritici PST-78]	NA
PH560_17864-RF	KNE97738.1/7.7e-115/hypothetical protein PSTG_08957 [Puccinia striiformis f. sp. tritici PST-78]	NA
PH560_17864-RD	KNE97738.1/3.4e-87/hypothetical protein PSTG_08957 [Puccinia striiformis f. sp. tritici PST-78]	NA
PH560_17864-RH	KNE90990.1/5.4e-79/hypothetical protein PSTG_15593 [Puccinia striiformis f. sp. tritici PST-78]	NA
PH560_17864-RE	KNE97738.1/2.2e-87/hypothetical protein PSTG_08957 [Puccinia striiformis f. sp. tritici PST-78]	NA
PH560_17864-RA	XP_003329069.2/2.1e-49/hypothetical protein PGTG_10809 [Puccinia graminis f. sp. tritici CRL 75-36-700-3]	NA
PH560_17855-RB	XP_003889256.1/5.7e-78/hypothetical protein PGTG_22034 [Puccinia graminis f. sp. tritici CRL 75-36-700-3]	sp|Q2HEW5|CHG2_CHAGB/9.3e-09/PKS-NRPS hybrid synthetase CHGG_01239 OS=Chaetomium globosum (strain ATCC 6205 / CBS 148.51 / DSM 1962 / NBRC 6347 / NRRL 1970) GN=CHGG_01239 PE=3 SV=1
PH560_17855-RA	KNE88595.1/9.8e-69/hypothetical protein PSTG_17987 [Puccinia striiformis f. sp. tritici PST-78]	NA
PH560_17867-RD	XP_003327423.2/8.7e-142/hypothetical protein PGTG_09972 [Puccinia graminis f. sp. tritici CRL 75-36-700-3]	NA
PH560_17867-RE	KNF02369.1/5.0e-212/hypothetical protein PSTG_04277 [Puccinia striiformis f. sp. tritici PST-78]	NA
PH560_17867-RC	KNF02369.1/5.6e-196/hypothetical protein PSTG_04277 [Puccinia striiformis f. sp. tritici PST-78]	NA
PH560_17867-RH	KNF02369.1/6.1e-148/hypothetical protein PSTG_04277 [Puccinia striiformis f. sp. tritici PST-78]	NA
PH560_17867-RG	KNF02369.1/2.9e-118/hypothetical protein PSTG_04277 [Puccinia striiformis f. sp. tritici PST-78]	NA
PH560_17867-RI	KNF02369.1/1.3e-148/hypothetical protein PSTG_04277 [Puccinia striiformis f. sp. tritici PST-78]	NA
PH560_17867-RB	KNF02369.1/5.2e-140/hypothetical protein PSTG_04277 [Puccinia striiformis f. sp. tritici PST-78]	NA
PH560_17867-RA	KNF02369.1/1.1e-137/hypothetical protein PSTG_04277 [Puccinia striiformis f. sp. tritici PST-78]	NA
PH560_17867-RF	KNF02369.1/1.0e-132/hypothetical protein PSTG_04277 [Puccinia striiformis f. sp. tritici PST-78]	NA
PH560_17865-RE	OAV94548.1/6.7e-94/hypothetical protein PTTG_09007 [Puccinia triticina 1-1 BBBD Race 1]	NA
PH560_17865-RF	OAV94548.1/1.4e-91/hypothetical protein PTTG_09007 [Puccinia triticina 1-1 BBBD Race 1]	NA
PH560_17865-RD	OAV94548.1/3.5e-60/hypothetical protein PTTG_09007 [Puccinia triticina 1-1 BBBD Race 1]	NA
PH560_17865-RC	OAV94548.1/5.2e-44/hypothetical protein PTTG_09007 [Puccinia triticina 1-1 BBBD Race 1]	NA
PH560_17865-RB	OAV94548.1/6.9e-38/hypothetical protein PTTG_09007 [Puccinia triticina 1-1 BBBD Race 1]	NA
PH560_17865-RA	OAV94548.1/2.8e-16/hypothetical protein PTTG_09007 [Puccinia triticina 1-1 BBBD Race 1]	NA
PH560_17863-RA	KNE88513.1/9.9e-63/hypothetical protein PSTG_18083, partial [Puccinia striiformis f. sp. tritici PST-78]	NA
PH560_17863-RB	KNE88513.1/9.4e-23/hypothetical protein PSTG_18083, partial [Puccinia striiformis f. sp. tritici PST-78]	NA
PH560_17869-RA	OAV86747.1/4.7e-10/hypothetical protein PTTG_09059 [Puccinia triticina 1-1 BBBD Race 1]	NA
PH560_17870-RA	KNZ57884.1/5.5e-18/uncharacterized protein VP01_204g9 [Puccinia sorghi]	NA
PH560_17859-RA	XP_003332532.2/3.6e-08/hypothetical protein PGTG_12560 [Puccinia graminis f. sp. tritici CRL 75-36-700-3]	NA
PH560_17857-RA	KNE89080.1/2.9e-28/hypothetical protein PSTG_17462 [Puccinia striiformis f. sp. tritici PST-78]	NA
PH560_17857-RB	KNE99828.1/3.0e-45/hypothetical protein PSTG_06917 [Puccinia striiformis f. sp. tritici PST-78]	NA
PH560_17862-RA	XP_003336945.1/1.1e-13/hypothetical protein PGTG_18524 [Puccinia graminis f. sp. tritici CRL 75-36-700-3]	NA
PH560_17871-RA	XP_003329560.2/2.5e-15/hypothetical protein PGTG_11310 [Puccinia graminis f. sp. tritici CRL 75-36-700-3]	NA
PH560_17856-RA	XP_003329560.2/2.5e-15/hypothetical protein PGTG_11310 [Puccinia graminis f. sp. tritici CRL 75-36-700-3]	NA
PH560_17868-RA	OAV94572.1/4.0e-10/hypothetical protein PTTG_26928 [Puccinia triticina 1-1 BBBD Race 1]	NA
PH560_17878-RE	KNZ55400.1/0.0e+00/hypothetical protein VP01_2694g2 [Puccinia sorghi]	sp|P47024|YJ41B_YEAST/1.4e-25/Transposon Ty4-J Gag-Pol polyprotein OS=Saccharomyces cerevisiae (strain ATCC 204508 / S288c) GN=TY4B-J PE=3 SV=3
PH560_17878-RC	KNZ55400.1/1.3e-206/hypothetical protein VP01_2694g2 [Puccinia sorghi]	sp|P47024|YJ41B_YEAST/4.6e-15/Transposon Ty4-J Gag-Pol polyprotein OS=Saccharomyces cerevisiae (strain ATCC 204508 / S288c) GN=TY4B-J PE=3 SV=3
PH560_17878-RF	KNZ62523.1/0.0e+00/hypothetical protein VP01_125g8 [Puccinia sorghi]	sp|Q12269|YG12B_YEAST/2.8e-27/Transposon Ty1-GR2 Gag-Pol polyprotein OS=Saccharomyces cerevisiae (strain ATCC 204508 / S288c) GN=TY1B-GR2 PE=3 SV=3
PH560_17878-RD	KNZ55400.1/1.1e-248/hypothetical protein VP01_2694g2 [Puccinia sorghi]	sp|P47024|YJ41B_YEAST/8.2e-26/Transposon Ty4-J Gag-Pol polyprotein OS=Saccharomyces cerevisiae (strain ATCC 204508 / S288c) GN=TY4B-J PE=3 SV=3
PH560_17878-RB	KNZ52020.1/1.2e-42/hypothetical protein VP01_372g8 [Puccinia sorghi]	NA
PH560_17878-RA	KNZ52020.1/6.6e-40/hypothetical protein VP01_372g8 [Puccinia sorghi]	NA
PH560_17878-RG	NA	NA
PH560_17872-RB	KNE93182.1/6.2e-230/hypothetical protein PSTG_13434 [Puccinia striiformis f. sp. tritici PST-78]	sp|O13527|YA11B_YEAST/3.5e-20/Truncated transposon Ty1-A Gag-Pol polyprotein OS=Saccharomyces cerevisiae (strain ATCC 204508 / S288c) GN=TY1B-A PE=3 SV=3
PH560_17872-RA	KNZ44439.1/1.7e-52/uncharacterized protein VP01_9168g1, partial [Puccinia sorghi]	NA
PH560_17872-RC	KNE87553.1/5.9e-52/hypothetical protein PSTG_19062 [Puccinia striiformis f. sp. tritici PST-78]	NA
PH560_17872-RD	KNE87553.1/5.6e-52/hypothetical protein PSTG_19062 [Puccinia striiformis f. sp. tritici PST-78]	NA
PH560_17872-RE	KNE87553.1/3.6e-52/hypothetical protein PSTG_19062 [Puccinia striiformis f. sp. tritici PST-78]	NA
PH560_17885-RB	OAV94607.1/1.6e-308/hypothetical protein PTTG_26936 [Puccinia triticina 1-1 BBBD Race 1]	sp|O74963|NCA2_SCHPO/4.3e-32/Nuclear control of ATPase protein 2 OS=Schizosaccharomyces pombe (strain 972 / ATCC 24843) GN=nca2 PE=3 SV=1
PH560_17885-RA	OAV94607.1/1.3e-252/hypothetical protein PTTG_26936 [Puccinia triticina 1-1 BBBD Race 1]	sp|O74963|NCA2_SCHPO/3.4e-32/Nuclear control of ATPase protein 2 OS=Schizosaccharomyces pombe (strain 972 / ATCC 24843) GN=nca2 PE=3 SV=1
PH560_17882-RA	OAV92443.1/8.0e-211/hypothetical protein PTTG_27650 [Puccinia triticina 1-1 BBBD Race 1]	NA
PH560_17882-RB	OAV89974.1/2.0e-213/hypothetical protein PTTG_28476 [Puccinia triticina 1-1 BBBD Race 1]	NA
PH560_17882-RC	OAV89974.1/4.5e-188/hypothetical protein PTTG_28476 [Puccinia triticina 1-1 BBBD Race 1]	NA
PH560_17882-RD	OAV86269.1/7.4e-171/hypothetical protein PTTG_29993, partial [Puccinia triticina 1-1 BBBD Race 1]	NA
PH560_17873-RI	OAV98668.1/4.3e-115/hypothetical protein PTTG_25616 [Puccinia triticina 1-1 BBBD Race 1]	NA
PH560_17873-RC	KNF02339.1/5.1e-97/hypothetical protein PSTG_04543 [Puccinia striiformis f. sp. tritici PST-78]	NA
PH560_17873-RB	KNE90709.1/1.9e-120/hypothetical protein PSTG_15860 [Puccinia striiformis f. sp. tritici PST-78]	NA
PH560_17873-RM	OAV98668.1/3.2e-125/hypothetical protein PTTG_25616 [Puccinia triticina 1-1 BBBD Race 1]	NA
PH560_17873-RL	KNE94873.1/4.0e-116/hypothetical protein PSTG_11777 [Puccinia striiformis f. sp. tritici PST-78]	NA
PH560_17873-RF	KNF02339.1/9.7e-99/hypothetical protein PSTG_04543 [Puccinia striiformis f. sp. tritici PST-78]	NA
PH560_17873-RH	XP_003325045.2/2.2e-95/hypothetical protein PGTG_06582 [Puccinia graminis f. sp. tritici CRL 75-36-700-3]	NA
PH560_17873-RG	OAV91779.1/1.1e-88/hypothetical protein PTTG_27879 [Puccinia triticina 1-1 BBBD Race 1]	NA
PH560_17873-RD	KNF02339.1/6.0e-84/hypothetical protein PSTG_04543 [Puccinia striiformis f. sp. tritici PST-78]	NA
PH560_17873-RJ	OAV98668.1/1.1e-112/hypothetical protein PTTG_25616 [Puccinia triticina 1-1 BBBD Race 1]	NA
PH560_17873-RE	OAV91779.1/2.6e-95/hypothetical protein PTTG_27879 [Puccinia triticina 1-1 BBBD Race 1]	NA
PH560_17873-RN	OAV98668.1/3.9e-104/hypothetical protein PTTG_25616 [Puccinia triticina 1-1 BBBD Race 1]	NA
PH560_17873-RK	OAV98668.1/2.4e-95/hypothetical protein PTTG_25616 [Puccinia triticina 1-1 BBBD Race 1]	NA
PH560_17873-RO	OAV98668.1/4.8e-78/hypothetical protein PTTG_25616 [Puccinia triticina 1-1 BBBD Race 1]	NA
PH560_17873-RA	KNE90709.1/3.8e-81/hypothetical protein PSTG_15860 [Puccinia striiformis f. sp. tritici PST-78]	NA
PH560_17884-RA	OAV94606.1/6.8e-219/hypothetical protein PTTG_03816 [Puccinia triticina 1-1 BBBD Race 1]	NA
PH560_17886-RA	OAV94378.1/7.3e-164/hypothetical protein PTTG_27007 [Puccinia triticina 1-1 BBBD Race 1]	sp|O74252|STE12_EMENI/6.1e-06/Transcription factor steA OS=Emericella nidulans (strain FGSC A4 / ATCC 38163 / CBS 112.46 / NRRL 194 / M139) GN=steA PE=2 SV=1
PH560_17889-RA	OAV98555.1/8.2e-173/hypothetical protein PTTG_01812 [Puccinia triticina 1-1 BBBD Race 1]	NA
PH560_17889-RB	OAV98555.1/2.5e-71/hypothetical protein PTTG_01812 [Puccinia triticina 1-1 BBBD Race 1]	NA
PH560_17879-RA	OAV94595.1/1.1e-198/hypothetical protein PTTG_12106 [Puccinia triticina 1-1 BBBD Race 1]	NA
PH560_17883-RC	OAV94596.1/3.7e-156/hypothetical protein PTTG_03810 [Puccinia triticina 1-1 BBBD Race 1]	sp|O13717|YDZA_SCHPO/1.0e-17/Uncharacterized protein C14C4.10c OS=Schizosaccharomyces pombe (strain 972 / ATCC 24843) GN=SPAC14C4.10c PE=4 SV=1
PH560_17883-RB	OAV94596.1/2.1e-181/hypothetical protein PTTG_03810 [Puccinia triticina 1-1 BBBD Race 1]	sp|O13717|YDZA_SCHPO/1.2e-19/Uncharacterized protein C14C4.10c OS=Schizosaccharomyces pombe (strain 972 / ATCC 24843) GN=SPAC14C4.10c PE=4 SV=1
PH560_17883-RA	OAV94596.1/4.5e-176/hypothetical protein PTTG_03810 [Puccinia triticina 1-1 BBBD Race 1]	sp|O13717|YDZA_SCHPO/1.2e-19/Uncharacterized protein C14C4.10c OS=Schizosaccharomyces pombe (strain 972 / ATCC 24843) GN=SPAC14C4.10c PE=4 SV=1
PH560_17874-RF	OAV86427.1/1.6e-143/hypothetical protein PTTG_29913, partial [Puccinia triticina 1-1 BBBD Race 1]	NA
PH560_17874-RE	OAV86427.1/1.8e-130/hypothetical protein PTTG_29913, partial [Puccinia triticina 1-1 BBBD Race 1]	NA
PH560_17874-RD	OAV86427.1/1.6e-122/hypothetical protein PTTG_29913, partial [Puccinia triticina 1-1 BBBD Race 1]	NA
PH560_17874-RC	OAV86427.1/8.8e-95/hypothetical protein PTTG_29913, partial [Puccinia triticina 1-1 BBBD Race 1]	NA
PH560_17874-RB	OAV86427.1/1.0e-78/hypothetical protein PTTG_29913, partial [Puccinia triticina 1-1 BBBD Race 1]	NA
PH560_17874-RA	XP_003888514.1/1.1e-62/hypothetical protein PGTG_22720 [Puccinia graminis f. sp. tritici CRL 75-36-700-3]	NA
PH560_17890-RB	KNE89024.1/6.2e-125/hypothetical protein PSTG_17519, partial [Puccinia striiformis f. sp. tritici PST-78]	NA
PH560_17890-RA	KNE96180.1/4.4e-123/hypothetical protein PSTG_10595 [Puccinia striiformis f. sp. tritici PST-78]	NA
PH560_17891-RB	KNF00862.1/6.0e-72/hypothetical protein PSTG_05997 [Puccinia striiformis f. sp. tritici PST-78]	NA
PH560_17891-RA	KNF00862.1/5.9e-81/hypothetical protein PSTG_05997 [Puccinia striiformis f. sp. tritici PST-78]	NA
PH560_17891-RC	KNF00862.1/5.9e-69/hypothetical protein PSTG_05997 [Puccinia striiformis f. sp. tritici PST-78]	NA
PH560_17892-RD	KNE91264.1/5.9e-56/hypothetical protein PSTG_15329 [Puccinia striiformis f. sp. tritici PST-78]	NA
PH560_17892-RC	KNE91264.1/5.9e-45/hypothetical protein PSTG_15329 [Puccinia striiformis f. sp. tritici PST-78]	NA
PH560_17892-RB	KNE91264.1/5.8e-30/hypothetical protein PSTG_15329 [Puccinia striiformis f. sp. tritici PST-78]	NA
PH560_17892-RA	KNE91264.1/4.6e-23/hypothetical protein PSTG_15329 [Puccinia striiformis f. sp. tritici PST-78]	NA
PH560_17887-RA	XP_003890266.1/6.1e-107/20S proteasome subunit beta 4 [Puccinia graminis f. sp. tritici CRL 75-36-700-3]	sp|P0CQ13|PSB4_CRYNB/2.0e-62/Probable proteasome subunit beta type-4 OS=Cryptococcus neoformans var. neoformans serotype D (strain B-3501A) GN=CPR1 PE=3 SV=1
PH560_17875-RB	OAV95094.1/8.0e-41/hypothetical protein PTTG_26756 [Puccinia triticina 1-1 BBBD Race 1]	NA
PH560_17875-RC	OAV93502.1/2.1e-38/hypothetical protein PTTG_27295 [Puccinia triticina 1-1 BBBD Race 1]	NA
PH560_17875-RA	OAV94925.1/2.8e-22/hypothetical protein PTTG_26811 [Puccinia triticina 1-1 BBBD Race 1]	NA
PH560_17875-RD	OAV96910.1/2.6e-18/hypothetical protein PTTG_26184 [Puccinia triticina 1-1 BBBD Race 1]	NA
PH560_17881-RA	XP_003888626.1/1.6e-35/hypothetical protein PGTG_22623 [Puccinia graminis f. sp. tritici CRL 75-36-700-3]	NA
PH560_17877-RA	XP_003320523.1/6.1e-66/60S ribosomal protein L26 [Puccinia graminis f. sp. tritici CRL 75-36-700-3]	sp|P53221|RL26B_YEAST/8.1e-39/60S ribosomal protein L26-B OS=Saccharomyces cerevisiae (strain ATCC 204508 / S288c) GN=RPL26B PE=1 SV=2
PH560_17877-RB	OAV88155.1/6.2e-50/hypothetical protein PTTG_06834 [Puccinia triticina 1-1 BBBD Race 1]	sp|P05743|RL26A_YEAST/3.8e-28/60S ribosomal protein L26-A OS=Saccharomyces cerevisiae (strain ATCC 204508 / S288c) GN=RPL26A PE=1 SV=3
PH560_17888-RA	KNE94517.1/6.6e-15/hypothetical protein PSTG_12163 [Puccinia striiformis f. sp. tritici PST-78]	NA
PH560_17876-RA	OAV88154.1/4.0e-42/40S ribosomal protein S21 [Puccinia triticina 1-1 BBBD Race 1]	sp|Q6CXT6|RS21_KLULA/1.0e-34/40S ribosomal protein S21 OS=Kluyveromyces lactis (strain ATCC 8585 / CBS 2359 / DSM 70799 / NBRC 1267 / NRRL Y-1140 / WM37) GN=RPS21 PE=1 SV=1
PH560_17880-RA	NA	NA
PH560_20978-RD	KNE89631.1/1.5e-191/hypothetical protein PSTG_16915, partial [Puccinia striiformis f. sp. tritici PST-78]	sp|P0CT41|TF212_SCHPO/2.4e-16/Transposon Tf2-12 polyprotein OS=Schizosaccharomyces pombe (strain 972 / ATCC 24843) GN=Tf2-12 PE=3 SV=1
PH560_20978-RE	KNE89631.1/7.1e-191/hypothetical protein PSTG_16915, partial [Puccinia striiformis f. sp. tritici PST-78]	sp|P0CT41|TF212_SCHPO/2.3e-16/Transposon Tf2-12 polyprotein OS=Schizosaccharomyces pombe (strain 972 / ATCC 24843) GN=Tf2-12 PE=3 SV=1
PH560_20978-RB	OAV94253.1/9.9e-51/hypothetical protein PTTG_27019 [Puccinia triticina 1-1 BBBD Race 1]	NA
PH560_20978-RC	OAV94253.1/7.5e-51/hypothetical protein PTTG_27019 [Puccinia triticina 1-1 BBBD Race 1]	NA
PH560_20978-RG	KNE89631.1/1.5e-190/hypothetical protein PSTG_16915, partial [Puccinia striiformis f. sp. tritici PST-78]	sp|P0CT40|TF29_SCHPO/2.2e-16/Transposon Tf2-9 polyprotein OS=Schizosaccharomyces pombe (strain 972 / ATCC 24843) GN=Tf2-9 PE=3 SV=1
PH560_20978-RA	OAV88094.1/7.0e-50/hypothetical protein PTTG_29149 [Puccinia triticina 1-1 BBBD Race 1]	NA
PH560_20978-RF	OAV89740.1/1.3e-47/hypothetical protein PTTG_06482 [Puccinia triticina 1-1 BBBD Race 1]	NA
PH560_20978-RH	OAV89740.1/2.3e-20/hypothetical protein PTTG_06482 [Puccinia triticina 1-1 BBBD Race 1]	NA
PH560_20971-RD	OAV97542.1/0.0e+00/hypothetical protein PTTG_25990 [Puccinia triticina 1-1 BBBD Race 1]	sp|P39702|VPS8_YEAST/1.8e-29/Vacuolar protein sorting-associated protein 8 OS=Saccharomyces cerevisiae (strain ATCC 204508 / S288c) GN=VPS8 PE=1 SV=2
PH560_20971-RG	OAV97542.1/0.0e+00/hypothetical protein PTTG_25990 [Puccinia triticina 1-1 BBBD Race 1]	sp|P39702|VPS8_YEAST/1.1e-34/Vacuolar protein sorting-associated protein 8 OS=Saccharomyces cerevisiae (strain ATCC 204508 / S288c) GN=VPS8 PE=1 SV=2
PH560_20971-RE	OAV97542.1/0.0e+00/hypothetical protein PTTG_25990 [Puccinia triticina 1-1 BBBD Race 1]	sp|P39702|VPS8_YEAST/8.7e-35/Vacuolar protein sorting-associated protein 8 OS=Saccharomyces cerevisiae (strain ATCC 204508 / S288c) GN=VPS8 PE=1 SV=2
PH560_20971-RF	OAV97542.1/0.0e+00/hypothetical protein PTTG_25990 [Puccinia triticina 1-1 BBBD Race 1]	sp|P39702|VPS8_YEAST/1.1e-34/Vacuolar protein sorting-associated protein 8 OS=Saccharomyces cerevisiae (strain ATCC 204508 / S288c) GN=VPS8 PE=1 SV=2
PH560_20971-RC	OAV97542.1/0.0e+00/hypothetical protein PTTG_25990 [Puccinia triticina 1-1 BBBD Race 1]	sp|P39702|VPS8_YEAST/5.0e-31/Vacuolar protein sorting-associated protein 8 OS=Saccharomyces cerevisiae (strain ATCC 204508 / S288c) GN=VPS8 PE=1 SV=2
PH560_20971-RB	OAV97542.1/0.0e+00/hypothetical protein PTTG_25990 [Puccinia triticina 1-1 BBBD Race 1]	NA
PH560_20971-RA	OAV97542.1/1.4e-117/hypothetical protein PTTG_25990 [Puccinia triticina 1-1 BBBD Race 1]	NA
PH560_20963-RB	OAV97559.1/0.0e+00/hypothetical protein PTTG_01279 [Puccinia triticina 1-1 BBBD Race 1]	sp|O74842|FFT2_SCHPO/1.1e-133/ATP-dependent helicase fft2 OS=Schizosaccharomyces pombe (strain 972 / ATCC 24843) GN=fft2 PE=1 SV=1
PH560_20963-RA	XP_003335003.2/2.3e-305/hypothetical protein PGTG_16610, partial [Puccinia graminis f. sp. tritici CRL 75-36-700-3]	sp|O74842|FFT2_SCHPO/8.6e-132/ATP-dependent helicase fft2 OS=Schizosaccharomyces pombe (strain 972 / ATCC 24843) GN=fft2 PE=1 SV=1
PH560_20963-RC	OAV97559.1/0.0e+00/hypothetical protein PTTG_01279 [Puccinia triticina 1-1 BBBD Race 1]	sp|O74842|FFT2_SCHPO/9.3e-108/ATP-dependent helicase fft2 OS=Schizosaccharomyces pombe (strain 972 / ATCC 24843) GN=fft2 PE=1 SV=1
PH560_20964-RE	KNZ63808.1/2.3e-276/hypothetical protein VP01_109g7 [Puccinia sorghi]	sp|Q99337|YN12B_YEAST/2.9e-21/Transposon Ty1-NL2 Gag-Pol polyprotein OS=Saccharomyces cerevisiae (strain ATCC 204508 / S288c) GN=TY1B-NL2 PE=3 SV=1
PH560_20964-RF	KNZ63808.1/0.0e+00/hypothetical protein VP01_109g7 [Puccinia sorghi]	sp|P0CX63|YF21B_YEAST/2.6e-23/Transposon Ty2-F Gag-Pol polyprotein OS=Saccharomyces cerevisiae (strain ATCC 204508 / S288c) GN=TY2B-F PE=3 SV=1
PH560_20964-RD	KNZ63808.1/3.7e-309/hypothetical protein VP01_109g7 [Puccinia sorghi]	sp|P0CX63|YF21B_YEAST/2.5e-23/Transposon Ty2-F Gag-Pol polyprotein OS=Saccharomyces cerevisiae (strain ATCC 204508 / S288c) GN=TY2B-F PE=3 SV=1
PH560_20964-RC	KNZ63808.1/6.4e-230/hypothetical protein VP01_109g7 [Puccinia sorghi]	sp|Q99337|YN12B_YEAST/1.5e-21/Transposon Ty1-NL2 Gag-Pol polyprotein OS=Saccharomyces cerevisiae (strain ATCC 204508 / S288c) GN=TY1B-NL2 PE=3 SV=1
PH560_20964-RB	KNZ47082.1/2.9e-119/hypothetical protein VP01_66g14 [Puccinia sorghi]	sp|Q04214|YM13B_YEAST/1.8e-17/Transposon Ty1-MR1 Gag-Pol polyprotein OS=Saccharomyces cerevisiae (strain ATCC 204508 / S288c) GN=TY1B-MR1 PE=1 SV=2
PH560_20964-RA	KNZ49243.1/1.0e-114/hypothetical protein VP01_512g7 [Puccinia sorghi]	sp|P47024|YJ41B_YEAST/8.2e-08/Transposon Ty4-J Gag-Pol polyprotein OS=Saccharomyces cerevisiae (strain ATCC 204508 / S288c) GN=TY4B-J PE=3 SV=3
PH560_20964-RG	NA	NA
PH560_20965-RA	XP_003334998.2/0.0e+00/hypothetical protein PGTG_16605 [Puccinia graminis f. sp. tritici CRL 75-36-700-3]	sp|P0CP52|PLPL_CRYNJ/1.1e-175/Patatin-like phospholipase domain-containing protein CNE02340 OS=Cryptococcus neoformans var. neoformans serotype D (strain JEC21 / ATCC MYA-565) GN=CNE02340 PE=3 SV=1
PH560_20965-RB	XP_003334998.2/0.0e+00/hypothetical protein PGTG_16605 [Puccinia graminis f. sp. tritici CRL 75-36-700-3]	sp|P0CP52|PLPL_CRYNJ/7.8e-176/Patatin-like phospholipase domain-containing protein CNE02340 OS=Cryptococcus neoformans var. neoformans serotype D (strain JEC21 / ATCC MYA-565) GN=CNE02340 PE=3 SV=1
PH560_20965-RC	XP_003334998.2/1.2e-311/hypothetical protein PGTG_16605 [Puccinia graminis f. sp. tritici CRL 75-36-700-3]	sp|P0CP52|PLPL_CRYNJ/1.3e-172/Patatin-like phospholipase domain-containing protein CNE02340 OS=Cryptococcus neoformans var. neoformans serotype D (strain JEC21 / ATCC MYA-565) GN=CNE02340 PE=3 SV=1
PH560_20965-RE	XP_003334998.2/5.3e-296/hypothetical protein PGTG_16605 [Puccinia graminis f. sp. tritici CRL 75-36-700-3]	sp|P0CP52|PLPL_CRYNJ/1.1e-170/Patatin-like phospholipase domain-containing protein CNE02340 OS=Cryptococcus neoformans var. neoformans serotype D (strain JEC21 / ATCC MYA-565) GN=CNE02340 PE=3 SV=1
PH560_20965-RF	XP_003334998.2/9.0e-241/hypothetical protein PGTG_16605 [Puccinia graminis f. sp. tritici CRL 75-36-700-3]	sp|P0CP52|PLPL_CRYNJ/6.0e-141/Patatin-like phospholipase domain-containing protein CNE02340 OS=Cryptococcus neoformans var. neoformans serotype D (strain JEC21 / ATCC MYA-565) GN=CNE02340 PE=3 SV=1
PH560_20965-RD	XP_003334998.2/1.2e-185/hypothetical protein PGTG_16605 [Puccinia graminis f. sp. tritici CRL 75-36-700-3]	sp|P0CP52|PLPL_CRYNJ/3.5e-113/Patatin-like phospholipase domain-containing protein CNE02340 OS=Cryptococcus neoformans var. neoformans serotype D (strain JEC21 / ATCC MYA-565) GN=CNE02340 PE=3 SV=1
PH560_20961-RA	OAV97563.1/0.0e+00/hypothetical protein PTTG_01277 [Puccinia triticina 1-1 BBBD Race 1]	sp|B0Y7I1|CRED_ASPFC/5.1e-20/Probable HECT-type ubiquitin ligase-interacting protein creD OS=Neosartorya fumigata (strain CEA10 / CBS 144.89 / FGSC A1163) GN=creD PE=3 SV=2
PH560_20972-RC	XP_003334987.2/0.0e+00/hypothetical protein PGTG_16594 [Puccinia graminis f. sp. tritici CRL 75-36-700-3]	sp|P0CP52|PLPL_CRYNJ/2.7e-162/Patatin-like phospholipase domain-containing protein CNE02340 OS=Cryptococcus neoformans var. neoformans serotype D (strain JEC21 / ATCC MYA-565) GN=CNE02340 PE=3 SV=1
PH560_20972-RB	XP_003334987.2/2.2e-274/hypothetical protein PGTG_16594 [Puccinia graminis f. sp. tritici CRL 75-36-700-3]	sp|P0CP52|PLPL_CRYNJ/1.7e-159/Patatin-like phospholipase domain-containing protein CNE02340 OS=Cryptococcus neoformans var. neoformans serotype D (strain JEC21 / ATCC MYA-565) GN=CNE02340 PE=3 SV=1
PH560_20972-RD	XP_003334987.2/2.9e-244/hypothetical protein PGTG_16594 [Puccinia graminis f. sp. tritici CRL 75-36-700-3]	sp|P0CP52|PLPL_CRYNJ/4.8e-111/Patatin-like phospholipase domain-containing protein CNE02340 OS=Cryptococcus neoformans var. neoformans serotype D (strain JEC21 / ATCC MYA-565) GN=CNE02340 PE=3 SV=1
PH560_20972-RA	OAV97541.1/9.9e-247/hypothetical protein PTTG_25989 [Puccinia triticina 1-1 BBBD Race 1]	sp|P0CP53|PLPL_CRYNB/9.6e-146/Patatin-like phospholipase domain-containing protein CNBE2340 OS=Cryptococcus neoformans var. neoformans serotype D (strain B-3501A) GN=CNBE2340 PE=3 SV=1
PH560_20967-RB	OAV85809.1/2.6e-184/hypothetical protein PTTG_30254, partial [Puccinia triticina 1-1 BBBD Race 1]	NA
PH560_20967-RA	OAV85809.1/2.3e-191/hypothetical protein PTTG_30254, partial [Puccinia triticina 1-1 BBBD Race 1]	NA
PH560_20967-RC	OAV85809.1/1.2e-139/hypothetical protein PTTG_30254, partial [Puccinia triticina 1-1 BBBD Race 1]	NA
PH560_20967-RE	KNZ63664.1/1.6e-31/putative retrotransposon protein, partial [Puccinia sorghi]	sp|P47024|YJ41B_YEAST/4.6e-12/Transposon Ty4-J Gag-Pol polyprotein OS=Saccharomyces cerevisiae (strain ATCC 204508 / S288c) GN=TY4B-J PE=3 SV=3
PH560_20967-RD	KNE86784.1/8.7e-55/hypothetical protein PSTG_19849, partial [Puccinia striiformis f. sp. tritici PST-78]	NA
PH560_20960-RB	XP_003331905.1/6.9e-229/hypothetical protein PGTG_13714 [Puccinia graminis f. sp. tritici CRL 75-36-700-3]	sp|Q0CMT2|CBHB_ASPTN/6.4e-139/Probable 1,4-beta-D-glucan cellobiohydrolase B OS=Aspergillus terreus (strain NIH 2624 / FGSC A1156) GN=cbhB PE=3 SV=1
PH560_20960-RF	XP_003331905.1/2.9e-165/hypothetical protein PGTG_13714 [Puccinia graminis f. sp. tritici CRL 75-36-700-3]	sp|Q0CMT2|CBHB_ASPTN/3.7e-104/Probable 1,4-beta-D-glucan cellobiohydrolase B OS=Aspergillus terreus (strain NIH 2624 / FGSC A1156) GN=cbhB PE=3 SV=1
PH560_20960-RH	XP_003331905.1/2.6e-144/hypothetical protein PGTG_13714 [Puccinia graminis f. sp. tritici CRL 75-36-700-3]	sp|Q0CMT2|CBHB_ASPTN/2.5e-91/Probable 1,4-beta-D-glucan cellobiohydrolase B OS=Aspergillus terreus (strain NIH 2624 / FGSC A1156) GN=cbhB PE=3 SV=1
PH560_20960-RA	XP_003331905.1/3.9e-230/hypothetical protein PGTG_13714 [Puccinia graminis f. sp. tritici CRL 75-36-700-3]	sp|Q0CMT2|CBHB_ASPTN/3.3e-141/Probable 1,4-beta-D-glucan cellobiohydrolase B OS=Aspergillus terreus (strain NIH 2624 / FGSC A1156) GN=cbhB PE=3 SV=1
PH560_20960-RC	XP_003331905.1/6.8e-227/hypothetical protein PGTG_13714 [Puccinia graminis f. sp. tritici CRL 75-36-700-3]	sp|Q0CMT2|CBHB_ASPTN/3.3e-141/Probable 1,4-beta-D-glucan cellobiohydrolase B OS=Aspergillus terreus (strain NIH 2624 / FGSC A1156) GN=cbhB PE=3 SV=1
PH560_20960-RE	XP_003331905.1/1.7e-166/hypothetical protein PGTG_13714 [Puccinia graminis f. sp. tritici CRL 75-36-700-3]	sp|Q0CMT2|CBHB_ASPTN/1.9e-106/Probable 1,4-beta-D-glucan cellobiohydrolase B OS=Aspergillus terreus (strain NIH 2624 / FGSC A1156) GN=cbhB PE=3 SV=1
PH560_20960-RG	XP_003331905.1/7.6e-142/hypothetical protein PGTG_13714 [Puccinia graminis f. sp. tritici CRL 75-36-700-3]	sp|Q0CMT2|CBHB_ASPTN/4.5e-91/Probable 1,4-beta-D-glucan cellobiohydrolase B OS=Aspergillus terreus (strain NIH 2624 / FGSC A1156) GN=cbhB PE=3 SV=1
PH560_20960-RD	NA	NA
PH560_20960-RK	XP_003331897.1/1.6e-88/hypothetical protein PGTG_13706 [Puccinia graminis f. sp. tritici CRL 75-36-700-3]	sp|Q4WM08|CBHB_ASPFU/6.1e-48/Probable 1,4-beta-D-glucan cellobiohydrolase B OS=Neosartorya fumigata (strain ATCC MYA-4609 / Af293 / CBS 101355 / FGSC A1100) GN=cbhB PE=1 SV=1
PH560_20960-RI	XP_003331897.1/1.2e-114/hypothetical protein PGTG_13706 [Puccinia graminis f. sp. tritici CRL 75-36-700-3]	sp|Q0CMT2|CBHB_ASPTN/5.9e-71/Probable 1,4-beta-D-glucan cellobiohydrolase B OS=Aspergillus terreus (strain NIH 2624 / FGSC A1156) GN=cbhB PE=3 SV=1
PH560_20960-RJ	XP_003331897.1/1.7e-110/hypothetical protein PGTG_13706 [Puccinia graminis f. sp. tritici CRL 75-36-700-3]	sp|Q0CMT2|CBHB_ASPTN/8.6e-67/Probable 1,4-beta-D-glucan cellobiohydrolase B OS=Aspergillus terreus (strain NIH 2624 / FGSC A1156) GN=cbhB PE=3 SV=1
PH560_20960-RL	KNE99495.1/9.2e-23/hypothetical protein PSTG_07212 [Puccinia striiformis f. sp. tritici PST-78]	sp|Q0CMT2|CBHB_ASPTN/1.5e-14/Probable 1,4-beta-D-glucan cellobiohydrolase B OS=Aspergillus terreus (strain NIH 2624 / FGSC A1156) GN=cbhB PE=3 SV=1
PH560_20979-RE	OAV89974.1/7.7e-190/hypothetical protein PTTG_28476 [Puccinia triticina 1-1 BBBD Race 1]	NA
PH560_20979-RC	OAV89974.1/1.2e-201/hypothetical protein PTTG_28476 [Puccinia triticina 1-1 BBBD Race 1]	NA
PH560_20979-RD	OAV89974.1/4.4e-196/hypothetical protein PTTG_28476 [Puccinia triticina 1-1 BBBD Race 1]	NA
PH560_20979-RB	OAV89974.1/7.6e-166/hypothetical protein PTTG_28476 [Puccinia triticina 1-1 BBBD Race 1]	NA
PH560_20979-RA	KNE96996.1/3.4e-58/hypothetical protein PSTG_09734 [Puccinia striiformis f. sp. tritici PST-78]	NA
PH560_20979-RF	OAV89974.1/1.3e-173/hypothetical protein PTTG_28476 [Puccinia triticina 1-1 BBBD Race 1]	NA
PH560_20979-RG	OAV86269.1/3.3e-168/hypothetical protein PTTG_29993, partial [Puccinia triticina 1-1 BBBD Race 1]	NA
PH560_20979-RH	OAV86269.1/7.4e-143/hypothetical protein PTTG_29993, partial [Puccinia triticina 1-1 BBBD Race 1]	NA
PH560_20976-RI	KNF05184.1/1.5e-101/hypothetical protein PSTG_01812 [Puccinia striiformis f. sp. tritici PST-78]	NA
PH560_20976-RG	KNF05184.1/5.7e-84/hypothetical protein PSTG_01812 [Puccinia striiformis f. sp. tritici PST-78]	NA
PH560_20976-RH	KNF05184.1/1.2e-75/hypothetical protein PSTG_01812 [Puccinia striiformis f. sp. tritici PST-78]	NA
PH560_20976-RE	KNF05184.1/1.9e-81/hypothetical protein PSTG_01812 [Puccinia striiformis f. sp. tritici PST-78]	NA
PH560_20976-RF	KNF05184.1/1.2e-77/hypothetical protein PSTG_01812 [Puccinia striiformis f. sp. tritici PST-78]	NA
PH560_20976-RD	OAV89973.1/3.5e-33/hypothetical protein PTTG_28475 [Puccinia triticina 1-1 BBBD Race 1]	NA
PH560_20976-RC	KNF05184.1/2.8e-58/hypothetical protein PSTG_01812 [Puccinia striiformis f. sp. tritici PST-78]	NA
PH560_20976-RM	KNF05184.1/2.8e-49/hypothetical protein PSTG_01812 [Puccinia striiformis f. sp. tritici PST-78]	NA
PH560_20976-RB	KNF05184.1/5.1e-45/hypothetical protein PSTG_01812 [Puccinia striiformis f. sp. tritici PST-78]	NA
PH560_20976-RA	KNF05184.1/3.9e-32/hypothetical protein PSTG_01812 [Puccinia striiformis f. sp. tritici PST-78]	NA
PH560_20976-RL	KNF05184.1/2.1e-24/hypothetical protein PSTG_01812 [Puccinia striiformis f. sp. tritici PST-78]	NA
PH560_20976-RK	KNF05184.1/1.2e-11/hypothetical protein PSTG_01812 [Puccinia striiformis f. sp. tritici PST-78]	NA
PH560_20968-RA	SMQ52991.1/3.4e-28/unnamed protein product [Zymoseptoria tritici ST99CH_3D7]	sp|P47024|YJ41B_YEAST/5.5e-07/Transposon Ty4-J Gag-Pol polyprotein OS=Saccharomyces cerevisiae (strain ATCC 204508 / S288c) GN=TY4B-J PE=3 SV=3
PH560_20962-RB	KNE92302.1/8.5e-44/hypothetical protein PSTG_14325 [Puccinia striiformis f. sp. tritici PST-78]	sp|Q2HEW5|CHG2_CHAGB/4.1e-19/PKS-NRPS hybrid synthetase CHGG_01239 OS=Chaetomium globosum (strain ATCC 6205 / CBS 148.51 / DSM 1962 / NBRC 6347 / NRRL 1970) GN=CHGG_01239 PE=3 SV=1
PH560_20962-RA	KNE99828.1/3.7e-54/hypothetical protein PSTG_06917 [Puccinia striiformis f. sp. tritici PST-78]	sp|Q2HEW5|CHG2_CHAGB/1.5e-23/PKS-NRPS hybrid synthetase CHGG_01239 OS=Chaetomium globosum (strain ATCC 6205 / CBS 148.51 / DSM 1962 / NBRC 6347 / NRRL 1970) GN=CHGG_01239 PE=3 SV=1
PH560_20975-RA	KNE92302.1/1.7e-47/hypothetical protein PSTG_14325 [Puccinia striiformis f. sp. tritici PST-78]	sp|Q2HEW5|CHG2_CHAGB/4.1e-19/PKS-NRPS hybrid synthetase CHGG_01239 OS=Chaetomium globosum (strain ATCC 6205 / CBS 148.51 / DSM 1962 / NBRC 6347 / NRRL 1970) GN=CHGG_01239 PE=3 SV=1
PH560_20975-RB	KNE92302.1/5.0e-59/hypothetical protein PSTG_14325 [Puccinia striiformis f. sp. tritici PST-78]	sp|Q2HEW5|CHG2_CHAGB/5.6e-23/PKS-NRPS hybrid synthetase CHGG_01239 OS=Chaetomium globosum (strain ATCC 6205 / CBS 148.51 / DSM 1962 / NBRC 6347 / NRRL 1970) GN=CHGG_01239 PE=3 SV=1
PH560_20969-RA	KNE99480.1/2.9e-73/hypothetical protein PSTG_07198 [Puccinia striiformis f. sp. tritici PST-78]	NA
PH560_20969-RC	KNE99480.1/2.8e-73/hypothetical protein PSTG_07198 [Puccinia striiformis f. sp. tritici PST-78]	NA
PH560_20969-RB	KNE99480.1/3.3e-62/hypothetical protein PSTG_07198 [Puccinia striiformis f. sp. tritici PST-78]	NA
PH560_20969-RD	KNE99480.1/2.8e-61/hypothetical protein PSTG_07198 [Puccinia striiformis f. sp. tritici PST-78]	NA
PH560_20969-RF	OAV97544.1/1.9e-65/hypothetical protein PTTG_01286 [Puccinia triticina 1-1 BBBD Race 1]	NA
PH560_20969-RE	OAV97544.1/1.1e-41/hypothetical protein PTTG_01286 [Puccinia triticina 1-1 BBBD Race 1]	NA
PH560_20970-RA	OAV97547.1/6.4e-36/hypothetical protein PTTG_25992 [Puccinia triticina 1-1 BBBD Race 1]	NA
PH560_20966-RA	XP_003330843.2/8.5e-51/hypothetical protein PGTG_12380 [Puccinia graminis f. sp. tritici CRL 75-36-700-3]	NA
PH560_20966-RB	XP_003330845.1/9.8e-19/hypothetical protein PGTG_12382 [Puccinia graminis f. sp. tritici CRL 75-36-700-3]	NA
PH560_20973-RD	OAV96704.1/2.7e-38/hypothetical protein PTTG_02913 [Puccinia triticina 1-1 BBBD Race 1]	NA
PH560_20973-RB	OAV94317.1/1.2e-27/hypothetical protein PTTG_26989 [Puccinia triticina 1-1 BBBD Race 1]	NA
PH560_20973-RC	OAV94317.1/5.1e-23/hypothetical protein PTTG_26989 [Puccinia triticina 1-1 BBBD Race 1]	NA
PH560_20973-RA	OAV86535.1/1.3e-12/hypothetical protein PTTG_29848, partial [Puccinia triticina 1-1 BBBD Race 1]	NA
PH560_20973-RE	NA	NA
PH560_20974-RA	XP_003888471.1/2.5e-29/hypothetical protein PGTG_22786 [Puccinia graminis f. sp. tritici CRL 75-36-700-3]	NA
PH560_20974-RB	NA	NA
PH560_20977-RA	XP_003329560.2/3.1e-13/hypothetical protein PGTG_11310 [Puccinia graminis f. sp. tritici CRL 75-36-700-3]	NA
PH560_24830-RB	XP_003323198.2/6.1e-258/hypothetical protein PGTG_04735 [Puccinia graminis f. sp. tritici CRL 75-36-700-3]	NA
PH560_24830-RC	OAV98614.1/1.9e-71/hypothetical protein PTTG_12650 [Puccinia triticina 1-1 BBBD Race 1]	NA
PH560_24830-RA	KNE93059.1/1.1e-38/hypothetical protein PSTG_13551 [Puccinia striiformis f. sp. tritici PST-78]	NA
PH560_24827-RA	OAV98612.1/4.3e-245/hypothetical protein, variant [Puccinia triticina 1-1 BBBD Race 1]	sp|Q03104|MSC1_YEAST/6.3e-07/Meiotic sister chromatid recombination protein 1 OS=Saccharomyces cerevisiae (strain ATCC 204508 / S288c) GN=MSC1 PE=1 SV=1
PH560_24827-RB	OAV98612.1/6.0e-98/hypothetical protein, variant [Puccinia triticina 1-1 BBBD Race 1]	NA
PH560_24829-RA	KNZ57884.1/1.2e-49/uncharacterized protein VP01_204g9 [Puccinia sorghi]	NA
PH560_24828-RA	KNE91869.1/6.6e-12/hypothetical protein PSTG_14723 [Puccinia striiformis f. sp. tritici PST-78]	NA
PH560_25385-RC	KNF04192.1/6.0e-151/hypothetical protein PSTG_02544 [Puccinia striiformis f. sp. tritici PST-78]	NA
PH560_25385-RB	KNF04192.1/6.6e-108/hypothetical protein PSTG_02544 [Puccinia striiformis f. sp. tritici PST-78]	NA
PH560_25385-RA	KNF04192.1/4.7e-92/hypothetical protein PSTG_02544 [Puccinia striiformis f. sp. tritici PST-78]	NA
PH560_25388-RC	XP_003337909.2/2.1e-160/hypothetical protein PGTG_19466 [Puccinia graminis f. sp. tritici CRL 75-36-700-3]	NA
PH560_25388-RB	XP_003337909.2/1.5e-104/hypothetical protein PGTG_19466 [Puccinia graminis f. sp. tritici CRL 75-36-700-3]	NA
PH560_25388-RA	XP_003337909.2/4.5e-88/hypothetical protein PGTG_19466 [Puccinia graminis f. sp. tritici CRL 75-36-700-3]	NA
PH560_25387-RA	KNE88595.1/3.5e-73/hypothetical protein PSTG_17987 [Puccinia striiformis f. sp. tritici PST-78]	NA
PH560_25386-RB	KNZ57680.1/6.2e-39/hypothetical protein VP01_2100g2 [Puccinia sorghi]	NA
PH560_25386-RA	XP_003336633.1/2.3e-30/hypothetical protein PGTG_18111 [Puccinia graminis f. sp. tritici CRL 75-36-700-3]	NA
PH560_02635-RC	KNZ63664.1/1.5e-78/putative retrotransposon protein, partial [Puccinia sorghi]	sp|Q12113|YO21B_YEAST/4.8e-13/Transposon Ty2-OR1 Gag-Pol polyprotein OS=Saccharomyces cerevisiae (strain ATCC 204508 / S288c) GN=TY2B-OR1 PE=3 SV=1
PH560_02635-RB	KNZ63664.1/1.5e-78/putative retrotransposon protein, partial [Puccinia sorghi]	sp|Q12113|YO21B_YEAST/4.9e-13/Transposon Ty2-OR1 Gag-Pol polyprotein OS=Saccharomyces cerevisiae (strain ATCC 204508 / S288c) GN=TY2B-OR1 PE=3 SV=1
PH560_02635-RE	KNZ63664.1/3.7e-95/putative retrotransposon protein, partial [Puccinia sorghi]	sp|Q12337|YG21B_YEAST/1.5e-16/Transposon Ty2-GR1 Gag-Pol polyprotein OS=Saccharomyces cerevisiae (strain ATCC 204508 / S288c) GN=TY2B-GR1 PE=5 SV=2
PH560_02635-RA	KNZ63664.1/4.2e-95/putative retrotransposon protein, partial [Puccinia sorghi]	sp|P0C2J5|YL22B_YEAST/5.2e-18/Transposon Ty2-LR2 Gag-Pol polyprotein OS=Saccharomyces cerevisiae (strain ATCC 204508 / S288c) GN=TY2B-LR2 PE=5 SV=1
PH560_02635-RD	KNZ63664.1/4.0e-95/putative retrotransposon protein, partial [Puccinia sorghi]	sp|P0C2J5|YL22B_YEAST/5.0e-18/Transposon Ty2-LR2 Gag-Pol polyprotein OS=Saccharomyces cerevisiae (strain ATCC 204508 / S288c) GN=TY2B-LR2 PE=5 SV=1
PH560_02635-RF	KNZ63664.1/3.3e-95/putative retrotransposon protein, partial [Puccinia sorghi]	sp|P0C2J5|YL22B_YEAST/4.2e-18/Transposon Ty2-LR2 Gag-Pol polyprotein OS=Saccharomyces cerevisiae (strain ATCC 204508 / S288c) GN=TY2B-LR2 PE=5 SV=1
PH560_02635-RG	KNZ63664.1/2.4e-95/putative retrotransposon protein, partial [Puccinia sorghi]	sp|Q12113|YO21B_YEAST/3.0e-18/Transposon Ty2-OR1 Gag-Pol polyprotein OS=Saccharomyces cerevisiae (strain ATCC 204508 / S288c) GN=TY2B-OR1 PE=3 SV=1
PH560_02625-RA	KNE96180.1/2.4e-142/hypothetical protein PSTG_10595 [Puccinia striiformis f. sp. tritici PST-78]	NA
PH560_02625-RB	KNE96180.1/1.6e-143/hypothetical protein PSTG_10595 [Puccinia striiformis f. sp. tritici PST-78]	NA
PH560_02625-RC	KNE89024.1/6.2e-125/hypothetical protein PSTG_17519, partial [Puccinia striiformis f. sp. tritici PST-78]	NA
PH560_02631-RA	OAV97041.1/3.8e-129/hypothetical protein PTTG_06433 [Puccinia triticina 1-1 BBBD Race 1]	sp|P25044|PTP1_YEAST/2.0e-18/Tyrosine-protein phosphatase 1 OS=Saccharomyces cerevisiae (strain ATCC 204508 / S288c) GN=PTP1 PE=1 SV=1
PH560_02631-RB	OAV97041.1/2.8e-129/hypothetical protein PTTG_06433 [Puccinia triticina 1-1 BBBD Race 1]	sp|P25044|PTP1_YEAST/1.1e-16/Tyrosine-protein phosphatase 1 OS=Saccharomyces cerevisiae (strain ATCC 204508 / S288c) GN=PTP1 PE=1 SV=1
PH560_02631-RC	NA	NA
PH560_02632-RA	OAV96459.1/2.2e-96/hypothetical protein PTTG_26304 [Puccinia triticina 1-1 BBBD Race 1]	NA
PH560_02626-RB	OAV85061.1/3.9e-54/hypothetical protein PTTG_30826, partial [Puccinia triticina 1-1 BBBD Race 1]	NA
PH560_02626-RA	OAV85061.1/2.7e-72/hypothetical protein PTTG_30826, partial [Puccinia triticina 1-1 BBBD Race 1]	NA
PH560_02623-RA	KNE88595.1/5.2e-67/hypothetical protein PSTG_17987 [Puccinia striiformis f. sp. tritici PST-78]	NA
PH560_02628-RC	KNE91264.1/4.1e-42/hypothetical protein PSTG_15329 [Puccinia striiformis f. sp. tritici PST-78]	NA
PH560_02628-RB	KNE91264.1/2.3e-43/hypothetical protein PSTG_15329 [Puccinia striiformis f. sp. tritici PST-78]	NA
PH560_02628-RA	KNZ45985.1/5.0e-30/hypothetical protein VP01_7648g2 [Puccinia sorghi]	NA
PH560_02629-RC	KNE91264.1/2.4e-59/hypothetical protein PSTG_15329 [Puccinia striiformis f. sp. tritici PST-78]	NA
PH560_02629-RB	KNE91264.1/1.6e-31/hypothetical protein PSTG_15329 [Puccinia striiformis f. sp. tritici PST-78]	NA
PH560_02629-RA	KNE91264.1/1.8e-23/hypothetical protein PSTG_15329 [Puccinia striiformis f. sp. tritici PST-78]	NA
PH560_02634-RA	OAV97043.1/2.3e-84/hypothetical protein PTTG_06434 [Puccinia triticina 1-1 BBBD Race 1]	NA
PH560_02634-RB	OAV97043.1/7.3e-68/hypothetical protein PTTG_06434 [Puccinia triticina 1-1 BBBD Race 1]	NA
PH560_02633-RA	OAV96459.1/3.8e-22/hypothetical protein PTTG_26304 [Puccinia triticina 1-1 BBBD Race 1]	NA
PH560_02627-RA	NA	NA
PH560_02630-RA	KNZ59007.1/8.6e-15/hypothetical protein VP01_1818g1 [Puccinia sorghi]	NA
PH560_02624-RA	XP_003329560.2/2.1e-14/hypothetical protein PGTG_11310 [Puccinia graminis f. sp. tritici CRL 75-36-700-3]	NA
PH560_02636-RA	KDR75264.1/3.7e-96/hypothetical protein GALMADRAFT_24757, partial [Galerina marginata CBS 339.88]	sp|P47024|YJ41B_YEAST/5.3e-31/Transposon Ty4-J Gag-Pol polyprotein OS=Saccharomyces cerevisiae (strain ATCC 204508 / S288c) GN=TY4B-J PE=3 SV=3
PH560_02649-RA	OAV97034.1/9.7e-174/hypothetical protein PTTG_26133 [Puccinia triticina 1-1 BBBD Race 1]	NA
PH560_02649-RB	XP_003889602.1/5.1e-16/hypothetical protein PGTG_21710 [Puccinia graminis f. sp. tritici CRL 75-36-700-3]	NA
PH560_02644-RA	XP_003889256.1/8.4e-78/hypothetical protein PGTG_22034 [Puccinia graminis f. sp. tritici CRL 75-36-700-3]	sp|Q2HEW5|CHG2_CHAGB/1.5e-07/PKS-NRPS hybrid synthetase CHGG_01239 OS=Chaetomium globosum (strain ATCC 6205 / CBS 148.51 / DSM 1962 / NBRC 6347 / NRRL 1970) GN=CHGG_01239 PE=3 SV=1
PH560_02646-RA	XP_003329040.2/1.9e-174/hypothetical protein PGTG_10780 [Puccinia graminis f. sp. tritici CRL 75-36-700-3]	sp|Q9USH7|PSY1_SCHPO/6.0e-32/Syntaxin-like protein psy1 OS=Schizosaccharomyces pombe (strain 972 / ATCC 24843) GN=psy1 PE=3 SV=1
PH560_02646-RB	XP_003329040.2/1.2e-184/hypothetical protein PGTG_10780 [Puccinia graminis f. sp. tritici CRL 75-36-700-3]	sp|Q9USH7|PSY1_SCHPO/6.3e-32/Syntaxin-like protein psy1 OS=Schizosaccharomyces pombe (strain 972 / ATCC 24843) GN=psy1 PE=3 SV=1
PH560_02646-RC	KNE96856.1/7.6e-92/hypothetical protein PSTG_09840 [Puccinia striiformis f. sp. tritici PST-78]	sp|Q9USH7|PSY1_SCHPO/3.5e-25/Syntaxin-like protein psy1 OS=Schizosaccharomyces pombe (strain 972 / ATCC 24843) GN=psy1 PE=3 SV=1
PH560_02646-RD	XP_003329040.2/1.4e-57/hypothetical protein PGTG_10780 [Puccinia graminis f. sp. tritici CRL 75-36-700-3]	sp|Q9USH7|PSY1_SCHPO/5.9e-08/Syntaxin-like protein psy1 OS=Schizosaccharomyces pombe (strain 972 / ATCC 24843) GN=psy1 PE=3 SV=1
PH560_02642-RB	KNE96180.1/1.3e-148/hypothetical protein PSTG_10595 [Puccinia striiformis f. sp. tritici PST-78]	NA
PH560_02642-RC	KNE96180.1/6.9e-150/hypothetical protein PSTG_10595 [Puccinia striiformis f. sp. tritici PST-78]	NA
PH560_02642-RA	KNE89024.1/4.1e-129/hypothetical protein PSTG_17519, partial [Puccinia striiformis f. sp. tritici PST-78]	NA
PH560_02642-RE	KNE96180.1/8.5e-76/hypothetical protein PSTG_10595 [Puccinia striiformis f. sp. tritici PST-78]	NA
PH560_02642-RD	KNE91263.1/3.6e-59/hypothetical protein PSTG_15328 [Puccinia striiformis f. sp. tritici PST-78]	NA
PH560_02648-RB	KNZ47082.1/8.0e-169/hypothetical protein VP01_66g14 [Puccinia sorghi]	sp|Q99337|YN12B_YEAST/4.1e-16/Transposon Ty1-NL2 Gag-Pol polyprotein OS=Saccharomyces cerevisiae (strain ATCC 204508 / S288c) GN=TY1B-NL2 PE=3 SV=1
PH560_02648-RA	KNZ60563.1/1.6e-194/hypothetical protein VP01_1536g6 [Puccinia sorghi]	sp|P47024|YJ41B_YEAST/2.4e-25/Transposon Ty4-J Gag-Pol polyprotein OS=Saccharomyces cerevisiae (strain ATCC 204508 / S288c) GN=TY4B-J PE=3 SV=3
PH560_02648-RC	KNZ49317.1/2.3e-131/hypothetical protein VP01_508g2 [Puccinia sorghi]	sp|P47024|YJ41B_YEAST/4.9e-09/Transposon Ty4-J Gag-Pol polyprotein OS=Saccharomyces cerevisiae (strain ATCC 204508 / S288c) GN=TY4B-J PE=3 SV=3
PH560_02648-RD	KNZ49317.1/4.4e-106/hypothetical protein VP01_508g2 [Puccinia sorghi]	sp|P47024|YJ41B_YEAST/2.7e-07/Transposon Ty4-J Gag-Pol polyprotein OS=Saccharomyces cerevisiae (strain ATCC 204508 / S288c) GN=TY4B-J PE=3 SV=3
PH560_02637-RA	KNE93182.1/1.1e-45/hypothetical protein PSTG_13434 [Puccinia striiformis f. sp. tritici PST-78]	sp|Q12337|YG21B_YEAST/9.2e-13/Transposon Ty2-GR1 Gag-Pol polyprotein OS=Saccharomyces cerevisiae (strain ATCC 204508 / S288c) GN=TY2B-GR1 PE=5 SV=2
PH560_02641-RA	KNF06644.1/2.1e-92/hypothetical protein PSTG_00518 [Puccinia striiformis f. sp. tritici PST-78]	NA
PH560_02641-RB	KNF06644.1/6.2e-103/hypothetical protein PSTG_00518 [Puccinia striiformis f. sp. tritici PST-78]	NA
PH560_02639-RB	OAV97041.1/1.2e-132/hypothetical protein PTTG_06433 [Puccinia triticina 1-1 BBBD Race 1]	sp|P25044|PTP1_YEAST/1.2e-20/Tyrosine-protein phosphatase 1 OS=Saccharomyces cerevisiae (strain ATCC 204508 / S288c) GN=PTP1 PE=1 SV=1
PH560_02639-RA	OAV97041.1/6.6e-133/hypothetical protein PTTG_06433 [Puccinia triticina 1-1 BBBD Race 1]	sp|P25044|PTP1_YEAST/8.1e-19/Tyrosine-protein phosphatase 1 OS=Saccharomyces cerevisiae (strain ATCC 204508 / S288c) GN=PTP1 PE=1 SV=1
PH560_02639-RC	NA	NA
PH560_02653-RA	OAV91296.1/1.9e-128/hypothetical protein PTTG_12416 [Puccinia triticina 1-1 BBBD Race 1]	NA
PH560_02647-RC	KNZ47082.1/3.1e-83/hypothetical protein VP01_66g14 [Puccinia sorghi]	sp|P0C2J1|YP14B_YEAST/3.4e-10/Transposon Ty1-PR3 Gag-Pol polyprotein OS=Saccharomyces cerevisiae (strain ATCC 204508 / S288c) GN=TY1B-PR3 PE=1 SV=1
PH560_02647-RB	KNZ46099.1/1.2e-176/hypothetical protein VP01_755g6 [Puccinia sorghi]	sp|P0C2J5|YL22B_YEAST/5.9e-19/Transposon Ty2-LR2 Gag-Pol polyprotein OS=Saccharomyces cerevisiae (strain ATCC 204508 / S288c) GN=TY2B-LR2 PE=5 SV=1
PH560_02647-RD	KNZ47082.1/1.4e-128/hypothetical protein VP01_66g14 [Puccinia sorghi]	sp|P0C2J5|YL22B_YEAST/1.1e-16/Transposon Ty2-LR2 Gag-Pol polyprotein OS=Saccharomyces cerevisiae (strain ATCC 204508 / S288c) GN=TY2B-LR2 PE=5 SV=1
PH560_02647-RA	KNZ47082.1/0.0e+00/hypothetical protein VP01_66g14 [Puccinia sorghi]	sp|P0C2J5|YL22B_YEAST/1.4e-23/Transposon Ty2-LR2 Gag-Pol polyprotein OS=Saccharomyces cerevisiae (strain ATCC 204508 / S288c) GN=TY2B-LR2 PE=5 SV=1
PH560_02650-RA	OAV97032.1/3.2e-105/hypothetical protein PTTG_06422 [Puccinia triticina 1-1 BBBD Race 1]	sp|P0CQ27|ATP23_CRYNB/2.3e-47/Mitochondrial inner membrane protease ATP23 OS=Cryptococcus neoformans var. neoformans serotype D (strain B-3501A) GN=ATP23 PE=3 SV=1
PH560_02652-RB	KNE91264.1/2.2e-49/hypothetical protein PSTG_15329 [Puccinia striiformis f. sp. tritici PST-78]	NA
PH560_02652-RA	KNE91264.1/2.6e-59/hypothetical protein PSTG_15329 [Puccinia striiformis f. sp. tritici PST-78]	NA
PH560_02652-RC	KNE91264.1/1.8e-31/hypothetical protein PSTG_15329 [Puccinia striiformis f. sp. tritici PST-78]	NA
PH560_02652-RD	KNE91264.1/2.7e-23/hypothetical protein PSTG_15329 [Puccinia striiformis f. sp. tritici PST-78]	NA
PH560_02640-RG	KNE91264.1/3.3e-45/hypothetical protein PSTG_15329 [Puccinia striiformis f. sp. tritici PST-78]	NA
PH560_02640-RB	KNE91264.1/1.7e-78/hypothetical protein PSTG_15329 [Puccinia striiformis f. sp. tritici PST-78]	NA
PH560_02640-RF	KNE91264.1/3.5e-45/hypothetical protein PSTG_15329 [Puccinia striiformis f. sp. tritici PST-78]	NA
PH560_02640-RE	KNE91264.1/7.5e-48/hypothetical protein PSTG_15329 [Puccinia striiformis f. sp. tritici PST-78]	NA
PH560_02640-RH	KNE91264.1/8.1e-47/hypothetical protein PSTG_15329 [Puccinia striiformis f. sp. tritici PST-78]	NA
PH560_02640-RI	KNE91264.1/9.5e-47/hypothetical protein PSTG_15329 [Puccinia striiformis f. sp. tritici PST-78]	NA
PH560_02640-RA	KNE91264.1/5.1e-60/hypothetical protein PSTG_15329 [Puccinia striiformis f. sp. tritici PST-78]	NA
PH560_02640-RC	KNE91264.1/4.7e-32/hypothetical protein PSTG_15329 [Puccinia striiformis f. sp. tritici PST-78]	NA
PH560_02640-RD	KNE91264.1/7.0e-24/hypothetical protein PSTG_15329 [Puccinia striiformis f. sp. tritici PST-78]	NA
PH560_02638-RA	KNZ44125.1/8.4e-68/hypothetical protein VP01_949g2 [Puccinia sorghi]	NA
PH560_02651-RA	XP_003329030.2/5.2e-76/CMGC/CLK protein kinase [Puccinia graminis f. sp. tritici CRL 75-36-700-3]	sp|Q10156|LKH1_SCHPO/8.5e-31/Dual specificity protein kinase lkh1 OS=Schizosaccharomyces pombe (strain 972 / ATCC 24843) GN=lkh1 PE=1 SV=3
PH560_02655-RB	XP_003321861.1/2.6e-57/60S ribosomal protein L34 [Puccinia graminis f. sp. tritici CRL 75-36-700-3]	sp|P40525|RL34B_YEAST/5.8e-33/60S ribosomal protein L34-B OS=Saccharomyces cerevisiae (strain ATCC 204508 / S288c) GN=RPL34B PE=1 SV=1
PH560_02655-RA	XP_003321861.1/7.4e-44/60S ribosomal protein L34 [Puccinia graminis f. sp. tritici CRL 75-36-700-3]	sp|P87262|RL34A_YEAST/1.7e-24/60S ribosomal protein L34-A OS=Saccharomyces cerevisiae (strain ATCC 204508 / S288c) GN=RPL34A PE=1 SV=1
PH560_02645-RA	KNE88595.1/8.3e-25/hypothetical protein PSTG_17987 [Puccinia striiformis f. sp. tritici PST-78]	NA
PH560_02654-RA	XP_003335949.2/1.9e-19/hypothetical protein PGTG_17584 [Puccinia graminis f. sp. tritici CRL 75-36-700-3]	NA
PH560_02643-RA	XP_003329560.2/5.8e-06/hypothetical protein PGTG_11310 [Puccinia graminis f. sp. tritici CRL 75-36-700-3]	NA
PH560_02658-RA	KNE92302.1/3.9e-86/hypothetical protein PSTG_14325 [Puccinia striiformis f. sp. tritici PST-78]	sp|Q2HEW5|CHG2_CHAGB/1.1e-27/PKS-NRPS hybrid synthetase CHGG_01239 OS=Chaetomium globosum (strain ATCC 6205 / CBS 148.51 / DSM 1962 / NBRC 6347 / NRRL 1970) GN=CHGG_01239 PE=3 SV=1
PH560_02658-RB	KNE92302.1/1.9e-97/hypothetical protein PSTG_14325 [Puccinia striiformis f. sp. tritici PST-78]	sp|Q2HEW5|CHG2_CHAGB/1.3e-31/PKS-NRPS hybrid synthetase CHGG_01239 OS=Chaetomium globosum (strain ATCC 6205 / CBS 148.51 / DSM 1962 / NBRC 6347 / NRRL 1970) GN=CHGG_01239 PE=3 SV=1
PH560_02660-RA	OAV86135.1/1.2e-140/hypothetical protein PTTG_30062 [Puccinia triticina 1-1 BBBD Race 1]	NA
PH560_02664-RA	XP_003329020.2/3.4e-184/hypothetical protein PGTG_10760 [Puccinia graminis f. sp. tritici CRL 75-36-700-3]	NA
PH560_02667-RD	XP_003337667.2/5.5e-168/hypothetical protein PGTG_19194 [Puccinia graminis f. sp. tritici CRL 75-36-700-3]	NA
PH560_02667-RC	XP_003337667.2/1.0e-166/hypothetical protein PGTG_19194 [Puccinia graminis f. sp. tritici CRL 75-36-700-3]	NA
PH560_02667-RB	XP_003337667.2/1.4e-163/hypothetical protein PGTG_19194 [Puccinia graminis f. sp. tritici CRL 75-36-700-3]	NA
PH560_02667-RA	XP_003337667.2/1.7e-41/hypothetical protein PGTG_19194 [Puccinia graminis f. sp. tritici CRL 75-36-700-3]	NA
PH560_02659-RC	KNE90540.1/2.3e-110/hypothetical protein PSTG_16002 [Puccinia striiformis f. sp. tritici PST-78]	NA
PH560_02659-RD	KNE90540.1/9.9e-82/hypothetical protein PSTG_16002 [Puccinia striiformis f. sp. tritici PST-78]	NA
PH560_02659-RB	OAV92274.1/3.7e-67/hypothetical protein PTTG_27680 [Puccinia triticina 1-1 BBBD Race 1]	NA
PH560_02659-RG	KNE90540.1/5.1e-52/hypothetical protein PSTG_16002 [Puccinia striiformis f. sp. tritici PST-78]	NA
PH560_02659-RF	KNE90540.1/2.5e-45/hypothetical protein PSTG_16002 [Puccinia striiformis f. sp. tritici PST-78]	NA
PH560_02659-RA	OAV92274.1/8.1e-51/hypothetical protein PTTG_27680 [Puccinia triticina 1-1 BBBD Race 1]	NA
PH560_02659-RH	KNE90540.1/3.8e-34/hypothetical protein PSTG_16002 [Puccinia striiformis f. sp. tritici PST-78]	NA
PH560_02659-RI	KNE90540.1/1.9e-30/hypothetical protein PSTG_16002 [Puccinia striiformis f. sp. tritici PST-78]	NA
PH560_02659-RE	KNE90540.1/4.4e-09/hypothetical protein PSTG_16002 [Puccinia striiformis f. sp. tritici PST-78]	NA
PH560_02663-RA	OAV90250.1/6.1e-204/hypothetical protein PTTG_04649 [Puccinia triticina 1-1 BBBD Race 1]	sp|O36030|YEKI_SCHPO/6.1e-07/Uncharacterized WD repeat-containing protein C4F10.18 OS=Schizosaccharomyces pombe (strain 972 / ATCC 24843) GN=SPAC4F10.18 PE=1 SV=1
PH560_02663-RB	OAV90250.1/1.2e-154/hypothetical protein PTTG_04649 [Puccinia triticina 1-1 BBBD Race 1]	NA
PH560_02668-RA	OAV91290.1/4.0e-152/hypothetical protein PTTG_28021 [Puccinia triticina 1-1 BBBD Race 1]	NA
PH560_02668-RD	OAV91290.1/2.8e-160/hypothetical protein PTTG_28021 [Puccinia triticina 1-1 BBBD Race 1]	NA
PH560_02668-RC	OAV91290.1/8.6e-156/hypothetical protein PTTG_28021 [Puccinia triticina 1-1 BBBD Race 1]	NA
PH560_02668-RB	OAV91290.1/6.0e-154/hypothetical protein PTTG_28021 [Puccinia triticina 1-1 BBBD Race 1]	NA
PH560_02662-RB	OAV90242.1/2.4e-125/hypothetical protein PTTG_04654 [Puccinia triticina 1-1 BBBD Race 1]	NA
PH560_02662-RA	OAV90242.1/4.4e-87/hypothetical protein PTTG_04654 [Puccinia triticina 1-1 BBBD Race 1]	NA
PH560_02665-RA	OAV90255.1/4.0e-105/hypothetical protein PTTG_04647 [Puccinia triticina 1-1 BBBD Race 1]	NA
PH560_02665-RB	XP_003329011.1/1.1e-95/hypothetical protein PGTG_10751 [Puccinia graminis f. sp. tritici CRL 75-36-700-3]	NA
PH560_02661-RA	OAV86136.1/1.3e-108/hypothetical protein PTTG_30063 [Puccinia triticina 1-1 BBBD Race 1]	NA
PH560_02666-RE	XP_003890723.1/2.8e-84/hypothetical protein PGTG_20752 [Puccinia graminis f. sp. tritici CRL 75-36-700-3]	NA
PH560_02666-RD	XP_003890723.1/1.6e-75/hypothetical protein PGTG_20752 [Puccinia graminis f. sp. tritici CRL 75-36-700-3]	NA
PH560_02666-RC	OAV86597.1/8.0e-72/hypothetical protein PTTG_29818 [Puccinia triticina 1-1 BBBD Race 1]	NA
PH560_02666-RB	XP_003890465.1/9.4e-42/hypothetical protein PGTG_20921 [Puccinia graminis f. sp. tritici CRL 75-36-700-3]	NA
PH560_02666-RH	XP_003307476.2/9.1e-39/hypothetical protein PGTG_00426 [Puccinia graminis f. sp. tritici CRL 75-36-700-3]	NA
PH560_02666-RG	NA	NA
PH560_02666-RF	XP_003307476.2/4.3e-42/hypothetical protein PGTG_00426 [Puccinia graminis f. sp. tritici CRL 75-36-700-3]	NA
PH560_02666-RA	XP_003890723.1/3.7e-20/hypothetical protein PGTG_20752 [Puccinia graminis f. sp. tritici CRL 75-36-700-3]	NA
PH560_02656-RB	NA	NA
PH560_02656-RA	XP_003322515.1/1.7e-28/hypothetical protein PGTG_04052 [Puccinia graminis f. sp. tritici CRL 75-36-700-3]	NA
PH560_02657-RA	KNZ49535.1/1.5e-57/hypothetical protein VP01_4956g1 [Puccinia sorghi]	NA
PH560_02676-RB	OAV90259.1/0.0e+00/CMGC/DYRK/DYRK2 protein kinase [Puccinia triticina 1-1 BBBD Race 1]	sp|Q09690|POM1_SCHPO/2.3e-110/Dual specificity protein kinase pom1 OS=Schizosaccharomyces pombe (strain 972 / ATCC 24843) GN=pom1 PE=1 SV=1
PH560_02676-RC	OAV90259.1/0.0e+00/CMGC/DYRK/DYRK2 protein kinase [Puccinia triticina 1-1 BBBD Race 1]	sp|Q09690|POM1_SCHPO/3.9e-110/Dual specificity protein kinase pom1 OS=Schizosaccharomyces pombe (strain 972 / ATCC 24843) GN=pom1 PE=1 SV=1
PH560_02676-RA	OAV90259.1/0.0e+00/CMGC/DYRK/DYRK2 protein kinase [Puccinia triticina 1-1 BBBD Race 1]	sp|Q09690|POM1_SCHPO/4.1e-111/Dual specificity protein kinase pom1 OS=Schizosaccharomyces pombe (strain 972 / ATCC 24843) GN=pom1 PE=1 SV=1
PH560_02679-RB	XP_003329002.2/0.0e+00/hypothetical protein PGTG_10742 [Puccinia graminis f. sp. tritici CRL 75-36-700-3]	sp|Q8WZK0|US107_SCHPO/5.6e-10/U1 snRNP-associated protein usp107 OS=Schizosaccharomyces pombe (strain 972 / ATCC 24843) GN=usp107 PE=1 SV=1
PH560_02679-RA	XP_003329002.2/0.0e+00/hypothetical protein PGTG_10742 [Puccinia graminis f. sp. tritici CRL 75-36-700-3]	sp|Q8WZK0|US107_SCHPO/5.7e-10/U1 snRNP-associated protein usp107 OS=Schizosaccharomyces pombe (strain 972 / ATCC 24843) GN=usp107 PE=1 SV=1
PH560_02672-RI	KNZ60590.1/2.8e-74/uncharacterized protein VP01_1532g9 [Puccinia sorghi]	NA
PH560_02672-RG	KNZ61320.1/8.1e-60/uncharacterized protein VP01_141g3 [Puccinia sorghi]	NA
PH560_02672-RF	KNZ57602.1/1.5e-76/uncharacterized protein VP01_2116g1 [Puccinia sorghi]	NA
PH560_02672-RH	KNZ60590.1/4.5e-80/uncharacterized protein VP01_1532g9 [Puccinia sorghi]	NA
PH560_02672-RE	KNZ57602.1/1.1e-72/uncharacterized protein VP01_2116g1 [Puccinia sorghi]	NA
PH560_02672-RK	XP_003888705.1/1.7e-65/hypothetical protein PGTG_22517 [Puccinia graminis f. sp. tritici CRL 75-36-700-3]	NA
PH560_02672-RJ	XP_003888705.1/1.3e-65/hypothetical protein PGTG_22517 [Puccinia graminis f. sp. tritici CRL 75-36-700-3]	NA
PH560_02672-RA	KNZ61320.1/3.0e-29/uncharacterized protein VP01_141g3 [Puccinia sorghi]	NA
PH560_02672-RD	KNZ61320.1/2.3e-39/uncharacterized protein VP01_141g3 [Puccinia sorghi]	NA
PH560_02672-RC	KNZ58613.1/2.3e-37/uncharacterized protein VP01_1896g2 [Puccinia sorghi]	NA
PH560_02672-RB	KNZ57055.1/1.4e-33/hypothetical protein VP01_2254g7 [Puccinia sorghi]	NA
PH560_02669-RB	OAV99426.1/5.5e-284/hypothetical protein PTTG_04513 [Puccinia triticina 1-1 BBBD Race 1]	sp|P53388|DIP5_YEAST/1.4e-119/Dicarboxylic amino acid permease OS=Saccharomyces cerevisiae (strain ATCC 204508 / S288c) GN=DIP5 PE=1 SV=1
PH560_02669-RC	OAV99426.1/1.1e-281/hypothetical protein PTTG_04513 [Puccinia triticina 1-1 BBBD Race 1]	sp|P53388|DIP5_YEAST/6.7e-122/Dicarboxylic amino acid permease OS=Saccharomyces cerevisiae (strain ATCC 204508 / S288c) GN=DIP5 PE=1 SV=1
PH560_02669-RA	OAV99426.1/2.6e-278/hypothetical protein PTTG_04513 [Puccinia triticina 1-1 BBBD Race 1]	sp|P53388|DIP5_YEAST/3.3e-121/Dicarboxylic amino acid permease OS=Saccharomyces cerevisiae (strain ATCC 204508 / S288c) GN=DIP5 PE=1 SV=1
PH560_02669-RD	KNE93685.1/9.9e-264/hypothetical protein PSTG_12966 [Puccinia striiformis f. sp. tritici PST-78]	sp|P53388|DIP5_YEAST/8.5e-119/Dicarboxylic amino acid permease OS=Saccharomyces cerevisiae (strain ATCC 204508 / S288c) GN=DIP5 PE=1 SV=1
PH560_02669-RF	OAV99426.1/2.1e-217/hypothetical protein PTTG_04513 [Puccinia triticina 1-1 BBBD Race 1]	sp|P18696|PUTX_EMENI/1.1e-93/Proline-specific permease OS=Emericella nidulans (strain FGSC A4 / ATCC 38163 / CBS 112.46 / NRRL 194 / M139) GN=prnB PE=2 SV=2
PH560_02669-RE	KNE93685.1/1.0e-144/hypothetical protein PSTG_12966 [Puccinia striiformis f. sp. tritici PST-78]	sp|P18696|PUTX_EMENI/2.1e-70/Proline-specific permease OS=Emericella nidulans (strain FGSC A4 / ATCC 38163 / CBS 112.46 / NRRL 194 / M139) GN=prnB PE=2 SV=2
PH560_02669-RG	OAV99426.1/6.7e-164/hypothetical protein PTTG_04513 [Puccinia triticina 1-1 BBBD Race 1]	sp|P04817|CAN1_YEAST/5.1e-76/Arginine permease CAN1 OS=Saccharomyces cerevisiae (strain ATCC 204508 / S288c) GN=CAN1 PE=1 SV=2
PH560_02669-RH	OAV99426.1/3.8e-145/hypothetical protein PTTG_04513 [Puccinia triticina 1-1 BBBD Race 1]	sp|P04817|CAN1_YEAST/1.0e-70/Arginine permease CAN1 OS=Saccharomyces cerevisiae (strain ATCC 204508 / S288c) GN=CAN1 PE=1 SV=2
PH560_02669-RI	OAV99426.1/1.8e-144/hypothetical protein PTTG_04513 [Puccinia triticina 1-1 BBBD Race 1]	sp|P04817|CAN1_YEAST/1.5e-68/Arginine permease CAN1 OS=Saccharomyces cerevisiae (strain ATCC 204508 / S288c) GN=CAN1 PE=1 SV=2
PH560_02669-RJ	OAV99426.1/1.8e-126/hypothetical protein PTTG_04513 [Puccinia triticina 1-1 BBBD Race 1]	sp|P04817|CAN1_YEAST/9.3e-48/Arginine permease CAN1 OS=Saccharomyces cerevisiae (strain ATCC 204508 / S288c) GN=CAN1 PE=1 SV=2
PH560_02669-RK	OAV99426.1/4.2e-88/hypothetical protein PTTG_04513 [Puccinia triticina 1-1 BBBD Race 1]	sp|P32487|LYP1_YEAST/1.5e-26/Lysine-specific permease OS=Saccharomyces cerevisiae (strain ATCC 204508 / S288c) GN=LYP1 PE=1 SV=2
PH560_02675-RD	XP_003336989.1/4.9e-106/hypothetical protein PGTG_18702 [Puccinia graminis f. sp. tritici CRL 75-36-700-3]	sp|P0CT33|TLH1_SCHPO/1.1e-06/ATP-dependent DNA helicase tlh1 (Fragment) OS=Schizosaccharomyces pombe (strain 972 / ATCC 24843) GN=tlh1 PE=3 SV=1
PH560_02675-RB	OAV85651.1/1.3e-132/hypothetical protein PTTG_30366, partial [Puccinia triticina 1-1 BBBD Race 1]	NA
PH560_02675-RA	OAV85651.1/2.1e-148/hypothetical protein PTTG_30366, partial [Puccinia triticina 1-1 BBBD Race 1]	NA
PH560_02675-RC	OAV85651.1/3.4e-144/hypothetical protein PTTG_30366, partial [Puccinia triticina 1-1 BBBD Race 1]	sp|P0CT33|TLH1_SCHPO/1.1e-06/ATP-dependent DNA helicase tlh1 (Fragment) OS=Schizosaccharomyces pombe (strain 972 / ATCC 24843) GN=tlh1 PE=3 SV=1
PH560_02677-RA	OAV99689.1/1.2e-120/hypothetical protein PTTG_25256 [Puccinia triticina 1-1 BBBD Race 1]	NA
PH560_02677-RB	OAV99689.1/8.7e-121/hypothetical protein PTTG_25256 [Puccinia triticina 1-1 BBBD Race 1]	NA
PH560_02677-RC	OAV99689.1/5.4e-120/hypothetical protein PTTG_25256 [Puccinia triticina 1-1 BBBD Race 1]	NA
PH560_02677-RD	NA	NA
PH560_02671-RA	OAV89207.1/1.1e-109/hypothetical protein PTTG_08982 [Puccinia triticina 1-1 BBBD Race 1]	sp|P53600|COPZ_YEAST/2.9e-30/Coatomer subunit zeta OS=Saccharomyces cerevisiae (strain ATCC 204508 / S288c) GN=RET3 PE=1 SV=1
PH560_02671-RB	KNE93686.1/9.9e-80/hypothetical protein PSTG_12967 [Puccinia striiformis f. sp. tritici PST-78]	sp|P53600|COPZ_YEAST/9.8e-24/Coatomer subunit zeta OS=Saccharomyces cerevisiae (strain ATCC 204508 / S288c) GN=RET3 PE=1 SV=1
PH560_02674-RB	KNE98634.1/1.3e-17/hypothetical protein PSTG_08003, partial [Puccinia striiformis f. sp. tritici PST-78]	NA
PH560_02674-RA	KNZ45271.1/1.9e-12/hypothetical protein VP01_830g3, partial [Puccinia sorghi]	NA
PH560_02670-RA	XP_003325006.2/4.6e-21/hypothetical protein PGTG_06543 [Puccinia graminis f. sp. tritici CRL 75-36-700-3]	NA
PH560_02670-RB	XP_003325006.2/2.7e-21/hypothetical protein PGTG_06543 [Puccinia graminis f. sp. tritici CRL 75-36-700-3]	NA
PH560_02673-RA	XP_003325006.2/5.4e-16/hypothetical protein PGTG_06543 [Puccinia graminis f. sp. tritici CRL 75-36-700-3]	NA
PH560_02673-RB	XP_003325006.2/3.1e-16/hypothetical protein PGTG_06543 [Puccinia graminis f. sp. tritici CRL 75-36-700-3]	NA
PH560_02678-RA	XP_003889034.1/3.2e-13/hypothetical protein PGTG_22221 [Puccinia graminis f. sp. tritici CRL 75-36-700-3]	NA
PH560_02685-RA	OAV90262.1/1.3e-249/hypothetical protein PTTG_04642 [Puccinia triticina 1-1 BBBD Race 1]	NA
PH560_02685-RB	OAV90262.1/3.6e-203/hypothetical protein PTTG_04642 [Puccinia triticina 1-1 BBBD Race 1]	NA
PH560_02687-RC	OAV95328.1/4.7e-202/hypothetical protein PTTG_26718 [Puccinia triticina 1-1 BBBD Race 1]	NA
PH560_02687-RA	XP_003333208.2/1.3e-223/hypothetical protein PGTG_14128 [Puccinia graminis f. sp. tritici CRL 75-36-700-3]	NA
PH560_02687-RF	XP_003333208.2/7.6e-69/hypothetical protein PGTG_14128 [Puccinia graminis f. sp. tritici CRL 75-36-700-3]	NA
PH560_02687-RD	XP_003333208.2/5.2e-157/hypothetical protein PGTG_14128 [Puccinia graminis f. sp. tritici CRL 75-36-700-3]	NA
PH560_02687-RE	XP_003333208.2/3.1e-154/hypothetical protein PGTG_14128 [Puccinia graminis f. sp. tritici CRL 75-36-700-3]	NA
PH560_02687-RB	XP_003889744.1/1.4e-97/hypothetical protein PGTG_21590 [Puccinia graminis f. sp. tritici CRL 75-36-700-3]	NA
PH560_02686-RA	OAV90253.1/8.6e-221/hypothetical protein PTTG_28377 [Puccinia triticina 1-1 BBBD Race 1]	sp|Q01356|ARG13_NEUCR/2.7e-14/Amino-acid transporter arg-13 OS=Neurospora crassa (strain ATCC 24698 / 74-OR23-1A / CBS 708.71 / DSM 1257 / FGSC 987) GN=arg-13 PE=2 SV=1
PH560_02686-RC	OAV90253.1/3.5e-141/hypothetical protein PTTG_28377 [Puccinia triticina 1-1 BBBD Race 1]	sp|Q01356|ARG13_NEUCR/1.3e-10/Amino-acid transporter arg-13 OS=Neurospora crassa (strain ATCC 24698 / 74-OR23-1A / CBS 708.71 / DSM 1257 / FGSC 987) GN=arg-13 PE=2 SV=1
PH560_02686-RB	OAV90253.1/2.5e-60/hypothetical protein PTTG_28377 [Puccinia triticina 1-1 BBBD Race 1]	NA
PH560_02681-RA	XP_003889256.1/9.9e-73/hypothetical protein PGTG_22034 [Puccinia graminis f. sp. tritici CRL 75-36-700-3]	sp|Q2HEW5|CHG2_CHAGB/2.4e-07/PKS-NRPS hybrid synthetase CHGG_01239 OS=Chaetomium globosum (strain ATCC 6205 / CBS 148.51 / DSM 1962 / NBRC 6347 / NRRL 1970) GN=CHGG_01239 PE=3 SV=1
PH560_02690-RA	XP_003328991.2/2.1e-140/hypothetical protein PGTG_10731 [Puccinia graminis f. sp. tritici CRL 75-36-700-3]	NA
PH560_02680-RA	KNE88595.1/1.2e-68/hypothetical protein PSTG_17987 [Puccinia striiformis f. sp. tritici PST-78]	NA
PH560_02689-RA	OAV90263.1/5.5e-73/hypothetical protein PTTG_28382 [Puccinia triticina 1-1 BBBD Race 1]	NA
PH560_02689-RB	NA	NA
PH560_02683-RA	KNZ54030.1/1.4e-31/hypothetical protein VP01_3069g1 [Puccinia sorghi]	NA
PH560_02688-RA	OAV97139.1/9.4e-23/hypothetical protein PTTG_26152 [Puccinia triticina 1-1 BBBD Race 1]	NA
PH560_02684-RA	KNE96900.1/8.7e-28/hypothetical protein PSTG_09884 [Puccinia striiformis f. sp. tritici PST-78]	sp|P0CP05|MZT1_CRYNB/1.7e-12/Mitotic-spindle organizing protein 1 OS=Cryptococcus neoformans var. neoformans serotype D (strain B-3501A) GN=CNBA1680 PE=3 SV=1
PH560_02682-RA	XP_003326405.2/8.0e-14/hypothetical protein PGTG_08235 [Puccinia graminis f. sp. tritici CRL 75-36-700-3]	NA
PH560_02697-RD	EUC53577.1/8.9e-249/Transposon Tf2-1 polyprotein, putative [Rhizoctonia solani AG-3 Rhs1AP]	sp|P0CT41|TF212_SCHPO/2.1e-133/Transposon Tf2-12 polyprotein OS=Schizosaccharomyces pombe (strain 972 / ATCC 24843) GN=Tf2-12 PE=3 SV=1
PH560_02697-RC	EUC53577.1/8.5e-249/Transposon Tf2-1 polyprotein, putative [Rhizoctonia solani AG-3 Rhs1AP]	sp|P0CT41|TF212_SCHPO/2.0e-133/Transposon Tf2-12 polyprotein OS=Schizosaccharomyces pombe (strain 972 / ATCC 24843) GN=Tf2-12 PE=3 SV=1
PH560_02697-RB	EUC53577.1/7.8e-249/Transposon Tf2-1 polyprotein, putative [Rhizoctonia solani AG-3 Rhs1AP]	sp|P0CT41|TF212_SCHPO/1.8e-133/Transposon Tf2-12 polyprotein OS=Schizosaccharomyces pombe (strain 972 / ATCC 24843) GN=Tf2-12 PE=3 SV=1
PH560_02697-RA	EUC53577.1/7.3e-249/Transposon Tf2-1 polyprotein, putative [Rhizoctonia solani AG-3 Rhs1AP]	sp|P0CT41|TF212_SCHPO/1.7e-133/Transposon Tf2-12 polyprotein OS=Schizosaccharomyces pombe (strain 972 / ATCC 24843) GN=Tf2-12 PE=3 SV=1
PH560_02703-RC	KNF01329.1/1.3e-132/hypothetical protein PSTG_05428 [Puccinia striiformis f. sp. tritici PST-78]	sp|Q99337|YN12B_YEAST/8.3e-20/Transposon Ty1-NL2 Gag-Pol polyprotein OS=Saccharomyces cerevisiae (strain ATCC 204508 / S288c) GN=TY1B-NL2 PE=3 SV=1
PH560_02703-RB	KNF01329.1/7.8e-121/hypothetical protein PSTG_05428 [Puccinia striiformis f. sp. tritici PST-78]	sp|Q99337|YN12B_YEAST/7.5e-20/Transposon Ty1-NL2 Gag-Pol polyprotein OS=Saccharomyces cerevisiae (strain ATCC 204508 / S288c) GN=TY1B-NL2 PE=3 SV=1
PH560_02703-RA	KNF01329.1/5.9e-121/hypothetical protein PSTG_05428 [Puccinia striiformis f. sp. tritici PST-78]	sp|Q99337|YN12B_YEAST/7.5e-20/Transposon Ty1-NL2 Gag-Pol polyprotein OS=Saccharomyces cerevisiae (strain ATCC 204508 / S288c) GN=TY1B-NL2 PE=3 SV=1
PH560_02698-RA	EXX50149.1/6.8e-115/gag-pol fusion protein [Rhizophagus irregularis DAOM 197198w]	sp|Q07791|YD23B_YEAST/2.8e-28/Transposon Ty2-DR3 Gag-Pol polyprotein OS=Saccharomyces cerevisiae (strain ATCC 204508 / S288c) GN=TY2B-DR3 PE=3 SV=1
PH560_02698-RE	EXX50149.1/3.7e-115/gag-pol fusion protein [Rhizophagus irregularis DAOM 197198w]	sp|Q07791|YD23B_YEAST/2.5e-28/Transposon Ty2-DR3 Gag-Pol polyprotein OS=Saccharomyces cerevisiae (strain ATCC 204508 / S288c) GN=TY2B-DR3 PE=3 SV=1
PH560_02698-RG	EXX50149.1/3.6e-115/gag-pol fusion protein [Rhizophagus irregularis DAOM 197198w]	sp|Q07791|YD23B_YEAST/2.5e-28/Transposon Ty2-DR3 Gag-Pol polyprotein OS=Saccharomyces cerevisiae (strain ATCC 204508 / S288c) GN=TY2B-DR3 PE=3 SV=1
PH560_02698-RH	EXX50149.1/3.1e-117/gag-pol fusion protein [Rhizophagus irregularis DAOM 197198w]	sp|Q07791|YD23B_YEAST/2.0e-28/Transposon Ty2-DR3 Gag-Pol polyprotein OS=Saccharomyces cerevisiae (strain ATCC 204508 / S288c) GN=TY2B-DR3 PE=3 SV=1
PH560_02698-RB	EXX50149.1/6.6e-115/gag-pol fusion protein [Rhizophagus irregularis DAOM 197198w]	sp|Q07791|YD23B_YEAST/2.7e-28/Transposon Ty2-DR3 Gag-Pol polyprotein OS=Saccharomyces cerevisiae (strain ATCC 204508 / S288c) GN=TY2B-DR3 PE=3 SV=1
PH560_02698-RC	EXX50149.1/6.5e-115/gag-pol fusion protein [Rhizophagus irregularis DAOM 197198w]	sp|Q07791|YD23B_YEAST/2.6e-28/Transposon Ty2-DR3 Gag-Pol polyprotein OS=Saccharomyces cerevisiae (strain ATCC 204508 / S288c) GN=TY2B-DR3 PE=3 SV=1
PH560_02698-RD	EXX50149.1/6.3e-115/gag-pol fusion protein [Rhizophagus irregularis DAOM 197198w]	sp|Q07791|YD23B_YEAST/2.5e-28/Transposon Ty2-DR3 Gag-Pol polyprotein OS=Saccharomyces cerevisiae (strain ATCC 204508 / S288c) GN=TY2B-DR3 PE=3 SV=1
PH560_02698-RF	EXX50149.1/6.3e-115/gag-pol fusion protein [Rhizophagus irregularis DAOM 197198w]	sp|Q07791|YD23B_YEAST/2.5e-28/Transposon Ty2-DR3 Gag-Pol polyprotein OS=Saccharomyces cerevisiae (strain ATCC 204508 / S288c) GN=TY2B-DR3 PE=3 SV=1
PH560_02702-RD	OAV90277.1/0.0e+00/hypothetical protein PTTG_05308 [Puccinia triticina 1-1 BBBD Race 1]	NA
PH560_02702-RC	OAV90277.1/0.0e+00/hypothetical protein PTTG_05308 [Puccinia triticina 1-1 BBBD Race 1]	NA
PH560_02702-RB	OAV90277.1/0.0e+00/hypothetical protein PTTG_05308 [Puccinia triticina 1-1 BBBD Race 1]	NA
PH560_02702-RA	OAV90277.1/3.7e-149/hypothetical protein PTTG_05308 [Puccinia triticina 1-1 BBBD Race 1]	NA
PH560_02702-RE	XP_003328981.2/8.8e-81/hypothetical protein PGTG_10721 [Puccinia graminis f. sp. tritici CRL 75-36-700-3]	NA
PH560_02692-RA	KNE92302.1/1.1e-83/hypothetical protein PSTG_14325 [Puccinia striiformis f. sp. tritici PST-78]	sp|Q2HEW5|CHG2_CHAGB/8.3e-28/PKS-NRPS hybrid synthetase CHGG_01239 OS=Chaetomium globosum (strain ATCC 6205 / CBS 148.51 / DSM 1962 / NBRC 6347 / NRRL 1970) GN=CHGG_01239 PE=3 SV=1
PH560_02692-RB	KNE92302.1/6.9e-95/hypothetical protein PSTG_14325 [Puccinia striiformis f. sp. tritici PST-78]	sp|Q2HEW5|CHG2_CHAGB/1.0e-31/PKS-NRPS hybrid synthetase CHGG_01239 OS=Chaetomium globosum (strain ATCC 6205 / CBS 148.51 / DSM 1962 / NBRC 6347 / NRRL 1970) GN=CHGG_01239 PE=3 SV=1
PH560_02700-RB	OAV90272.1/2.2e-211/hypothetical protein PTTG_12602 [Puccinia triticina 1-1 BBBD Race 1]	sp|Q4IM48|MCH1_GIBZE/8.5e-27/Probable transporter MCH1 OS=Gibberella zeae (strain PH-1 / ATCC MYA-4620 / FGSC 9075 / NRRL 31084) GN=MCH1 PE=3 SV=1
PH560_02700-RC	OAV90273.1/1.8e-202/hypothetical protein, variant 1 [Puccinia triticina 1-1 BBBD Race 1]	sp|Q6BN11|MCH1_DEBHA/3.2e-23/Probable transporter MCH1 OS=Debaryomyces hansenii (strain ATCC 36239 / CBS 767 / JCM 1990 / NBRC 0083 / IGC 2968) GN=MCH1 PE=3 SV=2
PH560_02700-RA	OAV90272.1/3.0e-177/hypothetical protein PTTG_12602 [Puccinia triticina 1-1 BBBD Race 1]	sp|Q4IM48|MCH1_GIBZE/6.5e-20/Probable transporter MCH1 OS=Gibberella zeae (strain PH-1 / ATCC MYA-4620 / FGSC 9075 / NRRL 31084) GN=MCH1 PE=3 SV=1
PH560_02691-RB	XP_003328993.1/2.2e-171/hypothetical protein PGTG_10733, partial [Puccinia graminis f. sp. tritici CRL 75-36-700-3]	NA
PH560_02691-RA	XP_003328993.1/7.7e-180/hypothetical protein PGTG_10733, partial [Puccinia graminis f. sp. tritici CRL 75-36-700-3]	NA
PH560_02699-RA	OAV94222.1/3.8e-122/hypothetical protein PTTG_00617 [Puccinia triticina 1-1 BBBD Race 1]	NA
PH560_02699-RB	OAV94222.1/1.7e-166/hypothetical protein PTTG_00617 [Puccinia triticina 1-1 BBBD Race 1]	NA
PH560_02695-RA	XP_003889256.1/2.9e-62/hypothetical protein PGTG_22034 [Puccinia graminis f. sp. tritici CRL 75-36-700-3]	NA
PH560_02693-RA	KNE88595.1/2.6e-23/hypothetical protein PSTG_17987 [Puccinia striiformis f. sp. tritici PST-78]	NA
PH560_02694-RA	AFN02844.1/2.2e-22/putative mutator-like element transposase, partial [Phakopsora pachyrhizi]	NA
PH560_02694-RB	AFN02844.1/1.3e-13/putative mutator-like element transposase, partial [Phakopsora pachyrhizi]	NA
PH560_02701-RA	NA	NA
PH560_02696-RA	XP_003326405.2/3.6e-14/hypothetical protein PGTG_08235 [Puccinia graminis f. sp. tritici CRL 75-36-700-3]	NA
PH560_02706-RB	OAW00107.1/3.9e-241/hypothetical protein PTTG_05947 [Puccinia triticina 1-1 BBBD Race 1]	sp|O14206|YDD3_SCHPO/1.0e-52/Brix domain-containing protein C1B9.03c OS=Schizosaccharomyces pombe (strain 972 / ATCC 24843) GN=SPAC1B9.03c PE=1 SV=2
PH560_02706-RA	OAW00107.1/4.3e-243/hypothetical protein PTTG_05947 [Puccinia triticina 1-1 BBBD Race 1]	sp|O14206|YDD3_SCHPO/1.7e-50/Brix domain-containing protein C1B9.03c OS=Schizosaccharomyces pombe (strain 972 / ATCC 24843) GN=SPAC1B9.03c PE=1 SV=2
PH560_02710-RA	OAV90292.1/1.8e-114/hypothetical protein PTTG_08654 [Puccinia triticina 1-1 BBBD Race 1]	NA
PH560_02710-RB	OAV90292.1/3.7e-70/hypothetical protein PTTG_08654 [Puccinia triticina 1-1 BBBD Race 1]	NA
PH560_02705-RA	OAV97042.1/2.3e-101/hypothetical protein PTTG_12381 [Puccinia triticina 1-1 BBBD Race 1]	NA
PH560_02705-RB	OAV89885.1/7.1e-101/hypothetical protein PTTG_05665 [Puccinia triticina 1-1 BBBD Race 1]	NA
PH560_02707-RB	XP_003328964.2/1.4e-174/hypothetical protein PGTG_10704 [Puccinia graminis f. sp. tritici CRL 75-36-700-3]	sp|O14241|ARPC2_SCHPO/1.2e-85/Actin-related protein 2/3 complex subunit 2 OS=Schizosaccharomyces pombe (strain 972 / ATCC 24843) GN=arc2 PE=1 SV=1
PH560_02707-RA	XP_003328964.2/2.1e-170/hypothetical protein PGTG_10704 [Puccinia graminis f. sp. tritici CRL 75-36-700-3]	sp|O14241|ARPC2_SCHPO/1.5e-83/Actin-related protein 2/3 complex subunit 2 OS=Schizosaccharomyces pombe (strain 972 / ATCC 24843) GN=arc2 PE=1 SV=1
PH560_02707-RC	NA	NA
PH560_02708-RA	OAV90289.1/5.1e-64/hypothetical protein PTTG_08652 [Puccinia triticina 1-1 BBBD Race 1]	NA
PH560_02712-RA	KNE91264.1/2.0e-28/hypothetical protein PSTG_15329 [Puccinia striiformis f. sp. tritici PST-78]	NA
PH560_02712-RB	KNE91264.1/1.8e-20/hypothetical protein PSTG_15329 [Puccinia striiformis f. sp. tritici PST-78]	NA
PH560_02709-RA	KNE91264.1/1.9e-38/hypothetical protein PSTG_15329 [Puccinia striiformis f. sp. tritici PST-78]	NA
PH560_02711-RA	OAV90293.1/2.7e-24/ATP synthase F1, gamma subunit [Puccinia triticina 1-1 BBBD Race 1]	sp|P49377|ATPG_KLULA/1.5e-11/ATP synthase subunit gamma, mitochondrial OS=Kluyveromyces lactis (strain ATCC 8585 / CBS 2359 / DSM 70799 / NBRC 1267 / NRRL Y-1140 / WM37) GN=ATP3 PE=1 SV=1
PH560_02704-RA	KNE89320.1/1.8e-09/hypothetical protein PSTG_17223 [Puccinia striiformis f. sp. tritici PST-78]	NA
PH560_02713-RB	CDO71000.1/2.0e-119/hypothetical protein BN946_scf184844.g4 [Trametes cinnabarina]	sp|P0C2J7|YH41B_YEAST/3.8e-22/Transposon Ty4-H Gag-Pol polyprotein OS=Saccharomyces cerevisiae (strain ATCC 204508 / S288c) GN=TY4B-H PE=1 SV=1
PH560_02713-RA	CDO71000.1/4.9e-118/hypothetical protein BN946_scf184844.g4 [Trametes cinnabarina]	sp|P0C2J7|YH41B_YEAST/3.7e-22/Transposon Ty4-H Gag-Pol polyprotein OS=Saccharomyces cerevisiae (strain ATCC 204508 / S288c) GN=TY4B-H PE=1 SV=1
PH560_02720-RA	OAV90295.1/0.0e+00/hypothetical protein PTTG_08657 [Puccinia triticina 1-1 BBBD Race 1]	sp|O13921|MSH1_SCHPO/1.4e-60/MutS protein homolog 1 OS=Schizosaccharomyces pombe (strain 972 / ATCC 24843) GN=msh1 PE=3 SV=2
PH560_02720-RB	OAV90295.1/0.0e+00/hypothetical protein PTTG_08657 [Puccinia triticina 1-1 BBBD Race 1]	sp|O13921|MSH1_SCHPO/1.6e-55/MutS protein homolog 1 OS=Schizosaccharomyces pombe (strain 972 / ATCC 24843) GN=msh1 PE=3 SV=2
PH560_02719-RA	XP_003328968.1/1.1e-189/hypothetical protein PGTG_10708 [Puccinia graminis f. sp. tritici CRL 75-36-700-3]	sp|P56329|IF2B_SCHPO/1.4e-64/Probable eukaryotic translation initiation factor 2 subunit beta OS=Schizosaccharomyces pombe (strain 972 / ATCC 24843) GN=tif212 PE=1 SV=2
PH560_02719-RB	XP_003328968.1/1.3e-165/hypothetical protein PGTG_10708 [Puccinia graminis f. sp. tritici CRL 75-36-700-3]	sp|P56329|IF2B_SCHPO/5.1e-63/Probable eukaryotic translation initiation factor 2 subunit beta OS=Schizosaccharomyces pombe (strain 972 / ATCC 24843) GN=tif212 PE=1 SV=2
PH560_02727-RA	XP_003889346.1/2.5e-71/hypothetical protein PGTG_21987 [Puccinia graminis f. sp. tritici CRL 75-36-700-3]	sp|Q2HEW5|CHG2_CHAGB/9.0e-18/PKS-NRPS hybrid synthetase CHGG_01239 OS=Chaetomium globosum (strain ATCC 6205 / CBS 148.51 / DSM 1962 / NBRC 6347 / NRRL 1970) GN=CHGG_01239 PE=3 SV=1
PH560_02726-RA	OAV96168.1/4.8e-113/hypothetical protein PTTG_03408 [Puccinia triticina 1-1 BBBD Race 1]	NA
PH560_02716-RA	KNE88595.1/1.2e-68/hypothetical protein PSTG_17987 [Puccinia striiformis f. sp. tritici PST-78]	NA
PH560_02728-RA	KNE88595.1/1.3e-72/hypothetical protein PSTG_17987 [Puccinia striiformis f. sp. tritici PST-78]	NA
PH560_02728-RB	NA	NA
PH560_02723-RA	OAV88980.1/1.7e-64/hypothetical protein PTTG_28847 [Puccinia triticina 1-1 BBBD Race 1]	NA
PH560_02723-RB	XP_003325781.2/5.4e-23/hypothetical protein PGTG_06983 [Puccinia graminis f. sp. tritici CRL 75-36-700-3]	NA
PH560_02715-RC	KNE91264.1/3.1e-57/hypothetical protein PSTG_15329 [Puccinia striiformis f. sp. tritici PST-78]	NA
PH560_02715-RB	KNE91264.1/1.2e-30/hypothetical protein PSTG_15329 [Puccinia striiformis f. sp. tritici PST-78]	NA
PH560_02715-RA	KNE91264.1/7.7e-23/hypothetical protein PSTG_15329 [Puccinia striiformis f. sp. tritici PST-78]	NA
PH560_02718-RA	OAV99668.1/3.1e-71/hypothetical protein PTTG_00538 [Puccinia triticina 1-1 BBBD Race 1]	NA
PH560_02717-RA	OAV99667.1/1.2e-20/hypothetical protein PTTG_25249 [Puccinia triticina 1-1 BBBD Race 1]	NA
PH560_02725-RA	KNE91264.1/4.8e-28/hypothetical protein PSTG_15329 [Puccinia striiformis f. sp. tritici PST-78]	NA
PH560_02725-RC	KNE91264.1/1.9e-21/hypothetical protein PSTG_15329 [Puccinia striiformis f. sp. tritici PST-78]	NA
PH560_02725-RB	KNE91264.1/1.7e-27/hypothetical protein PSTG_15329 [Puccinia striiformis f. sp. tritici PST-78]	NA
PH560_02725-RD	KNE91264.1/3.1e-21/hypothetical protein PSTG_15329 [Puccinia striiformis f. sp. tritici PST-78]	NA
PH560_02725-RE	NA	NA
PH560_02722-RA	OAV88980.1/3.8e-24/hypothetical protein PTTG_28847 [Puccinia triticina 1-1 BBBD Race 1]	NA
PH560_02724-RA	XP_003321516.2/2.3e-10/hypothetical protein PGTG_03053 [Puccinia graminis f. sp. tritici CRL 75-36-700-3]	NA
PH560_02714-RA	OAV99543.1/1.3e-13/hypothetical protein PTTG_06102 [Puccinia triticina 1-1 BBBD Race 1]	sp|Q12649|HMDH_PHYB8/4.1e-12/3-hydroxy-3-methylglutaryl-coenzyme A reductase OS=Phycomyces blakesleeanus (strain ATCC 8743b / DSM 1359 / FGSC 10004 / NBRC 33097 / NRRL 1555) GN=hmgA PE=3 SV=2
PH560_02721-RA	OAV87019.1/1.3e-17/hypothetical protein PTTG_29615 [Puccinia triticina 1-1 BBBD Race 1]	NA
PH560_02731-RB	OAV85547.1/4.5e-162/hypothetical protein PTTG_30442, partial [Puccinia triticina 1-1 BBBD Race 1]	sp|P47024|YJ41B_YEAST/1.3e-25/Transposon Ty4-J Gag-Pol polyprotein OS=Saccharomyces cerevisiae (strain ATCC 204508 / S288c) GN=TY4B-J PE=3 SV=3
PH560_02731-RD	OAV85547.1/8.7e-166/hypothetical protein PTTG_30442, partial [Puccinia triticina 1-1 BBBD Race 1]	sp|P47024|YJ41B_YEAST/1.3e-25/Transposon Ty4-J Gag-Pol polyprotein OS=Saccharomyces cerevisiae (strain ATCC 204508 / S288c) GN=TY4B-J PE=3 SV=3
PH560_02731-RA	OAV85547.1/1.2e-191/hypothetical protein PTTG_30442, partial [Puccinia triticina 1-1 BBBD Race 1]	sp|P47024|YJ41B_YEAST/1.4e-25/Transposon Ty4-J Gag-Pol polyprotein OS=Saccharomyces cerevisiae (strain ATCC 204508 / S288c) GN=TY4B-J PE=3 SV=3
PH560_02731-RC	OAV85547.1/4.5e-186/hypothetical protein PTTG_30442, partial [Puccinia triticina 1-1 BBBD Race 1]	sp|P47024|YJ41B_YEAST/1.3e-25/Transposon Ty4-J Gag-Pol polyprotein OS=Saccharomyces cerevisiae (strain ATCC 204508 / S288c) GN=TY4B-J PE=3 SV=3
PH560_02733-RA	OAV90287.1/0.0e+00/hypothetical protein PTTG_08650 [Puccinia triticina 1-1 BBBD Race 1]	NA
PH560_02733-RB	XP_003328976.2/0.0e+00/hypothetical protein PGTG_10716 [Puccinia graminis f. sp. tritici CRL 75-36-700-3]	NA
PH560_02733-RC	XP_003328976.2/5.8e-292/hypothetical protein PGTG_10716 [Puccinia graminis f. sp. tritici CRL 75-36-700-3]	NA
PH560_02736-RA	KNE88595.1/9.8e-72/hypothetical protein PSTG_17987 [Puccinia striiformis f. sp. tritici PST-78]	NA
PH560_02736-RB	KNE88595.1/8.7e-72/hypothetical protein PSTG_17987 [Puccinia striiformis f. sp. tritici PST-78]	NA
PH560_02734-RA	KNF01063.1/1.5e-32/hypothetical protein PSTG_05693 [Puccinia striiformis f. sp. tritici PST-78]	NA
PH560_02730-RA	OAV96824.1/6.9e-33/hypothetical protein PTTG_26260 [Puccinia triticina 1-1 BBBD Race 1]	NA
PH560_02737-RA	KNE91891.1/1.6e-35/hypothetical protein PSTG_14688 [Puccinia striiformis f. sp. tritici PST-78]	NA
PH560_02732-RB	OAV93275.1/2.7e-25/hypothetical protein PTTG_27361 [Puccinia triticina 1-1 BBBD Race 1]	NA
PH560_02732-RC	NA	NA
PH560_02732-RA	NA	NA
PH560_02738-RA	XP_003336605.1/2.0e-16/hypothetical protein PGTG_18083 [Puccinia graminis f. sp. tritici CRL 75-36-700-3]	NA
PH560_02735-RA	XP_003326405.2/1.4e-13/hypothetical protein PGTG_08235 [Puccinia graminis f. sp. tritici CRL 75-36-700-3]	NA
PH560_02729-RA	XP_003326405.2/1.4e-13/hypothetical protein PGTG_08235 [Puccinia graminis f. sp. tritici CRL 75-36-700-3]	NA
PH560_02744-RD	XP_003328980.2/0.0e+00/isoleucyl-tRNA synthetase [Puccinia graminis f. sp. tritici CRL 75-36-700-3]	sp|P48526|SYIM_YEAST/2.0e-150/Isoleucine--tRNA ligase, mitochondrial OS=Saccharomyces cerevisiae (strain ATCC 204508 / S288c) GN=ISM1 PE=1 SV=2
PH560_02744-RC	XP_003328980.2/0.0e+00/isoleucyl-tRNA synthetase [Puccinia graminis f. sp. tritici CRL 75-36-700-3]	sp|P48526|SYIM_YEAST/1.2e-146/Isoleucine--tRNA ligase, mitochondrial OS=Saccharomyces cerevisiae (strain ATCC 204508 / S288c) GN=ISM1 PE=1 SV=2
PH560_02744-RF	OAV87470.1/1.8e-176/hypothetical protein PTTG_29421 [Puccinia triticina 1-1 BBBD Race 1]	sp|P48526|SYIM_YEAST/1.3e-30/Isoleucine--tRNA ligase, mitochondrial OS=Saccharomyces cerevisiae (strain ATCC 204508 / S288c) GN=ISM1 PE=1 SV=2
PH560_02744-RA	OAV85484.1/5.2e-152/hypothetical protein PTTG_30488, partial [Puccinia triticina 1-1 BBBD Race 1]	sp|P48526|SYIM_YEAST/2.6e-52/Isoleucine--tRNA ligase, mitochondrial OS=Saccharomyces cerevisiae (strain ATCC 204508 / S288c) GN=ISM1 PE=1 SV=2
PH560_02744-RB	OAV85484.1/5.0e-157/hypothetical protein PTTG_30488, partial [Puccinia triticina 1-1 BBBD Race 1]	sp|P48526|SYIM_YEAST/1.3e-53/Isoleucine--tRNA ligase, mitochondrial OS=Saccharomyces cerevisiae (strain ATCC 204508 / S288c) GN=ISM1 PE=1 SV=2
PH560_02744-RE	XP_003328980.2/2.1e-161/isoleucyl-tRNA synthetase [Puccinia graminis f. sp. tritici CRL 75-36-700-3]	sp|Q9USL3|SYIM_SCHPO/1.1e-63/Isoleucine--tRNA ligase, mitochondrial OS=Schizosaccharomyces pombe (strain 972 / ATCC 24843) GN=ism1 PE=3 SV=1
PH560_02746-RC	OAV90282.1/0.0e+00/hypothetical protein PTTG_08645 [Puccinia triticina 1-1 BBBD Race 1]	NA
PH560_02746-RB	OAV90282.1/0.0e+00/hypothetical protein PTTG_08645 [Puccinia triticina 1-1 BBBD Race 1]	NA
PH560_02746-RA	OAV90282.1/4.4e-173/hypothetical protein PTTG_08645 [Puccinia triticina 1-1 BBBD Race 1]	NA
PH560_02746-RD	XP_003328978.2/6.1e-75/hypothetical protein PGTG_10718 [Puccinia graminis f. sp. tritici CRL 75-36-700-3]	NA
PH560_02749-RA	XP_003328962.1/1.2e-232/aspartate aminotransferase [Puccinia graminis f. sp. tritici CRL 75-36-700-3]	sp|O42652|AATC_SCHPO/1.1e-126/Aspartate aminotransferase, cytoplasmic OS=Schizosaccharomyces pombe (strain 972 / ATCC 24843) GN=aat2 PE=3 SV=1
PH560_02749-RC	XP_003328962.1/2.8e-212/aspartate aminotransferase [Puccinia graminis f. sp. tritici CRL 75-36-700-3]	sp|O42652|AATC_SCHPO/1.0e-113/Aspartate aminotransferase, cytoplasmic OS=Schizosaccharomyces pombe (strain 972 / ATCC 24843) GN=aat2 PE=3 SV=1
PH560_02749-RB	OAV96891.1/1.2e-133/aspartate aminotransferase [Puccinia triticina 1-1 BBBD Race 1]	sp|O42652|AATC_SCHPO/1.1e-81/Aspartate aminotransferase, cytoplasmic OS=Schizosaccharomyces pombe (strain 972 / ATCC 24843) GN=aat2 PE=3 SV=1
PH560_02749-RD	XP_003328962.1/2.7e-65/aspartate aminotransferase [Puccinia graminis f. sp. tritici CRL 75-36-700-3]	sp|O42652|AATC_SCHPO/4.0e-42/Aspartate aminotransferase, cytoplasmic OS=Schizosaccharomyces pombe (strain 972 / ATCC 24843) GN=aat2 PE=3 SV=1
PH560_02739-RD	OAV90280.1/6.4e-99/hypothetical protein PTTG_08723 [Puccinia triticina 1-1 BBBD Race 1]	NA
PH560_02739-RA	OAV90280.1/1.5e-61/hypothetical protein PTTG_08723 [Puccinia triticina 1-1 BBBD Race 1]	NA
PH560_02739-RB	OAV90280.1/4.6e-63/hypothetical protein PTTG_08723 [Puccinia triticina 1-1 BBBD Race 1]	NA
PH560_02739-RC	OAV90280.1/4.5e-60/hypothetical protein PTTG_08723 [Puccinia triticina 1-1 BBBD Race 1]	NA
PH560_02739-RE	NA	NA
PH560_02740-RA	OAV94977.1/2.3e-63/hypothetical protein PTTG_06957 [Puccinia triticina 1-1 BBBD Race 1]	NA
PH560_02740-RB	OAV94977.1/5.0e-26/hypothetical protein PTTG_06957 [Puccinia triticina 1-1 BBBD Race 1]	NA
PH560_02740-RD	OAV94977.1/2.1e-33/hypothetical protein PTTG_06957 [Puccinia triticina 1-1 BBBD Race 1]	NA
PH560_02740-RC	OAV94977.1/9.1e-54/hypothetical protein PTTG_06957 [Puccinia triticina 1-1 BBBD Race 1]	NA
PH560_02742-RA	KNZ57884.1/1.1e-109/uncharacterized protein VP01_204g9 [Puccinia sorghi]	NA
PH560_02750-RC	KNZ64618.1/7.7e-77/uncharacterized protein VP01_100g12 [Puccinia sorghi]	NA
PH560_02750-RB	KNZ64618.1/1.7e-107/uncharacterized protein VP01_100g12 [Puccinia sorghi]	NA
PH560_02750-RA	KNZ64618.1/2.5e-114/uncharacterized protein VP01_100g12 [Puccinia sorghi]	NA
PH560_02748-RA	XP_003319832.2/4.8e-65/hypothetical protein PGTG_00744 [Puccinia graminis f. sp. tritici CRL 75-36-700-3]	sp|O13834|PTR1_SCHPO/1.3e-19/E3 ubiquitin-protein ligase ptr1 OS=Schizosaccharomyces pombe (strain 972 / ATCC 24843) GN=ptr1 PE=1 SV=1
PH560_02748-RB	XP_003319832.2/6.1e-39/hypothetical protein PGTG_00744 [Puccinia graminis f. sp. tritici CRL 75-36-700-3]	sp|O13834|PTR1_SCHPO/5.1e-14/E3 ubiquitin-protein ligase ptr1 OS=Schizosaccharomyces pombe (strain 972 / ATCC 24843) GN=ptr1 PE=1 SV=1
PH560_02745-RA	XP_003328979.1/1.4e-47/hypothetical protein PGTG_10719 [Puccinia graminis f. sp. tritici CRL 75-36-700-3]	sp|O42932|QCR6_SCHPO/4.0e-12/Cytochrome b-c1 complex subunit 6 OS=Schizosaccharomyces pombe (strain 972 / ATCC 24843) GN=qcr6 PE=3 SV=1
PH560_02745-RC	XP_003328979.1/1.1e-48/hypothetical protein PGTG_10719 [Puccinia graminis f. sp. tritici CRL 75-36-700-3]	sp|O42932|QCR6_SCHPO/5.8e-13/Cytochrome b-c1 complex subunit 6 OS=Schizosaccharomyces pombe (strain 972 / ATCC 24843) GN=qcr6 PE=3 SV=1
PH560_02745-RB	XP_003328979.1/2.0e-50/hypothetical protein PGTG_10719 [Puccinia graminis f. sp. tritici CRL 75-36-700-3]	sp|O42932|QCR6_SCHPO/2.2e-14/Cytochrome b-c1 complex subunit 6 OS=Schizosaccharomyces pombe (strain 972 / ATCC 24843) GN=qcr6 PE=3 SV=1
PH560_02751-RA	XP_003338519.1/6.4e-28/hypothetical protein PGTG_20063 [Puccinia graminis f. sp. tritici CRL 75-36-700-3]	NA
PH560_02743-RB	KNZ49796.1/3.4e-58/uncharacterized protein VP01_4783g1, partial [Puccinia sorghi]	NA
PH560_02743-RC	KNZ49796.1/3.7e-44/uncharacterized protein VP01_4783g1, partial [Puccinia sorghi]	NA
PH560_02743-RA	NA	NA
PH560_02741-RA	NA	NA
PH560_20217-RC	OAV92524.1/0.0e+00/hypothetical protein, variant 2 [Puccinia triticina 1-1 BBBD Race 1]	sp|Q09771|ATF31_SCHPO/4.7e-08/Transcription factor atf31 OS=Schizosaccharomyces pombe (strain 972 / ATCC 24843) GN=atf31 PE=3 SV=1
PH560_20217-RA	OAV92524.1/0.0e+00/hypothetical protein, variant 2 [Puccinia triticina 1-1 BBBD Race 1]	NA
PH560_20217-RB	OAV92523.1/0.0e+00/hypothetical protein, variant 1 [Puccinia triticina 1-1 BBBD Race 1]	NA
PH560_20224-RB	XP_003333094.2/1.2e-251/hypothetical protein PGTG_14641 [Puccinia graminis f. sp. tritici CRL 75-36-700-3]	NA
PH560_20224-RA	XP_003333094.2/3.1e-263/hypothetical protein PGTG_14641 [Puccinia graminis f. sp. tritici CRL 75-36-700-3]	NA
PH560_20224-RC	XP_003333094.2/3.1e-263/hypothetical protein PGTG_14641 [Puccinia graminis f. sp. tritici CRL 75-36-700-3]	NA
PH560_20224-RD	XP_003333094.2/4.9e-261/hypothetical protein PGTG_14641 [Puccinia graminis f. sp. tritici CRL 75-36-700-3]	NA
PH560_20224-RE	XP_003333094.2/6.3e-261/hypothetical protein PGTG_14641 [Puccinia graminis f. sp. tritici CRL 75-36-700-3]	NA
PH560_20224-RF	XP_003333094.2/1.0e-258/hypothetical protein PGTG_14641 [Puccinia graminis f. sp. tritici CRL 75-36-700-3]	NA
PH560_20224-RG	XP_003333094.2/7.6e-173/hypothetical protein PGTG_14641 [Puccinia graminis f. sp. tritici CRL 75-36-700-3]	NA
PH560_20224-RH	XP_003336755.1/2.4e-131/hypothetical protein PGTG_18010 [Puccinia graminis f. sp. tritici CRL 75-36-700-3]	NA
PH560_20224-RI	XP_003336755.1/1.1e-81/hypothetical protein PGTG_18010 [Puccinia graminis f. sp. tritici CRL 75-36-700-3]	NA
PH560_20224-RJ	XP_003336755.1/2.9e-76/hypothetical protein PGTG_18010 [Puccinia graminis f. sp. tritici CRL 75-36-700-3]	NA
PH560_20230-RA	KNZ47082.1/3.0e-243/hypothetical protein VP01_66g14 [Puccinia sorghi]	sp|Q99337|YN12B_YEAST/2.8e-20/Transposon Ty1-NL2 Gag-Pol polyprotein OS=Saccharomyces cerevisiae (strain ATCC 204508 / S288c) GN=TY1B-NL2 PE=3 SV=1
PH560_20230-RB	KNZ47082.1/3.6e-181/hypothetical protein VP01_66g14 [Puccinia sorghi]	sp|Q12491|YB21B_YEAST/5.9e-19/Transposon Ty2-B Gag-Pol polyprotein OS=Saccharomyces cerevisiae (strain ATCC 204508 / S288c) GN=TY2B-B PE=3 SV=1
PH560_20230-RC	KNZ60563.1/4.3e-183/hypothetical protein VP01_1536g6 [Puccinia sorghi]	sp|Q99337|YN12B_YEAST/2.0e-20/Transposon Ty1-NL2 Gag-Pol polyprotein OS=Saccharomyces cerevisiae (strain ATCC 204508 / S288c) GN=TY1B-NL2 PE=3 SV=1
PH560_20234-RD	XP_003336274.2/2.3e-285/L-ascorbate oxidase [Puccinia graminis f. sp. tritici CRL 75-36-700-3]	sp|I1RF64|AURL2_GIBZE/1.4e-90/Multicopper oxidase aurL2 OS=Gibberella zeae (strain PH-1 / ATCC MYA-4620 / FGSC 9075 / NRRL 31084) GN=aurL2 PE=2 SV=1
PH560_20234-RC	XP_003336274.2/8.0e-244/L-ascorbate oxidase [Puccinia graminis f. sp. tritici CRL 75-36-700-3]	sp|I1RF64|AURL2_GIBZE/3.3e-77/Multicopper oxidase aurL2 OS=Gibberella zeae (strain PH-1 / ATCC MYA-4620 / FGSC 9075 / NRRL 31084) GN=aurL2 PE=2 SV=1
PH560_20234-RB	XP_003336274.2/1.9e-220/L-ascorbate oxidase [Puccinia graminis f. sp. tritici CRL 75-36-700-3]	sp|I1RF64|AURL2_GIBZE/2.3e-61/Multicopper oxidase aurL2 OS=Gibberella zeae (strain PH-1 / ATCC MYA-4620 / FGSC 9075 / NRRL 31084) GN=aurL2 PE=2 SV=1
PH560_20234-RA	OAV93412.1/2.3e-151/L-ascorbate oxidase [Puccinia triticina 1-1 BBBD Race 1]	sp|Q0D1P3|TERE_ASPTN/3.8e-34/Multicopper oxidase terE OS=Aspergillus terreus (strain NIH 2624 / FGSC A1156) GN=terE PE=1 SV=1
PH560_20233-RB	XP_003336273.2/1.5e-248/hypothetical protein PGTG_18048 [Puccinia graminis f. sp. tritici CRL 75-36-700-3]	sp|G3XMC9|AZAK_ASPNA/9.1e-41/Efflux pump azaL OS=Aspergillus niger (strain ATCC 1015 / CBS 113.46 / FGSC A1144 / LSHB Ac4 / NCTC 3858a / NRRL 328 / USDA 3528.7) GN=azaL PE=2 SV=1
PH560_20233-RD	XP_003336273.2/6.9e-232/hypothetical protein PGTG_18048 [Puccinia graminis f. sp. tritici CRL 75-36-700-3]	sp|G3XMC9|AZAK_ASPNA/6.6e-38/Efflux pump azaL OS=Aspergillus niger (strain ATCC 1015 / CBS 113.46 / FGSC A1144 / LSHB Ac4 / NCTC 3858a / NRRL 328 / USDA 3528.7) GN=azaL PE=2 SV=1
PH560_20233-RC	OAV92529.1/1.7e-218/hypothetical protein PTTG_03492 [Puccinia triticina 1-1 BBBD Race 1]	sp|G3XMC9|AZAK_ASPNA/7.2e-36/Efflux pump azaL OS=Aspergillus niger (strain ATCC 1015 / CBS 113.46 / FGSC A1144 / LSHB Ac4 / NCTC 3858a / NRRL 328 / USDA 3528.7) GN=azaL PE=2 SV=1
PH560_20233-RA	OAV92530.1/1.3e-232/hypothetical protein, variant 1 [Puccinia triticina 1-1 BBBD Race 1]	sp|G3XMC9|AZAK_ASPNA/2.9e-38/Efflux pump azaL OS=Aspergillus niger (strain ATCC 1015 / CBS 113.46 / FGSC A1144 / LSHB Ac4 / NCTC 3858a / NRRL 328 / USDA 3528.7) GN=azaL PE=2 SV=1
PH560_20233-RE	XP_003336273.2/1.9e-218/hypothetical protein PGTG_18048 [Puccinia graminis f. sp. tritici CRL 75-36-700-3]	sp|G3XMC9|AZAK_ASPNA/1.7e-30/Efflux pump azaL OS=Aspergillus niger (strain ATCC 1015 / CBS 113.46 / FGSC A1144 / LSHB Ac4 / NCTC 3858a / NRRL 328 / USDA 3528.7) GN=azaL PE=2 SV=1
PH560_20218-RC	KNE89403.1/3.9e-125/hypothetical protein PSTG_17144 [Puccinia striiformis f. sp. tritici PST-78]	NA
PH560_20218-RB	KNE89403.1/1.5e-94/hypothetical protein PSTG_17144 [Puccinia striiformis f. sp. tritici PST-78]	NA
PH560_20218-RA	KNE89403.1/4.8e-97/hypothetical protein PSTG_17144 [Puccinia striiformis f. sp. tritici PST-78]	NA
PH560_20236-RB	KNF01522.1/8.2e-67/hypothetical protein PSTG_05302 [Puccinia striiformis f. sp. tritici PST-78]	NA
PH560_20236-RA	KNF01522.1/3.0e-78/hypothetical protein PSTG_05302 [Puccinia striiformis f. sp. tritici PST-78]	NA
PH560_20215-RA	OAV88325.1/7.0e-55/hypothetical protein PTTG_07583 [Puccinia triticina 1-1 BBBD Race 1]	NA
PH560_20215-RB	OAV88325.1/3.7e-45/hypothetical protein PTTG_07583 [Puccinia triticina 1-1 BBBD Race 1]	NA
PH560_20215-RC	OAV88325.1/4.6e-53/hypothetical protein PTTG_07583 [Puccinia triticina 1-1 BBBD Race 1]	NA
PH560_20215-RD	OAV88325.1/1.7e-39/hypothetical protein PTTG_07583 [Puccinia triticina 1-1 BBBD Race 1]	NA
PH560_20215-RE	KNZ62471.1/1.4e-06/hypothetical protein VP01_1266g6 [Puccinia sorghi]	NA
PH560_20214-RA	OAV92521.1/2.6e-142/hypothetical protein PTTG_12060 [Puccinia triticina 1-1 BBBD Race 1]	sp|Q9UTA5|TYW3_SCHPO/1.7e-18/tRNA wybutosine-synthesizing protein 3 OS=Schizosaccharomyces pombe (strain 972 / ATCC 24843) GN=tyw3 PE=3 SV=1
PH560_20219-RC	KNZ64472.1/5.7e-118/uncharacterized protein VP01_1024g3 [Puccinia sorghi]	NA
PH560_20219-RB	KNZ64472.1/5.0e-125/uncharacterized protein VP01_1024g3 [Puccinia sorghi]	NA
PH560_20219-RA	KNZ64472.1/4.8e-73/uncharacterized protein VP01_1024g3 [Puccinia sorghi]	NA
PH560_20226-RB	XP_003889441.1/1.1e-86/hypothetical protein PGTG_21854 [Puccinia graminis f. sp. tritici CRL 75-36-700-3]	NA
PH560_20226-RA	OAV91820.1/6.3e-89/hypothetical protein PTTG_27858 [Puccinia triticina 1-1 BBBD Race 1]	NA
PH560_20216-RD	KNE97466.1/1.6e-67/hypothetical protein PSTG_09300 [Puccinia striiformis f. sp. tritici PST-78]	NA
PH560_20216-RC	KNE97466.1/3.7e-75/hypothetical protein PSTG_09300 [Puccinia striiformis f. sp. tritici PST-78]	NA
PH560_20216-RB	KNE92679.1/8.3e-68/hypothetical protein PSTG_13892 [Puccinia striiformis f. sp. tritici PST-78]	NA
PH560_20216-RA	KNE97466.1/5.7e-56/hypothetical protein PSTG_09300 [Puccinia striiformis f. sp. tritici PST-78]	NA
PH560_20216-RF	KNF05405.1/5.7e-19/hypothetical protein PSTG_01620 [Puccinia striiformis f. sp. tritici PST-78]	NA
PH560_20216-RE	KNZ59273.1/2.6e-14/uncharacterized protein VP01_176g4 [Puccinia sorghi]	NA
PH560_20211-RA	KNZ64620.1/4.7e-61/hypothetical protein VP01_100g14 [Puccinia sorghi]	NA
PH560_20211-RB	KNZ64620.1/1.8e-45/hypothetical protein VP01_100g14 [Puccinia sorghi]	NA
PH560_20211-RC	KNZ64620.1/5.0e-44/hypothetical protein VP01_100g14 [Puccinia sorghi]	NA
PH560_20211-RD	KNZ64620.1/2.1e-25/hypothetical protein VP01_100g14 [Puccinia sorghi]	NA
PH560_20212-RD	KNZ55872.1/2.6e-77/uncharacterized protein VP01_2559g1 [Puccinia sorghi]	NA
PH560_20212-RA	KNZ55872.1/2.5e-114/uncharacterized protein VP01_2559g1 [Puccinia sorghi]	NA
PH560_20212-RC	KNZ55872.1/6.1e-105/uncharacterized protein VP01_2559g1 [Puccinia sorghi]	NA
PH560_20212-RG	KNZ64618.1/6.4e-78/uncharacterized protein VP01_100g12 [Puccinia sorghi]	NA
PH560_20212-RB	KNZ55872.1/2.2e-113/uncharacterized protein VP01_2559g1 [Puccinia sorghi]	NA
PH560_20212-RE	KNZ55872.1/4.0e-112/uncharacterized protein VP01_2559g1 [Puccinia sorghi]	NA
PH560_20212-RF	KNZ55872.1/2.1e-96/uncharacterized protein VP01_2559g1 [Puccinia sorghi]	NA
PH560_20212-RH	KNZ55872.1/4.3e-94/uncharacterized protein VP01_2559g1 [Puccinia sorghi]	NA
PH560_20237-RB	OAV93410.1/1.9e-69/hypothetical protein PTTG_27337 [Puccinia triticina 1-1 BBBD Race 1]	NA
PH560_20237-RA	OAV93411.1/1.2e-55/hypothetical protein PTTG_27338 [Puccinia triticina 1-1 BBBD Race 1]	NA
PH560_20213-RA	OAV92520.1/7.8e-50/hypothetical protein PTTG_03489 [Puccinia triticina 1-1 BBBD Race 1]	NA
PH560_20213-RB	OAV92520.1/4.1e-35/hypothetical protein PTTG_03489 [Puccinia triticina 1-1 BBBD Race 1]	NA
PH560_20232-RA	XP_003325666.2/1.0e-30/hypothetical protein PGTG_06868 [Puccinia graminis f. sp. tritici CRL 75-36-700-3]	NA
PH560_20231-RA	OAV84819.1/6.9e-43/hypothetical protein PTTG_31032, partial [Puccinia triticina 1-1 BBBD Race 1]	NA
PH560_20225-RA	OAV98661.1/1.3e-48/hypothetical protein PTTG_25613 [Puccinia triticina 1-1 BBBD Race 1]	sp|C8VTR5|PAM17_EMENI/2.2e-18/Presequence translocated-associated motor subunit pam17, mitochondrial OS=Emericella nidulans (strain FGSC A4 / ATCC 38163 / CBS 112.46 / NRRL 194 / M139) GN=pam17 PE=3 SV=1
PH560_20235-RA	KNF04191.1/5.1e-26/hypothetical protein PSTG_02543 [Puccinia striiformis f. sp. tritici PST-78]	NA
PH560_20220-RA	KNF05857.1/5.9e-51/hypothetical protein PSTG_00851 [Puccinia striiformis f. sp. tritici PST-78]	NA
PH560_20220-RB	KNZ46063.1/1.8e-56/uncharacterized protein VP01_7592g1, partial [Puccinia sorghi]	NA
PH560_20227-RB	KNE94165.1/2.4e-41/hypothetical protein PSTG_12495 [Puccinia striiformis f. sp. tritici PST-78]	NA
PH560_20227-RA	KNZ47540.1/7.7e-33/hypothetical protein VP01_6326g1 [Puccinia sorghi]	NA
PH560_20229-RA	KNZ47593.1/2.0e-34/uncharacterized protein VP01_629g8 [Puccinia sorghi]	NA
PH560_20221-RA	KNE98634.1/2.7e-20/hypothetical protein PSTG_08003, partial [Puccinia striiformis f. sp. tritici PST-78]	NA
PH560_20223-RA	XP_003889034.1/2.9e-13/hypothetical protein PGTG_22221 [Puccinia graminis f. sp. tritici CRL 75-36-700-3]	NA
PH560_20228-RA	XP_003326993.1/2.8e-14/hypothetical protein PGTG_08770 [Puccinia graminis f. sp. tritici CRL 75-36-700-3]	NA
PH560_20228-RB	XP_003336512.1/4.0e-06/hypothetical protein PGTG_18183 [Puccinia graminis f. sp. tritici CRL 75-36-700-3]	NA
PH560_20210-RA	XP_003336292.1/7.0e-25/V-type H+-transporting ATPase subunit D [Puccinia graminis f. sp. tritici CRL 75-36-700-3]	sp|O59941|VATD_NEUCR/1.0e-12/V-type proton ATPase subunit D OS=Neurospora crassa (strain ATCC 24698 / 74-OR23-1A / CBS 708.71 / DSM 1257 / FGSC 987) GN=vma-8 PE=2 SV=2
PH560_20222-RA	KNZ48657.1/1.5e-10/uncharacterized protein VP01_5506g1 [Puccinia sorghi]	NA
PH560_21568-RA	OAV85547.1/3.1e-123/hypothetical protein PTTG_30442, partial [Puccinia triticina 1-1 BBBD Race 1]	sp|P47024|YJ41B_YEAST/5.8e-10/Transposon Ty4-J Gag-Pol polyprotein OS=Saccharomyces cerevisiae (strain ATCC 204508 / S288c) GN=TY4B-J PE=3 SV=3
PH560_21574-RE	KNZ55400.1/4.2e-294/hypothetical protein VP01_2694g2 [Puccinia sorghi]	sp|Q07163|TY1AB_YEASX/5.5e-25/Transposon TyH3 Gag-Pol polyprotein OS=Saccharomyces cerevisiae GN=TY1B PE=1 SV=2
PH560_21574-RB	KNZ55400.1/0.0e+00/hypothetical protein VP01_2694g2 [Puccinia sorghi]	sp|Q12269|YG12B_YEAST/9.9e-27/Transposon Ty1-GR2 Gag-Pol polyprotein OS=Saccharomyces cerevisiae (strain ATCC 204508 / S288c) GN=TY1B-GR2 PE=3 SV=3
PH560_21574-RF	KNZ55400.1/2.9e-295/hypothetical protein VP01_2694g2 [Puccinia sorghi]	sp|Q07163|TY1AB_YEASX/5.6e-25/Transposon TyH3 Gag-Pol polyprotein OS=Saccharomyces cerevisiae GN=TY1B PE=1 SV=2
PH560_21574-RD	KNZ62523.1/0.0e+00/hypothetical protein VP01_125g8 [Puccinia sorghi]	sp|Q12269|YG12B_YEAST/1.6e-26/Transposon Ty1-GR2 Gag-Pol polyprotein OS=Saccharomyces cerevisiae (strain ATCC 204508 / S288c) GN=TY1B-GR2 PE=3 SV=3
PH560_21574-RG	KNZ55400.1/0.0e+00/hypothetical protein VP01_2694g2 [Puccinia sorghi]	sp|P0C2I5|YL12B_YEAST/3.3e-25/Transposon Ty1-LR2 Gag-Pol polyprotein OS=Saccharomyces cerevisiae (strain ATCC 204508 / S288c) GN=TY1B-LR2 PE=3 SV=1
PH560_21574-RI	KNZ55400.1/1.6e-250/hypothetical protein VP01_2694g2 [Puccinia sorghi]	sp|Q07163|TY1AB_YEASX/4.1e-25/Transposon TyH3 Gag-Pol polyprotein OS=Saccharomyces cerevisiae GN=TY1B PE=1 SV=2
PH560_21574-RA	KNZ62523.1/0.0e+00/hypothetical protein VP01_125g8 [Puccinia sorghi]	sp|Q03855|YD11B_YEAST/1.8e-26/Transposon Ty1-DR1 Gag-Pol polyprotein OS=Saccharomyces cerevisiae (strain ATCC 204508 / S288c) GN=TY1B-DR1 PE=3 SV=2
PH560_21574-RC	KNZ62523.1/0.0e+00/hypothetical protein VP01_125g8 [Puccinia sorghi]	sp|Q03855|YD11B_YEAST/1.6e-26/Transposon Ty1-DR1 Gag-Pol polyprotein OS=Saccharomyces cerevisiae (strain ATCC 204508 / S288c) GN=TY1B-DR1 PE=3 SV=2
PH560_21574-RH	KNZ55400.1/1.8e-304/hypothetical protein VP01_2694g2 [Puccinia sorghi]	sp|Q07163|TY1AB_YEASX/4.9e-25/Transposon TyH3 Gag-Pol polyprotein OS=Saccharomyces cerevisiae GN=TY1B PE=1 SV=2
PH560_21574-RJ	KNZ55400.1/2.5e-251/hypothetical protein VP01_2694g2 [Puccinia sorghi]	sp|Q07163|TY1AB_YEASX/4.2e-25/Transposon TyH3 Gag-Pol polyprotein OS=Saccharomyces cerevisiae GN=TY1B PE=1 SV=2
PH560_21574-RK	KNZ53367.1/1.8e-123/hypothetical protein VP01_3263g3 [Puccinia sorghi]	sp|P47024|YJ41B_YEAST/2.5e-08/Transposon Ty4-J Gag-Pol polyprotein OS=Saccharomyces cerevisiae (strain ATCC 204508 / S288c) GN=TY4B-J PE=3 SV=3
PH560_21574-RL	KNZ54006.1/6.3e-46/hypothetical protein VP01_3079g1 [Puccinia sorghi]	NA
PH560_21575-RD	OAV85547.1/3.7e-138/hypothetical protein PTTG_30442, partial [Puccinia triticina 1-1 BBBD Race 1]	sp|Q07791|YD23B_YEAST/2.8e-21/Transposon Ty2-DR3 Gag-Pol polyprotein OS=Saccharomyces cerevisiae (strain ATCC 204508 / S288c) GN=TY2B-DR3 PE=3 SV=1
PH560_21575-RB	KNZ59814.1/6.6e-113/uncharacterized protein VP01_1659g5 [Puccinia sorghi]	sp|Q12491|YB21B_YEAST/1.2e-23/Transposon Ty2-B Gag-Pol polyprotein OS=Saccharomyces cerevisiae (strain ATCC 204508 / S288c) GN=TY2B-B PE=3 SV=1
PH560_21575-RA	OAV85547.1/1.7e-206/hypothetical protein PTTG_30442, partial [Puccinia triticina 1-1 BBBD Race 1]	sp|P0CX64|YG22B_YEAST/1.5e-23/Transposon Ty2-GR2 Gag-Pol polyprotein OS=Saccharomyces cerevisiae (strain ATCC 204508 / S288c) GN=TY2B-GR2 PE=3 SV=1
PH560_21575-RC	OAV85547.1/1.1e-142/hypothetical protein PTTG_30442, partial [Puccinia triticina 1-1 BBBD Race 1]	sp|P0CX64|YG22B_YEAST/1.3e-23/Transposon Ty2-GR2 Gag-Pol polyprotein OS=Saccharomyces cerevisiae (strain ATCC 204508 / S288c) GN=TY2B-GR2 PE=3 SV=1
PH560_21577-RG	XP_003323754.2/6.8e-186/hypothetical protein PGTG_05656 [Puccinia graminis f. sp. tritici CRL 75-36-700-3]	NA
PH560_21577-RH	XP_003323754.2/3.4e-245/hypothetical protein PGTG_05656 [Puccinia graminis f. sp. tritici CRL 75-36-700-3]	NA
PH560_21577-RC	KNE97617.1/3.8e-150/hypothetical protein PSTG_09166 [Puccinia striiformis f. sp. tritici PST-78]	NA
PH560_21577-RI	OAV98871.1/9.3e-141/hypothetical protein PTTG_25544 [Puccinia triticina 1-1 BBBD Race 1]	NA
PH560_21577-RB	KNE97617.1/1.8e-81/hypothetical protein PSTG_09166 [Puccinia striiformis f. sp. tritici PST-78]	NA
PH560_21577-RF	XP_003323754.2/1.8e-228/hypothetical protein PGTG_05656 [Puccinia graminis f. sp. tritici CRL 75-36-700-3]	NA
PH560_21577-RE	XP_003323754.2/1.0e-203/hypothetical protein PGTG_05656 [Puccinia graminis f. sp. tritici CRL 75-36-700-3]	NA
PH560_21577-RD	KNE97617.1/8.7e-161/hypothetical protein PSTG_09166 [Puccinia striiformis f. sp. tritici PST-78]	NA
PH560_21577-RA	KNE97617.1/8.4e-87/hypothetical protein PSTG_09166 [Puccinia striiformis f. sp. tritici PST-78]	NA
PH560_21577-RJ	NA	NA
PH560_21565-RA	XP_003335784.2/0.0e+00/hypothetical protein PGTG_17019 [Puccinia graminis f. sp. tritici CRL 75-36-700-3]	sp|Q6FLF3|DBP2_CANGA/9.8e-82/ATP-dependent RNA helicase DBP2 OS=Candida glabrata (strain ATCC 2001 / CBS 138 / JCM 3761 / NBRC 0622 / NRRL Y-65) GN=DBP2 PE=3 SV=1
PH560_21565-RB	XP_003335784.2/2.5e-62/hypothetical protein PGTG_17019 [Puccinia graminis f. sp. tritici CRL 75-36-700-3]	sp|A5DDF4|PRP5_PICGU/6.0e-21/Pre-mRNA-processing ATP-dependent RNA helicase PRP5 OS=Meyerozyma guilliermondii (strain ATCC 6260 / CBS 566 / DSM 6381 / JCM 1539 / NBRC 10279 / NRRL Y-324) GN=PRP5 PE=3 SV=2
PH560_21576-RA	XP_003889256.1/8.2e-86/hypothetical protein PGTG_22034 [Puccinia graminis f. sp. tritici CRL 75-36-700-3]	NA
PH560_21569-RB	OAV97115.1/1.0e-236/phosphoglycerate kinase [Puccinia triticina 1-1 BBBD Race 1]	sp|P29407|PGK_YARLI/1.7e-167/Phosphoglycerate kinase OS=Yarrowia lipolytica (strain CLIB 122 / E 150) GN=PGK1 PE=3 SV=1
PH560_21569-RC	OAV90695.1/1.8e-97/phosphoglycerate kinase [Puccinia triticina 1-1 BBBD Race 1]	sp|P29407|PGK_YARLI/1.2e-74/Phosphoglycerate kinase OS=Yarrowia lipolytica (strain CLIB 122 / E 150) GN=PGK1 PE=3 SV=1
PH560_21569-RA	OAV97115.1/6.2e-125/phosphoglycerate kinase [Puccinia triticina 1-1 BBBD Race 1]	sp|P29407|PGK_YARLI/7.4e-83/Phosphoglycerate kinase OS=Yarrowia lipolytica (strain CLIB 122 / E 150) GN=PGK1 PE=3 SV=1
PH560_21572-RA	KNZ52985.1/1.9e-94/hypothetical protein VP01_337g12 [Puccinia sorghi]	NA
PH560_21573-RA	XP_003338497.1/5.7e-59/hypothetical protein PGTG_19981 [Puccinia graminis f. sp. tritici CRL 75-36-700-3]	NA
PH560_21573-RB	XP_003326405.2/1.6e-14/hypothetical protein PGTG_08235 [Puccinia graminis f. sp. tritici CRL 75-36-700-3]	NA
PH560_21566-RA	OAV97449.1/1.6e-72/hypothetical protein PTTG_00174 [Puccinia triticina 1-1 BBBD Race 1]	NA
PH560_21580-RA	KNE88595.1/5.5e-69/hypothetical protein PSTG_17987 [Puccinia striiformis f. sp. tritici PST-78]	NA
PH560_21581-RA	XP_003889256.1/5.9e-52/hypothetical protein PGTG_22034 [Puccinia graminis f. sp. tritici CRL 75-36-700-3]	sp|Q2HEW5|CHG2_CHAGB/6.2e-06/PKS-NRPS hybrid synthetase CHGG_01239 OS=Chaetomium globosum (strain ATCC 6205 / CBS 148.51 / DSM 1962 / NBRC 6347 / NRRL 1970) GN=CHGG_01239 PE=3 SV=1
PH560_21563-RA	XP_003889967.1/1.8e-39/hypothetical protein PGTG_21436 [Puccinia graminis f. sp. tritici CRL 75-36-700-3]	NA
PH560_21564-RA	KNE88595.1/3.2e-51/hypothetical protein PSTG_17987 [Puccinia striiformis f. sp. tritici PST-78]	NA
PH560_21571-RA	KNZ52065.1/9.7e-34/hypothetical protein VP01_3706g2, partial [Puccinia sorghi]	NA
PH560_21567-RA	OAV97450.1/1.2e-62/hypothetical protein PTTG_00175 [Puccinia triticina 1-1 BBBD Race 1]	sp|O13929|YF69_SCHPO/2.5e-17/Uncharacterized protein C23C4.09c OS=Schizosaccharomyces pombe (strain 972 / ATCC 24843) GN=SPAC23C4.09c PE=3 SV=1
PH560_21579-RA	KNZ57876.1/4.2e-11/hypothetical protein VP01_204g1 [Puccinia sorghi]	NA
PH560_21570-RA	KNZ52066.1/1.9e-29/hypothetical protein VP01_3705g1 [Puccinia sorghi]	NA
PH560_21578-RA	KNE91264.1/7.9e-20/hypothetical protein PSTG_15329 [Puccinia striiformis f. sp. tritici PST-78]	NA
PH560_21578-RB	KNE91264.1/1.0e-19/hypothetical protein PSTG_15329 [Puccinia striiformis f. sp. tritici PST-78]	NA
PH560_19070-RA	XP_003319248.2/1.4e-250/seryl-tRNA synthetase [Puccinia graminis f. sp. tritici CRL 75-36-700-3]	sp|O14018|SYSC_SCHPO/7.4e-153/Serine--tRNA ligase, cytoplasmic OS=Schizosaccharomyces pombe (strain 972 / ATCC 24843) GN=SPAC29A4.15 PE=3 SV=1
PH560_19070-RB	OAV98101.1/7.8e-207/hypothetical protein PTTG_01189 [Puccinia triticina 1-1 BBBD Race 1]	sp|O14018|SYSC_SCHPO/8.3e-113/Serine--tRNA ligase, cytoplasmic OS=Schizosaccharomyces pombe (strain 972 / ATCC 24843) GN=SPAC29A4.15 PE=3 SV=1
PH560_19068-RA	OAV98096.1/1.6e-248/hypothetical protein PTTG_01191 [Puccinia triticina 1-1 BBBD Race 1]	sp|Q12463|TRM11_YEAST/1.5e-65/tRNA (guanine(10)-N2)-methyltransferase OS=Saccharomyces cerevisiae (strain ATCC 204508 / S288c) GN=TRM11 PE=1 SV=1
PH560_19069-RA	OAV93890.1/9.3e-177/hypothetical protein PTTG_27135 [Puccinia triticina 1-1 BBBD Race 1]	NA
PH560_19072-RA	KNE96180.1/1.1e-147/hypothetical protein PSTG_10595 [Puccinia striiformis f. sp. tritici PST-78]	NA
PH560_19072-RB	KNE89024.1/1.8e-129/hypothetical protein PSTG_17519, partial [Puccinia striiformis f. sp. tritici PST-78]	NA
PH560_19059-RA	XP_003337909.2/2.1e-129/hypothetical protein PGTG_19466 [Puccinia graminis f. sp. tritici CRL 75-36-700-3]	NA
PH560_19059-RB	XP_003337909.2/3.6e-73/hypothetical protein PGTG_19466 [Puccinia graminis f. sp. tritici CRL 75-36-700-3]	NA
PH560_19059-RC	XP_003337909.2/1.0e-56/hypothetical protein PGTG_19466 [Puccinia graminis f. sp. tritici CRL 75-36-700-3]	NA
PH560_19065-RA	NA	NA
PH560_19065-RB	OAV86427.1/3.8e-42/hypothetical protein PTTG_29913, partial [Puccinia triticina 1-1 BBBD Race 1]	NA
PH560_19073-RB	KNF00862.1/1.7e-74/hypothetical protein PSTG_05997 [Puccinia striiformis f. sp. tritici PST-78]	NA
PH560_19073-RA	KNF00862.1/2.6e-84/hypothetical protein PSTG_05997 [Puccinia striiformis f. sp. tritici PST-78]	NA
PH560_19073-RC	KNF00862.1/1.7e-71/hypothetical protein PSTG_05997 [Puccinia striiformis f. sp. tritici PST-78]	NA
PH560_19062-RA	OAV98668.1/1.1e-44/hypothetical protein PTTG_25616 [Puccinia triticina 1-1 BBBD Race 1]	NA
PH560_19062-RB	XP_003325045.2/1.1e-30/hypothetical protein PGTG_06582 [Puccinia graminis f. sp. tritici CRL 75-36-700-3]	NA
PH560_19066-RB	KNE95324.1/1.6e-40/hypothetical protein PSTG_11403 [Puccinia striiformis f. sp. tritici PST-78]	NA
PH560_19066-RA	KNE95324.1/5.3e-22/hypothetical protein PSTG_11403 [Puccinia striiformis f. sp. tritici PST-78]	NA
PH560_19071-RA	XP_003319246.1/7.4e-84/small COPII coat GTPase [Puccinia graminis f. sp. tritici CRL 75-36-700-3]	sp|Q4P0I7|SAR1_USTMA/4.2e-76/Small COPII coat GTPase SAR1 OS=Ustilago maydis (strain 521 / FGSC 9021) GN=SAR1 PE=3 SV=1
PH560_19063-RA	XP_003888514.1/1.5e-44/hypothetical protein PGTG_22720 [Puccinia graminis f. sp. tritici CRL 75-36-700-3]	NA
PH560_19063-RB	NA	NA
PH560_19061-RA	OAV91779.1/6.2e-25/hypothetical protein PTTG_27879 [Puccinia triticina 1-1 BBBD Race 1]	NA
PH560_19061-RB	KNE94873.1/3.3e-30/hypothetical protein PSTG_11777 [Puccinia striiformis f. sp. tritici PST-78]	NA
PH560_19060-RA	KNE94872.1/3.2e-15/hypothetical protein PSTG_11776 [Puccinia striiformis f. sp. tritici PST-78]	NA
PH560_19064-RA	XP_003329560.2/2.5e-07/hypothetical protein PGTG_11310 [Puccinia graminis f. sp. tritici CRL 75-36-700-3]	NA
PH560_19082-RA	KNZ49407.1/5.8e-152/uncharacterized protein VP01_502g3 [Puccinia sorghi]	NA
PH560_19078-RA	OAV98112.1/1.3e-81/hypothetical protein PTTG_25803 [Puccinia triticina 1-1 BBBD Race 1]	NA
PH560_19090-RA	KNE89452.1/3.4e-89/hypothetical protein PSTG_17093 [Puccinia striiformis f. sp. tritici PST-78]	NA
PH560_19084-RD	KNZ48807.1/2.0e-82/uncharacterized protein VP01_53g5 [Puccinia sorghi]	NA
PH560_19084-RC	KNZ48807.1/6.2e-84/uncharacterized protein VP01_53g5 [Puccinia sorghi]	NA
PH560_19084-RB	KNZ48807.1/3.6e-67/uncharacterized protein VP01_53g5 [Puccinia sorghi]	NA
PH560_19084-RA	KNZ50978.1/6.7e-23/uncharacterized protein VP01_4147g1 [Puccinia sorghi]	NA
PH560_19084-RE	KNZ56310.1/6.9e-39/uncharacterized protein VP01_2437g1, partial [Puccinia sorghi]	NA
PH560_19083-RA	EUC53577.1/6.6e-70/Transposon Tf2-1 polyprotein, putative [Rhizoctonia solani AG-3 Rhs1AP]	sp|P0CT41|TF212_SCHPO/3.8e-38/Transposon Tf2-12 polyprotein OS=Schizosaccharomyces pombe (strain 972 / ATCC 24843) GN=Tf2-12 PE=3 SV=1
PH560_19083-RB	EUC53577.1/1.1e-73/Transposon Tf2-1 polyprotein, putative [Rhizoctonia solani AG-3 Rhs1AP]	sp|P0CT41|TF212_SCHPO/6.8e-41/Transposon Tf2-12 polyprotein OS=Schizosaccharomyces pombe (strain 972 / ATCC 24843) GN=Tf2-12 PE=3 SV=1
PH560_19085-RE	KNE90540.1/3.7e-70/hypothetical protein PSTG_16002 [Puccinia striiformis f. sp. tritici PST-78]	NA
PH560_19085-RG	OAV92274.1/1.4e-66/hypothetical protein PTTG_27680 [Puccinia triticina 1-1 BBBD Race 1]	NA
PH560_19085-RD	KNE90540.1/1.8e-39/hypothetical protein PSTG_16002 [Puccinia striiformis f. sp. tritici PST-78]	NA
PH560_19085-RI	OAV92274.1/3.5e-51/hypothetical protein PTTG_27680 [Puccinia triticina 1-1 BBBD Race 1]	NA
PH560_19085-RC	KNE90540.1/1.4e-27/hypothetical protein PSTG_16002 [Puccinia striiformis f. sp. tritici PST-78]	NA
PH560_19085-RH	OAV92274.1/1.2e-19/hypothetical protein PTTG_27680 [Puccinia triticina 1-1 BBBD Race 1]	NA
PH560_19085-RB	KNE90540.1/9.4e-22/hypothetical protein PSTG_16002 [Puccinia striiformis f. sp. tritici PST-78]	NA
PH560_19085-RF	KNE90540.1/2.7e-06/hypothetical protein PSTG_16002 [Puccinia striiformis f. sp. tritici PST-78]	NA
PH560_19085-RA	OAV93458.1/1.1e-07/hypothetical protein PTTG_27352 [Puccinia triticina 1-1 BBBD Race 1]	NA
PH560_19080-RA	KNE88595.1/1.3e-70/hypothetical protein PSTG_17987 [Puccinia striiformis f. sp. tritici PST-78]	NA
PH560_19075-RA	OAV98110.1/5.8e-44/hypothetical protein PTTG_01183 [Puccinia triticina 1-1 BBBD Race 1]	NA
PH560_19074-RA	KNE91264.1/3.3e-45/hypothetical protein PSTG_15329 [Puccinia striiformis f. sp. tritici PST-78]	NA
PH560_19074-RD	KNE91264.1/2.2e-78/hypothetical protein PSTG_15329 [Puccinia striiformis f. sp. tritici PST-78]	NA
PH560_19074-RC	KNE91264.1/1.1e-46/hypothetical protein PSTG_15329 [Puccinia striiformis f. sp. tritici PST-78]	NA
PH560_19074-RB	KNE91264.1/3.7e-45/hypothetical protein PSTG_15329 [Puccinia striiformis f. sp. tritici PST-78]	NA
PH560_19074-RG	KNE91264.1/8.8e-60/hypothetical protein PSTG_15329 [Puccinia striiformis f. sp. tritici PST-78]	NA
PH560_19074-RF	KNE91264.1/2.1e-32/hypothetical protein PSTG_15329 [Puccinia striiformis f. sp. tritici PST-78]	NA
PH560_19074-RE	KNE91264.1/7.0e-24/hypothetical protein PSTG_15329 [Puccinia striiformis f. sp. tritici PST-78]	NA
PH560_19086-RA	OAV90689.1/4.1e-34/hypothetical protein PTTG_06550 [Puccinia triticina 1-1 BBBD Race 1]	NA
PH560_19087-RA	KNZ60034.1/9.2e-33/hypothetical protein VP01_1622g1, partial [Puccinia sorghi]	NA
PH560_19087-RB	XP_003325252.2/5.0e-30/hypothetical protein PGTG_06789 [Puccinia graminis f. sp. tritici CRL 75-36-700-3]	NA
PH560_19087-RC	KNZ60034.1/6.2e-24/hypothetical protein VP01_1622g1, partial [Puccinia sorghi]	NA
PH560_19091-RA	KNE91264.1/1.5e-53/hypothetical protein PSTG_15329 [Puccinia striiformis f. sp. tritici PST-78]	NA
PH560_19091-RB	KNE91264.1/5.0e-29/hypothetical protein PSTG_15329 [Puccinia striiformis f. sp. tritici PST-78]	NA
PH560_19091-RC	KNE91264.1/1.6e-20/hypothetical protein PSTG_15329 [Puccinia striiformis f. sp. tritici PST-78]	NA
PH560_19076-RA	OAV98111.1/3.0e-46/hypothetical protein PTTG_01182 [Puccinia triticina 1-1 BBBD Race 1]	NA
PH560_19081-RA	KNZ49407.1/2.7e-23/uncharacterized protein VP01_502g3 [Puccinia sorghi]	sp|O74854|POF6_SCHPO/9.6e-10/F-box protein pof6 OS=Schizosaccharomyces pombe (strain 972 / ATCC 24843) GN=pof6 PE=1 SV=1
PH560_19079-RA	KNE93746.1/3.1e-15/hypothetical protein PSTG_12849 [Puccinia striiformis f. sp. tritici PST-78]	NA
PH560_19089-RA	KNZ61252.1/5.0e-38/hypothetical protein VP01_142g12 [Puccinia sorghi]	NA
PH560_19088-RA	KNE94872.1/5.3e-28/hypothetical protein PSTG_11776 [Puccinia striiformis f. sp. tritici PST-78]	NA
PH560_19077-RA	NA	NA
PH560_18939-RA	OAV89565.1/0.0e+00/hypothetical protein PTTG_04233 [Puccinia triticina 1-1 BBBD Race 1]	NA
PH560_18942-RB	KNZ55400.1/0.0e+00/hypothetical protein VP01_2694g2 [Puccinia sorghi]	sp|Q12193|YB12B_YEAST/1.5e-25/Transposon Ty1-BR Gag-Pol polyprotein OS=Saccharomyces cerevisiae (strain ATCC 204508 / S288c) GN=TY1B-BR PE=3 SV=1
PH560_18942-RA	KNZ47082.1/1.3e-184/hypothetical protein VP01_66g14 [Puccinia sorghi]	sp|Q12193|YB12B_YEAST/4.6e-17/Transposon Ty1-BR Gag-Pol polyprotein OS=Saccharomyces cerevisiae (strain ATCC 204508 / S288c) GN=TY1B-BR PE=3 SV=1
PH560_18942-RF	KNZ62523.1/0.0e+00/hypothetical protein VP01_125g8 [Puccinia sorghi]	sp|Q12193|YB12B_YEAST/2.6e-25/Transposon Ty1-BR Gag-Pol polyprotein OS=Saccharomyces cerevisiae (strain ATCC 204508 / S288c) GN=TY1B-BR PE=3 SV=1
PH560_18942-RE	KNZ62523.1/0.0e+00/hypothetical protein VP01_125g8 [Puccinia sorghi]	sp|Q12193|YB12B_YEAST/2.6e-25/Transposon Ty1-BR Gag-Pol polyprotein OS=Saccharomyces cerevisiae (strain ATCC 204508 / S288c) GN=TY1B-BR PE=3 SV=1
PH560_18942-RD	KNZ62523.1/0.0e+00/hypothetical protein VP01_125g8 [Puccinia sorghi]	sp|Q12193|YB12B_YEAST/2.5e-25/Transposon Ty1-BR Gag-Pol polyprotein OS=Saccharomyces cerevisiae (strain ATCC 204508 / S288c) GN=TY1B-BR PE=3 SV=1
PH560_18942-RC	KNZ55400.1/0.0e+00/hypothetical protein VP01_2694g2 [Puccinia sorghi]	sp|Q12193|YB12B_YEAST/2.3e-25/Transposon Ty1-BR Gag-Pol polyprotein OS=Saccharomyces cerevisiae (strain ATCC 204508 / S288c) GN=TY1B-BR PE=3 SV=1
PH560_18940-RD	OAV91874.1/7.6e-284/hypothetical protein PTTG_27834 [Puccinia triticina 1-1 BBBD Race 1]	NA
PH560_18940-RB	OAV89564.1/3.2e-279/hypothetical protein PTTG_04234 [Puccinia triticina 1-1 BBBD Race 1]	NA
PH560_18940-RA	OAV91874.1/2.8e-267/hypothetical protein PTTG_27834 [Puccinia triticina 1-1 BBBD Race 1]	NA
PH560_18940-RC	OAV91874.1/6.7e-280/hypothetical protein PTTG_27834 [Puccinia triticina 1-1 BBBD Race 1]	NA
PH560_18940-RE	OAV91874.1/1.4e-136/hypothetical protein PTTG_27834 [Puccinia triticina 1-1 BBBD Race 1]	NA
PH560_18940-RF	OAV91874.1/1.5e-126/hypothetical protein PTTG_27834 [Puccinia triticina 1-1 BBBD Race 1]	NA
PH560_18946-RA	OAV90595.1/1.7e-155/hypothetical protein PTTG_05045 [Puccinia triticina 1-1 BBBD Race 1]	sp|P40464|FLX1_YEAST/1.2e-41/Mitochondrial FAD carrier protein FLX1 OS=Saccharomyces cerevisiae (strain ATCC 204508 / S288c) GN=FLX1 PE=3 SV=1
PH560_18946-RB	OAV90595.1/2.5e-147/hypothetical protein PTTG_05045 [Puccinia triticina 1-1 BBBD Race 1]	sp|P40464|FLX1_YEAST/6.7e-44/Mitochondrial FAD carrier protein FLX1 OS=Saccharomyces cerevisiae (strain ATCC 204508 / S288c) GN=FLX1 PE=3 SV=1
PH560_18934-RA	OAV89566.1/1.5e-145/hypothetical protein PTTG_04232 [Puccinia triticina 1-1 BBBD Race 1]	NA
PH560_18937-RC	XP_003338410.1/3.9e-90/hypothetical protein PGTG_20007 [Puccinia graminis f. sp. tritici CRL 75-36-700-3]	NA
PH560_18937-RA	XP_003338410.1/1.7e-105/hypothetical protein PGTG_20007 [Puccinia graminis f. sp. tritici CRL 75-36-700-3]	NA
PH560_18937-RD	XP_003338410.1/9.1e-98/hypothetical protein PGTG_20007 [Puccinia graminis f. sp. tritici CRL 75-36-700-3]	NA
PH560_18937-RG	XP_003338410.1/1.7e-96/hypothetical protein PGTG_20007 [Puccinia graminis f. sp. tritici CRL 75-36-700-3]	NA
PH560_18937-RF	XP_003338410.1/9.0e-98/hypothetical protein PGTG_20007 [Puccinia graminis f. sp. tritici CRL 75-36-700-3]	NA
PH560_18937-RI	XP_003326993.1/6.1e-45/hypothetical protein PGTG_08770 [Puccinia graminis f. sp. tritici CRL 75-36-700-3]	NA
PH560_18937-RJ	XP_003338410.1/2.7e-45/hypothetical protein PGTG_20007 [Puccinia graminis f. sp. tritici CRL 75-36-700-3]	NA
PH560_18937-RB	XP_003338410.1/2.8e-103/hypothetical protein PGTG_20007 [Puccinia graminis f. sp. tritici CRL 75-36-700-3]	NA
PH560_18937-RE	XP_003338410.1/6.8e-96/hypothetical protein PGTG_20007 [Puccinia graminis f. sp. tritici CRL 75-36-700-3]	NA
PH560_18937-RH	NA	NA
PH560_18941-RB	OAV89562.1/3.1e-90/hypothetical protein PTTG_12151 [Puccinia triticina 1-1 BBBD Race 1]	NA
PH560_18941-RA	OAV89562.1/7.8e-73/hypothetical protein PTTG_12151 [Puccinia triticina 1-1 BBBD Race 1]	NA
PH560_18943-RB	XP_003307316.2/2.5e-83/hypothetical protein PGTG_00266 [Puccinia graminis f. sp. tritici CRL 75-36-700-3]	NA
PH560_18943-RA	XP_003307316.2/3.4e-78/hypothetical protein PGTG_00266 [Puccinia graminis f. sp. tritici CRL 75-36-700-3]	NA
PH560_18943-RC	OAV89563.1/5.5e-38/hypothetical protein PTTG_28641 [Puccinia triticina 1-1 BBBD Race 1]	NA
PH560_18933-RA	XP_003307332.2/6.4e-77/hypothetical protein PGTG_00282 [Puccinia graminis f. sp. tritici CRL 75-36-700-3]	NA
PH560_18938-RA	KNZ59273.1/9.9e-11/uncharacterized protein VP01_176g4 [Puccinia sorghi]	NA
PH560_18936-RA	NA	NA
PH560_18935-RA	NA	NA
PH560_18945-RA	NA	NA
PH560_18944-RA	NA	NA
PH560_18954-RA	OAV91610.1/0.0e+00/hypothetical protein PTTG_09397 [Puccinia triticina 1-1 BBBD Race 1]	sp|A8N5E5|SEY1_COPC7/6.9e-226/Protein SEY1 OS=Coprinopsis cinerea (strain Okayama-7 / 130 / ATCC MYA-4618 / FGSC 9003) GN=SEY1 PE=3 SV=1
PH560_18954-RB	OAV91610.1/0.0e+00/hypothetical protein PTTG_09397 [Puccinia triticina 1-1 BBBD Race 1]	sp|A8N5E5|SEY1_COPC7/4.2e-225/Protein SEY1 OS=Coprinopsis cinerea (strain Okayama-7 / 130 / ATCC MYA-4618 / FGSC 9003) GN=SEY1 PE=3 SV=1
PH560_18950-RC	OAV89559.1/3.8e-303/hypothetical protein PTTG_04236 [Puccinia triticina 1-1 BBBD Race 1]	sp|O13722|TAF12_SCHPO/3.7e-24/Transcription initiation factor TFIID subunit 12 OS=Schizosaccharomyces pombe (strain 972 / ATCC 24843) GN=taf12 PE=1 SV=1
PH560_18950-RB	OAV89559.1/2.5e-291/hypothetical protein PTTG_04236 [Puccinia triticina 1-1 BBBD Race 1]	sp|O13722|TAF12_SCHPO/3.6e-24/Transcription initiation factor TFIID subunit 12 OS=Schizosaccharomyces pombe (strain 972 / ATCC 24843) GN=taf12 PE=1 SV=1
PH560_18950-RA	OAV89559.1/4.5e-250/hypothetical protein PTTG_04236 [Puccinia triticina 1-1 BBBD Race 1]	NA
PH560_18950-RF	XP_003307308.1/2.6e-219/hypothetical protein PGTG_00258 [Puccinia graminis f. sp. tritici CRL 75-36-700-3]	sp|O13722|TAF12_SCHPO/2.7e-24/Transcription initiation factor TFIID subunit 12 OS=Schizosaccharomyces pombe (strain 972 / ATCC 24843) GN=taf12 PE=1 SV=1
PH560_18950-RE	XP_003307308.1/1.1e-171/hypothetical protein PGTG_00258 [Puccinia graminis f. sp. tritici CRL 75-36-700-3]	sp|Q03761|TAF12_YEAST/1.4e-20/Transcription initiation factor TFIID subunit 12 OS=Saccharomyces cerevisiae (strain ATCC 204508 / S288c) GN=TAF12 PE=1 SV=1
PH560_18950-RD	XP_003307308.1/2.2e-191/hypothetical protein PGTG_00258 [Puccinia graminis f. sp. tritici CRL 75-36-700-3]	NA
PH560_18957-RA	OAV91598.1/0.0e+00/hypothetical protein PTTG_04246 [Puccinia triticina 1-1 BBBD Race 1]	sp|Q02354|UTP6_YEAST/3.2e-27/U3 small nucleolar RNA-associated protein 6 OS=Saccharomyces cerevisiae (strain ATCC 204508 / S288c) GN=UTP6 PE=1 SV=2
PH560_18957-RB	OAV91598.1/1.3e-302/hypothetical protein PTTG_04246 [Puccinia triticina 1-1 BBBD Race 1]	sp|Q02354|UTP6_YEAST/3.1e-27/U3 small nucleolar RNA-associated protein 6 OS=Saccharomyces cerevisiae (strain ATCC 204508 / S288c) GN=UTP6 PE=1 SV=2
PH560_18957-RC	OAV91598.1/0.0e+00/hypothetical protein PTTG_04246 [Puccinia triticina 1-1 BBBD Race 1]	sp|Q02354|UTP6_YEAST/8.1e-23/U3 small nucleolar RNA-associated protein 6 OS=Saccharomyces cerevisiae (strain ATCC 204508 / S288c) GN=UTP6 PE=1 SV=2
PH560_18967-RB	OAV91595.1/4.7e-294/hypothetical protein PTTG_04249 [Puccinia triticina 1-1 BBBD Race 1]	sp|Q99144|PEX5_YARLI/2.6e-79/Peroxisomal targeting signal receptor OS=Yarrowia lipolytica (strain CLIB 122 / E 150) GN=PAY32 PE=3 SV=1
PH560_18967-RA	OAV91595.1/4.2e-306/hypothetical protein PTTG_04249 [Puccinia triticina 1-1 BBBD Race 1]	sp|Q99144|PEX5_YARLI/2.4e-80/Peroxisomal targeting signal receptor OS=Yarrowia lipolytica (strain CLIB 122 / E 150) GN=PAY32 PE=3 SV=1
PH560_18967-RC	OAV91595.1/0.0e+00/hypothetical protein PTTG_04249 [Puccinia triticina 1-1 BBBD Race 1]	sp|Q99144|PEX5_YARLI/2.9e-81/Peroxisomal targeting signal receptor OS=Yarrowia lipolytica (strain CLIB 122 / E 150) GN=PAY32 PE=3 SV=1
PH560_18967-RF	OAV91595.1/6.2e-227/hypothetical protein PTTG_04249 [Puccinia triticina 1-1 BBBD Race 1]	sp|Q99144|PEX5_YARLI/1.1e-79/Peroxisomal targeting signal receptor OS=Yarrowia lipolytica (strain CLIB 122 / E 150) GN=PAY32 PE=3 SV=1
PH560_18967-RE	OAV91595.1/1.2e-220/hypothetical protein PTTG_04249 [Puccinia triticina 1-1 BBBD Race 1]	sp|Q99144|PEX5_YARLI/6.3e-78/Peroxisomal targeting signal receptor OS=Yarrowia lipolytica (strain CLIB 122 / E 150) GN=PAY32 PE=3 SV=1
PH560_18967-RD	NA	NA
PH560_18953-RA	OAV91611.1/3.0e-225/hypothetical protein PTTG_09398 [Puccinia triticina 1-1 BBBD Race 1]	NA
PH560_18958-RA	OAV91600.1/3.9e-139/hypothetical protein PTTG_04244 [Puccinia triticina 1-1 BBBD Race 1]	NA
PH560_18968-RA	OAV91594.1/1.4e-217/hypothetical protein PTTG_04250 [Puccinia triticina 1-1 BBBD Race 1]	NA
PH560_18966-RA	OAV91596.1/3.5e-191/hypothetical protein PTTG_04248 [Puccinia triticina 1-1 BBBD Race 1]	sp|P87125|URED_SCHPO/2.6e-18/Uncharacterized urease accessory protein ureD-like OS=Schizosaccharomyces pombe (strain 972 / ATCC 24843) GN=SPAC3A12.09c PE=3 SV=1
PH560_18966-RB	OAV91596.1/9.7e-183/hypothetical protein PTTG_04248 [Puccinia triticina 1-1 BBBD Race 1]	sp|P87125|URED_SCHPO/2.5e-18/Uncharacterized urease accessory protein ureD-like OS=Schizosaccharomyces pombe (strain 972 / ATCC 24843) GN=SPAC3A12.09c PE=3 SV=1
PH560_18947-RA	OAV91613.1/2.4e-192/hypothetical protein PTTG_04238 [Puccinia triticina 1-1 BBBD Race 1]	sp|O94564|YGD6_SCHPO/4.2e-32/Zinc-type alcohol dehydrogenase-like protein C1773.06c OS=Schizosaccharomyces pombe (strain 972 / ATCC 24843) GN=SPBC1773.06c PE=3 SV=1
PH560_18947-RB	OAV91613.1/1.9e-35/hypothetical protein PTTG_04238 [Puccinia triticina 1-1 BBBD Race 1]	sp|O94564|YGD6_SCHPO/2.9e-12/Zinc-type alcohol dehydrogenase-like protein C1773.06c OS=Schizosaccharomyces pombe (strain 972 / ATCC 24843) GN=SPBC1773.06c PE=3 SV=1
PH560_18949-RA	OAV86703.1/6.5e-182/hypothetical protein PTTG_01402 [Puccinia triticina 1-1 BBBD Race 1]	sp|Q9P6P1|TLG2_SCHPO/4.0e-35/t-SNARE affecting a late Golgi compartment protein 2 OS=Schizosaccharomyces pombe (strain 972 / ATCC 24843) GN=tlg2 PE=3 SV=1
PH560_18956-RB	OAV91603.1/1.2e-123/anthranilate phosphoribosyltransferase [Puccinia triticina 1-1 BBBD Race 1]	sp|O60122|TRPD_SCHPO/1.2e-24/Anthranilate phosphoribosyltransferase OS=Schizosaccharomyces pombe (strain 972 / ATCC 24843) GN=trp4 PE=3 SV=1
PH560_18956-RA	OAV91603.1/6.8e-198/anthranilate phosphoribosyltransferase [Puccinia triticina 1-1 BBBD Race 1]	sp|O60122|TRPD_SCHPO/7.9e-58/Anthranilate phosphoribosyltransferase OS=Schizosaccharomyces pombe (strain 972 / ATCC 24843) GN=trp4 PE=3 SV=1
PH560_18956-RC	NA	NA
PH560_18952-RB	OAV91612.1/1.6e-144/hypothetical protein PTTG_09399 [Puccinia triticina 1-1 BBBD Race 1]	sp|Q10492|PNN1_SCHPO/3.3e-06/Pinin homolog 1 OS=Schizosaccharomyces pombe (strain 972 / ATCC 24843) GN=pnn1 PE=3 SV=1
PH560_18952-RC	OAV91612.1/7.4e-130/hypothetical protein PTTG_09399 [Puccinia triticina 1-1 BBBD Race 1]	sp|Q10492|PNN1_SCHPO/2.2e-06/Pinin homolog 1 OS=Schizosaccharomyces pombe (strain 972 / ATCC 24843) GN=pnn1 PE=3 SV=1
PH560_18952-RA	OAV91612.1/1.6e-37/hypothetical protein PTTG_09399 [Puccinia triticina 1-1 BBBD Race 1]	NA
PH560_18964-RA	OAV91599.1/1.3e-123/hypothetical protein PTTG_04245 [Puccinia triticina 1-1 BBBD Race 1]	sp|Q9P7C6|CWC23_SCHPO/4.5e-17/Pre-mRNA-splicing factor cwf23 OS=Schizosaccharomyces pombe (strain 972 / ATCC 24843) GN=cwf23 PE=1 SV=2
PH560_18959-RA	OAV90380.1/5.1e-61/hypothetical protein PTTG_08299 [Puccinia triticina 1-1 BBBD Race 1]	NA
PH560_18969-RA	OAV91593.1/2.3e-46/hypothetical protein PTTG_27925 [Puccinia triticina 1-1 BBBD Race 1]	NA
PH560_18951-RA	OAV85844.1/1.5e-50/hypothetical protein PTTG_30234, partial [Puccinia triticina 1-1 BBBD Race 1]	NA
PH560_18951-RB	KNF02369.1/6.8e-77/hypothetical protein PSTG_04277 [Puccinia striiformis f. sp. tritici PST-78]	NA
PH560_18965-RB	OAV91597.1/1.0e-63/hypothetical protein PTTG_04247 [Puccinia triticina 1-1 BBBD Race 1]	sp|P0CP97|FKBP2_CRYNB/2.4e-41/FK506-binding protein 2 OS=Cryptococcus neoformans var. neoformans serotype D (strain B-3501A) GN=FPR2 PE=3 SV=1
PH560_18965-RA	OAV91597.1/1.5e-55/hypothetical protein PTTG_04247 [Puccinia triticina 1-1 BBBD Race 1]	sp|P0CP97|FKBP2_CRYNB/9.4e-39/FK506-binding protein 2 OS=Cryptococcus neoformans var. neoformans serotype D (strain B-3501A) GN=FPR2 PE=3 SV=1
PH560_18960-RA	XP_003323635.2/1.1e-44/hypothetical protein PGTG_05537 [Puccinia graminis f. sp. tritici CRL 75-36-700-3]	NA
PH560_18961-RA	XP_003307298.1/2.9e-34/hypothetical protein PGTG_00248 [Puccinia graminis f. sp. tritici CRL 75-36-700-3]	NA
PH560_18955-RA	OAV91606.1/9.6e-36/hypothetical protein PTTG_09971 [Puccinia triticina 1-1 BBBD Race 1]	NA
PH560_18948-RA	NA	NA
PH560_18970-RA	OAV96963.1/3.0e-06/hypothetical protein PTTG_26200 [Puccinia triticina 1-1 BBBD Race 1]	NA
PH560_18963-RA	OAV98645.1/2.8e-10/hypothetical protein PTTG_01739 [Puccinia triticina 1-1 BBBD Race 1]	NA
PH560_18962-RA	NA	NA
PH560_00526-RE	KNF00861.1/1.1e-186/hypothetical protein PSTG_05996 [Puccinia striiformis f. sp. tritici PST-78]	NA
PH560_00526-RD	KNF00861.1/2.1e-129/hypothetical protein PSTG_05996 [Puccinia striiformis f. sp. tritici PST-78]	NA
PH560_00526-RI	KNZ62846.1/1.0e-180/hypothetical protein VP01_1216g4 [Puccinia sorghi]	NA
PH560_00526-RC	KNF00861.1/5.9e-104/hypothetical protein PSTG_05996 [Puccinia striiformis f. sp. tritici PST-78]	NA
PH560_00526-RB	KNE98393.1/1.4e-95/hypothetical protein PSTG_08313 [Puccinia striiformis f. sp. tritici PST-78]	NA
PH560_00526-RH	KNZ62846.1/8.9e-181/hypothetical protein VP01_1216g4 [Puccinia sorghi]	NA
PH560_00526-RG	KNZ52985.1/6.6e-136/hypothetical protein VP01_337g12 [Puccinia sorghi]	NA
PH560_00526-RF	KNF00861.1/7.5e-103/hypothetical protein PSTG_05996 [Puccinia striiformis f. sp. tritici PST-78]	NA
PH560_00526-RA	KNE90634.1/2.4e-65/hypothetical protein PSTG_15952 [Puccinia striiformis f. sp. tritici PST-78]	NA
PH560_00534-RA	KNZ60175.1/2.5e-84/uncharacterized protein VP01_15g9 [Puccinia sorghi]	NA
PH560_00534-RB	KNZ60175.1/1.0e-71/uncharacterized protein VP01_15g9 [Puccinia sorghi]	NA
PH560_00525-RA	XP_003328097.1/6.5e-119/hypothetical protein PGTG_09391 [Puccinia graminis f. sp. tritici CRL 75-36-700-3]	NA
PH560_00525-RB	XP_003337581.1/4.6e-77/hypothetical protein PGTG_19122 [Puccinia graminis f. sp. tritici CRL 75-36-700-3]	NA
PH560_00525-RC	XP_003337581.1/3.3e-74/hypothetical protein PGTG_19122 [Puccinia graminis f. sp. tritici CRL 75-36-700-3]	NA
PH560_00525-RD	NA	NA
PH560_00525-RE	NA	NA
PH560_00531-RB	XP_003338497.1/1.7e-58/hypothetical protein PGTG_19981 [Puccinia graminis f. sp. tritici CRL 75-36-700-3]	NA
PH560_00531-RA	XP_003326405.2/1.6e-14/hypothetical protein PGTG_08235 [Puccinia graminis f. sp. tritici CRL 75-36-700-3]	NA
PH560_00524-RC	XP_003337095.1/2.5e-117/hypothetical protein PGTG_18191 [Puccinia graminis f. sp. tritici CRL 75-36-700-3]	NA
PH560_00524-RA	XP_003337095.1/2.2e-117/hypothetical protein PGTG_18191 [Puccinia graminis f. sp. tritici CRL 75-36-700-3]	NA
PH560_00524-RD	XP_003337095.1/5.3e-113/hypothetical protein PGTG_18191 [Puccinia graminis f. sp. tritici CRL 75-36-700-3]	NA
PH560_00524-RB	XP_003337095.1/6.3e-108/hypothetical protein PGTG_18191 [Puccinia graminis f. sp. tritici CRL 75-36-700-3]	NA
PH560_00524-RE	XP_003337095.1/3.6e-102/hypothetical protein PGTG_18191 [Puccinia graminis f. sp. tritici CRL 75-36-700-3]	NA
PH560_00523-RA	KNE87216.1/3.9e-27/hypothetical protein PSTG_19403, partial [Puccinia striiformis f. sp. tritici PST-78]	NA
PH560_00533-RD	OAV99843.1/2.8e-62/hypothetical protein PTTG_25317 [Puccinia triticina 1-1 BBBD Race 1]	NA
PH560_00533-RC	OAV99843.1/9.5e-60/hypothetical protein PTTG_25317 [Puccinia triticina 1-1 BBBD Race 1]	NA
PH560_00533-RB	OAV99843.1/1.5e-54/hypothetical protein PTTG_25317 [Puccinia triticina 1-1 BBBD Race 1]	NA
PH560_00533-RA	OAV99843.1/7.8e-35/hypothetical protein PTTG_25317 [Puccinia triticina 1-1 BBBD Race 1]	NA
PH560_00522-RA	XP_003321915.2/4.2e-31/hypothetical protein PGTG_03452 [Puccinia graminis f. sp. tritici CRL 75-36-700-3]	NA
PH560_00527-RA	OAV89040.1/7.7e-62/RING-box protein 1 [Puccinia triticina 1-1 BBBD Race 1]	sp|O13959|RBX1_SCHPO/2.0e-46/RING-box protein pip1 OS=Schizosaccharomyces pombe (strain 972 / ATCC 24843) GN=pip1 PE=1 SV=2
PH560_00528-RA	OAV96430.1/1.2e-40/hypothetical protein PTTG_04005 [Puccinia triticina 1-1 BBBD Race 1]	NA
PH560_00532-RB	NA	NA
PH560_00532-RA	NA	NA
PH560_00530-RA	OAV86558.1/1.3e-23/hypothetical protein PTTG_03307 [Puccinia triticina 1-1 BBBD Race 1]	NA
PH560_00529-RA	NA	NA
PH560_00537-RB	XP_016269199.1/1.7e-241/retrotransposon polyprotein [Rhodotorula toruloides NP11]	sp|P0CT40|TF29_SCHPO/6.0e-98/Transposon Tf2-9 polyprotein OS=Schizosaccharomyces pombe (strain 972 / ATCC 24843) GN=Tf2-9 PE=3 SV=1
PH560_00537-RA	XP_016269199.1/1.5e-241/retrotransposon polyprotein [Rhodotorula toruloides NP11]	sp|P0CT40|TF29_SCHPO/5.1e-98/Transposon Tf2-9 polyprotein OS=Schizosaccharomyces pombe (strain 972 / ATCC 24843) GN=Tf2-9 PE=3 SV=1
PH560_00537-RD	KNE97333.1/1.6e-53/hypothetical protein PSTG_09444 [Puccinia striiformis f. sp. tritici PST-78]	NA
PH560_00537-RC	KNF00894.1/1.6e-24/hypothetical protein PSTG_05786 [Puccinia striiformis f. sp. tritici PST-78]	NA
PH560_00540-RA	KIO08044.1/2.6e-32/hypothetical protein M404DRAFT_78898, partial [Pisolithus tinctorius Marx 270]	NA
PH560_00536-RB	KNE92302.1/5.2e-49/hypothetical protein PSTG_14325 [Puccinia striiformis f. sp. tritici PST-78]	sp|Q2HEW5|CHG2_CHAGB/1.3e-20/PKS-NRPS hybrid synthetase CHGG_01239 OS=Chaetomium globosum (strain ATCC 6205 / CBS 148.51 / DSM 1962 / NBRC 6347 / NRRL 1970) GN=CHGG_01239 PE=3 SV=1
PH560_00536-RA	KNE92302.1/3.4e-60/hypothetical protein PSTG_14325 [Puccinia striiformis f. sp. tritici PST-78]	sp|Q2HEW5|CHG2_CHAGB/1.7e-24/PKS-NRPS hybrid synthetase CHGG_01239 OS=Chaetomium globosum (strain ATCC 6205 / CBS 148.51 / DSM 1962 / NBRC 6347 / NRRL 1970) GN=CHGG_01239 PE=3 SV=1
PH560_00541-RA	XP_003889309.1/7.4e-80/hypothetical protein PGTG_22015 [Puccinia graminis f. sp. tritici CRL 75-36-700-3]	NA
PH560_00538-RA	OAV89041.1/9.9e-91/hypothetical protein PTTG_28836 [Puccinia triticina 1-1 BBBD Race 1]	sp|Q8X1P1|CUTI_BLUGH/7.3e-06/Cutinase OS=Blumeria graminis f. sp. hordei GN=CUT1 PE=3 SV=1
PH560_00538-RC	OAV89041.1/6.3e-78/hypothetical protein PTTG_28836 [Puccinia triticina 1-1 BBBD Race 1]	sp|Q8X1P1|CUTI_BLUGH/6.2e-06/Cutinase OS=Blumeria graminis f. sp. hordei GN=CUT1 PE=3 SV=1
PH560_00538-RD	OAV89041.1/3.6e-74/hypothetical protein PTTG_28836 [Puccinia triticina 1-1 BBBD Race 1]	NA
PH560_00538-RB	OAV89041.1/2.7e-31/hypothetical protein PTTG_28836 [Puccinia triticina 1-1 BBBD Race 1]	NA
PH560_00543-RA	OAV92177.1/2.8e-25/hypothetical protein PTTG_03710 [Puccinia triticina 1-1 BBBD Race 1]	NA
PH560_00544-RA	XP_003330410.1/3.9e-59/hypothetical protein PGTG_11747 [Puccinia graminis f. sp. tritici CRL 75-36-700-3]	sp|P39825|PROF_SCHPO/2.4e-29/Profilin OS=Schizosaccharomyces pombe (strain 972 / ATCC 24843) GN=cdc3 PE=1 SV=1
PH560_00539-RA	NA	NA
PH560_00535-RA	XP_003329560.2/6.0e-11/hypothetical protein PGTG_11310 [Puccinia graminis f. sp. tritici CRL 75-36-700-3]	NA
PH560_00542-RA	NA	NA
PH560_00556-RA	OAV95367.1/0.0e+00/hypothetical protein PTTG_12298, partial [Puccinia triticina 1-1 BBBD Race 1]	NA
PH560_00556-RB	OAV95367.1/0.0e+00/hypothetical protein PTTG_12298, partial [Puccinia triticina 1-1 BBBD Race 1]	NA
PH560_00553-RB	OAV95357.1/0.0e+00/hypothetical protein PTTG_05420 [Puccinia triticina 1-1 BBBD Race 1]	sp|E3L8A5|KEX1_PUCGT/0.0e+00/Pheromone-processing carboxypeptidase KEX1 OS=Puccinia graminis f. sp. tritici (strain CRL 75-36-700-3 / race SCCL) GN=KEX1 PE=3 SV=2
PH560_00553-RA	OAV95357.1/0.0e+00/hypothetical protein PTTG_05420 [Puccinia triticina 1-1 BBBD Race 1]	sp|E3L8A5|KEX1_PUCGT/0.0e+00/Pheromone-processing carboxypeptidase KEX1 OS=Puccinia graminis f. sp. tritici (strain CRL 75-36-700-3 / race SCCL) GN=KEX1 PE=3 SV=2
PH560_00554-RA	OAV87766.1/1.2e-177/hypothetical protein PTTG_11798 [Puccinia triticina 1-1 BBBD Race 1]	NA
PH560_00551-RB	KNF05967.1/4.4e-123/hypothetical protein PSTG_00960 [Puccinia striiformis f. sp. tritici PST-78]	NA
PH560_00551-RA	KNF05967.1/7.1e-124/hypothetical protein PSTG_00960 [Puccinia striiformis f. sp. tritici PST-78]	NA
PH560_00555-RB	KNZ57680.1/1.8e-51/hypothetical protein VP01_2100g2 [Puccinia sorghi]	NA
PH560_00555-RA	KNZ48380.1/3.9e-28/hypothetical protein VP01_5709g1, partial [Puccinia sorghi]	NA
PH560_00545-RA	OAV89044.1/2.0e-84/hypothetical protein PTTG_07129 [Puccinia triticina 1-1 BBBD Race 1]	sp|O13614|RS10B_SCHPO/2.2e-35/40S ribosomal protein S10-B OS=Schizosaccharomyces pombe (strain 972 / ATCC 24843) GN=rps1002 PE=3 SV=1
PH560_00550-RA	NA	NA
PH560_00548-RB	KNE91264.1/7.7e-20/hypothetical protein PSTG_15329 [Puccinia striiformis f. sp. tritici PST-78]	NA
PH560_00548-RA	NA	NA
PH560_00547-RA	KNE96180.1/1.1e-31/hypothetical protein PSTG_10595 [Puccinia striiformis f. sp. tritici PST-78]	NA
PH560_00546-RA	OAV92956.1/1.7e-17/hypothetical protein PTTG_02693 [Puccinia triticina 1-1 BBBD Race 1]	NA
PH560_00552-RA	NA	NA
PH560_00568-RA	OAV95370.1/0.0e+00/hypothetical protein PTTG_26656 [Puccinia triticina 1-1 BBBD Race 1]	NA
PH560_00568-RB	OAV95370.1/0.0e+00/hypothetical protein PTTG_26656 [Puccinia triticina 1-1 BBBD Race 1]	NA
PH560_00573-RB	XP_003889967.1/4.9e-114/hypothetical protein PGTG_21436 [Puccinia graminis f. sp. tritici CRL 75-36-700-3]	sp|Q2HEW5|CHG2_CHAGB/2.0e-24/PKS-NRPS hybrid synthetase CHGG_01239 OS=Chaetomium globosum (strain ATCC 6205 / CBS 148.51 / DSM 1962 / NBRC 6347 / NRRL 1970) GN=CHGG_01239 PE=3 SV=1
PH560_00573-RA	XP_003889256.1/3.4e-88/hypothetical protein PGTG_22034 [Puccinia graminis f. sp. tritici CRL 75-36-700-3]	sp|Q2HEW5|CHG2_CHAGB/2.0e-08/PKS-NRPS hybrid synthetase CHGG_01239 OS=Chaetomium globosum (strain ATCC 6205 / CBS 148.51 / DSM 1962 / NBRC 6347 / NRRL 1970) GN=CHGG_01239 PE=3 SV=1
PH560_00573-RD	KNE88595.1/3.8e-75/hypothetical protein PSTG_17987 [Puccinia striiformis f. sp. tritici PST-78]	NA
PH560_00573-RC	KNE88595.1/5.0e-54/hypothetical protein PSTG_17987 [Puccinia striiformis f. sp. tritici PST-78]	NA
PH560_00560-RB	KNF05951.1/1.2e-204/hypothetical protein PSTG_00943 [Puccinia striiformis f. sp. tritici PST-78]	NA
PH560_00560-RA	KNF05951.1/7.2e-200/hypothetical protein PSTG_00943 [Puccinia striiformis f. sp. tritici PST-78]	NA
PH560_00560-RC	KNF05951.1/9.6e-170/hypothetical protein PSTG_00943 [Puccinia striiformis f. sp. tritici PST-78]	NA
PH560_00560-RD	KNF05951.1/3.2e-77/hypothetical protein PSTG_00943 [Puccinia striiformis f. sp. tritici PST-78]	NA
PH560_00562-RA	OAV95374.1/1.2e-227/hypothetical protein PTTG_05432 [Puccinia triticina 1-1 BBBD Race 1]	sp|E9ERT9|CHI1_METRA/2.9e-24/Endochitinase 1 OS=Metarhizium robertsii (strain ARSEF 23 / ATCC MYA-3075) GN=chit1 PE=3 SV=1
PH560_00562-RE	OAV95374.1/3.5e-188/hypothetical protein PTTG_05432 [Puccinia triticina 1-1 BBBD Race 1]	sp|O14456|CHI1_METAN/4.2e-21/Endochitinase 1 OS=Metarhizium anisopliae GN=chit1 PE=1 SV=1
PH560_00562-RD	OAV95374.1/3.7e-182/hypothetical protein PTTG_05432 [Puccinia triticina 1-1 BBBD Race 1]	sp|A6N6J0|CHI46_TRIHA/5.2e-16/Endochitinase 46 OS=Trichoderma harzianum GN=chit46 PE=1 SV=1
PH560_00562-RC	OAV95374.1/1.9e-172/hypothetical protein PTTG_05432 [Puccinia triticina 1-1 BBBD Race 1]	sp|O14456|CHI1_METAN/3.8e-21/Endochitinase 1 OS=Metarhizium anisopliae GN=chit1 PE=1 SV=1
PH560_00562-RG	OAV95374.1/3.2e-91/hypothetical protein PTTG_05432 [Puccinia triticina 1-1 BBBD Race 1]	sp|P09805|KTXA_KLULA/9.1e-14/Killer toxin subunits alpha/beta OS=Kluyveromyces lactis (strain ATCC 8585 / CBS 2359 / DSM 70799 / NBRC 1267 / NRRL Y-1140 / WM37) PE=1 SV=1
PH560_00562-RB	OAV95374.1/2.8e-114/hypothetical protein PTTG_05432 [Puccinia triticina 1-1 BBBD Race 1]	sp|O14456|CHI1_METAN/1.1e-09/Endochitinase 1 OS=Metarhizium anisopliae GN=chit1 PE=1 SV=1
PH560_00562-RF	NA	NA
PH560_00570-RA	SAL96806.1/6.1e-82/hypothetical protein [Absidia glauca]	NA
PH560_00570-RD	SAL96806.1/5.9e-82/hypothetical protein [Absidia glauca]	NA
PH560_00570-RC	OAV87008.1/1.9e-18/hypothetical protein PTTG_29621 [Puccinia triticina 1-1 BBBD Race 1]	NA
PH560_00570-RB	OAV89907.1/5.2e-19/hypothetical protein PTTG_28502 [Puccinia triticina 1-1 BBBD Race 1]	NA
PH560_00565-RA	XP_003889967.1/4.9e-68/hypothetical protein PGTG_21436 [Puccinia graminis f. sp. tritici CRL 75-36-700-3]	NA
PH560_00569-RB	OAV95381.1/5.5e-153/hypothetical protein PTTG_12299 [Puccinia triticina 1-1 BBBD Race 1]	NA
PH560_00569-RA	XP_003337214.2/1.3e-68/hypothetical protein PGTG_18574 [Puccinia graminis f. sp. tritici CRL 75-36-700-3]	NA
PH560_00557-RA	OAV95365.1/4.6e-168/hypothetical protein PTTG_12297 [Puccinia triticina 1-1 BBBD Race 1]	sp|Q12199|TIP41_YEAST/2.9e-42/Type 2A phosphatase activator TIP41 OS=Saccharomyces cerevisiae (strain ATCC 204508 / S288c) GN=TIP41 PE=1 SV=1
PH560_00564-RA	XP_003338497.1/8.4e-58/hypothetical protein PGTG_19981 [Puccinia graminis f. sp. tritici CRL 75-36-700-3]	NA
PH560_00564-RB	XP_003329560.2/1.9e-15/hypothetical protein PGTG_11310 [Puccinia graminis f. sp. tritici CRL 75-36-700-3]	NA
PH560_00572-RA	XP_003338497.1/5.7e-59/hypothetical protein PGTG_19981 [Puccinia graminis f. sp. tritici CRL 75-36-700-3]	NA
PH560_00572-RB	XP_003326405.2/1.6e-14/hypothetical protein PGTG_08235 [Puccinia graminis f. sp. tritici CRL 75-36-700-3]	NA
PH560_00561-RB	OAV95376.1/8.0e-143/hypothetical protein PTTG_05433 [Puccinia triticina 1-1 BBBD Race 1]	NA
PH560_00561-RA	OAV95376.1/6.8e-128/hypothetical protein PTTG_05433 [Puccinia triticina 1-1 BBBD Race 1]	NA
PH560_00566-RA	KNE88595.1/9.5e-69/hypothetical protein PSTG_17987 [Puccinia striiformis f. sp. tritici PST-78]	NA
PH560_00571-RC	KNE90418.1/5.0e-26/hypothetical protein PSTG_16122 [Puccinia striiformis f. sp. tritici PST-78]	NA
PH560_00571-RA	OAV94977.1/6.4e-30/hypothetical protein PTTG_06957 [Puccinia triticina 1-1 BBBD Race 1]	NA
PH560_00571-RB	OAV94977.1/2.4e-33/hypothetical protein PTTG_06957 [Puccinia triticina 1-1 BBBD Race 1]	NA
PH560_00558-RB	OAV95366.1/7.5e-101/hypothetical protein PTTG_05427 [Puccinia triticina 1-1 BBBD Race 1]	NA
PH560_00558-RA	OAV95366.1/2.6e-105/hypothetical protein PTTG_05427 [Puccinia triticina 1-1 BBBD Race 1]	NA
PH560_00558-RC	OAV95366.1/1.9e-85/hypothetical protein PTTG_05427 [Puccinia triticina 1-1 BBBD Race 1]	NA
PH560_00559-RA	KNE94872.1/1.9e-26/hypothetical protein PSTG_11776 [Puccinia striiformis f. sp. tritici PST-78]	NA
PH560_00567-RA	XP_003890791.1/1.2e-29/hypothetical protein PGTG_20597 [Puccinia graminis f. sp. tritici CRL 75-36-700-3]	NA
PH560_00567-RB	KNE96870.1/4.7e-14/hypothetical protein PSTG_09854 [Puccinia striiformis f. sp. tritici PST-78]	NA
PH560_00563-RA	OAV93458.1/4.8e-17/hypothetical protein PTTG_27352 [Puccinia triticina 1-1 BBBD Race 1]	NA
PH560_00563-RB	NA	NA
PH560_00584-RA	KNF05923.1/5.2e-223/hypothetical protein PSTG_00916 [Puccinia striiformis f. sp. tritici PST-78]	sp|Q9US60|KLP3_SCHPO/2.6e-38/Kinesin-like protein 3 OS=Schizosaccharomyces pombe (strain 972 / ATCC 24843) GN=klp3 PE=2 SV=1
PH560_00584-RB	OAV95387.1/1.0e-184/hypothetical protein PTTG_26663 [Puccinia triticina 1-1 BBBD Race 1]	sp|O14343|KLP5_SCHPO/2.4e-34/Kinesin-like protein 5 OS=Schizosaccharomyces pombe (strain 972 / ATCC 24843) GN=klp5 PE=1 SV=1
PH560_00574-RA	KNE97437.1/0.0e+00/hypothetical protein PSTG_09271 [Puccinia striiformis f. sp. tritici PST-78]	sp|D4ALV9|SUB6_ARTBC/5.6e-11/Subtilisin-like protease 6 OS=Arthroderma benhamiae (strain ATCC MYA-4681 / CBS 112371) GN=SUB6 PE=2 SV=1
PH560_00574-RC	KNE97437.1/1.9e-310/hypothetical protein PSTG_09271 [Puccinia striiformis f. sp. tritici PST-78]	sp|D4ALV9|SUB6_ARTBC/4.8e-11/Subtilisin-like protease 6 OS=Arthroderma benhamiae (strain ATCC MYA-4681 / CBS 112371) GN=SUB6 PE=2 SV=1
PH560_00574-RB	KNE97437.1/0.0e+00/hypothetical protein PSTG_09271 [Puccinia striiformis f. sp. tritici PST-78]	sp|D4ALV9|SUB6_ARTBC/1.1e-10/Subtilisin-like protease 6 OS=Arthroderma benhamiae (strain ATCC MYA-4681 / CBS 112371) GN=SUB6 PE=2 SV=1
PH560_00574-RD	NA	NA
PH560_00583-RA	XP_003889256.1/3.1e-85/hypothetical protein PGTG_22034 [Puccinia graminis f. sp. tritici CRL 75-36-700-3]	NA
PH560_00583-RB	XP_003889967.1/2.7e-106/hypothetical protein PGTG_21436 [Puccinia graminis f. sp. tritici CRL 75-36-700-3]	sp|Q2HEW5|CHG2_CHAGB/1.1e-22/PKS-NRPS hybrid synthetase CHGG_01239 OS=Chaetomium globosum (strain ATCC 6205 / CBS 148.51 / DSM 1962 / NBRC 6347 / NRRL 1970) GN=CHGG_01239 PE=3 SV=1
PH560_00583-RC	KNE88595.1/5.2e-63/hypothetical protein PSTG_17987 [Puccinia striiformis f. sp. tritici PST-78]	NA
PH560_00583-RD	NA	NA
PH560_00582-RA	XP_003338497.1/4.4e-59/hypothetical protein PGTG_19981 [Puccinia graminis f. sp. tritici CRL 75-36-700-3]	NA
PH560_00582-RB	XP_003326405.2/1.6e-14/hypothetical protein PGTG_08235 [Puccinia graminis f. sp. tritici CRL 75-36-700-3]	NA
PH560_00579-RA	OAV95394.1/2.1e-50/hypothetical protein PTTG_05447 [Puccinia triticina 1-1 BBBD Race 1]	NA
PH560_00578-RC	OAV94712.1/1.1e-55/hypothetical protein PTTG_26912 [Puccinia triticina 1-1 BBBD Race 1]	NA
PH560_00578-RB	OAV94712.1/6.1e-56/hypothetical protein PTTG_26912 [Puccinia triticina 1-1 BBBD Race 1]	NA
PH560_00578-RA	OAV94712.1/2.5e-18/hypothetical protein PTTG_26912 [Puccinia triticina 1-1 BBBD Race 1]	NA
PH560_00576-RA	XP_003337802.2/7.7e-48/hypothetical protein PGTG_19401 [Puccinia graminis f. sp. tritici CRL 75-36-700-3]	NA
PH560_00581-RA	KNE91264.1/5.9e-22/hypothetical protein PSTG_15329 [Puccinia striiformis f. sp. tritici PST-78]	NA
PH560_00580-RA	KNZ51673.1/6.6e-23/uncharacterized protein VP01_386g17 [Puccinia sorghi]	NA
PH560_00575-RA	OAV95240.1/4.0e-16/hypothetical protein PTTG_10193 [Puccinia triticina 1-1 BBBD Race 1]	NA
PH560_00577-RA	XP_003337221.2/9.7e-20/hypothetical protein PGTG_18581 [Puccinia graminis f. sp. tritici CRL 75-36-700-3]	NA
PH560_00590-RA	OAV95359.1/1.8e-199/hypothetical protein PTTG_12296 [Puccinia triticina 1-1 BBBD Race 1]	NA
PH560_00590-RB	OAV95359.1/2.0e-214/hypothetical protein PTTG_12296 [Puccinia triticina 1-1 BBBD Race 1]	NA
PH560_00588-RA	OAV95359.1/6.3e-213/hypothetical protein PTTG_12296 [Puccinia triticina 1-1 BBBD Race 1]	NA
PH560_00588-RB	OAV95359.1/2.2e-216/hypothetical protein PTTG_12296 [Puccinia triticina 1-1 BBBD Race 1]	NA
PH560_00594-RB	XP_003890579.1/1.8e-102/hypothetical protein PGTG_20866 [Puccinia graminis f. sp. tritici CRL 75-36-700-3]	NA
PH560_00594-RD	XP_003890579.1/5.0e-65/hypothetical protein PGTG_20866 [Puccinia graminis f. sp. tritici CRL 75-36-700-3]	NA
PH560_00594-RC	XP_003890579.1/3.8e-48/hypothetical protein PGTG_20866 [Puccinia graminis f. sp. tritici CRL 75-36-700-3]	NA
PH560_00594-RA	KNE97540.1/3.9e-39/hypothetical protein PSTG_09235 [Puccinia striiformis f. sp. tritici PST-78]	NA
PH560_00594-RE	NA	NA
PH560_00595-RB	KNZ60832.1/2.8e-77/hypothetical protein VP01_1494g2 [Puccinia sorghi]	NA
PH560_00595-RA	KNZ60832.1/2.2e-08/hypothetical protein VP01_1494g2 [Puccinia sorghi]	NA
PH560_00591-RA	OAV96824.1/1.0e-55/hypothetical protein PTTG_26260 [Puccinia triticina 1-1 BBBD Race 1]	NA
PH560_00591-RB	XP_003329560.2/4.3e-15/hypothetical protein PGTG_11310 [Puccinia graminis f. sp. tritici CRL 75-36-700-3]	NA
PH560_00589-RC	KNZ49606.1/1.8e-80/uncharacterized protein VP01_4908g1 [Puccinia sorghi]	NA
PH560_00589-RB	KNZ48614.1/1.2e-45/uncharacterized protein VP01_5539g1 [Puccinia sorghi]	NA
PH560_00589-RA	KNE87112.1/1.5e-23/hypothetical protein PSTG_19512, partial [Puccinia striiformis f. sp. tritici PST-78]	NA
PH560_00593-RA	KNE88595.1/8.5e-70/hypothetical protein PSTG_17987 [Puccinia striiformis f. sp. tritici PST-78]	NA
PH560_00592-RA	KNE91264.1/7.0e-57/hypothetical protein PSTG_15329 [Puccinia striiformis f. sp. tritici PST-78]	NA
PH560_00592-RB	KNE91264.1/7.1e-28/hypothetical protein PSTG_15329 [Puccinia striiformis f. sp. tritici PST-78]	NA
PH560_00592-RC	KNE91264.1/8.0e-20/hypothetical protein PSTG_15329 [Puccinia striiformis f. sp. tritici PST-78]	NA
PH560_00587-RC	KNE99067.1/5.1e-100/hypothetical protein PSTG_07718 [Puccinia striiformis f. sp. tritici PST-78]	NA
PH560_00587-RF	KNE91263.1/5.9e-54/hypothetical protein PSTG_15328 [Puccinia striiformis f. sp. tritici PST-78]	NA
PH560_00587-RB	KNE89024.1/2.9e-39/hypothetical protein PSTG_17519, partial [Puccinia striiformis f. sp. tritici PST-78]	NA
PH560_00587-RE	KNE91263.1/6.4e-22/hypothetical protein PSTG_15328 [Puccinia striiformis f. sp. tritici PST-78]	NA
PH560_00587-RA	KNE89024.1/1.3e-21/hypothetical protein PSTG_17519, partial [Puccinia striiformis f. sp. tritici PST-78]	NA
PH560_00587-RD	KNE91263.1/6.5e-17/hypothetical protein PSTG_15328 [Puccinia striiformis f. sp. tritici PST-78]	NA
PH560_00596-RC	KNZ60832.1/1.4e-73/hypothetical protein VP01_1494g2 [Puccinia sorghi]	NA
PH560_00596-RB	XP_003320735.2/1.3e-70/hypothetical protein PGTG_02757 [Puccinia graminis f. sp. tritici CRL 75-36-700-3]	NA
PH560_00596-RA	XP_003320735.2/6.6e-67/hypothetical protein PGTG_02757 [Puccinia graminis f. sp. tritici CRL 75-36-700-3]	NA
PH560_00597-RA	KNZ63195.1/4.6e-37/hypothetical protein VP01_11756g1, partial [Puccinia sorghi]	NA
PH560_00585-RA	KNZ51673.1/3.1e-25/uncharacterized protein VP01_386g17 [Puccinia sorghi]	NA
PH560_00586-RA	KNZ45985.1/7.6e-29/hypothetical protein VP01_7648g2 [Puccinia sorghi]	NA
PH560_00600-RB	OAV95359.1/1.4e-199/hypothetical protein PTTG_12296 [Puccinia triticina 1-1 BBBD Race 1]	NA
PH560_00600-RA	OAV95359.1/2.0e-214/hypothetical protein PTTG_12296 [Puccinia triticina 1-1 BBBD Race 1]	NA
PH560_00599-RE	KNE91264.1/2.5e-53/hypothetical protein PSTG_15329 [Puccinia striiformis f. sp. tritici PST-78]	NA
PH560_00599-RD	KNE91264.1/4.1e-53/hypothetical protein PSTG_15329 [Puccinia striiformis f. sp. tritici PST-78]	NA
PH560_00599-RC	KNE91264.1/6.7e-53/hypothetical protein PSTG_15329 [Puccinia striiformis f. sp. tritici PST-78]	NA
PH560_00599-RB	KNE91264.1/1.7e-29/hypothetical protein PSTG_15329 [Puccinia striiformis f. sp. tritici PST-78]	NA
PH560_00599-RA	KNE91264.1/1.5e-21/hypothetical protein PSTG_15329 [Puccinia striiformis f. sp. tritici PST-78]	NA
PH560_00601-RA	KNZ63195.1/2.8e-40/hypothetical protein VP01_11756g1, partial [Puccinia sorghi]	NA
PH560_00598-RB	KNZ45985.1/1.6e-26/hypothetical protein VP01_7648g2 [Puccinia sorghi]	NA
PH560_00598-RA	KNZ45985.1/5.9e-23/hypothetical protein VP01_7648g2 [Puccinia sorghi]	NA
PH560_00607-RJ	XP_003323754.2/2.1e-179/hypothetical protein PGTG_05656 [Puccinia graminis f. sp. tritici CRL 75-36-700-3]	NA
PH560_00607-RK	XP_003323754.2/5.0e-238/hypothetical protein PGTG_05656 [Puccinia graminis f. sp. tritici CRL 75-36-700-3]	NA
PH560_00607-RD	KNE97617.1/1.5e-146/hypothetical protein PSTG_09166 [Puccinia striiformis f. sp. tritici PST-78]	NA
PH560_00607-RL	OAV90563.1/4.3e-135/hypothetical protein PTTG_28286 [Puccinia triticina 1-1 BBBD Race 1]	NA
PH560_00607-RB	KNE97617.1/3.6e-79/hypothetical protein PSTG_09166 [Puccinia striiformis f. sp. tritici PST-78]	NA
PH560_00607-RI	XP_003323754.2/6.5e-232/hypothetical protein PGTG_05656 [Puccinia graminis f. sp. tritici CRL 75-36-700-3]	NA
PH560_00607-RH	XP_003323754.2/3.3e-222/hypothetical protein PGTG_05656 [Puccinia graminis f. sp. tritici CRL 75-36-700-3]	NA
PH560_00607-RG	XP_003323754.2/6.0e-199/hypothetical protein PGTG_05656 [Puccinia graminis f. sp. tritici CRL 75-36-700-3]	NA
PH560_00607-RF	XP_003323754.2/3.9e-195/hypothetical protein PGTG_05656 [Puccinia graminis f. sp. tritici CRL 75-36-700-3]	NA
PH560_00607-RE	KNE97617.1/1.9e-158/hypothetical protein PSTG_09166 [Puccinia striiformis f. sp. tritici PST-78]	NA
PH560_00607-RC	KNE97617.1/1.5e-157/hypothetical protein PSTG_09166 [Puccinia striiformis f. sp. tritici PST-78]	NA
PH560_00607-RA	KNE97617.1/1.3e-84/hypothetical protein PSTG_09166 [Puccinia striiformis f. sp. tritici PST-78]	NA
PH560_00618-RC	OAV95359.1/3.4e-206/hypothetical protein PTTG_12296 [Puccinia triticina 1-1 BBBD Race 1]	NA
PH560_00618-RB	OAV95359.1/3.0e-210/hypothetical protein PTTG_12296 [Puccinia triticina 1-1 BBBD Race 1]	NA
PH560_00618-RA	OAV95373.1/1.4e-106/hypothetical protein PTTG_26658 [Puccinia triticina 1-1 BBBD Race 1]	NA
PH560_00616-RA	KNZ63808.1/9.4e-182/hypothetical protein VP01_109g7 [Puccinia sorghi]	sp|Q12337|YG21B_YEAST/8.1e-21/Transposon Ty2-GR1 Gag-Pol polyprotein OS=Saccharomyces cerevisiae (strain ATCC 204508 / S288c) GN=TY2B-GR1 PE=5 SV=2
PH560_00609-RA	KNE90709.1/3.7e-151/hypothetical protein PSTG_15860 [Puccinia striiformis f. sp. tritici PST-78]	NA
PH560_00609-RO	OAV91779.1/3.2e-118/hypothetical protein PTTG_27879 [Puccinia triticina 1-1 BBBD Race 1]	NA
PH560_00609-RN	KNZ60037.1/2.3e-121/hypothetical protein VP01_1622g4 [Puccinia sorghi]	NA
PH560_00609-RF	KNF02339.1/3.1e-114/hypothetical protein PSTG_04543 [Puccinia striiformis f. sp. tritici PST-78]	NA
PH560_00609-RD	KNE90709.1/2.7e-139/hypothetical protein PSTG_15860 [Puccinia striiformis f. sp. tritici PST-78]	NA
PH560_00609-RE	KNF02339.1/5.9e-104/hypothetical protein PSTG_04543 [Puccinia striiformis f. sp. tritici PST-78]	NA
PH560_00609-RK	KNF02339.1/3.0e-100/hypothetical protein PSTG_04543 [Puccinia striiformis f. sp. tritici PST-78]	NA
PH560_00609-RM	XP_003325045.2/1.1e-97/hypothetical protein PGTG_06582 [Puccinia graminis f. sp. tritici CRL 75-36-700-3]	NA
PH560_00609-RL	OAV91779.1/1.7e-89/hypothetical protein PTTG_27879 [Puccinia triticina 1-1 BBBD Race 1]	NA
PH560_00609-RR	OAV98668.1/6.0e-127/hypothetical protein PTTG_25616 [Puccinia triticina 1-1 BBBD Race 1]	NA
PH560_00609-RI	KNF02339.1/7.1e-85/hypothetical protein PSTG_04543 [Puccinia striiformis f. sp. tritici PST-78]	NA
PH560_00609-RJ	OAV91779.1/1.1e-96/hypothetical protein PTTG_27879 [Puccinia triticina 1-1 BBBD Race 1]	NA
PH560_00609-RG	KNF02339.1/1.3e-86/hypothetical protein PSTG_04543 [Puccinia striiformis f. sp. tritici PST-78]	NA
PH560_00609-RH	OAV91779.1/6.8e-82/hypothetical protein PTTG_27879 [Puccinia triticina 1-1 BBBD Race 1]	NA
PH560_00609-RQ	KNZ60037.1/6.6e-103/hypothetical protein VP01_1622g4 [Puccinia sorghi]	NA
PH560_00609-RC	KNE90709.1/5.8e-100/hypothetical protein PSTG_15860 [Puccinia striiformis f. sp. tritici PST-78]	NA
PH560_00609-RB	KNE90709.1/3.0e-73/hypothetical protein PSTG_15860 [Puccinia striiformis f. sp. tritici PST-78]	NA
PH560_00609-RP	XP_003325045.2/1.6e-98/hypothetical protein PGTG_06582 [Puccinia graminis f. sp. tritici CRL 75-36-700-3]	NA
PH560_00611-RC	OAV97161.1/2.6e-199/hypothetical protein PTTG_26163 [Puccinia triticina 1-1 BBBD Race 1]	NA
PH560_00611-RB	OAV97161.1/1.2e-196/hypothetical protein PTTG_26163 [Puccinia triticina 1-1 BBBD Race 1]	NA
PH560_00611-RA	OAV97161.1/6.5e-195/hypothetical protein PTTG_26163 [Puccinia triticina 1-1 BBBD Race 1]	NA
PH560_00611-RD	OAV97161.1/9.0e-141/hypothetical protein PTTG_26163 [Puccinia triticina 1-1 BBBD Race 1]	NA
PH560_00611-RE	OAV97161.1/1.6e-80/hypothetical protein PTTG_26163 [Puccinia triticina 1-1 BBBD Race 1]	NA
PH560_00613-RA	XP_003889256.1/1.3e-77/hypothetical protein PGTG_22034 [Puccinia graminis f. sp. tritici CRL 75-36-700-3]	NA
PH560_00619-RC	OAV87864.1/7.9e-69/hypothetical protein PTTG_01073 [Puccinia triticina 1-1 BBBD Race 1]	NA
PH560_00619-RB	XP_003326208.2/2.2e-48/hypothetical protein PGTG_08038 [Puccinia graminis f. sp. tritici CRL 75-36-700-3]	NA
PH560_00619-RA	XP_003326208.2/1.6e-34/hypothetical protein PGTG_08038 [Puccinia graminis f. sp. tritici CRL 75-36-700-3]	NA
PH560_00619-RF	KNZ64272.1/4.4e-24/hypothetical protein VP01_10499g1, partial [Puccinia sorghi]	NA
PH560_00619-RE	KNZ64272.1/2.6e-26/hypothetical protein VP01_10499g1, partial [Puccinia sorghi]	NA
PH560_00619-RD	NA	NA
PH560_00621-RE	KNF06054.1/7.2e-128/hypothetical protein PSTG_00569 [Puccinia striiformis f. sp. tritici PST-78]	NA
PH560_00621-RB	KNE90011.1/2.5e-64/hypothetical protein PSTG_16529 [Puccinia striiformis f. sp. tritici PST-78]	NA
PH560_00621-RF	XP_003321958.1/9.3e-131/hypothetical protein PGTG_03495 [Puccinia graminis f. sp. tritici CRL 75-36-700-3]	NA
PH560_00621-RD	KNE90011.1/1.5e-118/hypothetical protein PSTG_16529 [Puccinia striiformis f. sp. tritici PST-78]	NA
PH560_00621-RC	KNE90011.1/2.4e-99/hypothetical protein PSTG_16529 [Puccinia striiformis f. sp. tritici PST-78]	NA
PH560_00621-RH	KNE88792.1/9.8e-119/hypothetical protein PSTG_17784, partial [Puccinia striiformis f. sp. tritici PST-78]	NA
PH560_00621-RG	KNE88792.1/1.0e-117/hypothetical protein PSTG_17784, partial [Puccinia striiformis f. sp. tritici PST-78]	NA
PH560_00621-RA	KNE90011.1/5.5e-61/hypothetical protein PSTG_16529 [Puccinia striiformis f. sp. tritici PST-78]	NA
PH560_00621-RJ	NA	NA
PH560_00621-RK	KNF02362.1/7.9e-64/hypothetical protein PSTG_04270 [Puccinia striiformis f. sp. tritici PST-78]	NA
PH560_00610-RC	OAV97992.1/4.3e-124/hypothetical protein PTTG_25904 [Puccinia triticina 1-1 BBBD Race 1]	NA
PH560_00610-RE	OAV97992.1/2.4e-100/hypothetical protein PTTG_25904 [Puccinia triticina 1-1 BBBD Race 1]	NA
PH560_00610-RD	OAV97992.1/1.5e-138/hypothetical protein PTTG_25904 [Puccinia triticina 1-1 BBBD Race 1]	NA
PH560_00610-RB	KNF00870.1/2.0e-96/hypothetical protein PSTG_06006 [Puccinia striiformis f. sp. tritici PST-78]	NA
PH560_00610-RA	OAV97992.1/3.6e-90/hypothetical protein PTTG_25904 [Puccinia triticina 1-1 BBBD Race 1]	NA
PH560_00610-RJ	OAV97992.1/1.3e-47/hypothetical protein PTTG_25904 [Puccinia triticina 1-1 BBBD Race 1]	NA
PH560_00610-RI	OAV97992.1/3.7e-47/hypothetical protein PTTG_25904 [Puccinia triticina 1-1 BBBD Race 1]	NA
PH560_00610-RG	KNZ51273.1/1.8e-13/hypothetical protein VP01_4012g1 [Puccinia sorghi]	NA
PH560_00610-RF	KNZ51273.1/6.8e-11/hypothetical protein VP01_4012g1 [Puccinia sorghi]	NA
PH560_00610-RH	XP_003331549.2/2.3e-08/hypothetical protein PGTG_13349 [Puccinia graminis f. sp. tritici CRL 75-36-700-3]	NA
PH560_00615-RA	KNZ49246.1/8.1e-78/hypothetical protein VP01_512g10 [Puccinia sorghi]	NA
PH560_00615-RB	KNZ49246.1/1.2e-75/hypothetical protein VP01_512g10 [Puccinia sorghi]	NA
PH560_00615-RC	KNZ49246.1/1.1e-46/hypothetical protein VP01_512g10 [Puccinia sorghi]	NA
PH560_00615-RD	KNZ47585.1/1.9e-29/hypothetical protein VP01_62g20 [Puccinia sorghi]	NA
PH560_00617-RA	KNZ49243.1/9.5e-121/hypothetical protein VP01_512g7 [Puccinia sorghi]	sp|P47024|YJ41B_YEAST/6.0e-11/Transposon Ty4-J Gag-Pol polyprotein OS=Saccharomyces cerevisiae (strain ATCC 204508 / S288c) GN=TY4B-J PE=3 SV=3
PH560_00617-RB	KNZ49243.1/1.1e-50/hypothetical protein VP01_512g7 [Puccinia sorghi]	NA
PH560_00617-RC	KNZ49243.1/2.5e-47/hypothetical protein VP01_512g7 [Puccinia sorghi]	NA
PH560_00606-RA	KNE93746.1/3.6e-35/hypothetical protein PSTG_12849 [Puccinia striiformis f. sp. tritici PST-78]	NA
PH560_00606-RB	KNE93746.1/3.7e-23/hypothetical protein PSTG_12849 [Puccinia striiformis f. sp. tritici PST-78]	NA
PH560_00603-RA	KNZ48421.1/1.5e-26/uncharacterized protein VP01_5682g1, partial [Puccinia sorghi]	NA
PH560_00602-RA	KNZ45985.1/2.3e-26/hypothetical protein VP01_7648g2 [Puccinia sorghi]	NA
PH560_00605-RA	KNE91264.1/2.3e-25/hypothetical protein PSTG_15329 [Puccinia striiformis f. sp. tritici PST-78]	NA
PH560_00608-RA	OAV97491.1/1.0e-06/hypothetical protein PTTG_10547 [Puccinia triticina 1-1 BBBD Race 1]	NA
PH560_00604-RA	NA	NA
PH560_00620-RA	KNE87326.1/1.3e-09/hypothetical protein PSTG_19292, partial [Puccinia striiformis f. sp. tritici PST-78]	NA
PH560_00614-RA	XP_003329560.2/2.5e-15/hypothetical protein PGTG_11310 [Puccinia graminis f. sp. tritici CRL 75-36-700-3]	NA
PH560_00612-RA	NA	NA
PH560_00622-RA	XP_003888756.1/2.6e-163/hypothetical protein PGTG_22484 [Puccinia graminis f. sp. tritici CRL 75-36-700-3]	NA
PH560_00622-RB	XP_003888756.1/8.4e-173/hypothetical protein PGTG_22484 [Puccinia graminis f. sp. tritici CRL 75-36-700-3]	NA
PH560_00637-RA	OAV92204.1/2.9e-235/hypothetical protein PTTG_27698 [Puccinia triticina 1-1 BBBD Race 1]	NA
PH560_00637-RB	KNZ49274.1/1.3e-87/hypothetical protein VP01_510g11 [Puccinia sorghi]	NA
PH560_00637-RC	KNZ44460.1/3.5e-204/hypothetical protein VP01_914g3 [Puccinia sorghi]	NA
PH560_00637-RD	XP_003330750.2/6.1e-186/hypothetical protein PGTG_12287 [Puccinia graminis f. sp. tritici CRL 75-36-700-3]	NA
PH560_00637-RE	XP_003330750.2/3.7e-70/hypothetical protein PGTG_12287 [Puccinia graminis f. sp. tritici CRL 75-36-700-3]	NA
PH560_00631-RB	KNZ47082.1/4.4e-228/hypothetical protein VP01_66g14 [Puccinia sorghi]	sp|P0C2J7|YH41B_YEAST/1.0e-19/Transposon Ty4-H Gag-Pol polyprotein OS=Saccharomyces cerevisiae (strain ATCC 204508 / S288c) GN=TY4B-H PE=1 SV=1
PH560_00631-RA	KNZ60563.1/4.1e-129/hypothetical protein VP01_1536g6 [Puccinia sorghi]	sp|P47024|YJ41B_YEAST/8.4e-18/Transposon Ty4-J Gag-Pol polyprotein OS=Saccharomyces cerevisiae (strain ATCC 204508 / S288c) GN=TY4B-J PE=3 SV=3
PH560_00630-RA	OAV95388.1/2.0e-282/hypothetical protein PTTG_05441 [Puccinia triticina 1-1 BBBD Race 1]	sp|Q12300|RGT2_YEAST/5.9e-114/High-affinity glucose transporter RGT2 OS=Saccharomyces cerevisiae (strain ATCC 204508 / S288c) GN=RGT2 PE=1 SV=1
PH560_00630-RB	OAV95388.1/2.5e-163/hypothetical protein PTTG_05441 [Puccinia triticina 1-1 BBBD Race 1]	sp|Q12300|RGT2_YEAST/1.4e-67/High-affinity glucose transporter RGT2 OS=Saccharomyces cerevisiae (strain ATCC 204508 / S288c) GN=RGT2 PE=1 SV=1
PH560_00630-RC	OAV95388.1/4.8e-159/hypothetical protein PTTG_05441 [Puccinia triticina 1-1 BBBD Race 1]	sp|Q12300|RGT2_YEAST/2.7e-66/High-affinity glucose transporter RGT2 OS=Saccharomyces cerevisiae (strain ATCC 204508 / S288c) GN=RGT2 PE=1 SV=1
PH560_00630-RD	OAV95388.1/8.0e-75/hypothetical protein PTTG_05441 [Puccinia triticina 1-1 BBBD Race 1]	sp|Q12300|RGT2_YEAST/2.1e-35/High-affinity glucose transporter RGT2 OS=Saccharomyces cerevisiae (strain ATCC 204508 / S288c) GN=RGT2 PE=1 SV=1
PH560_00630-RE	OAV95388.1/1.3e-45/hypothetical protein PTTG_05441 [Puccinia triticina 1-1 BBBD Race 1]	sp|Q12300|RGT2_YEAST/1.1e-22/High-affinity glucose transporter RGT2 OS=Saccharomyces cerevisiae (strain ATCC 204508 / S288c) GN=RGT2 PE=1 SV=1
PH560_00634-RA	XP_003889256.1/1.4e-79/hypothetical protein PGTG_22034 [Puccinia graminis f. sp. tritici CRL 75-36-700-3]	sp|Q2HEW5|CHG2_CHAGB/1.1e-09/PKS-NRPS hybrid synthetase CHGG_01239 OS=Chaetomium globosum (strain ATCC 6205 / CBS 148.51 / DSM 1962 / NBRC 6347 / NRRL 1970) GN=CHGG_01239 PE=3 SV=1
PH560_00627-RA	KNF06644.1/4.1e-93/hypothetical protein PSTG_00518 [Puccinia striiformis f. sp. tritici PST-78]	NA
PH560_00627-RB	KNF06644.1/4.7e-103/hypothetical protein PSTG_00518 [Puccinia striiformis f. sp. tritici PST-78]	NA
PH560_00629-RA	OAV89808.1/3.6e-51/hypothetical protein PTTG_28526, partial [Puccinia triticina 1-1 BBBD Race 1]	NA
PH560_00629-RB	OAV89808.1/3.3e-51/hypothetical protein PTTG_28526, partial [Puccinia triticina 1-1 BBBD Race 1]	NA
PH560_00629-RC	OAV89808.1/4.7e-47/hypothetical protein PTTG_28526, partial [Puccinia triticina 1-1 BBBD Race 1]	NA
PH560_00628-RB	KNE89024.1/1.3e-125/hypothetical protein PSTG_17519, partial [Puccinia striiformis f. sp. tritici PST-78]	NA
PH560_00628-RA	KNE99067.1/1.1e-110/hypothetical protein PSTG_07718 [Puccinia striiformis f. sp. tritici PST-78]	NA
PH560_00628-RC	KNE96180.1/2.9e-77/hypothetical protein PSTG_10595 [Puccinia striiformis f. sp. tritici PST-78]	NA
PH560_00638-RD	OAV91946.1/3.3e-72/hypothetical protein PTTG_27813 [Puccinia triticina 1-1 BBBD Race 1]	NA
PH560_00638-RF	KNZ44459.1/4.3e-106/hypothetical protein VP01_914g2 [Puccinia sorghi]	NA
PH560_00638-RE	XP_003335553.1/2.8e-75/hypothetical protein PGTG_16879 [Puccinia graminis f. sp. tritici CRL 75-36-700-3]	NA
PH560_00638-RA	XP_003335553.1/3.9e-31/hypothetical protein PGTG_16879 [Puccinia graminis f. sp. tritici CRL 75-36-700-3]	NA
PH560_00638-RC	XP_003335553.1/5.3e-48/hypothetical protein PGTG_16879 [Puccinia graminis f. sp. tritici CRL 75-36-700-3]	NA
PH560_00638-RB	XP_003335553.1/1.0e-28/hypothetical protein PGTG_16879 [Puccinia graminis f. sp. tritici CRL 75-36-700-3]	NA
PH560_00633-RA	KNE88595.1/2.9e-70/hypothetical protein PSTG_17987 [Puccinia striiformis f. sp. tritici PST-78]	NA
PH560_00626-RB	KNZ46047.1/7.4e-45/hypothetical protein VP01_7605g1 [Puccinia sorghi]	NA
PH560_00626-RC	KNE91264.1/1.3e-44/hypothetical protein PSTG_15329 [Puccinia striiformis f. sp. tritici PST-78]	NA
PH560_00626-RA	KNE91264.1/2.9e-47/hypothetical protein PSTG_15329 [Puccinia striiformis f. sp. tritici PST-78]	NA
PH560_00626-RD	KNE91264.1/3.1e-46/hypothetical protein PSTG_15329 [Puccinia striiformis f. sp. tritici PST-78]	NA
PH560_00626-RE	KNE91264.1/3.6e-46/hypothetical protein PSTG_15329 [Puccinia striiformis f. sp. tritici PST-78]	NA
PH560_00636-RB	XP_003325723.1/3.4e-92/hypothetical protein PGTG_06925 [Puccinia graminis f. sp. tritici CRL 75-36-700-3]	NA
PH560_00636-RE	NA	NA
PH560_00636-RA	XP_003325723.1/8.2e-111/hypothetical protein PGTG_06925 [Puccinia graminis f. sp. tritici CRL 75-36-700-3]	NA
PH560_00636-RC	XP_003325723.1/2.2e-108/hypothetical protein PGTG_06925 [Puccinia graminis f. sp. tritici CRL 75-36-700-3]	NA
PH560_00636-RF	XP_003325723.1/4.1e-77/hypothetical protein PGTG_06925 [Puccinia graminis f. sp. tritici CRL 75-36-700-3]	NA
PH560_00636-RD	NA	NA
PH560_00625-RA	KNE91264.1/8.1e-46/hypothetical protein PSTG_15329 [Puccinia striiformis f. sp. tritici PST-78]	NA
PH560_00632-RA	KNZ49530.1/2.6e-57/hypothetical protein VP01_495g5 [Puccinia sorghi]	sp|P0C2J7|YH41B_YEAST/3.1e-07/Transposon Ty4-H Gag-Pol polyprotein OS=Saccharomyces cerevisiae (strain ATCC 204508 / S288c) GN=TY4B-H PE=1 SV=1
PH560_00632-RB	KNZ61621.1/4.5e-224/hypothetical protein VP01_1377g1 [Puccinia sorghi]	sp|P0C2J7|YH41B_YEAST/7.2e-09/Transposon Ty4-H Gag-Pol polyprotein OS=Saccharomyces cerevisiae (strain ATCC 204508 / S288c) GN=TY4B-H PE=1 SV=1
PH560_00639-RB	KNZ61621.1/1.4e-24/hypothetical protein VP01_1377g1 [Puccinia sorghi]	NA
PH560_00639-RA	KNZ47082.1/9.6e-16/hypothetical protein VP01_66g14 [Puccinia sorghi]	NA
PH560_00624-RA	NA	NA
PH560_00635-RA	XP_003329560.2/2.5e-15/hypothetical protein PGTG_11310 [Puccinia graminis f. sp. tritici CRL 75-36-700-3]	NA
PH560_00653-RB	OAV95392.1/0.0e+00/hypothetical protein PTTG_05445 [Puccinia triticina 1-1 BBBD Race 1]	NA
PH560_00653-RA	OAV95392.1/1.4e-232/hypothetical protein PTTG_05445 [Puccinia triticina 1-1 BBBD Race 1]	NA
PH560_00653-RC	OAV95392.1/3.1e-39/hypothetical protein PTTG_05445 [Puccinia triticina 1-1 BBBD Race 1]	NA
PH560_00651-RA	OAV97104.1/0.0e+00/hypothetical protein PTTG_05512 [Puccinia triticina 1-1 BBBD Race 1]	sp|P53134|YGL4_YEAST/3.7e-29/Putative oligopeptide transporter YGL114W OS=Saccharomyces cerevisiae (strain ATCC 204508 / S288c) GN=YGL114W PE=1 SV=1
PH560_00645-RA	XP_003889256.1/8.8e-79/hypothetical protein PGTG_22034 [Puccinia graminis f. sp. tritici CRL 75-36-700-3]	sp|Q2HEW5|CHG2_CHAGB/1.1e-09/PKS-NRPS hybrid synthetase CHGG_01239 OS=Chaetomium globosum (strain ATCC 6205 / CBS 148.51 / DSM 1962 / NBRC 6347 / NRRL 1970) GN=CHGG_01239 PE=3 SV=1
PH560_00652-RA	OAV88783.1/7.8e-58/hypothetical protein PTTG_28916 [Puccinia triticina 1-1 BBBD Race 1]	NA
PH560_00650-RA	KNF05926.1/4.5e-169/hypothetical protein PSTG_00919 [Puccinia striiformis f. sp. tritici PST-78]	NA
PH560_00650-RB	OAV95389.1/1.4e-68/hypothetical protein PTTG_05442 [Puccinia triticina 1-1 BBBD Race 1]	NA
PH560_00654-RA	OAV95393.1/3.1e-100/hypothetical protein PTTG_05446 [Puccinia triticina 1-1 BBBD Race 1]	sp|Q4I8X0|TRM10_GIBZE/4.4e-14/tRNA (guanine(9)-N1)-methyltransferase OS=Gibberella zeae (strain PH-1 / ATCC MYA-4620 / FGSC 9075 / NRRL 31084) GN=TRM10 PE=3 SV=1
PH560_00646-RB	XP_003329560.2/7.1e-57/hypothetical protein PGTG_11310 [Puccinia graminis f. sp. tritici CRL 75-36-700-3]	NA
PH560_00646-RA	XP_003329560.2/5.6e-15/hypothetical protein PGTG_11310 [Puccinia graminis f. sp. tritici CRL 75-36-700-3]	NA
PH560_00648-RC	OAV95390.1/1.2e-132/hypothetical protein PTTG_05443 [Puccinia triticina 1-1 BBBD Race 1]	sp|C8VTS4|VELB_EMENI/3.2e-45/Velvet complex subunit B OS=Emericella nidulans (strain FGSC A4 / ATCC 38163 / CBS 112.46 / NRRL 194 / M139) GN=velB PE=1 SV=1
PH560_00648-RB	OAV95390.1/7.1e-122/hypothetical protein PTTG_05443 [Puccinia triticina 1-1 BBBD Race 1]	sp|C8VTS4|VELB_EMENI/6.4e-43/Velvet complex subunit B OS=Emericella nidulans (strain FGSC A4 / ATCC 38163 / CBS 112.46 / NRRL 194 / M139) GN=velB PE=1 SV=1
PH560_00648-RA	OAV95390.1/6.6e-109/hypothetical protein PTTG_05443 [Puccinia triticina 1-1 BBBD Race 1]	sp|C8VTS4|VELB_EMENI/4.1e-39/Velvet complex subunit B OS=Emericella nidulans (strain FGSC A4 / ATCC 38163 / CBS 112.46 / NRRL 194 / M139) GN=velB PE=1 SV=1
PH560_00644-RA	KNE88595.1/3.8e-70/hypothetical protein PSTG_17987 [Puccinia striiformis f. sp. tritici PST-78]	NA
PH560_00644-RB	KNE88595.1/1.9e-31/hypothetical protein PSTG_17987 [Puccinia striiformis f. sp. tritici PST-78]	NA
PH560_00640-RB	KNE91264.1/1.2e-53/hypothetical protein PSTG_15329 [Puccinia striiformis f. sp. tritici PST-78]	NA
PH560_00640-RC	KNE91264.1/1.8e-19/hypothetical protein PSTG_15329 [Puccinia striiformis f. sp. tritici PST-78]	NA
PH560_00640-RA	KNE91264.1/3.9e-20/hypothetical protein PSTG_15329 [Puccinia striiformis f. sp. tritici PST-78]	NA
PH560_00649-RA	OAV88380.1/1.4e-94/hypothetical protein PTTG_08197 [Puccinia triticina 1-1 BBBD Race 1]	sp|Q9Y7L0|SEC22_SCHPO/4.7e-15/Protein transport protein sec22 OS=Schizosaccharomyces pombe (strain 972 / ATCC 24843) GN=sec22 PE=3 SV=2
PH560_00641-RB	KNE91264.1/2.2e-43/hypothetical protein PSTG_15329 [Puccinia striiformis f. sp. tritici PST-78]	NA
PH560_00641-RA	KNE91264.1/3.0e-45/hypothetical protein PSTG_15329 [Puccinia striiformis f. sp. tritici PST-78]	NA
PH560_00641-RD	KNZ45985.1/2.7e-28/hypothetical protein VP01_7648g2 [Puccinia sorghi]	NA
PH560_00641-RC	KNZ45985.1/7.6e-30/hypothetical protein VP01_7648g2 [Puccinia sorghi]	NA
PH560_00647-RB	KNZ62069.1/1.9e-20/hypothetical protein VP01_13183g1 [Puccinia sorghi]	NA
PH560_00647-RA	NA	NA
PH560_00642-RA	KNZ63204.1/6.2e-08/hypothetical protein VP01_11735g1 [Puccinia sorghi]	NA
PH560_00643-RA	NA	NA
PH560_00655-RB	OAV95396.1/0.0e+00/hypothetical protein PTTG_26664 [Puccinia triticina 1-1 BBBD Race 1]	sp|Q02099|RAD3_SCHPO/1.0e-220/Protein kinase rad3 OS=Schizosaccharomyces pombe (strain 972 / ATCC 24843) GN=rad3 PE=1 SV=2
PH560_00655-RC	OAV95396.1/0.0e+00/hypothetical protein PTTG_26664 [Puccinia triticina 1-1 BBBD Race 1]	sp|Q02099|RAD3_SCHPO/7.7e-221/Protein kinase rad3 OS=Schizosaccharomyces pombe (strain 972 / ATCC 24843) GN=rad3 PE=1 SV=2
PH560_00655-RA	OAV95396.1/0.0e+00/hypothetical protein PTTG_26664 [Puccinia triticina 1-1 BBBD Race 1]	sp|Q02099|RAD3_SCHPO/4.3e-149/Protein kinase rad3 OS=Schizosaccharomyces pombe (strain 972 / ATCC 24843) GN=rad3 PE=1 SV=2
PH560_00655-RF	OAV95396.1/1.9e-134/hypothetical protein PTTG_26664 [Puccinia triticina 1-1 BBBD Race 1]	NA
PH560_00655-RH	XP_003330541.1/0.0e+00/hypothetical protein PGTG_12078 [Puccinia graminis f. sp. tritici CRL 75-36-700-3]	sp|Q02099|RAD3_SCHPO/3.7e-42/Protein kinase rad3 OS=Schizosaccharomyces pombe (strain 972 / ATCC 24843) GN=rad3 PE=1 SV=2
PH560_00655-RI	XP_003330541.1/0.0e+00/hypothetical protein PGTG_12078 [Puccinia graminis f. sp. tritici CRL 75-36-700-3]	sp|Q02099|RAD3_SCHPO/4.2e-43/Protein kinase rad3 OS=Schizosaccharomyces pombe (strain 972 / ATCC 24843) GN=rad3 PE=1 SV=2
PH560_00655-RJ	XP_003330541.1/8.4e-210/hypothetical protein PGTG_12078 [Puccinia graminis f. sp. tritici CRL 75-36-700-3]	sp|Q02099|RAD3_SCHPO/5.6e-25/Protein kinase rad3 OS=Schizosaccharomyces pombe (strain 972 / ATCC 24843) GN=rad3 PE=1 SV=2
PH560_00655-RG	OAV95396.1/9.3e-93/hypothetical protein PTTG_26664 [Puccinia triticina 1-1 BBBD Race 1]	NA
PH560_00655-RD	OAV95396.1/7.9e-257/hypothetical protein PTTG_26664 [Puccinia triticina 1-1 BBBD Race 1]	NA
PH560_00655-RE	OAV95396.1/1.4e-216/hypothetical protein PTTG_26664 [Puccinia triticina 1-1 BBBD Race 1]	NA
PH560_00655-RK	XP_003330541.1/5.7e-200/hypothetical protein PGTG_12078 [Puccinia graminis f. sp. tritici CRL 75-36-700-3]	sp|Q02099|RAD3_SCHPO/5.2e-25/Protein kinase rad3 OS=Schizosaccharomyces pombe (strain 972 / ATCC 24843) GN=rad3 PE=1 SV=2
PH560_00655-RL	XP_003330541.1/7.8e-191/hypothetical protein PGTG_12078 [Puccinia graminis f. sp. tritici CRL 75-36-700-3]	sp|Q02099|RAD3_SCHPO/5.0e-25/Protein kinase rad3 OS=Schizosaccharomyces pombe (strain 972 / ATCC 24843) GN=rad3 PE=1 SV=2
PH560_00655-RM	XP_003330541.1/3.0e-119/hypothetical protein PGTG_12078 [Puccinia graminis f. sp. tritici CRL 75-36-700-3]	sp|Q02099|RAD3_SCHPO/1.2e-21/Protein kinase rad3 OS=Schizosaccharomyces pombe (strain 972 / ATCC 24843) GN=rad3 PE=1 SV=2
PH560_00664-RC	OAV95403.1/0.0e+00/hypothetical protein PTTG_05454 [Puccinia triticina 1-1 BBBD Race 1]	sp|Q9UUJ6|NED1_SCHPO/1.1e-89/Nuclear elongation and deformation protein 1 OS=Schizosaccharomyces pombe (strain 972 / ATCC 24843) GN=ned1 PE=1 SV=1
PH560_00664-RB	OAV95403.1/0.0e+00/hypothetical protein PTTG_05454 [Puccinia triticina 1-1 BBBD Race 1]	sp|Q9UUJ6|NED1_SCHPO/3.3e-91/Nuclear elongation and deformation protein 1 OS=Schizosaccharomyces pombe (strain 972 / ATCC 24843) GN=ned1 PE=1 SV=1
PH560_00664-RA	OAV95403.1/0.0e+00/hypothetical protein PTTG_05454 [Puccinia triticina 1-1 BBBD Race 1]	sp|Q9UUJ6|NED1_SCHPO/5.3e-25/Nuclear elongation and deformation protein 1 OS=Schizosaccharomyces pombe (strain 972 / ATCC 24843) GN=ned1 PE=1 SV=1
PH560_00667-RE	KNZ55400.1/0.0e+00/hypothetical protein VP01_2694g2 [Puccinia sorghi]	sp|Q12472|YD21B_YEAST/3.6e-27/Transposon Ty2-DR1 Gag-Pol polyprotein OS=Saccharomyces cerevisiae (strain ATCC 204508 / S288c) GN=TY2B-DR1 PE=1 SV=3
PH560_00667-RF	KNZ62523.1/0.0e+00/hypothetical protein VP01_125g8 [Puccinia sorghi]	sp|P0C2J5|YL22B_YEAST/1.4e-27/Transposon Ty2-LR2 Gag-Pol polyprotein OS=Saccharomyces cerevisiae (strain ATCC 204508 / S288c) GN=TY2B-LR2 PE=5 SV=1
PH560_00667-RD	KNZ55400.1/1.1e-240/hypothetical protein VP01_2694g2 [Puccinia sorghi]	sp|P0C2J7|YH41B_YEAST/5.6e-27/Transposon Ty4-H Gag-Pol polyprotein OS=Saccharomyces cerevisiae (strain ATCC 204508 / S288c) GN=TY4B-H PE=1 SV=1
PH560_00667-RC	KNZ47082.1/3.8e-129/hypothetical protein VP01_66g14 [Puccinia sorghi]	sp|P47024|YJ41B_YEAST/1.4e-14/Transposon Ty4-J Gag-Pol polyprotein OS=Saccharomyces cerevisiae (strain ATCC 204508 / S288c) GN=TY4B-J PE=3 SV=3
PH560_00667-RI	KNZ62523.1/0.0e+00/hypothetical protein VP01_125g8 [Puccinia sorghi]	sp|P0C2J7|YH41B_YEAST/1.1e-26/Transposon Ty4-H Gag-Pol polyprotein OS=Saccharomyces cerevisiae (strain ATCC 204508 / S288c) GN=TY4B-H PE=1 SV=1
PH560_00667-RH	KNZ62523.1/0.0e+00/hypothetical protein VP01_125g8 [Puccinia sorghi]	sp|P0C2J7|YH41B_YEAST/1.0e-26/Transposon Ty4-H Gag-Pol polyprotein OS=Saccharomyces cerevisiae (strain ATCC 204508 / S288c) GN=TY4B-H PE=1 SV=1
PH560_00667-RG	KNZ62523.1/0.0e+00/hypothetical protein VP01_125g8 [Puccinia sorghi]	sp|P0C2J7|YH41B_YEAST/9.5e-27/Transposon Ty4-H Gag-Pol polyprotein OS=Saccharomyces cerevisiae (strain ATCC 204508 / S288c) GN=TY4B-H PE=1 SV=1
PH560_00667-RB	KNZ55400.1/1.6e-176/hypothetical protein VP01_2694g2 [Puccinia sorghi]	sp|P47024|YJ41B_YEAST/1.5e-25/Transposon Ty4-J Gag-Pol polyprotein OS=Saccharomyces cerevisiae (strain ATCC 204508 / S288c) GN=TY4B-J PE=3 SV=3
PH560_00667-RA	KNZ55344.1/6.5e-43/hypothetical protein VP01_2704g6 [Puccinia sorghi]	NA
PH560_00667-RJ	NA	NA
PH560_00656-RC	OAV95400.1/0.0e+00/hypothetical protein PTTG_05451 [Puccinia triticina 1-1 BBBD Race 1]	sp|L8FSM5|SUB2_PSED2/2.3e-10/Subtilisin-like protease 2 OS=Pseudogymnoascus destructans (strain ATCC MYA-4855 / 20631-21) GN=SP2 PE=1 SV=1
PH560_00656-RD	OAV95400.1/0.0e+00/hypothetical protein PTTG_05451 [Puccinia triticina 1-1 BBBD Race 1]	sp|L8FSM5|SUB2_PSED2/2.2e-10/Subtilisin-like protease 2 OS=Pseudogymnoascus destructans (strain ATCC MYA-4855 / 20631-21) GN=SP2 PE=1 SV=1
PH560_00656-RB	OAV95400.1/0.0e+00/hypothetical protein PTTG_05451 [Puccinia triticina 1-1 BBBD Race 1]	sp|L8FSM5|SUB2_PSED2/2.0e-10/Subtilisin-like protease 2 OS=Pseudogymnoascus destructans (strain ATCC MYA-4855 / 20631-21) GN=SP2 PE=1 SV=1
PH560_00656-RE	OAV95400.1/1.6e-265/hypothetical protein PTTG_05451 [Puccinia triticina 1-1 BBBD Race 1]	NA
PH560_00656-RA	OAV95400.1/4.5e-273/hypothetical protein PTTG_05451 [Puccinia triticina 1-1 BBBD Race 1]	sp|L8FSM5|SUB2_PSED2/3.6e-09/Subtilisin-like protease 2 OS=Pseudogymnoascus destructans (strain ATCC MYA-4855 / 20631-21) GN=SP2 PE=1 SV=1
PH560_00656-RF	OAV95400.1/2.5e-108/hypothetical protein PTTG_05451 [Puccinia triticina 1-1 BBBD Race 1]	NA
PH560_00668-RA	OAV92445.1/0.0e+00/hypothetical protein PTTG_07163 [Puccinia triticina 1-1 BBBD Race 1]	sp|Q5A960|HDA1_CANAL/3.8e-102/Histone deacetylase HDA1 OS=Candida albicans (strain SC5314 / ATCC MYA-2876) GN=HDA1 PE=1 SV=1
PH560_00658-RA	XP_003890066.1/1.0e-56/hypothetical protein PGTG_21349 [Puccinia graminis f. sp. tritici CRL 75-36-700-3]	NA
PH560_00658-RB	XP_003890066.1/5.9e-56/hypothetical protein PGTG_21349 [Puccinia graminis f. sp. tritici CRL 75-36-700-3]	NA
PH560_00657-RA	OAV95401.1/6.1e-197/hypothetical protein PTTG_05452 [Puccinia triticina 1-1 BBBD Race 1]	NA
PH560_00657-RB	OAV95401.1/6.2e-108/hypothetical protein PTTG_05452 [Puccinia triticina 1-1 BBBD Race 1]	NA
PH560_00661-RA	XP_003889256.1/6.3e-77/hypothetical protein PGTG_22034 [Puccinia graminis f. sp. tritici CRL 75-36-700-3]	sp|Q2HEW5|CHG2_CHAGB/6.4e-10/PKS-NRPS hybrid synthetase CHGG_01239 OS=Chaetomium globosum (strain ATCC 6205 / CBS 148.51 / DSM 1962 / NBRC 6347 / NRRL 1970) GN=CHGG_01239 PE=3 SV=1
PH560_00669-RA	OAV95410.1/1.8e-171/hypothetical protein PTTG_05458 [Puccinia triticina 1-1 BBBD Race 1]	NA
PH560_00659-RA	XP_003330534.1/2.4e-218/glutamine synthetase [Puccinia graminis f. sp. tritici CRL 75-36-700-3]	sp|Q96UV5|GLNA_HEBCY/1.5e-159/Glutamine synthetase OS=Hebeloma cylindrosporum GN=GLN1 PE=2 SV=1
PH560_00665-RC	KNF01584.1/1.6e-64/hypothetical protein PSTG_05362 [Puccinia striiformis f. sp. tritici PST-78]	NA
PH560_00665-RB	KNE92679.1/1.4e-50/hypothetical protein PSTG_13892 [Puccinia striiformis f. sp. tritici PST-78]	NA
PH560_00665-RE	KNE92679.1/6.0e-44/hypothetical protein PSTG_13892 [Puccinia striiformis f. sp. tritici PST-78]	NA
PH560_00665-RF	KNE89123.1/1.1e-35/hypothetical protein PSTG_17420 [Puccinia striiformis f. sp. tritici PST-78]	NA
PH560_00665-RA	KNZ48623.1/6.0e-20/uncharacterized protein VP01_552g2 [Puccinia sorghi]	NA
PH560_00665-RD	KNE92679.1/3.6e-13/hypothetical protein PSTG_13892 [Puccinia striiformis f. sp. tritici PST-78]	NA
PH560_00665-RG	KNZ47910.1/2.3e-10/uncharacterized protein VP01_604g2 [Puccinia sorghi]	NA
PH560_00662-RA	KNE88595.1/3.2e-69/hypothetical protein PSTG_17987 [Puccinia striiformis f. sp. tritici PST-78]	NA
PH560_00670-RA	NA	NA
PH560_00666-RA	NA	NA
PH560_00660-RA	XP_003329560.2/2.5e-15/hypothetical protein PGTG_11310 [Puccinia graminis f. sp. tritici CRL 75-36-700-3]	NA
PH560_00663-RA	XP_003319752.2/3.5e-10/hypothetical protein PGTG_01926 [Puccinia graminis f. sp. tritici CRL 75-36-700-3]	NA
PH560_00676-RC	OAV95418.1/0.0e+00/hypothetical protein PTTG_05465 [Puccinia triticina 1-1 BBBD Race 1]	sp|P47104|RAV1_YEAST/2.8e-18/Regulator of V-ATPase in vacuolar membrane protein 1 OS=Saccharomyces cerevisiae (strain ATCC 204508 / S288c) GN=RAV1 PE=1 SV=1
PH560_00676-RB	KNZ54924.1/0.0e+00/hypothetical protein VP01_2815g2 [Puccinia sorghi]	sp|P47104|RAV1_YEAST/2.4e-18/Regulator of V-ATPase in vacuolar membrane protein 1 OS=Saccharomyces cerevisiae (strain ATCC 204508 / S288c) GN=RAV1 PE=1 SV=1
PH560_00676-RA	OAV95418.1/6.5e-71/hypothetical protein PTTG_05465 [Puccinia triticina 1-1 BBBD Race 1]	sp|Q9Y817|RAV1_SCHPO/1.3e-31/Regulator of V-ATPase in vacuolar membrane protein 1 OS=Schizosaccharomyces pombe (strain 972 / ATCC 24843) GN=rav1 PE=1 SV=1
PH560_00673-RA	OAV95412.1/1.3e-274/hypothetical protein PTTG_05459 [Puccinia triticina 1-1 BBBD Race 1]	sp|Q6CEI9|HSV2_YARLI/3.5e-35/SVP1-like protein 2 OS=Yarrowia lipolytica (strain CLIB 122 / E 150) GN=HSV2 PE=3 SV=1
PH560_00673-RB	OAV95412.1/2.2e-207/hypothetical protein PTTG_05459 [Puccinia triticina 1-1 BBBD Race 1]	sp|Q6CEI9|HSV2_YARLI/1.6e-32/SVP1-like protein 2 OS=Yarrowia lipolytica (strain CLIB 122 / E 150) GN=HSV2 PE=3 SV=1
PH560_00678-RA	OAV86989.1/1.3e-225/GTP-binding protein YchF [Puccinia triticina 1-1 BBBD Race 1]	sp|O13998|OLA1_SCHPO/1.4e-139/Obg-like ATPase 1 OS=Schizosaccharomyces pombe (strain 972 / ATCC 24843) GN=SPAC27E2.03c PE=1 SV=1
PH560_00675-RA	OAV95417.1/3.4e-99/hypothetical protein PTTG_05464 [Puccinia triticina 1-1 BBBD Race 1]	NA
PH560_00675-RB	NA	NA
PH560_00672-RB	OAV95413.1/2.2e-104/GTP-binding protein ypt1 [Puccinia triticina 1-1 BBBD Race 1]	sp|P11620|YPT1_SCHPO/2.9e-85/GTP-binding protein ypt1 OS=Schizosaccharomyces pombe (strain 972 / ATCC 24843) GN=ypt1 PE=1 SV=2
PH560_00672-RA	OAV95413.1/1.7e-86/GTP-binding protein ypt1 [Puccinia triticina 1-1 BBBD Race 1]	sp|P11620|YPT1_SCHPO/6.0e-68/GTP-binding protein ypt1 OS=Schizosaccharomyces pombe (strain 972 / ATCC 24843) GN=ypt1 PE=1 SV=2
PH560_00671-RA	OAV90081.1/2.5e-94/hypothetical protein PTTG_03299 [Puccinia triticina 1-1 BBBD Race 1]	sp|Q8TFH1|RL18B_SCHPO/4.3e-67/60S ribosomal protein L18-B OS=Schizosaccharomyces pombe (strain 972 / ATCC 24843) GN=rpl1802 PE=1 SV=1
PH560_00674-RA	KNZ62882.1/6.7e-10/uncharacterized protein VP01_1211g4 [Puccinia sorghi]	NA
PH560_00677-RA	NA	NA
PH560_00691-RA	OAV92967.1/0.0e+00/hypothetical protein PTTG_02688 [Puccinia triticina 1-1 BBBD Race 1]	sp|P0CQ67|RAD5_CRYNB/3.6e-131/DNA repair protein RAD5 OS=Cryptococcus neoformans var. neoformans serotype D (strain B-3501A) GN=RAD5 PE=3 SV=1
PH560_00692-RB	XP_003330438.2/0.0e+00/hypothetical protein PGTG_11975 [Puccinia graminis f. sp. tritici CRL 75-36-700-3]	sp|P38093|FLBA_EMENI/3.1e-54/Developmental regulator flbA OS=Emericella nidulans (strain FGSC A4 / ATCC 38163 / CBS 112.46 / NRRL 194 / M139) GN=flbA PE=2 SV=1
PH560_00692-RA	XP_003330438.2/1.6e-304/hypothetical protein PGTG_11975 [Puccinia graminis f. sp. tritici CRL 75-36-700-3]	sp|P38093|FLBA_EMENI/2.1e-54/Developmental regulator flbA OS=Emericella nidulans (strain FGSC A4 / ATCC 38163 / CBS 112.46 / NRRL 194 / M139) GN=flbA PE=2 SV=1
PH560_00692-RC	XP_003330438.2/7.2e-289/hypothetical protein PGTG_11975 [Puccinia graminis f. sp. tritici CRL 75-36-700-3]	sp|P38093|FLBA_EMENI/1.8e-50/Developmental regulator flbA OS=Emericella nidulans (strain FGSC A4 / ATCC 38163 / CBS 112.46 / NRRL 194 / M139) GN=flbA PE=2 SV=1
PH560_00681-RB	OAV89324.1/1.3e-264/hypothetical protein PTTG_07422 [Puccinia triticina 1-1 BBBD Race 1]	sp|Q9US10|YK68_SCHPO/4.4e-28/Uncharacterized membrane protein C6F6.13c OS=Schizosaccharomyces pombe (strain 972 / ATCC 24843) GN=SPAC607.08c PE=3 SV=1
PH560_00681-RA	OAV89324.1/1.2e-303/hypothetical protein PTTG_07422 [Puccinia triticina 1-1 BBBD Race 1]	sp|Q9US10|YK68_SCHPO/3.7e-31/Uncharacterized membrane protein C6F6.13c OS=Schizosaccharomyces pombe (strain 972 / ATCC 24843) GN=SPAC607.08c PE=3 SV=1
PH560_00688-RE	OAV91946.1/8.8e-143/hypothetical protein PTTG_27813 [Puccinia triticina 1-1 BBBD Race 1]	NA
PH560_00688-RJ	KNZ57825.1/1.3e-164/hypothetical protein VP01_2063g8 [Puccinia sorghi]	NA
PH560_00688-RI	XP_003307527.1/4.0e-133/hypothetical protein PGTG_00477 [Puccinia graminis f. sp. tritici CRL 75-36-700-3]	NA
PH560_00688-RD	KNZ57825.1/3.6e-193/hypothetical protein VP01_2063g8 [Puccinia sorghi]	NA
PH560_00688-RH	KNZ57825.1/1.5e-181/hypothetical protein VP01_2063g8 [Puccinia sorghi]	NA
PH560_00688-RB	KNZ44459.1/2.9e-115/hypothetical protein VP01_914g2 [Puccinia sorghi]	NA
PH560_00688-RC	KNZ44459.1/6.6e-48/hypothetical protein VP01_914g2 [Puccinia sorghi]	NA
PH560_00688-RK	XP_003335553.1/4.1e-159/hypothetical protein PGTG_16879 [Puccinia graminis f. sp. tritici CRL 75-36-700-3]	NA
PH560_00688-RL	XP_003335553.1/1.8e-151/hypothetical protein PGTG_16879 [Puccinia graminis f. sp. tritici CRL 75-36-700-3]	NA
PH560_00688-RA	KNZ44459.1/1.2e-116/hypothetical protein VP01_914g2 [Puccinia sorghi]	NA
PH560_00688-RM	XP_003335553.1/1.2e-130/hypothetical protein PGTG_16879 [Puccinia graminis f. sp. tritici CRL 75-36-700-3]	NA
PH560_00688-RN	XP_003335553.1/1.1e-105/hypothetical protein PGTG_16879 [Puccinia graminis f. sp. tritici CRL 75-36-700-3]	NA
PH560_00688-RF	KNZ44459.1/2.6e-100/hypothetical protein VP01_914g2 [Puccinia sorghi]	NA
PH560_00688-RG	KNZ44459.1/2.8e-88/hypothetical protein VP01_914g2 [Puccinia sorghi]	NA
PH560_00688-RO	XP_003335553.1/3.5e-84/hypothetical protein PGTG_16879 [Puccinia graminis f. sp. tritici CRL 75-36-700-3]	NA
PH560_00687-RA	XP_003888756.1/1.6e-103/hypothetical protein PGTG_22484 [Puccinia graminis f. sp. tritici CRL 75-36-700-3]	NA
PH560_00679-RA	OAV89321.1/1.6e-216/hypothetical protein PTTG_10079 [Puccinia triticina 1-1 BBBD Race 1]	sp|O94601|YC8E_SCHPO/2.3e-42/Uncharacterized protein C622.14 OS=Schizosaccharomyces pombe (strain 972 / ATCC 24843) GN=SPCC622.14 PE=4 SV=2
PH560_00679-RB	OAV89321.1/9.2e-220/hypothetical protein PTTG_10079 [Puccinia triticina 1-1 BBBD Race 1]	sp|O94601|YC8E_SCHPO/2.3e-42/Uncharacterized protein C622.14 OS=Schizosaccharomyces pombe (strain 972 / ATCC 24843) GN=SPCC622.14 PE=4 SV=2
PH560_00679-RC	OAV89321.1/9.8e-130/hypothetical protein PTTG_10079 [Puccinia triticina 1-1 BBBD Race 1]	sp|O94601|YC8E_SCHPO/1.2e-12/Uncharacterized protein C622.14 OS=Schizosaccharomyces pombe (strain 972 / ATCC 24843) GN=SPCC622.14 PE=4 SV=2
PH560_00690-RA	XP_003322986.2/3.6e-89/hypothetical protein PGTG_04523 [Puccinia graminis f. sp. tritici CRL 75-36-700-3]	NA
PH560_00690-RC	XP_003322986.2/2.8e-65/hypothetical protein PGTG_04523 [Puccinia graminis f. sp. tritici CRL 75-36-700-3]	NA
PH560_00690-RB	OAV86507.1/8.1e-50/hypothetical protein PTTG_03569 [Puccinia triticina 1-1 BBBD Race 1]	NA
PH560_00682-RA	OAV89325.1/9.0e-153/hypothetical protein PTTG_07421 [Puccinia triticina 1-1 BBBD Race 1]	sp|O42901|YBA9_SCHPO/5.7e-43/Uncharacterized protein C119.09c OS=Schizosaccharomyces pombe (strain 972 / ATCC 24843) GN=SPBC119.09c PE=2 SV=3
PH560_00680-RC	OAV89323.1/5.5e-99/hypothetical protein PTTG_12466 [Puccinia triticina 1-1 BBBD Race 1]	NA
PH560_00680-RB	OAV89323.1/6.3e-92/hypothetical protein PTTG_12466 [Puccinia triticina 1-1 BBBD Race 1]	NA
PH560_00680-RA	OAV89323.1/1.1e-96/hypothetical protein PTTG_12466 [Puccinia triticina 1-1 BBBD Race 1]	NA
PH560_00680-RD	OAV89323.1/6.8e-69/hypothetical protein PTTG_12466 [Puccinia triticina 1-1 BBBD Race 1]	NA
PH560_00689-RA	XP_003330750.2/3.6e-114/hypothetical protein PGTG_12287 [Puccinia graminis f. sp. tritici CRL 75-36-700-3]	NA
PH560_00689-RB	KNE95513.1/1.1e-56/hypothetical protein PSTG_11119 [Puccinia striiformis f. sp. tritici PST-78]	NA
PH560_00689-RF	KNZ44460.1/5.0e-97/hypothetical protein VP01_914g3 [Puccinia sorghi]	NA
PH560_00689-RC	XP_003330750.2/7.3e-84/hypothetical protein PGTG_12287 [Puccinia graminis f. sp. tritici CRL 75-36-700-3]	NA
PH560_00689-RE	KNZ44460.1/2.0e-71/hypothetical protein VP01_914g3 [Puccinia sorghi]	NA
PH560_00689-RD	KNZ44460.1/4.2e-24/hypothetical protein VP01_914g3 [Puccinia sorghi]	NA
PH560_00684-RA	XP_003319600.2/9.9e-49/NAK protein kinase [Puccinia graminis f. sp. tritici CRL 75-36-700-3]	NA
PH560_00685-RC	KNE91264.1/7.0e-39/hypothetical protein PSTG_15329 [Puccinia striiformis f. sp. tritici PST-78]	NA
PH560_00685-RB	KNE91264.1/1.2e-30/hypothetical protein PSTG_15329 [Puccinia striiformis f. sp. tritici PST-78]	NA
PH560_00685-RA	KNE91264.1/1.7e-22/hypothetical protein PSTG_15329 [Puccinia striiformis f. sp. tritici PST-78]	NA
PH560_00686-RB	OAV85815.1/4.5e-50/hypothetical protein PTTG_30249 [Puccinia triticina 1-1 BBBD Race 1]	NA
PH560_00686-RA	OAV85815.1/2.6e-62/hypothetical protein PTTG_30249 [Puccinia triticina 1-1 BBBD Race 1]	NA
PH560_00686-RC	OAV85815.1/4.8e-55/hypothetical protein PTTG_30249 [Puccinia triticina 1-1 BBBD Race 1]	NA
PH560_00694-RA	OAV92962.1/5.3e-40/hypothetical protein PTTG_27491 [Puccinia triticina 1-1 BBBD Race 1]	NA
PH560_00693-RA	KNE93638.1/1.1e-17/hypothetical protein PSTG_13014 [Puccinia striiformis f. sp. tritici PST-78]	NA
PH560_00683-RA	OAV97728.1/2.2e-34/NAK protein kinase [Puccinia triticina 1-1 BBBD Race 1]	sp|Q9USS2|PPK29_SCHPO/1.2e-19/Serine/threonine-protein kinase ppk29 OS=Schizosaccharomyces pombe (strain 972 / ATCC 24843) GN=ppk29 PE=1 SV=1
PH560_00703-RA	XP_016269199.1/1.8e-240/retrotransposon polyprotein [Rhodotorula toruloides NP11]	sp|Q99315|YG31B_YEAST/8.2e-113/Transposon Ty3-G Gag-Pol polyprotein OS=Saccharomyces cerevisiae (strain ATCC 204508 / S288c) GN=TY3B-G PE=1 SV=3
PH560_00703-RB	NA	NA
PH560_00697-RA	KNZ60485.1/9.0e-128/uncharacterized protein VP01_1548g4 [Puccinia sorghi]	NA
PH560_00697-RB	KNZ60485.1/1.0e-93/uncharacterized protein VP01_1548g4 [Puccinia sorghi]	NA
PH560_00700-RA	KNE89403.1/2.2e-67/hypothetical protein PSTG_17144 [Puccinia striiformis f. sp. tritici PST-78]	NA
PH560_00700-RB	KNE89403.1/5.1e-24/hypothetical protein PSTG_17144 [Puccinia striiformis f. sp. tritici PST-78]	NA
PH560_00704-RA	KNE91264.1/6.3e-58/hypothetical protein PSTG_15329 [Puccinia striiformis f. sp. tritici PST-78]	NA
PH560_00704-RB	KNE91264.1/1.2e-30/hypothetical protein PSTG_15329 [Puccinia striiformis f. sp. tritici PST-78]	NA
PH560_00704-RC	KNE91264.1/2.3e-22/hypothetical protein PSTG_15329 [Puccinia striiformis f. sp. tritici PST-78]	NA
PH560_00695-RB	KNZ49864.1/3.8e-65/hypothetical protein VP01_4738g1 [Puccinia sorghi]	sp|P0C2J1|YP14B_YEAST/4.9e-09/Transposon Ty1-PR3 Gag-Pol polyprotein OS=Saccharomyces cerevisiae (strain ATCC 204508 / S288c) GN=TY1B-PR3 PE=1 SV=1
PH560_00695-RA	KNZ49864.1/5.6e-45/hypothetical protein VP01_4738g1 [Puccinia sorghi]	sp|P0C2J1|YP14B_YEAST/4.1e-08/Transposon Ty1-PR3 Gag-Pol polyprotein OS=Saccharomyces cerevisiae (strain ATCC 204508 / S288c) GN=TY1B-PR3 PE=1 SV=1
PH560_00701-RB	KNF06786.1/4.4e-37/hypothetical protein PSTG_00101 [Puccinia striiformis f. sp. tritici PST-78]	NA
PH560_00701-RA	KNZ64683.1/9.5e-30/uncharacterized protein VP01_1004g11 [Puccinia sorghi]	NA
PH560_00699-RA	KNF04061.1/7.9e-28/hypothetical protein PSTG_02768 [Puccinia striiformis f. sp. tritici PST-78]	NA
PH560_00696-RA	KNZ47593.1/2.8e-22/uncharacterized protein VP01_629g8 [Puccinia sorghi]	NA
PH560_00698-RA	NA	NA
PH560_00712-RA	OAV90692.1/1.6e-114/hypothetical protein PTTG_06551 [Puccinia triticina 1-1 BBBD Race 1]	NA
PH560_00717-RA	OAV85815.1/7.9e-113/hypothetical protein PTTG_30249 [Puccinia triticina 1-1 BBBD Race 1]	NA
PH560_00717-RB	OAV85815.1/2.0e-125/hypothetical protein PTTG_30249 [Puccinia triticina 1-1 BBBD Race 1]	NA
PH560_00705-RA	OAV96968.1/6.6e-27/hypothetical protein PTTG_08836 [Puccinia triticina 1-1 BBBD Race 1]	NA
PH560_00711-RA	XP_003328449.2/5.2e-71/hypothetical protein PGTG_09743 [Puccinia graminis f. sp. tritici CRL 75-36-700-3]	NA
PH560_00711-RB	XP_003328449.2/2.3e-59/hypothetical protein PGTG_09743 [Puccinia graminis f. sp. tritici CRL 75-36-700-3]	NA
PH560_00715-RA	KNE89403.1/3.1e-60/hypothetical protein PSTG_17144 [Puccinia striiformis f. sp. tritici PST-78]	NA
PH560_00708-RA	OAV85630.1/8.9e-26/hypothetical protein PTTG_30381 [Puccinia triticina 1-1 BBBD Race 1]	NA
PH560_00708-RB	OAV85630.1/8.7e-26/hypothetical protein PTTG_30381 [Puccinia triticina 1-1 BBBD Race 1]	NA
PH560_00708-RD	OAV85630.1/7.6e-26/hypothetical protein PTTG_30381 [Puccinia triticina 1-1 BBBD Race 1]	NA
PH560_00708-RC	NA	NA
PH560_00709-RA	OAV94620.1/8.7e-36/hypothetical protein PTTG_07726 [Puccinia triticina 1-1 BBBD Race 1]	NA
PH560_00710-RB	OAV90689.1/1.6e-43/hypothetical protein PTTG_06550 [Puccinia triticina 1-1 BBBD Race 1]	NA
PH560_00710-RA	NA	NA
PH560_00706-RA	KNZ51673.1/1.8e-22/uncharacterized protein VP01_386g17 [Puccinia sorghi]	NA
PH560_00714-RA	KNE88828.1/6.5e-26/hypothetical protein PSTG_17734 [Puccinia striiformis f. sp. tritici PST-78]	NA
PH560_00713-RA	NA	NA
PH560_00707-RA	XP_003326405.2/1.2e-14/hypothetical protein PGTG_08235 [Puccinia graminis f. sp. tritici CRL 75-36-700-3]	NA
PH560_00716-RA	NA	NA
PH560_00721-RB	XP_003330448.2/3.2e-210/hypothetical protein PGTG_11985 [Puccinia graminis f. sp. tritici CRL 75-36-700-3]	NA
PH560_00721-RA	XP_003330448.2/3.7e-203/hypothetical protein PGTG_11985 [Puccinia graminis f. sp. tritici CRL 75-36-700-3]	sp|P09032|EI2BG_YEAST/3.7e-06/Translation initiation factor eIF-2B subunit gamma OS=Saccharomyces cerevisiae (strain ATCC 204508 / S288c) GN=GCD1 PE=1 SV=3
PH560_00723-RF	XP_003330834.1/1.3e-121/hypothetical protein PGTG_12371 [Puccinia graminis f. sp. tritici CRL 75-36-700-3]	NA
PH560_00723-RD	XP_003330834.1/1.3e-113/hypothetical protein PGTG_12371 [Puccinia graminis f. sp. tritici CRL 75-36-700-3]	NA
PH560_00723-RE	XP_003330834.1/3.7e-110/hypothetical protein PGTG_12371 [Puccinia graminis f. sp. tritici CRL 75-36-700-3]	NA
PH560_00723-RC	XP_003330834.1/2.0e-114/hypothetical protein PGTG_12371 [Puccinia graminis f. sp. tritici CRL 75-36-700-3]	NA
PH560_00723-RB	XP_003330834.1/2.6e-106/hypothetical protein PGTG_12371 [Puccinia graminis f. sp. tritici CRL 75-36-700-3]	NA
PH560_00723-RA	XP_003330834.1/2.7e-28/hypothetical protein PGTG_12371 [Puccinia graminis f. sp. tritici CRL 75-36-700-3]	NA
PH560_00722-RE	KNE89246.1/3.8e-138/hypothetical protein PSTG_17295 [Puccinia striiformis f. sp. tritici PST-78]	NA
PH560_00722-RB	KNE89246.1/2.3e-191/hypothetical protein PSTG_17295 [Puccinia striiformis f. sp. tritici PST-78]	NA
PH560_00722-RD	KNE89246.1/6.8e-168/hypothetical protein PSTG_17295 [Puccinia striiformis f. sp. tritici PST-78]	NA
PH560_00722-RG	KNE89246.1/3.0e-157/hypothetical protein PSTG_17295 [Puccinia striiformis f. sp. tritici PST-78]	NA
PH560_00722-RH	KNE89246.1/3.7e-152/hypothetical protein PSTG_17295 [Puccinia striiformis f. sp. tritici PST-78]	NA
PH560_00722-RC	KNE89246.1/4.1e-110/hypothetical protein PSTG_17295 [Puccinia striiformis f. sp. tritici PST-78]	NA
PH560_00722-RF	KNE89246.1/1.8e-99/hypothetical protein PSTG_17295 [Puccinia striiformis f. sp. tritici PST-78]	NA
PH560_00722-RI	KNE89246.1/3.8e-88/hypothetical protein PSTG_17295 [Puccinia striiformis f. sp. tritici PST-78]	NA
PH560_00722-RA	KNE99175.1/3.8e-53/hypothetical protein PSTG_07486 [Puccinia striiformis f. sp. tritici PST-78]	NA
PH560_00719-RA	KNE89254.1/6.3e-53/hypothetical protein PSTG_17287, partial [Puccinia striiformis f. sp. tritici PST-78]	NA
PH560_00719-RB	NA	NA
PH560_00720-RA	OAV85547.1/1.9e-47/hypothetical protein PTTG_30442, partial [Puccinia triticina 1-1 BBBD Race 1]	NA
PH560_00718-RA	KNE99411.1/6.4e-34/hypothetical protein PSTG_07341 [Puccinia striiformis f. sp. tritici PST-78]	NA
PH560_00746-RA	XP_003337506.2/9.5e-117/hypothetical protein PGTG_19367 [Puccinia graminis f. sp. tritici CRL 75-36-700-3]	sp|Q12193|YB12B_YEAST/2.9e-22/Transposon Ty1-BR Gag-Pol polyprotein OS=Saccharomyces cerevisiae (strain ATCC 204508 / S288c) GN=TY1B-BR PE=3 SV=1
PH560_00746-RB	KNE88689.1/6.0e-130/hypothetical protein PSTG_17894, partial [Puccinia striiformis f. sp. tritici PST-78]	sp|Q03494|YD22B_YEAST/3.7e-20/Transposon Ty2-DR2 Gag-Pol polyprotein OS=Saccharomyces cerevisiae (strain ATCC 204508 / S288c) GN=TY2B-DR2 PE=3 SV=2
PH560_00746-RC	KNE88689.1/4.3e-114/hypothetical protein PSTG_17894, partial [Puccinia striiformis f. sp. tritici PST-78]	sp|Q03494|YD22B_YEAST/3.5e-20/Transposon Ty2-DR2 Gag-Pol polyprotein OS=Saccharomyces cerevisiae (strain ATCC 204508 / S288c) GN=TY2B-DR2 PE=3 SV=2
PH560_00746-RD	KNZ59814.1/1.4e-109/uncharacterized protein VP01_1659g5 [Puccinia sorghi]	sp|Q03494|YD22B_YEAST/3.4e-20/Transposon Ty2-DR2 Gag-Pol polyprotein OS=Saccharomyces cerevisiae (strain ATCC 204508 / S288c) GN=TY2B-DR2 PE=3 SV=2
PH560_00725-RB	XP_003330452.1/0.0e+00/minichromosome maintenance protein 4 (cell division control protein 54) [Puccinia graminis f. sp. tritici CRL 75-36-700-3]	sp|P29458|MCM4_SCHPO/1.5e-251/DNA replication licensing factor mcm4 OS=Schizosaccharomyces pombe (strain 972 / ATCC 24843) GN=mcm4 PE=1 SV=2
PH560_00725-RA	XP_003330452.1/0.0e+00/minichromosome maintenance protein 4 (cell division control protein 54) [Puccinia graminis f. sp. tritici CRL 75-36-700-3]	sp|P29458|MCM4_SCHPO/3.8e-134/DNA replication licensing factor mcm4 OS=Schizosaccharomyces pombe (strain 972 / ATCC 24843) GN=mcm4 PE=1 SV=2
PH560_00725-RC	OAV99561.1/7.7e-31/hypothetical protein PTTG_25211 [Puccinia triticina 1-1 BBBD Race 1]	NA
PH560_00725-RD	KNE97875.1/3.4e-50/hypothetical protein PSTG_08898 [Puccinia striiformis f. sp. tritici PST-78]	sp|P29458|MCM4_SCHPO/1.5e-39/DNA replication licensing factor mcm4 OS=Schizosaccharomyces pombe (strain 972 / ATCC 24843) GN=mcm4 PE=1 SV=2
PH560_00739-RH	KNF05443.1/0.0e+00/hypothetical protein PSTG_01252 [Puccinia striiformis f. sp. tritici PST-78]	NA
PH560_00739-RD	KNF05443.1/1.9e-157/hypothetical protein PSTG_01252 [Puccinia striiformis f. sp. tritici PST-78]	NA
PH560_00739-RB	KNF05443.1/5.8e-129/hypothetical protein PSTG_01252 [Puccinia striiformis f. sp. tritici PST-78]	NA
PH560_00739-RJ	KNF05443.1/0.0e+00/hypothetical protein PSTG_01252 [Puccinia striiformis f. sp. tritici PST-78]	NA
PH560_00739-RG	KNF05443.1/1.5e-291/hypothetical protein PSTG_01252 [Puccinia striiformis f. sp. tritici PST-78]	NA
PH560_00739-RE	KNF05443.1/1.6e-210/hypothetical protein PSTG_01252 [Puccinia striiformis f. sp. tritici PST-78]	NA
PH560_00739-RC	KNF05443.1/7.1e-141/hypothetical protein PSTG_01252 [Puccinia striiformis f. sp. tritici PST-78]	NA
PH560_00739-RI	KNF05443.1/0.0e+00/hypothetical protein PSTG_01252 [Puccinia striiformis f. sp. tritici PST-78]	NA
PH560_00739-RF	OAV90332.1/1.8e-295/hypothetical protein PTTG_07335 [Puccinia triticina 1-1 BBBD Race 1]	NA
PH560_00739-RA	OAV90332.1/1.1e-47/hypothetical protein PTTG_07335 [Puccinia triticina 1-1 BBBD Race 1]	NA
PH560_00739-RL	NA	NA
PH560_00739-RK	NA	NA
PH560_00726-RB	OAV92958.1/0.0e+00/hypothetical protein PTTG_02691 [Puccinia triticina 1-1 BBBD Race 1]	sp|P31382|PMT2_YEAST/6.9e-183/Dolichyl-phosphate-mannose--protein mannosyltransferase 2 OS=Saccharomyces cerevisiae (strain ATCC 204508 / S288c) GN=PMT2 PE=1 SV=2
PH560_00726-RC	OAV92958.1/0.0e+00/hypothetical protein PTTG_02691 [Puccinia triticina 1-1 BBBD Race 1]	sp|P31382|PMT2_YEAST/4.0e-183/Dolichyl-phosphate-mannose--protein mannosyltransferase 2 OS=Saccharomyces cerevisiae (strain ATCC 204508 / S288c) GN=PMT2 PE=1 SV=2
PH560_00726-RA	OAV92959.1/3.3e-291/hypothetical protein, variant [Puccinia triticina 1-1 BBBD Race 1]	sp|P47190|PMT3_YEAST/9.3e-134/Dolichyl-phosphate-mannose--protein mannosyltransferase 3 OS=Saccharomyces cerevisiae (strain ATCC 204508 / S288c) GN=PMT3 PE=1 SV=2
PH560_00726-RE	OAV92958.1/1.4e-288/hypothetical protein PTTG_02691 [Puccinia triticina 1-1 BBBD Race 1]	sp|P31382|PMT2_YEAST/2.9e-121/Dolichyl-phosphate-mannose--protein mannosyltransferase 2 OS=Saccharomyces cerevisiae (strain ATCC 204508 / S288c) GN=PMT2 PE=1 SV=2
PH560_00726-RD	OAV92958.1/5.5e-33/hypothetical protein PTTG_02691 [Puccinia triticina 1-1 BBBD Race 1]	sp|Q5ADM9|PMT2_CANAL/1.2e-13/Dolichyl-phosphate-mannose--protein mannosyltransferase 2 OS=Candida albicans (strain SC5314 / ATCC MYA-2876) GN=PMT2 PE=1 SV=1
PH560_00747-RI	KNF05443.1/9.8e-294/hypothetical protein PSTG_01252 [Puccinia striiformis f. sp. tritici PST-78]	NA
PH560_00747-RC	KNF05443.1/2.8e-116/hypothetical protein PSTG_01252 [Puccinia striiformis f. sp. tritici PST-78]	NA
PH560_00747-RA	KNF05443.1/6.2e-88/hypothetical protein PSTG_01252 [Puccinia striiformis f. sp. tritici PST-78]	NA
PH560_00747-RG	KNF05443.1/1.4e-290/hypothetical protein PSTG_01252 [Puccinia striiformis f. sp. tritici PST-78]	NA
PH560_00747-RE	KNF05443.1/1.2e-249/hypothetical protein PSTG_01252 [Puccinia striiformis f. sp. tritici PST-78]	NA
PH560_00747-RD	KNF05443.1/3.3e-169/hypothetical protein PSTG_01252 [Puccinia striiformis f. sp. tritici PST-78]	NA
PH560_00747-RB	KNF05443.1/7.6e-100/hypothetical protein PSTG_01252 [Puccinia striiformis f. sp. tritici PST-78]	NA
PH560_00747-RH	KNF05443.1/7.2e-287/hypothetical protein PSTG_01252 [Puccinia striiformis f. sp. tritici PST-78]	NA
PH560_00747-RF	KNF05443.1/1.3e-249/hypothetical protein PSTG_01252 [Puccinia striiformis f. sp. tritici PST-78]	NA
PH560_00747-RK	NA	NA
PH560_00747-RJ	NA	NA
PH560_00738-RB	OAV92947.1/2.8e-277/hypothetical protein PTTG_02699 [Puccinia triticina 1-1 BBBD Race 1]	sp|S0EEY7|FUS6_GIBF5/5.0e-61/Efflux pump FUS6 OS=Gibberella fujikuroi (strain CBS 195.34 / IMI 58289 / NRRL A-6831) GN=FUS6 PE=2 SV=1
PH560_00738-RA	OAV92947.1/2.8e-271/hypothetical protein PTTG_02699 [Puccinia triticina 1-1 BBBD Race 1]	sp|S0EEY7|FUS6_GIBF5/6.1e-61/Efflux pump FUS6 OS=Gibberella fujikuroi (strain CBS 195.34 / IMI 58289 / NRRL A-6831) GN=FUS6 PE=2 SV=1
PH560_00741-RB	KNZ47082.1/1.4e-224/hypothetical protein VP01_66g14 [Puccinia sorghi]	sp|Q07163|TY1AB_YEASX/5.8e-18/Transposon TyH3 Gag-Pol polyprotein OS=Saccharomyces cerevisiae GN=TY1B PE=1 SV=2
PH560_00741-RD	KNZ63808.1/1.3e-270/hypothetical protein VP01_109g7 [Puccinia sorghi]	sp|P0C2J7|YH41B_YEAST/2.5e-27/Transposon Ty4-H Gag-Pol polyprotein OS=Saccharomyces cerevisiae (strain ATCC 204508 / S288c) GN=TY4B-H PE=1 SV=1
PH560_00741-RC	KNZ60563.1/2.0e-263/hypothetical protein VP01_1536g6 [Puccinia sorghi]	sp|P0C2J7|YH41B_YEAST/2.4e-27/Transposon Ty4-H Gag-Pol polyprotein OS=Saccharomyces cerevisiae (strain ATCC 204508 / S288c) GN=TY4B-H PE=1 SV=1
PH560_00741-RA	KNZ49317.1/2.0e-49/hypothetical protein VP01_508g2 [Puccinia sorghi]	NA
PH560_00734-RA	OAV92952.1/3.0e-183/hypothetical protein PTTG_02695 [Puccinia triticina 1-1 BBBD Race 1]	NA
PH560_00728-RA	OAV88307.1/9.1e-202/hypothetical protein PTTG_05267 [Puccinia triticina 1-1 BBBD Race 1]	sp|O74184|WAT1_SCHPO/9.7e-100/Target of rapamycin complex subunit wat1 OS=Schizosaccharomyces pombe (strain 972 / ATCC 24843) GN=pop3 PE=1 SV=1
PH560_00724-RB	OAV89315.1/3.1e-115/hypothetical protein PTTG_01411 [Puccinia triticina 1-1 BBBD Race 1]	NA
PH560_00724-RA	OAV89315.1/1.0e-111/hypothetical protein PTTG_01411 [Puccinia triticina 1-1 BBBD Race 1]	NA
PH560_00736-RA	OAV92950.1/1.9e-27/hypothetical protein PTTG_02697, partial [Puccinia triticina 1-1 BBBD Race 1]	NA
PH560_00735-RA	OAV92951.1/1.0e-87/hypothetical protein PTTG_02696 [Puccinia triticina 1-1 BBBD Race 1]	sp|Q4P341|NACA_USTMA/6.4e-31/Nascent polypeptide-associated complex subunit alpha OS=Ustilago maydis (strain 521 / FGSC 9021) GN=EGD2 PE=3 SV=1
PH560_00742-RA	KNZ47082.1/2.0e-60/hypothetical protein VP01_66g14 [Puccinia sorghi]	sp|P47024|YJ41B_YEAST/1.0e-08/Transposon Ty4-J Gag-Pol polyprotein OS=Saccharomyces cerevisiae (strain ATCC 204508 / S288c) GN=TY4B-J PE=3 SV=3
PH560_00733-RA	XP_003328482.2/1.9e-08/hypothetical protein PGTG_09776 [Puccinia graminis f. sp. tritici CRL 75-36-700-3]	NA
PH560_00733-RB	OAV87190.1/3.1e-32/hypothetical protein PTTG_29532, partial [Puccinia triticina 1-1 BBBD Race 1]	NA
PH560_00733-RC	OAV87190.1/2.3e-32/hypothetical protein PTTG_29532, partial [Puccinia triticina 1-1 BBBD Race 1]	NA
PH560_00733-RD	OAV87190.1/3.3e-30/hypothetical protein PTTG_29532, partial [Puccinia triticina 1-1 BBBD Race 1]	NA
PH560_00733-RE	NA	NA
PH560_00733-RF	KNF04883.1/1.2e-16/hypothetical protein PSTG_01940 [Puccinia striiformis f. sp. tritici PST-78]	NA
PH560_00740-RA	KNZ45271.1/1.7e-17/hypothetical protein VP01_830g3, partial [Puccinia sorghi]	NA
PH560_00740-RB	KNZ45271.1/7.1e-12/hypothetical protein VP01_830g3, partial [Puccinia sorghi]	NA
PH560_00730-RB	KNF05542.1/2.0e-10/hypothetical protein PSTG_01353 [Puccinia striiformis f. sp. tritici PST-78]	NA
PH560_00730-RA	KNF04997.1/3.0e-06/hypothetical protein PSTG_02053 [Puccinia striiformis f. sp. tritici PST-78]	NA
PH560_00729-RB	OAV87190.1/4.1e-37/hypothetical protein PTTG_29532, partial [Puccinia triticina 1-1 BBBD Race 1]	NA
PH560_00729-RD	OAV87190.1/2.0e-36/hypothetical protein PTTG_29532, partial [Puccinia triticina 1-1 BBBD Race 1]	NA
PH560_00729-RC	OAV87190.1/5.5e-39/hypothetical protein PTTG_29532, partial [Puccinia triticina 1-1 BBBD Race 1]	NA
PH560_00729-RA	KNF04883.1/5.3e-17/hypothetical protein PSTG_01940 [Puccinia striiformis f. sp. tritici PST-78]	NA
PH560_00727-RB	OAV92957.1/1.2e-53/hypothetical protein PTTG_02692 [Puccinia triticina 1-1 BBBD Race 1]	NA
PH560_00727-RA	OAV92957.1/7.2e-33/hypothetical protein PTTG_02692 [Puccinia triticina 1-1 BBBD Race 1]	NA
PH560_00731-RA	KNZ46050.1/9.8e-11/uncharacterized protein VP01_7604g2 [Puccinia sorghi]	NA
PH560_00737-RA	OAV92956.1/1.1e-09/hypothetical protein PTTG_02693 [Puccinia triticina 1-1 BBBD Race 1]	NA
PH560_00744-RA	KNE98634.1/6.2e-12/hypothetical protein PSTG_08003, partial [Puccinia striiformis f. sp. tritici PST-78]	NA
PH560_00743-RB	KNZ47593.1/2.2e-16/uncharacterized protein VP01_629g8 [Puccinia sorghi]	NA
PH560_00743-RA	KNZ49865.1/4.0e-14/uncharacterized protein VP01_4738g2 [Puccinia sorghi]	NA
PH560_00732-RA	KNF04997.1/3.0e-06/hypothetical protein PSTG_02053 [Puccinia striiformis f. sp. tritici PST-78]	NA
PH560_00745-RA	NA	NA
PH560_10781-RA	XP_003338497.1/4.0e-60/hypothetical protein PGTG_19981 [Puccinia graminis f. sp. tritici CRL 75-36-700-3]	NA
PH560_10781-RB	XP_003326405.2/6.2e-14/hypothetical protein PGTG_08235 [Puccinia graminis f. sp. tritici CRL 75-36-700-3]	NA
PH560_10782-RA	KNE88595.1/4.2e-74/hypothetical protein PSTG_17987 [Puccinia striiformis f. sp. tritici PST-78]	NA
PH560_10779-RB	XP_003338366.2/1.8e-77/hypothetical protein PGTG_19877 [Puccinia graminis f. sp. tritici CRL 75-36-700-3]	NA
PH560_10779-RA	XP_003338366.2/8.0e-34/hypothetical protein PGTG_19877 [Puccinia graminis f. sp. tritici CRL 75-36-700-3]	NA
PH560_10780-RA	KNE98634.1/3.0e-12/hypothetical protein PSTG_08003, partial [Puccinia striiformis f. sp. tritici PST-78]	NA
PH560_10778-RA	NA	NA
PH560_10790-RD	KNZ57007.1/1.1e-254/hypothetical protein VP01_2264g6 [Puccinia sorghi]	sp|Q99231|YD12B_YEAST/9.6e-27/Transposon Ty1-DR3 Gag-Pol polyprotein OS=Saccharomyces cerevisiae (strain ATCC 204508 / S288c) GN=TY1B-DR3 PE=1 SV=2
PH560_10790-RF	KNZ45049.1/2.8e-274/hypothetical protein VP01_853g8 [Puccinia sorghi]	sp|Q99231|YD12B_YEAST/9.9e-27/Transposon Ty1-DR3 Gag-Pol polyprotein OS=Saccharomyces cerevisiae (strain ATCC 204508 / S288c) GN=TY1B-DR3 PE=1 SV=2
PH560_10790-RE	KNZ45049.1/2.5e-267/hypothetical protein VP01_853g8 [Puccinia sorghi]	sp|Q99231|YD12B_YEAST/9.8e-27/Transposon Ty1-DR3 Gag-Pol polyprotein OS=Saccharomyces cerevisiae (strain ATCC 204508 / S288c) GN=TY1B-DR3 PE=1 SV=2
PH560_10790-RC	KNZ57007.1/1.6e-239/hypothetical protein VP01_2264g6 [Puccinia sorghi]	sp|Q99231|YD12B_YEAST/9.3e-27/Transposon Ty1-DR3 Gag-Pol polyprotein OS=Saccharomyces cerevisiae (strain ATCC 204508 / S288c) GN=TY1B-DR3 PE=1 SV=2
PH560_10790-RB	KNZ59388.1/1.7e-219/hypothetical protein VP01_1742g3 [Puccinia sorghi]	sp|Q99231|YD12B_YEAST/8.5e-27/Transposon Ty1-DR3 Gag-Pol polyprotein OS=Saccharomyces cerevisiae (strain ATCC 204508 / S288c) GN=TY1B-DR3 PE=1 SV=2
PH560_10790-RA	KNZ60938.1/1.3e-135/uncharacterized protein VP01_147g10 [Puccinia sorghi]	sp|Q99231|YD12B_YEAST/4.4e-27/Transposon Ty1-DR3 Gag-Pol polyprotein OS=Saccharomyces cerevisiae (strain ATCC 204508 / S288c) GN=TY1B-DR3 PE=1 SV=2
PH560_10792-RB	KNZ47082.1/5.1e-267/hypothetical protein VP01_66g14 [Puccinia sorghi]	sp|Q07793|YD13B_YEAST/8.3e-20/Transposon Ty1-DR4 Gag-Pol polyprotein OS=Saccharomyces cerevisiae (strain ATCC 204508 / S288c) GN=TY1B-DR4 PE=3 SV=2
PH560_10792-RC	KNZ63808.1/0.0e+00/hypothetical protein VP01_109g7 [Puccinia sorghi]	sp|P47024|YJ41B_YEAST/1.5e-27/Transposon Ty4-J Gag-Pol polyprotein OS=Saccharomyces cerevisiae (strain ATCC 204508 / S288c) GN=TY4B-J PE=3 SV=3
PH560_10792-RF	KNZ63808.1/0.0e+00/hypothetical protein VP01_109g7 [Puccinia sorghi]	sp|P47024|YJ41B_YEAST/1.1e-27/Transposon Ty4-J Gag-Pol polyprotein OS=Saccharomyces cerevisiae (strain ATCC 204508 / S288c) GN=TY4B-J PE=3 SV=3
PH560_10792-RA	KNZ49317.1/2.5e-69/hypothetical protein VP01_508g2 [Puccinia sorghi]	NA
PH560_10792-RD	KNZ63808.1/0.0e+00/hypothetical protein VP01_109g7 [Puccinia sorghi]	sp|P47024|YJ41B_YEAST/1.6e-27/Transposon Ty4-J Gag-Pol polyprotein OS=Saccharomyces cerevisiae (strain ATCC 204508 / S288c) GN=TY4B-J PE=3 SV=3
PH560_10792-RE	KNZ63808.1/0.0e+00/hypothetical protein VP01_109g7 [Puccinia sorghi]	sp|P47024|YJ41B_YEAST/1.4e-27/Transposon Ty4-J Gag-Pol polyprotein OS=Saccharomyces cerevisiae (strain ATCC 204508 / S288c) GN=TY4B-J PE=3 SV=3
PH560_10792-RG	KNZ63808.1/5.0e-300/hypothetical protein VP01_109g7 [Puccinia sorghi]	sp|P47024|YJ41B_YEAST/9.0e-28/Transposon Ty4-J Gag-Pol polyprotein OS=Saccharomyces cerevisiae (strain ATCC 204508 / S288c) GN=TY4B-J PE=3 SV=3
PH560_10792-RH	KNZ61621.1/1.5e-130/hypothetical protein VP01_1377g1 [Puccinia sorghi]	NA
PH560_10783-RI	OAV95141.1/1.7e-215/hypothetical protein PTTG_03855 [Puccinia triticina 1-1 BBBD Race 1]	NA
PH560_10783-RG	OAV95141.1/6.6e-214/hypothetical protein PTTG_03855 [Puccinia triticina 1-1 BBBD Race 1]	NA
PH560_10783-RF	OAV95141.1/1.6e-215/hypothetical protein PTTG_03855 [Puccinia triticina 1-1 BBBD Race 1]	NA
PH560_10783-RH	OAV95141.1/9.9e-207/hypothetical protein PTTG_03855 [Puccinia triticina 1-1 BBBD Race 1]	NA
PH560_10783-RD	OAV95141.1/3.5e-165/hypothetical protein PTTG_03855 [Puccinia triticina 1-1 BBBD Race 1]	NA
PH560_10783-RA	OAV95141.1/2.0e-126/hypothetical protein PTTG_03855 [Puccinia triticina 1-1 BBBD Race 1]	NA
PH560_10783-RB	OAV95141.1/2.5e-109/hypothetical protein PTTG_03855 [Puccinia triticina 1-1 BBBD Race 1]	NA
PH560_10783-RE	OAV95141.1/2.7e-179/hypothetical protein PTTG_03855 [Puccinia triticina 1-1 BBBD Race 1]	NA
PH560_10783-RC	OAV95141.1/3.4e-179/hypothetical protein PTTG_03855 [Puccinia triticina 1-1 BBBD Race 1]	NA
PH560_10784-RA	OAV95141.1/1.0e-136/hypothetical protein PTTG_03855 [Puccinia triticina 1-1 BBBD Race 1]	NA
PH560_10784-RC	OAV95141.1/3.0e-180/hypothetical protein PTTG_03855 [Puccinia triticina 1-1 BBBD Race 1]	NA
PH560_10784-RE	OAV95141.1/1.2e-178/hypothetical protein PTTG_03855 [Puccinia triticina 1-1 BBBD Race 1]	NA
PH560_10784-RD	OAV95141.1/5.1e-177/hypothetical protein PTTG_03855 [Puccinia triticina 1-1 BBBD Race 1]	NA
PH560_10784-RB	OAV95141.1/3.7e-172/hypothetical protein PTTG_03855 [Puccinia triticina 1-1 BBBD Race 1]	NA
PH560_10784-RF	OAV95141.1/2.1e-130/hypothetical protein PTTG_03855 [Puccinia triticina 1-1 BBBD Race 1]	NA
PH560_10784-RI	OAV95141.1/5.0e-74/hypothetical protein PTTG_03855 [Puccinia triticina 1-1 BBBD Race 1]	NA
PH560_10784-RG	OAV95141.1/6.0e-144/hypothetical protein PTTG_03855 [Puccinia triticina 1-1 BBBD Race 1]	NA
PH560_10784-RH	OAV95141.1/1.2e-138/hypothetical protein PTTG_03855 [Puccinia triticina 1-1 BBBD Race 1]	NA
PH560_10784-RJ	OAV95141.1/1.7e-58/hypothetical protein PTTG_03855 [Puccinia triticina 1-1 BBBD Race 1]	NA
PH560_10787-RF	XP_003338364.2/2.7e-123/hypothetical protein PGTG_19875, partial [Puccinia graminis f. sp. tritici CRL 75-36-700-3]	sp|Q09825|SAD1_SCHPO/2.1e-24/Spindle pole body-associated protein sad1 OS=Schizosaccharomyces pombe (strain 972 / ATCC 24843) GN=sad1 PE=1 SV=1
PH560_10787-RE	XP_003338364.2/1.3e-125/hypothetical protein PGTG_19875, partial [Puccinia graminis f. sp. tritici CRL 75-36-700-3]	sp|Q09825|SAD1_SCHPO/2.1e-24/Spindle pole body-associated protein sad1 OS=Schizosaccharomyces pombe (strain 972 / ATCC 24843) GN=sad1 PE=1 SV=1
PH560_10787-RD	XP_003338364.2/2.3e-124/hypothetical protein PGTG_19875, partial [Puccinia graminis f. sp. tritici CRL 75-36-700-3]	sp|Q09825|SAD1_SCHPO/1.2e-24/Spindle pole body-associated protein sad1 OS=Schizosaccharomyces pombe (strain 972 / ATCC 24843) GN=sad1 PE=1 SV=1
PH560_10787-RG	XP_003338364.2/4.3e-123/hypothetical protein PGTG_19875, partial [Puccinia graminis f. sp. tritici CRL 75-36-700-3]	sp|Q09825|SAD1_SCHPO/2.0e-24/Spindle pole body-associated protein sad1 OS=Schizosaccharomyces pombe (strain 972 / ATCC 24843) GN=sad1 PE=1 SV=1
PH560_10787-RA	XP_003338160.2/5.3e-31/hypothetical protein PGTG_19725 [Puccinia graminis f. sp. tritici CRL 75-36-700-3]	sp|Q09825|SAD1_SCHPO/2.0e-06/Spindle pole body-associated protein sad1 OS=Schizosaccharomyces pombe (strain 972 / ATCC 24843) GN=sad1 PE=1 SV=1
PH560_10787-RC	XP_003338364.2/9.5e-106/hypothetical protein PGTG_19875, partial [Puccinia graminis f. sp. tritici CRL 75-36-700-3]	sp|Q09825|SAD1_SCHPO/2.3e-24/Spindle pole body-associated protein sad1 OS=Schizosaccharomyces pombe (strain 972 / ATCC 24843) GN=sad1 PE=1 SV=1
PH560_10787-RB	XP_003338160.2/2.7e-76/hypothetical protein PGTG_19725 [Puccinia graminis f. sp. tritici CRL 75-36-700-3]	sp|Q09825|SAD1_SCHPO/4.9e-22/Spindle pole body-associated protein sad1 OS=Schizosaccharomyces pombe (strain 972 / ATCC 24843) GN=sad1 PE=1 SV=1
PH560_10793-RA	OAV92441.1/2.9e-63/hypothetical protein PTTG_27648 [Puccinia triticina 1-1 BBBD Race 1]	NA
PH560_10793-RB	KNE98634.1/1.4e-20/hypothetical protein PSTG_08003, partial [Puccinia striiformis f. sp. tritici PST-78]	NA
PH560_10793-RC	KNE98634.1/1.6e-12/hypothetical protein PSTG_08003, partial [Puccinia striiformis f. sp. tritici PST-78]	NA
PH560_10785-RA	XP_003338366.2/6.0e-115/hypothetical protein PGTG_19877 [Puccinia graminis f. sp. tritici CRL 75-36-700-3]	NA
PH560_10785-RB	NA	NA
PH560_10785-RC	XP_003338366.2/3.3e-64/hypothetical protein PGTG_19877 [Puccinia graminis f. sp. tritici CRL 75-36-700-3]	NA
PH560_10788-RA	XP_003338365.1/3.8e-93/hypothetical protein PGTG_19876 [Puccinia graminis f. sp. tritici CRL 75-36-700-3]	NA
PH560_10788-RB	XP_003338365.1/9.2e-53/hypothetical protein PGTG_19876 [Puccinia graminis f. sp. tritici CRL 75-36-700-3]	NA
PH560_10791-RB	KNZ47082.1/2.1e-35/hypothetical protein VP01_66g14 [Puccinia sorghi]	NA
PH560_10791-RA	KNZ47082.1/7.4e-221/hypothetical protein VP01_66g14 [Puccinia sorghi]	NA
PH560_10789-RA	OAV84821.1/6.1e-23/hypothetical protein PTTG_31031, partial [Puccinia triticina 1-1 BBBD Race 1]	NA
PH560_10789-RB	OAV85061.1/1.0e-33/hypothetical protein PTTG_30826, partial [Puccinia triticina 1-1 BBBD Race 1]	NA
PH560_10786-RA	KNF03170.1/5.5e-14/hypothetical protein PSTG_03757 [Puccinia striiformis f. sp. tritici PST-78]	NA
PH560_10794-RA	KNF02367.1/3.0e-19/hypothetical protein PSTG_04275 [Puccinia striiformis f. sp. tritici PST-78]	NA
PH560_10801-RA	XP_016269199.1/1.2e-225/retrotransposon polyprotein [Rhodotorula toruloides NP11]	sp|Q99315|YG31B_YEAST/2.1e-107/Transposon Ty3-G Gag-Pol polyprotein OS=Saccharomyces cerevisiae (strain ATCC 204508 / S288c) GN=TY3B-G PE=1 SV=3
PH560_10801-RB	NA	NA
PH560_10803-RA	OAV95424.1/1.3e-166/hypothetical protein PTTG_26673 [Puccinia triticina 1-1 BBBD Race 1]	NA
PH560_10802-RB	OAV92205.1/1.5e-260/hypothetical protein PTTG_27699 [Puccinia triticina 1-1 BBBD Race 1]	sp|Q7S1P9|RAD5_NEUCR/2.8e-25/DNA repair protein rad5 OS=Neurospora crassa (strain ATCC 24698 / 74-OR23-1A / CBS 708.71 / DSM 1257 / FGSC 987) GN=mus-41 PE=3 SV=3
PH560_10802-RG	OAV95422.1/2.8e-128/hypothetical protein PTTG_26671 [Puccinia triticina 1-1 BBBD Race 1]	sp|P36607|RAD5_SCHPO/3.7e-21/DNA repair protein rad8 OS=Schizosaccharomyces pombe (strain 972 / ATCC 24843) GN=rad8 PE=1 SV=1
PH560_10802-RA	OAV92205.1/1.5e-126/hypothetical protein PTTG_27699 [Puccinia triticina 1-1 BBBD Race 1]	sp|O60177|YG42_SCHPO/2.3e-15/Uncharacterized ATP-dependent helicase C23E6.02 OS=Schizosaccharomyces pombe (strain 972 / ATCC 24843) GN=SPBC23E6.02 PE=3 SV=1
PH560_10802-RC	OAV95421.1/3.6e-137/hypothetical protein PTTG_26670 [Puccinia triticina 1-1 BBBD Race 1]	NA
PH560_10802-RD	KNF06407.1/2.5e-152/hypothetical protein PSTG_00290 [Puccinia striiformis f. sp. tritici PST-78]	sp|Q6CJM4|RAD5_KLULA/2.5e-24/DNA repair protein RAD5 OS=Kluyveromyces lactis (strain ATCC 8585 / CBS 2359 / DSM 70799 / NBRC 1267 / NRRL Y-1140 / WM37) GN=RAD5 PE=3 SV=1
PH560_10802-RE	KNF06407.1/1.1e-123/hypothetical protein PSTG_00290 [Puccinia striiformis f. sp. tritici PST-78]	sp|Q6CJM4|RAD5_KLULA/1.9e-24/DNA repair protein RAD5 OS=Kluyveromyces lactis (strain ATCC 8585 / CBS 2359 / DSM 70799 / NBRC 1267 / NRRL Y-1140 / WM37) GN=RAD5 PE=3 SV=1
PH560_10802-RH	OAV92205.1/1.1e-21/hypothetical protein PTTG_27699 [Puccinia triticina 1-1 BBBD Race 1]	sp|Q5ACX1|RAD5_CANAL/1.1e-10/DNA repair protein RAD5 OS=Candida albicans (strain SC5314 / ATCC MYA-2876) GN=RAD5 PE=3 SV=2
PH560_10804-RC	OAV86433.1/4.0e-88/hypothetical protein PTTG_06770 [Puccinia triticina 1-1 BBBD Race 1]	NA
PH560_10804-RA	OAV86433.1/1.1e-136/hypothetical protein PTTG_06770 [Puccinia triticina 1-1 BBBD Race 1]	NA
PH560_10804-RB	OAV86433.1/2.3e-97/hypothetical protein PTTG_06770 [Puccinia triticina 1-1 BBBD Race 1]	NA
PH560_10804-RD	NA	NA
PH560_10796-RA	KNE91264.1/6.1e-44/hypothetical protein PSTG_15329 [Puccinia striiformis f. sp. tritici PST-78]	NA
PH560_10796-RB	KNE91264.1/9.1e-54/hypothetical protein PSTG_15329 [Puccinia striiformis f. sp. tritici PST-78]	NA
PH560_10796-RC	KNE91264.1/1.7e-26/hypothetical protein PSTG_15329 [Puccinia striiformis f. sp. tritici PST-78]	NA
PH560_10796-RD	KNE91264.1/1.9e-18/hypothetical protein PSTG_15329 [Puccinia striiformis f. sp. tritici PST-78]	NA
PH560_10799-RA	XP_003333775.1/3.9e-50/minichromosome maintenance protein 2 [Puccinia graminis f. sp. tritici CRL 75-36-700-3]	sp|P40377|MCM2_SCHPO/8.4e-34/DNA replication licensing factor mcm2 OS=Schizosaccharomyces pombe (strain 972 / ATCC 24843) GN=mcm2 PE=1 SV=1
PH560_10795-RB	KNZ50084.1/2.2e-09/hypothetical protein VP01_4606g2, partial [Puccinia sorghi]	NA
PH560_10795-RA	NA	NA
PH560_10795-RD	NA	NA
PH560_10795-RC	NA	NA
PH560_10795-RQ	KNZ50084.1/7.0e-19/hypothetical protein VP01_4606g2, partial [Puccinia sorghi]	NA
PH560_10795-RP	KNZ50084.1/6.3e-19/hypothetical protein VP01_4606g2, partial [Puccinia sorghi]	NA
PH560_10795-RT	KNE88932.1/3.0e-18/hypothetical protein PSTG_17618, partial [Puccinia striiformis f. sp. tritici PST-78]	NA
PH560_10795-RI	KNE88932.1/1.9e-17/hypothetical protein PSTG_17618, partial [Puccinia striiformis f. sp. tritici PST-78]	NA
PH560_10795-RO	KNZ50084.1/5.6e-19/hypothetical protein VP01_4606g2, partial [Puccinia sorghi]	NA
PH560_10795-RH	KNE88932.1/2.9e-14/hypothetical protein PSTG_17618, partial [Puccinia striiformis f. sp. tritici PST-78]	NA
PH560_10795-RN	KNZ50084.1/7.0e-18/hypothetical protein VP01_4606g2, partial [Puccinia sorghi]	NA
PH560_10795-RG	KNE88932.1/8.9e-12/hypothetical protein PSTG_17618, partial [Puccinia striiformis f. sp. tritici PST-78]	NA
PH560_10795-RM	KNZ50084.1/2.7e-15/hypothetical protein VP01_4606g2, partial [Puccinia sorghi]	NA
PH560_10795-RS	KNZ50084.1/1.0e-11/hypothetical protein VP01_4606g2, partial [Puccinia sorghi]	NA
PH560_10795-RL	KNZ50084.1/8.3e-14/hypothetical protein VP01_4606g2, partial [Puccinia sorghi]	NA
PH560_10795-RF	KNE88932.1/7.7e-09/hypothetical protein PSTG_17618, partial [Puccinia striiformis f. sp. tritici PST-78]	NA
PH560_10795-RK	KNZ50084.1/2.2e-10/hypothetical protein VP01_4606g2, partial [Puccinia sorghi]	NA
PH560_10795-RR	KNZ61150.1/4.6e-10/hypothetical protein VP01_14462g1 [Puccinia sorghi]	NA
PH560_10795-RJ	KNZ50084.1/1.7e-09/hypothetical protein VP01_4606g2, partial [Puccinia sorghi]	NA
PH560_10795-RE	NA	NA
PH560_10798-RA	XP_003338115.1/2.1e-18/hypothetical protein PGTG_19665 [Puccinia graminis f. sp. tritici CRL 75-36-700-3]	NA
PH560_10800-RA	KNZ51673.1/2.9e-20/uncharacterized protein VP01_386g17 [Puccinia sorghi]	NA
PH560_10797-RA	KNZ51161.1/4.8e-24/hypothetical protein VP01_4063g2 [Puccinia sorghi]	NA
PH560_10815-RC	KNZ55400.1/3.9e-268/hypothetical protein VP01_2694g2 [Puccinia sorghi]	sp|Q12193|YB12B_YEAST/3.2e-25/Transposon Ty1-BR Gag-Pol polyprotein OS=Saccharomyces cerevisiae (strain ATCC 204508 / S288c) GN=TY1B-BR PE=3 SV=1
PH560_10815-RA	KNZ55400.1/3.6e-180/hypothetical protein VP01_2694g2 [Puccinia sorghi]	sp|Q12491|YB21B_YEAST/1.0e-17/Transposon Ty2-B Gag-Pol polyprotein OS=Saccharomyces cerevisiae (strain ATCC 204508 / S288c) GN=TY2B-B PE=3 SV=1
PH560_10815-RB	KNZ55400.1/1.6e-269/hypothetical protein VP01_2694g2 [Puccinia sorghi]	sp|Q12193|YB12B_YEAST/3.2e-25/Transposon Ty1-BR Gag-Pol polyprotein OS=Saccharomyces cerevisiae (strain ATCC 204508 / S288c) GN=TY1B-BR PE=3 SV=1
PH560_10809-RI	OAV87419.1/6.6e-154/hypothetical protein PTTG_03316 [Puccinia triticina 1-1 BBBD Race 1]	NA
PH560_10809-RC	OAV87419.1/6.6e-198/hypothetical protein PTTG_03316 [Puccinia triticina 1-1 BBBD Race 1]	NA
PH560_10809-RB	OAV87419.1/4.9e-212/hypothetical protein PTTG_03316 [Puccinia triticina 1-1 BBBD Race 1]	NA
PH560_10809-RH	OAV87419.1/1.3e-176/hypothetical protein PTTG_03316 [Puccinia triticina 1-1 BBBD Race 1]	NA
PH560_10809-RN	KNE98224.1/2.3e-61/hypothetical protein PSTG_08494 [Puccinia striiformis f. sp. tritici PST-78]	NA
PH560_10809-RD	OAV87419.1/2.1e-197/hypothetical protein PTTG_03316 [Puccinia triticina 1-1 BBBD Race 1]	NA
PH560_10809-RG	OAV87419.1/1.4e-182/hypothetical protein PTTG_03316 [Puccinia triticina 1-1 BBBD Race 1]	NA
PH560_10809-RA	OAV92207.1/1.1e-124/hypothetical protein PTTG_03279 [Puccinia triticina 1-1 BBBD Race 1]	NA
PH560_10809-RE	OAV92207.1/4.6e-144/hypothetical protein PTTG_03279 [Puccinia triticina 1-1 BBBD Race 1]	NA
PH560_10809-RK	OAV87419.1/6.6e-156/hypothetical protein PTTG_03316 [Puccinia triticina 1-1 BBBD Race 1]	NA
PH560_10809-RJ	OAV87419.1/4.4e-141/hypothetical protein PTTG_03316 [Puccinia triticina 1-1 BBBD Race 1]	NA
PH560_10809-RF	OAV92207.1/7.1e-127/hypothetical protein PTTG_03279 [Puccinia triticina 1-1 BBBD Race 1]	NA
PH560_10809-RL	OAV87419.1/9.7e-134/hypothetical protein PTTG_03316 [Puccinia triticina 1-1 BBBD Race 1]	NA
PH560_10809-RM	KNF06368.1/8.3e-107/hypothetical protein PSTG_00251 [Puccinia striiformis f. sp. tritici PST-78]	NA
PH560_10809-RO	NA	NA
PH560_10807-RA	KNZ55621.1/4.3e-137/uncharacterized protein VP01_262g3, partial [Puccinia sorghi]	NA
PH560_10807-RB	NA	NA
PH560_10817-RC	OAV95141.1/1.7e-177/hypothetical protein PTTG_03855 [Puccinia triticina 1-1 BBBD Race 1]	NA
PH560_10817-RA	OAV95141.1/2.2e-79/hypothetical protein PTTG_03855 [Puccinia triticina 1-1 BBBD Race 1]	NA
PH560_10817-RE	OAV95141.1/1.4e-215/hypothetical protein PTTG_03855 [Puccinia triticina 1-1 BBBD Race 1]	NA
PH560_10817-RD	OAV95141.1/2.8e-191/hypothetical protein PTTG_03855 [Puccinia triticina 1-1 BBBD Race 1]	NA
PH560_10817-RB	OAV95141.1/3.1e-159/hypothetical protein PTTG_03855 [Puccinia triticina 1-1 BBBD Race 1]	NA
PH560_10816-RA	KNZ51387.1/7.2e-77/hypothetical protein VP01_3973g1 [Puccinia sorghi]	NA
PH560_10816-RD	KNZ60244.1/7.1e-91/hypothetical protein VP01_158g13 [Puccinia sorghi]	NA
PH560_10816-RC	KNZ60244.1/3.3e-70/hypothetical protein VP01_158g13 [Puccinia sorghi]	NA
PH560_10816-RB	KNZ60244.1/8.5e-30/hypothetical protein VP01_158g13 [Puccinia sorghi]	NA
PH560_10806-RD	OAV92206.1/9.4e-100/hypothetical protein PTTG_03280 [Puccinia triticina 1-1 BBBD Race 1]	NA
PH560_10806-RC	OAV92206.1/1.2e-132/hypothetical protein PTTG_03280 [Puccinia triticina 1-1 BBBD Race 1]	NA
PH560_10806-RB	OAV92206.1/1.5e-56/hypothetical protein PTTG_03280 [Puccinia triticina 1-1 BBBD Race 1]	NA
PH560_10806-RA	OAV92206.1/7.5e-46/hypothetical protein PTTG_03280 [Puccinia triticina 1-1 BBBD Race 1]	NA
PH560_10806-RE	OAV92206.1/8.8e-41/hypothetical protein PTTG_03280 [Puccinia triticina 1-1 BBBD Race 1]	NA
PH560_10813-RA	XP_003338366.2/1.2e-115/hypothetical protein PGTG_19877 [Puccinia graminis f. sp. tritici CRL 75-36-700-3]	NA
PH560_10813-RC	XP_003338366.2/2.5e-64/hypothetical protein PGTG_19877 [Puccinia graminis f. sp. tritici CRL 75-36-700-3]	NA
PH560_10810-RD	KNZ47828.1/1.1e-63/hypothetical protein VP01_6103g1, partial [Puccinia sorghi]	NA
PH560_10810-RE	KNZ47828.1/4.8e-62/hypothetical protein VP01_6103g1, partial [Puccinia sorghi]	NA
PH560_10810-RC	KNZ47828.1/3.0e-61/hypothetical protein VP01_6103g1, partial [Puccinia sorghi]	NA
PH560_10810-RB	NA	NA
PH560_10810-RA	KNZ46909.1/2.3e-13/hypothetical protein VP01_6847g1 [Puccinia sorghi]	NA
PH560_10812-RC	OAV95141.1/3.6e-72/hypothetical protein PTTG_03855 [Puccinia triticina 1-1 BBBD Race 1]	NA
PH560_10812-RA	OAV95141.1/9.7e-113/hypothetical protein PTTG_03855 [Puccinia triticina 1-1 BBBD Race 1]	NA
PH560_10812-RD	OAV95141.1/1.5e-84/hypothetical protein PTTG_03855 [Puccinia triticina 1-1 BBBD Race 1]	NA
PH560_10812-RE	OAV95141.1/1.3e-55/hypothetical protein PTTG_03855 [Puccinia triticina 1-1 BBBD Race 1]	NA
PH560_10812-RB	NA	NA
PH560_10805-RA	OAV88060.1/2.8e-47/hypothetical protein PTTG_29166 [Puccinia triticina 1-1 BBBD Race 1]	NA
PH560_10805-RC	OAV88060.1/6.3e-42/hypothetical protein PTTG_29166 [Puccinia triticina 1-1 BBBD Race 1]	NA
PH560_10805-RB	OAV88060.1/4.5e-29/hypothetical protein PTTG_29166 [Puccinia triticina 1-1 BBBD Race 1]	NA
PH560_10811-RA	OAV87741.1/1.1e-18/hypothetical protein PTTG_29300 [Puccinia triticina 1-1 BBBD Race 1]	NA
PH560_10814-RA	KNZ45271.1/3.4e-19/hypothetical protein VP01_830g3, partial [Puccinia sorghi]	NA
PH560_10814-RB	KNZ45271.1/1.3e-11/hypothetical protein VP01_830g3, partial [Puccinia sorghi]	NA
PH560_10808-RA	OAV92206.1/9.6e-22/hypothetical protein PTTG_03280 [Puccinia triticina 1-1 BBBD Race 1]	NA
PH560_10822-RB	KNE93182.1/1.0e-306/hypothetical protein PSTG_13434 [Puccinia striiformis f. sp. tritici PST-78]	sp|Q12141|YG11B_YEAST/1.9e-36/Transposon Ty1-GR1 Gag-Pol polyprotein OS=Saccharomyces cerevisiae (strain ATCC 204508 / S288c) GN=TY1B-GR1 PE=3 SV=1
PH560_10822-RA	KNE93182.1/2.2e-311/hypothetical protein PSTG_13434 [Puccinia striiformis f. sp. tritici PST-78]	sp|Q12490|YB11B_YEAST/2.0e-36/Transposon Ty1-BL Gag-Pol polyprotein OS=Saccharomyces cerevisiae (strain ATCC 204508 / S288c) GN=TY1B-BL PE=1 SV=1
PH560_10822-RC	KNE93182.1/2.5e-305/hypothetical protein PSTG_13434 [Puccinia striiformis f. sp. tritici PST-78]	sp|Q12490|YB11B_YEAST/1.9e-36/Transposon Ty1-BL Gag-Pol polyprotein OS=Saccharomyces cerevisiae (strain ATCC 204508 / S288c) GN=TY1B-BL PE=1 SV=1
PH560_10822-RD	KNE93182.1/8.6e-303/hypothetical protein PSTG_13434 [Puccinia striiformis f. sp. tritici PST-78]	sp|Q12141|YG11B_YEAST/1.9e-36/Transposon Ty1-GR1 Gag-Pol polyprotein OS=Saccharomyces cerevisiae (strain ATCC 204508 / S288c) GN=TY1B-GR1 PE=3 SV=1
PH560_10822-RE	KNE93182.1/1.4e-258/hypothetical protein PSTG_13434 [Puccinia striiformis f. sp. tritici PST-78]	sp|Q12141|YG11B_YEAST/1.5e-36/Transposon Ty1-GR1 Gag-Pol polyprotein OS=Saccharomyces cerevisiae (strain ATCC 204508 / S288c) GN=TY1B-GR1 PE=3 SV=1
PH560_10820-RA	XP_016269199.1/5.3e-193/retrotransposon polyprotein [Rhodotorula toruloides NP11]	sp|P0CT40|TF29_SCHPO/2.6e-88/Transposon Tf2-9 polyprotein OS=Schizosaccharomyces pombe (strain 972 / ATCC 24843) GN=Tf2-9 PE=3 SV=1
PH560_10820-RB	XP_016269199.1/5.1e-193/retrotransposon polyprotein [Rhodotorula toruloides NP11]	sp|P0CT40|TF29_SCHPO/2.5e-88/Transposon Tf2-9 polyprotein OS=Schizosaccharomyces pombe (strain 972 / ATCC 24843) GN=Tf2-9 PE=3 SV=1
PH560_10821-RA	KNE89938.1/7.1e-144/hypothetical protein PSTG_16603, partial [Puccinia striiformis f. sp. tritici PST-78]	sp|Q99315|YG31B_YEAST/5.2e-51/Transposon Ty3-G Gag-Pol polyprotein OS=Saccharomyces cerevisiae (strain ATCC 204508 / S288c) GN=TY3B-G PE=1 SV=3
PH560_10821-RB	NA	NA
PH560_10824-RB	OAV88499.1/1.4e-83/hypothetical protein PTTG_29011 [Puccinia triticina 1-1 BBBD Race 1]	NA
PH560_10824-RD	OAV89634.1/3.5e-80/hypothetical protein PTTG_28618 [Puccinia triticina 1-1 BBBD Race 1]	NA
PH560_10824-RA	KNE90582.1/3.2e-140/hypothetical protein PSTG_15975 [Puccinia striiformis f. sp. tritici PST-78]	NA
PH560_10824-RC	KNE90582.1/5.1e-140/hypothetical protein PSTG_15975 [Puccinia striiformis f. sp. tritici PST-78]	NA
PH560_10819-RA	OAV93275.1/4.7e-69/hypothetical protein PTTG_27361 [Puccinia triticina 1-1 BBBD Race 1]	NA
PH560_10819-RB	XP_003323137.2/4.4e-63/hypothetical protein PGTG_04674 [Puccinia graminis f. sp. tritici CRL 75-36-700-3]	NA
PH560_10823-RA	KNF02424.1/1.1e-18/hypothetical protein PSTG_04330 [Puccinia striiformis f. sp. tritici PST-78]	NA
PH560_10823-RB	KNF02424.1/1.0e-14/hypothetical protein PSTG_04330 [Puccinia striiformis f. sp. tritici PST-78]	NA
PH560_10818-RA	KNF02367.1/3.0e-19/hypothetical protein PSTG_04275 [Puccinia striiformis f. sp. tritici PST-78]	NA
PH560_22871-RA	OAV87578.1/4.2e-29/hypothetical protein PTTG_29381 [Puccinia triticina 1-1 BBBD Race 1]	NA
PH560_22872-RA	KNZ46318.1/1.2e-19/hypothetical protein VP01_7360g1, partial [Puccinia sorghi]	NA
PH560_22872-RB	NA	NA
PH560_22870-RA	KNZ59801.1/4.4e-18/hypothetical protein VP01_1660g13 [Puccinia sorghi]	NA
PH560_17567-RC	KNF05681.1/0.0e+00/hypothetical protein PSTG_01084 [Puccinia striiformis f. sp. tritici PST-78]	NA
PH560_17567-RB	KNF05681.1/1.7e-275/hypothetical protein PSTG_01084 [Puccinia striiformis f. sp. tritici PST-78]	NA
PH560_17567-RK	OAV85817.1/1.3e-272/hypothetical protein PTTG_30248 [Puccinia triticina 1-1 BBBD Race 1]	NA
PH560_17567-RM	OAV85817.1/3.1e-285/hypothetical protein PTTG_30248 [Puccinia triticina 1-1 BBBD Race 1]	NA
PH560_17567-RL	OAV85817.1/1.6e-286/hypothetical protein PTTG_30248 [Puccinia triticina 1-1 BBBD Race 1]	NA
PH560_17567-RJ	OAV85817.1/1.1e-286/hypothetical protein PTTG_30248 [Puccinia triticina 1-1 BBBD Race 1]	NA
PH560_17567-RI	OAV85817.1/1.9e-227/hypothetical protein PTTG_30248 [Puccinia triticina 1-1 BBBD Race 1]	NA
PH560_17567-RH	OAV85817.1/2.7e-203/hypothetical protein PTTG_30248 [Puccinia triticina 1-1 BBBD Race 1]	NA
PH560_17567-RF	OAV85817.1/7.8e-211/hypothetical protein PTTG_30248 [Puccinia triticina 1-1 BBBD Race 1]	NA
PH560_17567-RD	OAV93275.1/1.9e-114/hypothetical protein PTTG_27361 [Puccinia triticina 1-1 BBBD Race 1]	NA
PH560_17567-RE	OAV85817.1/2.3e-73/hypothetical protein PTTG_30248 [Puccinia triticina 1-1 BBBD Race 1]	NA
PH560_17567-RP	KNF05681.1/4.9e-103/hypothetical protein PSTG_01084 [Puccinia striiformis f. sp. tritici PST-78]	NA
PH560_17567-RN	KNF05681.1/1.0e-94/hypothetical protein PSTG_01084 [Puccinia striiformis f. sp. tritici PST-78]	NA
PH560_17567-RO	OAV85817.1/1.9e-39/hypothetical protein PTTG_30248 [Puccinia triticina 1-1 BBBD Race 1]	NA
PH560_17567-RG	OAV85817.1/1.3e-227/hypothetical protein PTTG_30248 [Puccinia triticina 1-1 BBBD Race 1]	NA
PH560_17567-RA	KNF05681.1/3.9e-172/hypothetical protein PSTG_01084 [Puccinia striiformis f. sp. tritici PST-78]	NA
PH560_17573-RE	OAV85817.1/4.6e-189/hypothetical protein PTTG_30248 [Puccinia triticina 1-1 BBBD Race 1]	NA
PH560_17573-RD	OAV85817.1/3.8e-203/hypothetical protein PTTG_30248 [Puccinia triticina 1-1 BBBD Race 1]	NA
PH560_17573-RA	OAV93275.1/1.1e-114/hypothetical protein PTTG_27361 [Puccinia triticina 1-1 BBBD Race 1]	NA
PH560_17573-RC	OAV85817.1/9.4e-145/hypothetical protein PTTG_30248 [Puccinia triticina 1-1 BBBD Race 1]	NA
PH560_17573-RB	OAV85817.1/1.9e-75/hypothetical protein PTTG_30248 [Puccinia triticina 1-1 BBBD Race 1]	NA
PH560_17573-RI	KNF05681.1/1.1e-102/hypothetical protein PSTG_01084 [Puccinia striiformis f. sp. tritici PST-78]	NA
PH560_17573-RF	KNF05681.1/4.7e-95/hypothetical protein PSTG_01084 [Puccinia striiformis f. sp. tritici PST-78]	NA
PH560_17573-RH	OAV85817.1/3.9e-40/hypothetical protein PTTG_30248 [Puccinia triticina 1-1 BBBD Race 1]	NA
PH560_17573-RG	KNF05681.1/9.3e-100/hypothetical protein PSTG_01084 [Puccinia striiformis f. sp. tritici PST-78]	NA
PH560_17575-RA	KNF06763.1/4.4e-68/AGC protein kinase [Puccinia striiformis f. sp. tritici PST-78]	sp|P05986|KAPC_YEAST/8.7e-29/cAMP-dependent protein kinase type 3 OS=Saccharomyces cerevisiae (strain ATCC 204508 / S288c) GN=TPK3 PE=1 SV=2
PH560_17574-RA	OAV90687.1/3.2e-79/hypothetical protein PTTG_06548 [Puccinia triticina 1-1 BBBD Race 1]	NA
PH560_17574-RC	OAV86838.1/1.7e-65/hypothetical protein PTTG_29706 [Puccinia triticina 1-1 BBBD Race 1]	NA
PH560_17574-RB	OAV86838.1/1.6e-61/hypothetical protein PTTG_29706 [Puccinia triticina 1-1 BBBD Race 1]	NA
PH560_17568-RA	XP_003334798.1/4.0e-100/hypothetical protein PGTG_16139 [Puccinia graminis f. sp. tritici CRL 75-36-700-3]	sp|Q5AGD1|APTH1_CANAL/4.0e-20/Acyl-protein thioesterase 1 OS=Candida albicans (strain SC5314 / ATCC MYA-2876) GN=CAALFM_C502400WA PE=3 SV=2
PH560_17568-RB	XP_003334798.1/4.6e-88/hypothetical protein PGTG_16139 [Puccinia graminis f. sp. tritici CRL 75-36-700-3]	sp|Q5AGD1|APTH1_CANAL/3.0e-20/Acyl-protein thioesterase 1 OS=Candida albicans (strain SC5314 / ATCC MYA-2876) GN=CAALFM_C502400WA PE=3 SV=2
PH560_17572-RA	OAV96716.1/8.6e-132/hypothetical protein PTTG_26222 [Puccinia triticina 1-1 BBBD Race 1]	NA
PH560_17569-RA	OAV97004.1/7.3e-20/hypothetical protein PTTG_26213 [Puccinia triticina 1-1 BBBD Race 1]	NA
PH560_17571-RA	XP_003889399.1/3.7e-31/hypothetical protein PGTG_21948 [Puccinia graminis f. sp. tritici CRL 75-36-700-3]	NA
PH560_17570-RA	OAV97004.1/1.1e-19/hypothetical protein PTTG_26213 [Puccinia triticina 1-1 BBBD Race 1]	NA
PH560_17576-RB	XP_003335614.1/1.1e-21/hypothetical protein PGTG_16386 [Puccinia graminis f. sp. tritici CRL 75-36-700-3]	NA
PH560_17576-RA	XP_003335614.1/2.6e-27/hypothetical protein PGTG_16386 [Puccinia graminis f. sp. tritici CRL 75-36-700-3]	NA
PH560_17579-RB	KNZ62523.1/6.9e-130/hypothetical protein VP01_125g8 [Puccinia sorghi]	sp|Q99337|YN12B_YEAST/4.3e-28/Transposon Ty1-NL2 Gag-Pol polyprotein OS=Saccharomyces cerevisiae (strain ATCC 204508 / S288c) GN=TY1B-NL2 PE=3 SV=1
PH560_17579-RD	OJT11499.1/1.2e-129/Retrovirus-related Pol polyprotein from transposon TNT 1-94, partial [Trametes pubescens]	sp|Q99337|YN12B_YEAST/4.3e-28/Transposon Ty1-NL2 Gag-Pol polyprotein OS=Saccharomyces cerevisiae (strain ATCC 204508 / S288c) GN=TY1B-NL2 PE=3 SV=1
PH560_17579-RA	KNZ62523.1/1.3e-131/hypothetical protein VP01_125g8 [Puccinia sorghi]	sp|Q99337|YN12B_YEAST/4.5e-28/Transposon Ty1-NL2 Gag-Pol polyprotein OS=Saccharomyces cerevisiae (strain ATCC 204508 / S288c) GN=TY1B-NL2 PE=3 SV=1
PH560_17579-RC	KNZ62523.1/1.0e-131/hypothetical protein VP01_125g8 [Puccinia sorghi]	sp|Q99337|YN12B_YEAST/4.5e-28/Transposon Ty1-NL2 Gag-Pol polyprotein OS=Saccharomyces cerevisiae (strain ATCC 204508 / S288c) GN=TY1B-NL2 PE=3 SV=1
PH560_17579-RE	NA	NA
PH560_17586-RA	XP_003889256.1/7.0e-85/hypothetical protein PGTG_22034 [Puccinia graminis f. sp. tritici CRL 75-36-700-3]	NA
PH560_17582-RB	KNZ43910.1/6.5e-230/hypothetical protein VP01_972g11 [Puccinia sorghi]	sp|O13724|ZPR1_SCHPO/4.5e-111/Zinc finger protein zpr1 OS=Schizosaccharomyces pombe (strain 972 / ATCC 24843) GN=zpr1 PE=3 SV=1
PH560_17582-RE	KNZ43910.1/1.4e-197/hypothetical protein VP01_972g11 [Puccinia sorghi]	sp|O13724|ZPR1_SCHPO/1.1e-95/Zinc finger protein zpr1 OS=Schizosaccharomyces pombe (strain 972 / ATCC 24843) GN=zpr1 PE=3 SV=1
PH560_17582-RD	KNZ43910.1/3.0e-182/hypothetical protein VP01_972g11 [Puccinia sorghi]	sp|O13724|ZPR1_SCHPO/1.5e-93/Zinc finger protein zpr1 OS=Schizosaccharomyces pombe (strain 972 / ATCC 24843) GN=zpr1 PE=3 SV=1
PH560_17582-RC	KNZ43910.1/4.7e-169/hypothetical protein VP01_972g11 [Puccinia sorghi]	sp|O13724|ZPR1_SCHPO/3.5e-84/Zinc finger protein zpr1 OS=Schizosaccharomyces pombe (strain 972 / ATCC 24843) GN=zpr1 PE=3 SV=1
PH560_17582-RA	KNZ43910.1/2.7e-71/hypothetical protein VP01_972g11 [Puccinia sorghi]	sp|O13724|ZPR1_SCHPO/1.9e-45/Zinc finger protein zpr1 OS=Schizosaccharomyces pombe (strain 972 / ATCC 24843) GN=zpr1 PE=3 SV=1
PH560_17577-RB	OAV90673.1/2.0e-180/hypothetical protein PTTG_28230 [Puccinia triticina 1-1 BBBD Race 1]	NA
PH560_17577-RA	OAV90673.1/1.1e-113/hypothetical protein PTTG_28230 [Puccinia triticina 1-1 BBBD Race 1]	NA
PH560_17581-RA	OAV93767.1/1.7e-150/hypothetical protein PTTG_12364 [Puccinia triticina 1-1 BBBD Race 1]	sp|Q9P7W5|RIO2_SCHPO/2.2e-46/Serine/threonine-protein kinase rio2 OS=Schizosaccharomyces pombe (strain 972 / ATCC 24843) GN=rio2 PE=3 SV=2
PH560_17589-RA	OAV93782.1/1.4e-153/hypothetical protein PTTG_06246 [Puccinia triticina 1-1 BBBD Race 1]	sp|P87219|SOU1_CANAL/7.4e-51/Sorbose reductase SOU1 OS=Candida albicans (strain SC5314 / ATCC MYA-2876) GN=SOU1 PE=1 SV=1
PH560_17589-RB	OAV93782.1/5.6e-126/hypothetical protein PTTG_06246 [Puccinia triticina 1-1 BBBD Race 1]	sp|P50167|ARDH_PICST/3.6e-37/D-arabinitol 2-dehydrogenase [ribulose-forming] OS=Scheffersomyces stipitis (strain ATCC 58785 / CBS 6054 / NBRC 10063 / NRRL Y-11545) GN=ARDH PE=2 SV=1
PH560_17587-RB	XP_003338497.1/4.4e-59/hypothetical protein PGTG_19981 [Puccinia graminis f. sp. tritici CRL 75-36-700-3]	NA
PH560_17587-RA	XP_003326405.2/1.6e-14/hypothetical protein PGTG_08235 [Puccinia graminis f. sp. tritici CRL 75-36-700-3]	NA
PH560_17595-RA	OAV88643.1/3.3e-111/hypothetical protein PTTG_10283 [Puccinia triticina 1-1 BBBD Race 1]	NA
PH560_17595-RC	OAV88643.1/3.4e-79/hypothetical protein PTTG_10283 [Puccinia triticina 1-1 BBBD Race 1]	NA
PH560_17595-RB	OAV88643.1/8.3e-95/hypothetical protein PTTG_10283 [Puccinia triticina 1-1 BBBD Race 1]	NA
PH560_17595-RD	OAV84878.1/4.2e-32/hypothetical protein PTTG_10952, partial [Puccinia triticina 1-1 BBBD Race 1]	NA
PH560_17585-RA	KNE88595.1/3.8e-75/hypothetical protein PSTG_17987 [Puccinia striiformis f. sp. tritici PST-78]	NA
PH560_17580-RA	OAV93765.1/4.5e-78/hypothetical protein PTTG_06239 [Puccinia triticina 1-1 BBBD Race 1]	NA
PH560_17580-RB	OAV93765.1/6.5e-113/hypothetical protein PTTG_06239 [Puccinia triticina 1-1 BBBD Race 1]	NA
PH560_17592-RE	KNF05677.1/6.7e-48/hypothetical protein PSTG_01080 [Puccinia striiformis f. sp. tritici PST-78]	NA
PH560_17592-RD	XP_003331542.1/1.7e-45/hypothetical protein PGTG_13342 [Puccinia graminis f. sp. tritici CRL 75-36-700-3]	NA
PH560_17592-RC	KNF05677.1/7.9e-30/hypothetical protein PSTG_01080 [Puccinia striiformis f. sp. tritici PST-78]	NA
PH560_17592-RB	XP_003326646.1/1.7e-17/hypothetical protein PGTG_07624 [Puccinia graminis f. sp. tritici CRL 75-36-700-3]	NA
PH560_17592-RA	XP_003326646.1/5.3e-16/hypothetical protein PGTG_07624 [Puccinia graminis f. sp. tritici CRL 75-36-700-3]	NA
PH560_17588-RA	OAV93772.1/4.4e-83/hypothetical protein PTTG_06243 [Puccinia triticina 1-1 BBBD Race 1]	sp|Q08971|YP225_YEAST/3.7e-34/Protein PBDC1 homolog OS=Saccharomyces cerevisiae (strain ATCC 204508 / S288c) GN=YPL225W PE=1 SV=1
PH560_17593-RA	OAV86312.1/6.0e-16/hypothetical protein PTTG_05342 [Puccinia triticina 1-1 BBBD Race 1]	NA
PH560_17593-RB	OAV86312.1/1.1e-09/hypothetical protein PTTG_05342 [Puccinia triticina 1-1 BBBD Race 1]	NA
PH560_17578-RA	XP_003335614.1/1.5e-23/hypothetical protein PGTG_16386 [Puccinia graminis f. sp. tritici CRL 75-36-700-3]	NA
PH560_17578-RB	XP_003335614.1/7.3e-30/hypothetical protein PGTG_16386 [Puccinia graminis f. sp. tritici CRL 75-36-700-3]	NA
PH560_17578-RC	XP_003335614.1/2.8e-22/hypothetical protein PGTG_16386 [Puccinia graminis f. sp. tritici CRL 75-36-700-3]	NA
PH560_17590-RA	XP_003335614.1/7.7e-23/hypothetical protein PGTG_16386 [Puccinia graminis f. sp. tritici CRL 75-36-700-3]	NA
PH560_17590-RB	XP_003335614.1/8.1e-29/hypothetical protein PGTG_16386 [Puccinia graminis f. sp. tritici CRL 75-36-700-3]	NA
PH560_17590-RC	XP_003335614.1/2.8e-22/hypothetical protein PGTG_16386 [Puccinia graminis f. sp. tritici CRL 75-36-700-3]	NA
PH560_17591-RB	XP_003335614.1/1.3e-22/hypothetical protein PGTG_16386 [Puccinia graminis f. sp. tritici CRL 75-36-700-3]	NA
PH560_17591-RA	XP_003335614.1/1.1e-28/hypothetical protein PGTG_16386 [Puccinia graminis f. sp. tritici CRL 75-36-700-3]	NA
PH560_17591-RC	XP_003335614.1/2.8e-22/hypothetical protein PGTG_16386 [Puccinia graminis f. sp. tritici CRL 75-36-700-3]	NA
PH560_17594-RA	XP_003335614.1/2.0e-23/hypothetical protein PGTG_16386 [Puccinia graminis f. sp. tritici CRL 75-36-700-3]	NA
PH560_17594-RB	XP_003335614.1/2.8e-29/hypothetical protein PGTG_16386 [Puccinia graminis f. sp. tritici CRL 75-36-700-3]	NA
PH560_17594-RC	XP_003335614.1/7.4e-23/hypothetical protein PGTG_16386 [Puccinia graminis f. sp. tritici CRL 75-36-700-3]	NA
PH560_17584-RA	XP_003323580.1/1.2e-30/hypothetical protein PGTG_05482 [Puccinia graminis f. sp. tritici CRL 75-36-700-3]	NA
PH560_17583-RA	NA	NA
PH560_19646-RA	SCV72805.1/3.0e-241/BQ2448_4342 [Microbotryum intermedium]	sp|P0CT41|TF212_SCHPO/3.0e-116/Transposon Tf2-12 polyprotein OS=Schizosaccharomyces pombe (strain 972 / ATCC 24843) GN=Tf2-12 PE=3 SV=1
PH560_19641-RA	SCV72805.1/7.8e-209/BQ2448_4342 [Microbotryum intermedium]	sp|P0CT41|TF212_SCHPO/1.3e-99/Transposon Tf2-12 polyprotein OS=Schizosaccharomyces pombe (strain 972 / ATCC 24843) GN=Tf2-12 PE=3 SV=1
PH560_19648-RD	KNF05183.1/1.1e-179/hypothetical protein PSTG_01811 [Puccinia striiformis f. sp. tritici PST-78]	NA
PH560_19648-RC	KNF05183.1/7.0e-154/hypothetical protein PSTG_01811 [Puccinia striiformis f. sp. tritici PST-78]	NA
PH560_19648-RB	KNF05183.1/2.7e-147/hypothetical protein PSTG_01811 [Puccinia striiformis f. sp. tritici PST-78]	NA
PH560_19648-RA	KNF05183.1/6.2e-173/hypothetical protein PSTG_01811 [Puccinia striiformis f. sp. tritici PST-78]	NA
PH560_19645-RE	OAV89603.1/4.2e-72/hypothetical protein PTTG_05844 [Puccinia triticina 1-1 BBBD Race 1]	NA
PH560_19645-RD	OAV89603.1/1.2e-65/hypothetical protein PTTG_05844 [Puccinia triticina 1-1 BBBD Race 1]	NA
PH560_19645-RC	OAV89603.1/2.6e-56/hypothetical protein PTTG_05844 [Puccinia triticina 1-1 BBBD Race 1]	NA
PH560_19645-RA	OAV89603.1/2.8e-50/hypothetical protein PTTG_05844 [Puccinia triticina 1-1 BBBD Race 1]	NA
PH560_19645-RF	OAV89603.1/6.7e-33/hypothetical protein PTTG_05844 [Puccinia triticina 1-1 BBBD Race 1]	NA
PH560_19645-RB	OAV89603.1/1.3e-46/hypothetical protein PTTG_05844 [Puccinia triticina 1-1 BBBD Race 1]	NA
PH560_19642-RA	OAV89603.1/4.2e-72/hypothetical protein PTTG_05844 [Puccinia triticina 1-1 BBBD Race 1]	NA
PH560_19642-RB	OAV89603.1/1.2e-65/hypothetical protein PTTG_05844 [Puccinia triticina 1-1 BBBD Race 1]	NA
PH560_19642-RC	OAV89603.1/2.6e-56/hypothetical protein PTTG_05844 [Puccinia triticina 1-1 BBBD Race 1]	NA
PH560_19642-RF	OAV89603.1/2.8e-50/hypothetical protein PTTG_05844 [Puccinia triticina 1-1 BBBD Race 1]	NA
PH560_19642-RD	OAV89603.1/6.7e-33/hypothetical protein PTTG_05844 [Puccinia triticina 1-1 BBBD Race 1]	NA
PH560_19642-RE	OAV89603.1/1.3e-46/hypothetical protein PTTG_05844 [Puccinia triticina 1-1 BBBD Race 1]	NA
PH560_19647-RA	XP_003327651.2/9.7e-18/hypothetical protein PGTG_09185 [Puccinia graminis f. sp. tritici CRL 75-36-700-3]	NA
PH560_19649-RA	KNF05184.1/5.5e-23/hypothetical protein PSTG_01812 [Puccinia striiformis f. sp. tritici PST-78]	NA
PH560_19649-RC	KNF05184.1/2.6e-36/hypothetical protein PSTG_01812 [Puccinia striiformis f. sp. tritici PST-78]	NA
PH560_19649-RB	KNF05184.1/2.7e-14/hypothetical protein PSTG_01812 [Puccinia striiformis f. sp. tritici PST-78]	NA
PH560_19643-RA	KNZ51673.1/8.1e-24/uncharacterized protein VP01_386g17 [Puccinia sorghi]	NA
PH560_19644-RA	KNZ51673.1/8.1e-24/uncharacterized protein VP01_386g17 [Puccinia sorghi]	NA
PH560_19654-RA	XP_003338337.2/0.0e+00/hypothetical protein PGTG_19989 [Puccinia graminis f. sp. tritici CRL 75-36-700-3]	NA
PH560_19654-RB	XP_003338337.2/0.0e+00/hypothetical protein PGTG_19989 [Puccinia graminis f. sp. tritici CRL 75-36-700-3]	NA
PH560_19654-RC	XP_003338337.2/3.8e-74/hypothetical protein PGTG_19989 [Puccinia graminis f. sp. tritici CRL 75-36-700-3]	NA
PH560_19666-RC	KNF04192.1/5.7e-309/hypothetical protein PSTG_02544 [Puccinia striiformis f. sp. tritici PST-78]	NA
PH560_19666-RM	KNF04192.1/1.1e-237/hypothetical protein PSTG_02544 [Puccinia striiformis f. sp. tritici PST-78]	NA
PH560_19666-RB	KNF04192.1/4.1e-293/hypothetical protein PSTG_02544 [Puccinia striiformis f. sp. tritici PST-78]	NA
PH560_19666-RL	KNF04192.1/2.4e-258/hypothetical protein PSTG_02544 [Puccinia striiformis f. sp. tritici PST-78]	NA
PH560_19666-RJ	KNF04192.1/2.0e-241/hypothetical protein PSTG_02544 [Puccinia striiformis f. sp. tritici PST-78]	NA
PH560_19666-RK	KNF04192.1/2.7e-254/hypothetical protein PSTG_02544 [Puccinia striiformis f. sp. tritici PST-78]	NA
PH560_19666-RI	KNF04192.1/6.9e-239/hypothetical protein PSTG_02544 [Puccinia striiformis f. sp. tritici PST-78]	NA
PH560_19666-RH	KNF01522.1/3.9e-201/hypothetical protein PSTG_05302 [Puccinia striiformis f. sp. tritici PST-78]	NA
PH560_19666-RA	KNF04192.1/9.6e-144/hypothetical protein PSTG_02544 [Puccinia striiformis f. sp. tritici PST-78]	NA
PH560_19666-RG	KNF04192.1/2.5e-189/hypothetical protein PSTG_02544 [Puccinia striiformis f. sp. tritici PST-78]	NA
PH560_19666-RE	KNF01522.1/1.4e-186/hypothetical protein PSTG_05302 [Puccinia striiformis f. sp. tritici PST-78]	NA
PH560_19666-RF	KNF01522.1/1.1e-188/hypothetical protein PSTG_05302 [Puccinia striiformis f. sp. tritici PST-78]	NA
PH560_19666-RD	OAV93275.1/4.3e-111/hypothetical protein PTTG_27361 [Puccinia triticina 1-1 BBBD Race 1]	NA
PH560_19655-RI	OAV94317.1/4.7e-143/hypothetical protein PTTG_26989 [Puccinia triticina 1-1 BBBD Race 1]	NA
PH560_19655-RH	OAV94317.1/2.7e-132/hypothetical protein PTTG_26989 [Puccinia triticina 1-1 BBBD Race 1]	NA
PH560_19655-RG	OAV94317.1/4.8e-167/hypothetical protein PTTG_26989 [Puccinia triticina 1-1 BBBD Race 1]	NA
PH560_19655-RF	XP_003324154.2/1.0e-73/hypothetical protein PGTG_06056 [Puccinia graminis f. sp. tritici CRL 75-36-700-3]	NA
PH560_19655-RO	OAV87632.1/2.5e-81/hypothetical protein PTTG_29348 [Puccinia triticina 1-1 BBBD Race 1]	NA
PH560_19655-RP	OAV87632.1/2.0e-83/hypothetical protein PTTG_29348 [Puccinia triticina 1-1 BBBD Race 1]	NA
PH560_19655-RB	OAV94317.1/9.8e-114/hypothetical protein PTTG_26989 [Puccinia triticina 1-1 BBBD Race 1]	NA
PH560_19655-RD	OAV94317.1/3.2e-120/hypothetical protein PTTG_26989 [Puccinia triticina 1-1 BBBD Race 1]	NA
PH560_19655-RQ	OAV87632.1/1.8e-59/hypothetical protein PTTG_29348 [Puccinia triticina 1-1 BBBD Race 1]	NA
PH560_19655-RM	OAV97748.1/1.5e-97/hypothetical protein PTTG_01098 [Puccinia triticina 1-1 BBBD Race 1]	NA
PH560_19655-RE	OAV94317.1/4.7e-52/hypothetical protein PTTG_26989 [Puccinia triticina 1-1 BBBD Race 1]	NA
PH560_19655-RK	OAV85349.1/2.0e-62/hypothetical protein PTTG_30592, partial [Puccinia triticina 1-1 BBBD Race 1]	NA
PH560_19655-RL	OAV96704.1/6.6e-51/hypothetical protein PTTG_02913 [Puccinia triticina 1-1 BBBD Race 1]	NA
PH560_19655-RC	OAV86536.1/1.4e-82/hypothetical protein PTTG_29849 [Puccinia triticina 1-1 BBBD Race 1]	NA
PH560_19655-RA	OAV86536.1/3.4e-70/hypothetical protein PTTG_29849 [Puccinia triticina 1-1 BBBD Race 1]	NA
PH560_19655-RJ	OAV94317.1/3.6e-71/hypothetical protein PTTG_26989 [Puccinia triticina 1-1 BBBD Race 1]	NA
PH560_19655-RN	OAV97748.1/8.5e-54/hypothetical protein PTTG_01098 [Puccinia triticina 1-1 BBBD Race 1]	NA
PH560_19657-RE	XP_003335553.1/4.7e-165/hypothetical protein PGTG_16879 [Puccinia graminis f. sp. tritici CRL 75-36-700-3]	NA
PH560_19657-RC	XP_003335553.1/3.4e-151/hypothetical protein PGTG_16879 [Puccinia graminis f. sp. tritici CRL 75-36-700-3]	NA
PH560_19657-RD	XP_003335553.1/8.8e-141/hypothetical protein PGTG_16879 [Puccinia graminis f. sp. tritici CRL 75-36-700-3]	NA
PH560_19657-RB	XP_003335553.1/3.9e-124/hypothetical protein PGTG_16879 [Puccinia graminis f. sp. tritici CRL 75-36-700-3]	NA
PH560_19657-RA	XP_003335553.1/1.0e-101/hypothetical protein PGTG_16879 [Puccinia graminis f. sp. tritici CRL 75-36-700-3]	NA
PH560_19665-RB	OAV88751.1/7.9e-232/hypothetical protein PTTG_08363, partial [Puccinia triticina 1-1 BBBD Race 1]	sp|O13911|PNK1_SCHPO/8.3e-61/Bifunctional polynucleotide phosphatase/kinase OS=Schizosaccharomyces pombe (strain 972 / ATCC 24843) GN=pnk1 PE=1 SV=2
PH560_19665-RA	OAV88751.1/4.1e-219/hypothetical protein PTTG_08363, partial [Puccinia triticina 1-1 BBBD Race 1]	sp|O13911|PNK1_SCHPO/5.2e-62/Bifunctional polynucleotide phosphatase/kinase OS=Schizosaccharomyces pombe (strain 972 / ATCC 24843) GN=pnk1 PE=1 SV=2
PH560_19653-RA	KNF02954.1/1.3e-202/hypothetical protein PSTG_03903 [Puccinia striiformis f. sp. tritici PST-78]	NA
PH560_19662-RE	KNF02339.1/2.3e-100/hypothetical protein PSTG_04543 [Puccinia striiformis f. sp. tritici PST-78]	NA
PH560_19662-RA	KNE94873.1/1.8e-116/hypothetical protein PSTG_11777 [Puccinia striiformis f. sp. tritici PST-78]	NA
PH560_19662-RG	KNF02339.1/2.3e-100/hypothetical protein PSTG_04543 [Puccinia striiformis f. sp. tritici PST-78]	NA
PH560_19662-RD	KNF02339.1/1.2e-96/hypothetical protein PSTG_04543 [Puccinia striiformis f. sp. tritici PST-78]	NA
PH560_19662-RF	OAV91779.1/3.5e-90/hypothetical protein PTTG_27879 [Puccinia triticina 1-1 BBBD Race 1]	NA
PH560_19662-RI	KNF02339.1/1.9e-85/hypothetical protein PSTG_04543 [Puccinia striiformis f. sp. tritici PST-78]	NA
PH560_19662-RH	OAV91779.1/8.1e-97/hypothetical protein PTTG_27879 [Puccinia triticina 1-1 BBBD Race 1]	NA
PH560_19662-RB	XP_003325045.2/7.6e-108/hypothetical protein PGTG_06582 [Puccinia graminis f. sp. tritici CRL 75-36-700-3]	NA
PH560_19662-RJ	KNZ60034.1/1.3e-64/hypothetical protein VP01_1622g1, partial [Puccinia sorghi]	NA
PH560_19662-RC	NA	NA
PH560_19661-RA	OAV86427.1/3.3e-141/hypothetical protein PTTG_29913, partial [Puccinia triticina 1-1 BBBD Race 1]	NA
PH560_19661-RB	OAV86427.1/2.4e-127/hypothetical protein PTTG_29913, partial [Puccinia triticina 1-1 BBBD Race 1]	NA
PH560_19661-RC	OAV86427.1/1.1e-118/hypothetical protein PTTG_29913, partial [Puccinia triticina 1-1 BBBD Race 1]	NA
PH560_19661-RD	OAV86427.1/1.7e-93/hypothetical protein PTTG_29913, partial [Puccinia triticina 1-1 BBBD Race 1]	NA
PH560_19661-RE	OAV86427.1/1.5e-77/hypothetical protein PTTG_29913, partial [Puccinia triticina 1-1 BBBD Race 1]	NA
PH560_19661-RF	XP_003888514.1/1.6e-61/hypothetical protein PGTG_22720 [Puccinia graminis f. sp. tritici CRL 75-36-700-3]	NA
PH560_19656-RG	XP_003330750.2/3.4e-151/hypothetical protein PGTG_12287 [Puccinia graminis f. sp. tritici CRL 75-36-700-3]	NA
PH560_19656-RB	KNZ49274.1/6.1e-97/hypothetical protein VP01_510g11 [Puccinia sorghi]	NA
PH560_19656-RF	XP_003330750.2/2.5e-157/hypothetical protein PGTG_12287 [Puccinia graminis f. sp. tritici CRL 75-36-700-3]	NA
PH560_19656-RA	KNZ49760.1/1.1e-136/hypothetical protein VP01_4807g1, partial [Puccinia sorghi]	NA
PH560_19656-RD	XP_003330750.2/6.0e-115/hypothetical protein PGTG_12287 [Puccinia graminis f. sp. tritici CRL 75-36-700-3]	NA
PH560_19656-RE	XP_003330750.2/9.7e-71/hypothetical protein PGTG_12287 [Puccinia graminis f. sp. tritici CRL 75-36-700-3]	NA
PH560_19659-RA	OAV88749.1/6.9e-162/hypothetical protein PTTG_08365 [Puccinia triticina 1-1 BBBD Race 1]	NA
PH560_19659-RB	OAV88749.1/2.2e-166/hypothetical protein PTTG_08365 [Puccinia triticina 1-1 BBBD Race 1]	NA
PH560_19650-RA	KNE88595.1/1.3e-68/hypothetical protein PSTG_17987 [Puccinia striiformis f. sp. tritici PST-78]	NA
PH560_19663-RA	KNE92302.1/4.8e-33/hypothetical protein PSTG_14325 [Puccinia striiformis f. sp. tritici PST-78]	NA
PH560_19663-RB	KNE98542.1/1.3e-45/hypothetical protein PSTG_08281 [Puccinia striiformis f. sp. tritici PST-78]	NA
PH560_19669-RB	OAV90247.1/2.5e-66/hypothetical protein PTTG_04651 [Puccinia triticina 1-1 BBBD Race 1]	sp|Q7S8C2|MED21_NEUCR/4.4e-07/Mediator of RNA polymerase II transcription subunit 21 OS=Neurospora crassa (strain ATCC 24698 / 74-OR23-1A / CBS 708.71 / DSM 1257 / FGSC 987) GN=srb-7 PE=3 SV=1
PH560_19669-RC	OAV90247.1/6.9e-70/hypothetical protein PTTG_04651 [Puccinia triticina 1-1 BBBD Race 1]	sp|Q7S8C2|MED21_NEUCR/4.7e-07/Mediator of RNA polymerase II transcription subunit 21 OS=Neurospora crassa (strain ATCC 24698 / 74-OR23-1A / CBS 708.71 / DSM 1257 / FGSC 987) GN=srb-7 PE=3 SV=1
PH560_19669-RA	OAV90247.1/6.1e-54/hypothetical protein PTTG_04651 [Puccinia triticina 1-1 BBBD Race 1]	NA
PH560_19667-RA	KNF06548.1/7.4e-47/hypothetical protein PSTG_00423 [Puccinia striiformis f. sp. tritici PST-78]	NA
PH560_19668-RC	OAV89603.1/8.3e-55/hypothetical protein PTTG_05844 [Puccinia triticina 1-1 BBBD Race 1]	NA
PH560_19668-RB	OAV89603.1/6.9e-49/hypothetical protein PTTG_05844 [Puccinia triticina 1-1 BBBD Race 1]	NA
PH560_19668-RD	OAV89603.1/4.4e-32/hypothetical protein PTTG_05844 [Puccinia triticina 1-1 BBBD Race 1]	NA
PH560_19668-RA	OAV89603.1/1.3e-41/hypothetical protein PTTG_05844 [Puccinia triticina 1-1 BBBD Race 1]	NA
PH560_19652-RA	OAV89530.1/1.1e-20/hypothetical protein PTTG_28656 [Puccinia triticina 1-1 BBBD Race 1]	NA
PH560_19652-RB	OAV89530.1/2.9e-20/hypothetical protein PTTG_28656 [Puccinia triticina 1-1 BBBD Race 1]	NA
PH560_19658-RA	NA	NA
PH560_19660-RA	KNE86602.1/1.3e-07/hypothetical protein PSTG_20036, partial [Puccinia striiformis f. sp. tritici PST-78]	NA
PH560_19651-RA	XP_003329560.2/6.6e-16/hypothetical protein PGTG_11310 [Puccinia graminis f. sp. tritici CRL 75-36-700-3]	NA
PH560_19664-RA	XP_003329560.2/1.2e-14/hypothetical protein PGTG_11310 [Puccinia graminis f. sp. tritici CRL 75-36-700-3]	NA
PH560_08361-RF	XP_016269199.1/5.2e-233/retrotransposon polyprotein [Rhodotorula toruloides NP11]	sp|Q99315|YG31B_YEAST/4.7e-106/Transposon Ty3-G Gag-Pol polyprotein OS=Saccharomyces cerevisiae (strain ATCC 204508 / S288c) GN=TY3B-G PE=1 SV=3
PH560_08361-RH	XP_016269199.1/5.4e-221/retrotransposon polyprotein [Rhodotorula toruloides NP11]	sp|Q99315|YG31B_YEAST/7.3e-106/Transposon Ty3-G Gag-Pol polyprotein OS=Saccharomyces cerevisiae (strain ATCC 204508 / S288c) GN=TY3B-G PE=1 SV=3
PH560_08361-RB	OAV93414.1/2.7e-51/hypothetical protein PTTG_27339 [Puccinia triticina 1-1 BBBD Race 1]	NA
PH560_08361-RC	XP_016269199.1/1.9e-235/retrotransposon polyprotein [Rhodotorula toruloides NP11]	sp|Q99315|YG31B_YEAST/7.8e-106/Transposon Ty3-G Gag-Pol polyprotein OS=Saccharomyces cerevisiae (strain ATCC 204508 / S288c) GN=TY3B-G PE=1 SV=3
PH560_08361-RE	XP_016269199.1/1.2e-235/retrotransposon polyprotein [Rhodotorula toruloides NP11]	sp|Q99315|YG31B_YEAST/5.2e-106/Transposon Ty3-G Gag-Pol polyprotein OS=Saccharomyces cerevisiae (strain ATCC 204508 / S288c) GN=TY3B-G PE=1 SV=3
PH560_08361-RG	XP_016269199.1/2.8e-228/retrotransposon polyprotein [Rhodotorula toruloides NP11]	sp|Q99315|YG31B_YEAST/4.5e-106/Transposon Ty3-G Gag-Pol polyprotein OS=Saccharomyces cerevisiae (strain ATCC 204508 / S288c) GN=TY3B-G PE=1 SV=3
PH560_08361-RD	OAV87847.1/2.8e-42/hypothetical protein PTTG_29260 [Puccinia triticina 1-1 BBBD Race 1]	NA
PH560_08361-RA	NA	NA
PH560_08358-RA	OAV87414.1/0.0e+00/hypothetical protein PTTG_09491 [Puccinia triticina 1-1 BBBD Race 1]	sp|Q9C0W7|AP2A_SCHPO/7.0e-145/AP-2 complex subunit alpha OS=Schizosaccharomyces pombe (strain 972 / ATCC 24843) GN=apl3 PE=3 SV=1
PH560_08360-RB	KNE89415.1/7.1e-145/hypothetical protein PSTG_17131 [Puccinia striiformis f. sp. tritici PST-78]	NA
PH560_08360-RA	KNE89938.1/5.7e-98/hypothetical protein PSTG_16603, partial [Puccinia striiformis f. sp. tritici PST-78]	NA
PH560_08367-RA	KNZ59814.1/1.1e-113/uncharacterized protein VP01_1659g5 [Puccinia sorghi]	sp|Q12490|YB11B_YEAST/2.0e-16/Transposon Ty1-BL Gag-Pol polyprotein OS=Saccharomyces cerevisiae (strain ATCC 204508 / S288c) GN=TY1B-BL PE=1 SV=1
PH560_08364-RA	OAV88979.1/0.0e+00/hypothetical protein PTTG_08931 [Puccinia triticina 1-1 BBBD Race 1]	sp|Q04800|FRP1_SCHPO/1.2e-10/Ferric reductase transmembrane component 1 OS=Schizosaccharomyces pombe (strain 972 / ATCC 24843) GN=frp1 PE=1 SV=1
PH560_08363-RJ	OAV91779.1/3.4e-183/hypothetical protein PTTG_27879 [Puccinia triticina 1-1 BBBD Race 1]	NA
PH560_08363-RE	OAV98668.1/1.5e-115/hypothetical protein PTTG_25616 [Puccinia triticina 1-1 BBBD Race 1]	NA
PH560_08363-RO	KNE90709.1/7.6e-152/hypothetical protein PSTG_15860 [Puccinia striiformis f. sp. tritici PST-78]	NA
PH560_08363-RG	KNF02339.1/2.0e-113/hypothetical protein PSTG_04543 [Puccinia striiformis f. sp. tritici PST-78]	NA
PH560_08363-RN	KNE90709.1/5.4e-140/hypothetical protein PSTG_15860 [Puccinia striiformis f. sp. tritici PST-78]	NA
PH560_08363-RB	OAV98668.1/3.2e-125/hypothetical protein PTTG_25616 [Puccinia triticina 1-1 BBBD Race 1]	NA
PH560_08363-RD	KNE94873.1/8.2e-117/hypothetical protein PSTG_11777 [Puccinia striiformis f. sp. tritici PST-78]	NA
PH560_08363-RH	KNF02339.1/3.3e-99/hypothetical protein PSTG_04543 [Puccinia striiformis f. sp. tritici PST-78]	NA
PH560_08363-RI	OAV91779.1/7.8e-90/hypothetical protein PTTG_27879 [Puccinia triticina 1-1 BBBD Race 1]	NA
PH560_08363-RL	KNF02339.1/8.4e-86/hypothetical protein PSTG_04543 [Puccinia striiformis f. sp. tritici PST-78]	NA
PH560_08363-RK	OAV91779.1/5.2e-96/hypothetical protein PTTG_27879 [Puccinia triticina 1-1 BBBD Race 1]	NA
PH560_08363-RA	OAV98668.1/2.7e-105/hypothetical protein PTTG_25616 [Puccinia triticina 1-1 BBBD Race 1]	NA
PH560_08363-RM	OAV91779.1/9.8e-81/hypothetical protein PTTG_27879 [Puccinia triticina 1-1 BBBD Race 1]	NA
PH560_08363-RC	OAV98668.1/4.8e-78/hypothetical protein PTTG_25616 [Puccinia triticina 1-1 BBBD Race 1]	NA
PH560_08363-RP	KNE90709.1/4.4e-100/hypothetical protein PSTG_15860 [Puccinia striiformis f. sp. tritici PST-78]	NA
PH560_08363-RQ	KNE90709.1/2.7e-74/hypothetical protein PSTG_15860 [Puccinia striiformis f. sp. tritici PST-78]	NA
PH560_08363-RR	KNZ61252.1/7.5e-73/hypothetical protein VP01_142g12 [Puccinia sorghi]	NA
PH560_08363-RF	NA	NA
PH560_08354-RA	XP_003890300.1/1.6e-182/hypothetical protein PGTG_21039 [Puccinia graminis f. sp. tritici CRL 75-36-700-3]	NA
PH560_08355-RA	OAV94403.1/3.6e-268/hypothetical protein PTTG_02215 [Puccinia triticina 1-1 BBBD Race 1]	sp|Q09669|ADH4_SCHPO/4.0e-22/Alcohol dehydrogenase 4 OS=Schizosaccharomyces pombe (strain 972 / ATCC 24843) GN=adh4 PE=2 SV=1
PH560_08359-RA	XP_003337909.2/3.1e-159/hypothetical protein PGTG_19466 [Puccinia graminis f. sp. tritici CRL 75-36-700-3]	NA
PH560_08359-RB	XP_003337909.2/7.7e-106/hypothetical protein PGTG_19466 [Puccinia graminis f. sp. tritici CRL 75-36-700-3]	NA
PH560_08359-RC	XP_003337909.2/9.1e-89/hypothetical protein PGTG_19466 [Puccinia graminis f. sp. tritici CRL 75-36-700-3]	NA
PH560_08352-RB	KNF01362.1/2.2e-74/hypothetical protein PSTG_05462 [Puccinia striiformis f. sp. tritici PST-78]	NA
PH560_08352-RA	KNE96889.1/2.1e-27/hypothetical protein PSTG_09873 [Puccinia striiformis f. sp. tritici PST-78]	NA
PH560_08353-RA	OAV87086.1/3.5e-39/hypothetical protein PTTG_29583 [Puccinia triticina 1-1 BBBD Race 1]	NA
PH560_08353-RB	OAV87086.1/7.7e-39/hypothetical protein PTTG_29583 [Puccinia triticina 1-1 BBBD Race 1]	NA
PH560_08356-RA	OAV87413.1/1.3e-83/hypothetical protein PTTG_09490 [Puccinia triticina 1-1 BBBD Race 1]	NA
PH560_08351-RA	KNF03619.1/4.5e-48/hypothetical protein PSTG_03141 [Puccinia striiformis f. sp. tritici PST-78]	NA
PH560_08351-RC	KNE92727.1/9.4e-31/hypothetical protein PSTG_13857 [Puccinia striiformis f. sp. tritici PST-78]	NA
PH560_08351-RB	KNE92727.1/4.2e-46/hypothetical protein PSTG_13857 [Puccinia striiformis f. sp. tritici PST-78]	NA
PH560_08362-RC	XP_003888514.1/4.4e-42/hypothetical protein PGTG_22720 [Puccinia graminis f. sp. tritici CRL 75-36-700-3]	NA
PH560_08362-RD	XP_003888514.1/3.6e-61/hypothetical protein PGTG_22720 [Puccinia graminis f. sp. tritici CRL 75-36-700-3]	NA
PH560_08362-RA	OAV86427.1/4.9e-60/hypothetical protein PTTG_29913, partial [Puccinia triticina 1-1 BBBD Race 1]	NA
PH560_08362-RB	OAV86427.1/1.8e-46/hypothetical protein PTTG_29913, partial [Puccinia triticina 1-1 BBBD Race 1]	NA
PH560_08357-RA	XP_003890303.1/5.1e-31/hypothetical protein PGTG_21042 [Puccinia graminis f. sp. tritici CRL 75-36-700-3]	NA
PH560_08366-RA	OAV91834.1/8.6e-23/hypothetical protein PTTG_08134 [Puccinia triticina 1-1 BBBD Race 1]	NA
PH560_08350-RA	KNE96888.1/1.2e-17/hypothetical protein PSTG_09872 [Puccinia striiformis f. sp. tritici PST-78]	NA
PH560_08365-RA	NA	NA
PH560_08368-RB	XP_003322784.1/0.0e+00/hypothetical protein PGTG_04321 [Puccinia graminis f. sp. tritici CRL 75-36-700-3]	NA
PH560_08368-RA	OAV88982.1/1.2e-116/hypothetical protein PTTG_28849 [Puccinia triticina 1-1 BBBD Race 1]	NA
PH560_08368-RC	XP_003322784.1/0.0e+00/hypothetical protein PGTG_04321 [Puccinia graminis f. sp. tritici CRL 75-36-700-3]	NA
PH560_08370-RA	OAV87434.1/0.0e+00/hypothetical protein PTTG_02318 [Puccinia triticina 1-1 BBBD Race 1]	sp|O74945|RIA1_SCHPO/4.7e-230/Ribosome assembly protein 1 OS=Schizosaccharomyces pombe (strain 972 / ATCC 24843) GN=ria1 PE=3 SV=1
PH560_08370-RC	OAV87434.1/0.0e+00/hypothetical protein PTTG_02318 [Puccinia triticina 1-1 BBBD Race 1]	sp|O74945|RIA1_SCHPO/3.2e-245/Ribosome assembly protein 1 OS=Schizosaccharomyces pombe (strain 972 / ATCC 24843) GN=ria1 PE=3 SV=1
PH560_08370-RB	OAV87434.1/0.0e+00/hypothetical protein PTTG_02318 [Puccinia triticina 1-1 BBBD Race 1]	sp|O74945|RIA1_SCHPO/3.7e-238/Ribosome assembly protein 1 OS=Schizosaccharomyces pombe (strain 972 / ATCC 24843) GN=ria1 PE=3 SV=1
PH560_08369-RB	KNF04192.1/7.3e-202/hypothetical protein PSTG_02544 [Puccinia striiformis f. sp. tritici PST-78]	NA
PH560_08369-RC	KNF04192.1/1.9e-202/hypothetical protein PSTG_02544 [Puccinia striiformis f. sp. tritici PST-78]	NA
PH560_08369-RI	KNF01522.1/4.2e-173/hypothetical protein PSTG_05302 [Puccinia striiformis f. sp. tritici PST-78]	NA
PH560_08369-RH	KNF01522.1/2.1e-169/hypothetical protein PSTG_05302 [Puccinia striiformis f. sp. tritici PST-78]	NA
PH560_08369-RF	KNF01522.1/8.9e-168/hypothetical protein PSTG_05302 [Puccinia striiformis f. sp. tritici PST-78]	NA
PH560_08369-RK	KNF01522.1/4.0e-165/hypothetical protein PSTG_05302 [Puccinia striiformis f. sp. tritici PST-78]	NA
PH560_08369-RG	KNF01522.1/1.0e-185/hypothetical protein PSTG_05302 [Puccinia striiformis f. sp. tritici PST-78]	NA
PH560_08369-RL	KNF01522.1/2.0e-186/hypothetical protein PSTG_05302 [Puccinia striiformis f. sp. tritici PST-78]	NA
PH560_08369-RJ	KNF01522.1/4.9e-174/hypothetical protein PSTG_05302 [Puccinia striiformis f. sp. tritici PST-78]	NA
PH560_08369-RE	XP_003323137.2/3.3e-150/hypothetical protein PGTG_04674 [Puccinia graminis f. sp. tritici CRL 75-36-700-3]	NA
PH560_08369-RA	KNF04192.1/4.3e-118/hypothetical protein PSTG_02544 [Puccinia striiformis f. sp. tritici PST-78]	NA
PH560_08369-RD	XP_003323137.2/2.9e-140/hypothetical protein PGTG_04674 [Puccinia graminis f. sp. tritici CRL 75-36-700-3]	NA
PH560_08375-RB	OAV89003.1/8.3e-219/hypothetical protein PTTG_02320 [Puccinia triticina 1-1 BBBD Race 1]	sp|O14156|PP2C4_SCHPO/1.7e-43/Protein phosphatase 2C homolog 4 OS=Schizosaccharomyces pombe (strain 972 / ATCC 24843) GN=ptc4 PE=1 SV=2
PH560_08375-RA	OAV89003.1/1.5e-223/hypothetical protein PTTG_02320 [Puccinia triticina 1-1 BBBD Race 1]	sp|O14156|PP2C4_SCHPO/1.7e-43/Protein phosphatase 2C homolog 4 OS=Schizosaccharomyces pombe (strain 972 / ATCC 24843) GN=ptc4 PE=1 SV=2
PH560_08371-RB	KNE96180.1/6.5e-148/hypothetical protein PSTG_10595 [Puccinia striiformis f. sp. tritici PST-78]	NA
PH560_08371-RC	KNE96180.1/2.6e-149/hypothetical protein PSTG_10595 [Puccinia striiformis f. sp. tritici PST-78]	NA
PH560_08371-RE	KNE89024.1/9.2e-129/hypothetical protein PSTG_17519, partial [Puccinia striiformis f. sp. tritici PST-78]	NA
PH560_08371-RA	KNE96180.1/1.1e-75/hypothetical protein PSTG_10595 [Puccinia striiformis f. sp. tritici PST-78]	NA
PH560_08371-RD	KNE91263.1/4.7e-59/hypothetical protein PSTG_15328 [Puccinia striiformis f. sp. tritici PST-78]	NA
PH560_08372-RA	KNF00862.1/3.8e-74/hypothetical protein PSTG_05997 [Puccinia striiformis f. sp. tritici PST-78]	NA
PH560_08372-RB	KNF00862.1/5.8e-84/hypothetical protein PSTG_05997 [Puccinia striiformis f. sp. tritici PST-78]	NA
PH560_08372-RC	KNF00862.1/3.7e-71/hypothetical protein PSTG_05997 [Puccinia striiformis f. sp. tritici PST-78]	NA
PH560_08373-RB	KNE91264.1/3.3e-45/hypothetical protein PSTG_15329 [Puccinia striiformis f. sp. tritici PST-78]	NA
PH560_08373-RD	KNE91264.1/1.7e-78/hypothetical protein PSTG_15329 [Puccinia striiformis f. sp. tritici PST-78]	NA
PH560_08373-RC	KNE91264.1/1.1e-46/hypothetical protein PSTG_15329 [Puccinia striiformis f. sp. tritici PST-78]	NA
PH560_08373-RA	KNE91264.1/3.7e-45/hypothetical protein PSTG_15329 [Puccinia striiformis f. sp. tritici PST-78]	NA
PH560_08373-RG	KNE91264.1/5.1e-60/hypothetical protein PSTG_15329 [Puccinia striiformis f. sp. tritici PST-78]	NA
PH560_08373-RF	KNE91264.1/4.7e-32/hypothetical protein PSTG_15329 [Puccinia striiformis f. sp. tritici PST-78]	NA
PH560_08373-RE	KNE91264.1/7.0e-24/hypothetical protein PSTG_15329 [Puccinia striiformis f. sp. tritici PST-78]	NA
PH560_08374-RA	OAV87435.1/6.2e-89/actin like protein 2/3 complex, subunit 3 [Puccinia triticina 1-1 BBBD Race 1]	sp|Q9Y7J4|ARPC3_SCHPO/5.0e-43/Actin-related protein 2/3 complex subunit 3 OS=Schizosaccharomyces pombe (strain 972 / ATCC 24843) GN=arc3 PE=1 SV=1
PH560_08376-RA	KNZ57884.1/4.6e-70/uncharacterized protein VP01_204g9 [Puccinia sorghi]	NA
PH560_08377-RB	KNE96527.1/0.0e+00/hypothetical protein PSTG_10235 [Puccinia striiformis f. sp. tritici PST-78]	sp|P41003|SMC2_SCHPO/3.1e-262/Structural maintenance of chromosomes protein 2 OS=Schizosaccharomyces pombe (strain 972 / ATCC 24843) GN=cut14 PE=1 SV=2
PH560_08377-RA	OAV89002.1/8.5e-119/hypothetical protein PTTG_28853 [Puccinia triticina 1-1 BBBD Race 1]	sp|P41003|SMC2_SCHPO/7.1e-62/Structural maintenance of chromosomes protein 2 OS=Schizosaccharomyces pombe (strain 972 / ATCC 24843) GN=cut14 PE=1 SV=2
PH560_08377-RC	XP_003322797.2/9.9e-243/hypothetical protein PGTG_04334 [Puccinia graminis f. sp. tritici CRL 75-36-700-3]	sp|P41003|SMC2_SCHPO/2.9e-74/Structural maintenance of chromosomes protein 2 OS=Schizosaccharomyces pombe (strain 972 / ATCC 24843) GN=cut14 PE=1 SV=2
PH560_08386-RA	OAV88987.1/0.0e+00/hypothetical protein PTTG_02334 [Puccinia triticina 1-1 BBBD Race 1]	sp|O13773|UCP7_SCHPO/9.5e-25/UBA domain-containing protein 7 OS=Schizosaccharomyces pombe (strain 972 / ATCC 24843) GN=ucp7 PE=4 SV=1
PH560_08386-RB	OAV88987.1/0.0e+00/hypothetical protein PTTG_02334 [Puccinia triticina 1-1 BBBD Race 1]	sp|O13773|UCP7_SCHPO/9.4e-25/UBA domain-containing protein 7 OS=Schizosaccharomyces pombe (strain 972 / ATCC 24843) GN=ucp7 PE=4 SV=1
PH560_08383-RA	OAV88990.1/0.0e+00/hypothetical protein PTTG_02332 [Puccinia triticina 1-1 BBBD Race 1]	sp|O60176|YG41_SCHPO/3.8e-23/Uncharacterized RNA-binding protein C23E6.01c OS=Schizosaccharomyces pombe (strain 972 / ATCC 24843) GN=SPBC23E6.01c PE=1 SV=2
PH560_08383-RB	XP_003322791.1/0.0e+00/hypothetical protein PGTG_04328 [Puccinia graminis f. sp. tritici CRL 75-36-700-3]	sp|O60176|YG41_SCHPO/1.0e-21/Uncharacterized RNA-binding protein C23E6.01c OS=Schizosaccharomyces pombe (strain 972 / ATCC 24843) GN=SPBC23E6.01c PE=1 SV=2
PH560_08381-RA	KNE89452.1/3.8e-115/hypothetical protein PSTG_17093 [Puccinia striiformis f. sp. tritici PST-78]	NA
PH560_08385-RA	OAV88988.1/3.6e-269/hypothetical protein PTTG_02333 [Puccinia triticina 1-1 BBBD Race 1]	NA
PH560_08385-RB	XP_003322790.1/4.8e-277/hypothetical protein PGTG_04327 [Puccinia graminis f. sp. tritici CRL 75-36-700-3]	NA
PH560_08378-RB	OAV88999.1/7.1e-296/hypothetical protein PTTG_12024 [Puccinia triticina 1-1 BBBD Race 1]	sp|O60176|YG41_SCHPO/2.1e-18/Uncharacterized RNA-binding protein C23E6.01c OS=Schizosaccharomyces pombe (strain 972 / ATCC 24843) GN=SPBC23E6.01c PE=1 SV=2
PH560_08378-RA	OAV88999.1/1.1e-249/hypothetical protein PTTG_12024 [Puccinia triticina 1-1 BBBD Race 1]	sp|O60176|YG41_SCHPO/1.8e-18/Uncharacterized RNA-binding protein C23E6.01c OS=Schizosaccharomyces pombe (strain 972 / ATCC 24843) GN=SPBC23E6.01c PE=1 SV=2
PH560_08388-RB	XP_003322833.2/2.5e-209/hypothetical protein PGTG_04370 [Puccinia graminis f. sp. tritici CRL 75-36-700-3]	sp|P36605|HIS8_SCHPO/9.1e-84/Histidinol-phosphate aminotransferase OS=Schizosaccharomyces pombe (strain 972 / ATCC 24843) GN=his3 PE=3 SV=1
PH560_08388-RA	XP_003322833.2/1.5e-206/hypothetical protein PGTG_04370 [Puccinia graminis f. sp. tritici CRL 75-36-700-3]	sp|P36605|HIS8_SCHPO/6.9e-84/Histidinol-phosphate aminotransferase OS=Schizosaccharomyces pombe (strain 972 / ATCC 24843) GN=his3 PE=3 SV=1
PH560_08380-RB	OAV96177.1/1.4e-180/3'(2'),5'-bisphosphate nucleotidase [Puccinia triticina 1-1 BBBD Race 1]	sp|O94505|DPNP_SCHPO/3.9e-71/3'(2'),5'-bisphosphate nucleotidase OS=Schizosaccharomyces pombe (strain 972 / ATCC 24843) GN=tol1 PE=3 SV=1
PH560_08380-RA	OAV96177.1/2.5e-173/3'(2'),5'-bisphosphate nucleotidase [Puccinia triticina 1-1 BBBD Race 1]	sp|O94505|DPNP_SCHPO/3.5e-71/3'(2'),5'-bisphosphate nucleotidase OS=Schizosaccharomyces pombe (strain 972 / ATCC 24843) GN=tol1 PE=3 SV=1
PH560_08387-RA	OAV88986.1/1.1e-109/synaptobrevin like YKT6 [Puccinia triticina 1-1 BBBD Race 1]	sp|O60073|YKT6_SCHPO/8.2e-62/Synaptobrevin homolog ykt6 OS=Schizosaccharomyces pombe (strain 972 / ATCC 24843) GN=ykt6 PE=3 SV=1
PH560_08387-RB	OAV88986.1/6.5e-56/synaptobrevin like YKT6 [Puccinia triticina 1-1 BBBD Race 1]	sp|O60073|YKT6_SCHPO/8.0e-35/Synaptobrevin homolog ykt6 OS=Schizosaccharomyces pombe (strain 972 / ATCC 24843) GN=ykt6 PE=3 SV=1
PH560_08384-RA	XP_003325680.1/2.1e-65/hypothetical protein PGTG_06882 [Puccinia graminis f. sp. tritici CRL 75-36-700-3]	NA
PH560_08384-RB	XP_003325680.1/6.2e-71/hypothetical protein PGTG_06882 [Puccinia graminis f. sp. tritici CRL 75-36-700-3]	NA
PH560_08382-RA	XP_003329560.2/3.6e-14/hypothetical protein PGTG_11310 [Puccinia graminis f. sp. tritici CRL 75-36-700-3]	NA
PH560_08379-RA	XP_003338175.2/5.4e-07/hypothetical protein PGTG_19783 [Puccinia graminis f. sp. tritici CRL 75-36-700-3]	NA
PH560_08400-RB	OAV96018.1/0.0e+00/hypothetical protein PTTG_02307 [Puccinia triticina 1-1 BBBD Race 1]	NA
PH560_08400-RC	OAV96018.1/0.0e+00/hypothetical protein PTTG_02307 [Puccinia triticina 1-1 BBBD Race 1]	NA
PH560_08400-RA	OAV96018.1/0.0e+00/hypothetical protein PTTG_02307 [Puccinia triticina 1-1 BBBD Race 1]	NA
PH560_08399-RA	KNE96515.1/2.3e-169/hypothetical protein PSTG_10222 [Puccinia striiformis f. sp. tritici PST-78]	NA
PH560_08399-RC	KNE96515.1/2.2e-167/hypothetical protein PSTG_10222 [Puccinia striiformis f. sp. tritici PST-78]	NA
PH560_08399-RB	KNE96515.1/3.0e-167/hypothetical protein PSTG_10222 [Puccinia striiformis f. sp. tritici PST-78]	NA
PH560_08397-RA	XP_003322820.1/4.2e-283/hypothetical protein PGTG_04357 [Puccinia graminis f. sp. tritici CRL 75-36-700-3]	sp|O14011|PRP19_SCHPO/5.9e-40/Pre-mRNA-processing factor 19 OS=Schizosaccharomyces pombe (strain 972 / ATCC 24843) GN=prp19 PE=1 SV=1
PH560_08398-RA	OAV96021.1/1.8e-75/hypothetical protein PTTG_02306 [Puccinia triticina 1-1 BBBD Race 1]	NA
PH560_08389-RA	OAV96026.1/6.3e-134/hypothetical protein PTTG_02298 [Puccinia triticina 1-1 BBBD Race 1]	sp|P32642|GLRX4_YEAST/2.1e-41/Monothiol glutaredoxin-4 OS=Saccharomyces cerevisiae (strain ATCC 204508 / S288c) GN=GRX4 PE=1 SV=1
PH560_08389-RB	OAV96026.1/5.7e-61/hypothetical protein PTTG_02298 [Puccinia triticina 1-1 BBBD Race 1]	sp|O74790|GLRX4_SCHPO/1.5e-10/Monothiol glutaredoxin-4 OS=Schizosaccharomyces pombe (strain 972 / ATCC 24843) GN=grx4 PE=1 SV=1
PH560_08402-RA	OAV89940.1/4.1e-71/hypothetical protein PTTG_28489 [Puccinia triticina 1-1 BBBD Race 1]	NA
PH560_08402-RC	OAV89940.1/5.5e-53/hypothetical protein PTTG_28489 [Puccinia triticina 1-1 BBBD Race 1]	NA
PH560_08402-RB	OAV89940.1/5.3e-53/hypothetical protein PTTG_28489 [Puccinia triticina 1-1 BBBD Race 1]	NA
PH560_08393-RA	XP_003322829.1/1.5e-111/hypothetical protein PGTG_04366 [Puccinia graminis f. sp. tritici CRL 75-36-700-3]	sp|Q00614|CACP_CANTR/1.8e-40/Carnitine O-acetyltransferase, mitochondrial OS=Candida tropicalis GN=CAT2 PE=3 SV=1
PH560_08403-RA	NA	NA
PH560_08403-RB	KNF00894.1/3.1e-14/hypothetical protein PSTG_05786 [Puccinia striiformis f. sp. tritici PST-78]	NA
PH560_08394-RB	OAV96023.1/1.0e-90/hypothetical protein PTTG_02303 [Puccinia triticina 1-1 BBBD Race 1]	sp|Q00614|CACP_CANTR/2.1e-24/Carnitine O-acetyltransferase, mitochondrial OS=Candida tropicalis GN=CAT2 PE=3 SV=1
PH560_08394-RA	OAV96023.1/2.1e-15/hypothetical protein PTTG_02303 [Puccinia triticina 1-1 BBBD Race 1]	NA
PH560_08390-RA	XP_003322829.1/3.0e-76/hypothetical protein PGTG_04366 [Puccinia graminis f. sp. tritici CRL 75-36-700-3]	sp|Q00614|CACP_CANTR/3.4e-16/Carnitine O-acetyltransferase, mitochondrial OS=Candida tropicalis GN=CAT2 PE=3 SV=1
PH560_08396-RA	OAV96023.1/9.2e-64/hypothetical protein PTTG_02303 [Puccinia triticina 1-1 BBBD Race 1]	sp|Q00614|CACP_CANTR/1.2e-12/Carnitine O-acetyltransferase, mitochondrial OS=Candida tropicalis GN=CAT2 PE=3 SV=1
PH560_08404-RA	OAV99722.1/1.9e-53/hypothetical protein PTTG_25271 [Puccinia triticina 1-1 BBBD Race 1]	NA
PH560_08404-RC	OAV99722.1/1.1e-53/hypothetical protein PTTG_25271 [Puccinia triticina 1-1 BBBD Race 1]	NA
PH560_08404-RB	OAV99722.1/1.2e-34/hypothetical protein PTTG_25271 [Puccinia triticina 1-1 BBBD Race 1]	NA
PH560_08391-RA	OAV96024.1/8.9e-46/hypothetical protein PTTG_02302 [Puccinia triticina 1-1 BBBD Race 1]	NA
PH560_08395-RA	OAV96023.1/9.4e-40/hypothetical protein PTTG_02303 [Puccinia triticina 1-1 BBBD Race 1]	NA
PH560_08392-RA	NA	NA
PH560_08401-RA	OAV94499.1/2.1e-11/hypothetical protein PTTG_03031 [Puccinia triticina 1-1 BBBD Race 1]	NA
PH560_08410-RA	OAV96034.1/0.0e+00/hypothetical protein PTTG_02292 [Puccinia triticina 1-1 BBBD Race 1]	sp|O59722|FAB1_SCHPO/1.9e-75/1-phosphatidylinositol 3-phosphate 5-kinase fab1 OS=Schizosaccharomyces pombe (strain 972 / ATCC 24843) GN=fab1 PE=3 SV=2
PH560_08410-RB	OAV96034.1/0.0e+00/hypothetical protein PTTG_02292 [Puccinia triticina 1-1 BBBD Race 1]	sp|O59722|FAB1_SCHPO/1.9e-75/1-phosphatidylinositol 3-phosphate 5-kinase fab1 OS=Schizosaccharomyces pombe (strain 972 / ATCC 24843) GN=fab1 PE=3 SV=2
PH560_08410-RC	OAV96034.1/0.0e+00/hypothetical protein PTTG_02292 [Puccinia triticina 1-1 BBBD Race 1]	sp|O59722|FAB1_SCHPO/1.9e-75/1-phosphatidylinositol 3-phosphate 5-kinase fab1 OS=Schizosaccharomyces pombe (strain 972 / ATCC 24843) GN=fab1 PE=3 SV=2
PH560_08406-RB	OAV87782.1/0.0e+00/hypothetical protein PTTG_11925 [Puccinia triticina 1-1 BBBD Race 1]	NA
PH560_08406-RA	OAV87782.1/0.0e+00/hypothetical protein PTTG_11925 [Puccinia triticina 1-1 BBBD Race 1]	NA
PH560_08406-RC	OAV87782.1/0.0e+00/hypothetical protein PTTG_11925 [Puccinia triticina 1-1 BBBD Race 1]	NA
PH560_08406-RD	OAV87782.1/0.0e+00/hypothetical protein PTTG_11925 [Puccinia triticina 1-1 BBBD Race 1]	NA
PH560_08406-RE	OAV87782.1/3.9e-122/hypothetical protein PTTG_11925 [Puccinia triticina 1-1 BBBD Race 1]	NA
PH560_08406-RF	OAV87782.1/1.8e-113/hypothetical protein PTTG_11925 [Puccinia triticina 1-1 BBBD Race 1]	NA
PH560_08416-RA	KNZ54418.1/2.3e-152/uncharacterized protein VP01_2954g5 [Puccinia sorghi]	sp|Q99337|YN12B_YEAST/1.3e-27/Transposon Ty1-NL2 Gag-Pol polyprotein OS=Saccharomyces cerevisiae (strain ATCC 204508 / S288c) GN=TY1B-NL2 PE=3 SV=1
PH560_08416-RB	KNE93182.1/2.4e-143/hypothetical protein PSTG_13434 [Puccinia striiformis f. sp. tritici PST-78]	sp|Q99337|YN12B_YEAST/1.3e-27/Transposon Ty1-NL2 Gag-Pol polyprotein OS=Saccharomyces cerevisiae (strain ATCC 204508 / S288c) GN=TY1B-NL2 PE=3 SV=1
PH560_08416-RC	KNE93182.1/1.2e-142/hypothetical protein PSTG_13434 [Puccinia striiformis f. sp. tritici PST-78]	sp|Q99337|YN12B_YEAST/1.2e-27/Transposon Ty1-NL2 Gag-Pol polyprotein OS=Saccharomyces cerevisiae (strain ATCC 204508 / S288c) GN=TY1B-NL2 PE=3 SV=1
PH560_08416-RD	KNE93182.1/1.4e-140/hypothetical protein PSTG_13434 [Puccinia striiformis f. sp. tritici PST-78]	sp|Q99337|YN12B_YEAST/1.2e-27/Transposon Ty1-NL2 Gag-Pol polyprotein OS=Saccharomyces cerevisiae (strain ATCC 204508 / S288c) GN=TY1B-NL2 PE=3 SV=1
PH560_08416-RE	KNE93182.1/2.0e-139/hypothetical protein PSTG_13434 [Puccinia striiformis f. sp. tritici PST-78]	sp|Q99337|YN12B_YEAST/1.2e-27/Transposon Ty1-NL2 Gag-Pol polyprotein OS=Saccharomyces cerevisiae (strain ATCC 204508 / S288c) GN=TY1B-NL2 PE=3 SV=1
PH560_08426-RC	OAV96055.1/0.0e+00/hypothetical protein PTTG_02272 [Puccinia triticina 1-1 BBBD Race 1]	sp|O14251|TR120_SCHPO/9.3e-17/Transport protein particle subunit trs120 OS=Schizosaccharomyces pombe (strain 972 / ATCC 24843) GN=trs120 PE=3 SV=1
PH560_08426-RB	XP_003322860.2/0.0e+00/hypothetical protein PGTG_04397 [Puccinia graminis f. sp. tritici CRL 75-36-700-3]	sp|O14251|TR120_SCHPO/8.7e-16/Transport protein particle subunit trs120 OS=Schizosaccharomyces pombe (strain 972 / ATCC 24843) GN=trs120 PE=3 SV=1
PH560_08426-RD	OAV96055.1/0.0e+00/hypothetical protein PTTG_02272 [Puccinia triticina 1-1 BBBD Race 1]	sp|O14251|TR120_SCHPO/8.2e-16/Transport protein particle subunit trs120 OS=Schizosaccharomyces pombe (strain 972 / ATCC 24843) GN=trs120 PE=3 SV=1
PH560_08426-RA	XP_003322860.2/0.0e+00/hypothetical protein PGTG_04397 [Puccinia graminis f. sp. tritici CRL 75-36-700-3]	sp|O14251|TR120_SCHPO/7.0e-16/Transport protein particle subunit trs120 OS=Schizosaccharomyces pombe (strain 972 / ATCC 24843) GN=trs120 PE=3 SV=1
PH560_08417-RB	XP_003322852.2/0.0e+00/hypothetical protein PGTG_04389 [Puccinia graminis f. sp. tritici CRL 75-36-700-3]	NA
PH560_08417-RA	XP_003322852.2/0.0e+00/hypothetical protein PGTG_04389 [Puccinia graminis f. sp. tritici CRL 75-36-700-3]	NA
PH560_08417-RC	XP_003322852.2/2.9e-206/hypothetical protein PGTG_04389 [Puccinia graminis f. sp. tritici CRL 75-36-700-3]	NA
PH560_08421-RA	XP_003333485.1/2.7e-185/hypothetical protein PGTG_14907 [Puccinia graminis f. sp. tritici CRL 75-36-700-3]	NA
PH560_08421-RB	XP_003333485.1/4.0e-86/hypothetical protein PGTG_14907 [Puccinia graminis f. sp. tritici CRL 75-36-700-3]	NA
PH560_08407-RA	OAV96030.1/0.0e+00/fimbrin [Puccinia triticina 1-1 BBBD Race 1]	sp|P32599|FIMB_YEAST/1.5e-220/Fimbrin OS=Saccharomyces cerevisiae (strain ATCC 204508 / S288c) GN=SAC6 PE=1 SV=1
PH560_08418-RA	OAV88722.1/1.2e-103/hypothetical protein PTTG_28938 [Puccinia triticina 1-1 BBBD Race 1]	NA
PH560_08418-RB	OAV88722.1/1.3e-33/hypothetical protein PTTG_28938 [Puccinia triticina 1-1 BBBD Race 1]	NA
PH560_08409-RA	OAV96033.1/1.1e-245/hypothetical protein PTTG_02293 [Puccinia triticina 1-1 BBBD Race 1]	sp|Q96V64|EXG_BLUGR/7.0e-85/Glucan 1,3-beta-glucosidase OS=Blumeria graminis PE=3 SV=1
PH560_08409-RB	OAV96033.1/7.4e-244/hypothetical protein PTTG_02293 [Puccinia triticina 1-1 BBBD Race 1]	sp|Q96V64|EXG_BLUGR/7.3e-87/Glucan 1,3-beta-glucosidase OS=Blumeria graminis PE=3 SV=1
PH560_08408-RB	OAV96031.1/6.4e-213/hypothetical protein PTTG_02294 [Puccinia triticina 1-1 BBBD Race 1]	sp|O59718|NEM1_SCHPO/2.3e-42/Nuclear envelope morphology protein 1 OS=Schizosaccharomyces pombe (strain 972 / ATCC 24843) GN=nem1 PE=3 SV=1
PH560_08408-RA	OAV96031.1/1.9e-140/hypothetical protein PTTG_02294 [Puccinia triticina 1-1 BBBD Race 1]	sp|P38757|NEM1_YEAST/2.6e-06/Nuclear envelope morphology protein 1 OS=Saccharomyces cerevisiae (strain ATCC 204508 / S288c) GN=NEM1 PE=1 SV=1
PH560_08413-RA	OAV96037.1/1.1e-222/hypothetical protein PTTG_02289 [Puccinia triticina 1-1 BBBD Race 1]	sp|P0CM34|ATG3_CRYNJ/3.7e-95/Autophagy-related protein 3 OS=Cryptococcus neoformans var. neoformans serotype D (strain JEC21 / ATCC MYA-565) GN=ATG3 PE=3 SV=1
PH560_08413-RB	OAV96037.1/2.2e-124/hypothetical protein PTTG_02289 [Puccinia triticina 1-1 BBBD Race 1]	sp|P0CM34|ATG3_CRYNJ/4.4e-45/Autophagy-related protein 3 OS=Cryptococcus neoformans var. neoformans serotype D (strain JEC21 / ATCC MYA-565) GN=ATG3 PE=3 SV=1
PH560_08412-RA	OAV96036.1/7.1e-195/hypothetical protein PTTG_02290 [Puccinia triticina 1-1 BBBD Race 1]	NA
PH560_08425-RD	KNZ60175.1/2.7e-71/uncharacterized protein VP01_15g9 [Puccinia sorghi]	NA
PH560_08425-RC	KNZ60175.1/8.4e-67/uncharacterized protein VP01_15g9 [Puccinia sorghi]	NA
PH560_08425-RB	KNZ60175.1/3.8e-63/uncharacterized protein VP01_15g9 [Puccinia sorghi]	NA
PH560_08425-RA	KNZ46012.1/2.9e-59/hypothetical protein VP01_7627g1, partial [Puccinia sorghi]	NA
PH560_08422-RA	OAV96059.1/3.9e-163/hypothetical protein PTTG_02270 [Puccinia triticina 1-1 BBBD Race 1]	NA
PH560_08422-RB	NA	NA
PH560_08405-RA	OAV96016.1/4.0e-145/hypothetical protein PTTG_02309 [Puccinia triticina 1-1 BBBD Race 1]	NA
PH560_08420-RC	XP_003328763.2/1.1e-58/hypothetical protein PGTG_10064 [Puccinia graminis f. sp. tritici CRL 75-36-700-3]	NA
PH560_08420-RB	XP_003337818.1/1.9e-24/hypothetical protein PGTG_19417 [Puccinia graminis f. sp. tritici CRL 75-36-700-3]	NA
PH560_08420-RA	NA	NA
PH560_08424-RA	OAV96057.1/7.6e-92/hypothetical protein PTTG_02271 [Puccinia triticina 1-1 BBBD Race 1]	sp|P29251|FOL1_PNECA/7.1e-10/Folic acid synthesis protein fol1 OS=Pneumocystis carinii GN=fol1 PE=1 SV=1
PH560_08414-RC	OAV96039.1/8.5e-109/hypothetical protein PTTG_02287 [Puccinia triticina 1-1 BBBD Race 1]	NA
PH560_08414-RB	OAV96039.1/1.3e-100/hypothetical protein PTTG_02287 [Puccinia triticina 1-1 BBBD Race 1]	NA
PH560_08414-RA	OAV96039.1/1.3e-76/hypothetical protein PTTG_02287 [Puccinia triticina 1-1 BBBD Race 1]	NA
PH560_08411-RB	OAV96035.1/3.9e-113/hypothetical protein PTTG_02291 [Puccinia triticina 1-1 BBBD Race 1]	NA
PH560_08411-RA	OAV96035.1/1.0e-71/hypothetical protein PTTG_02291 [Puccinia triticina 1-1 BBBD Race 1]	NA
PH560_08423-RA	OAV96219.1/9.7e-70/hypothetical protein PTTG_05315 [Puccinia triticina 1-1 BBBD Race 1]	sp|O14348|NC2B_SCHPO/8.1e-29/Negative cofactor 2 complex subunit beta OS=Schizosaccharomyces pombe (strain 972 / ATCC 24843) GN=ncb2 PE=3 SV=1
PH560_08427-RA	OAV94088.1/1.3e-15/hypothetical protein PTTG_02896 [Puccinia triticina 1-1 BBBD Race 1]	NA
PH560_08427-RB	NA	NA
PH560_08415-RA	KNZ57884.1/1.2e-25/uncharacterized protein VP01_204g9 [Puccinia sorghi]	NA
PH560_08419-RA	KNE87523.1/1.0e-11/hypothetical protein PSTG_19092, partial [Puccinia striiformis f. sp. tritici PST-78]	NA
PH560_23765-RA	OAV87019.1/8.3e-208/hypothetical protein PTTG_29615 [Puccinia triticina 1-1 BBBD Race 1]	NA
PH560_23765-RE	OAV87084.1/2.5e-157/hypothetical protein PTTG_29581 [Puccinia triticina 1-1 BBBD Race 1]	NA
PH560_23765-RG	OAV87084.1/9.6e-168/hypothetical protein PTTG_29581 [Puccinia triticina 1-1 BBBD Race 1]	NA
PH560_23765-RH	OAV87084.1/1.5e-151/hypothetical protein PTTG_29581 [Puccinia triticina 1-1 BBBD Race 1]	NA
PH560_23765-RF	OAV87084.1/1.7e-142/hypothetical protein PTTG_29581 [Puccinia triticina 1-1 BBBD Race 1]	NA
PH560_23765-RD	XP_003325780.2/4.0e-126/hypothetical protein PGTG_06982 [Puccinia graminis f. sp. tritici CRL 75-36-700-3]	NA
PH560_23765-RC	XP_003325780.2/9.6e-89/hypothetical protein PGTG_06982 [Puccinia graminis f. sp. tritici CRL 75-36-700-3]	NA
PH560_23765-RB	OAV87084.1/1.6e-43/hypothetical protein PTTG_29581 [Puccinia triticina 1-1 BBBD Race 1]	NA
PH560_23763-RA	OAV87083.1/4.8e-140/hypothetical protein PTTG_29580 [Puccinia triticina 1-1 BBBD Race 1]	NA
PH560_23766-RA	XP_003889256.1/5.7e-70/hypothetical protein PGTG_22034 [Puccinia graminis f. sp. tritici CRL 75-36-700-3]	sp|Q2HEW5|CHG2_CHAGB/7.2e-09/PKS-NRPS hybrid synthetase CHGG_01239 OS=Chaetomium globosum (strain ATCC 6205 / CBS 148.51 / DSM 1962 / NBRC 6347 / NRRL 1970) GN=CHGG_01239 PE=3 SV=1
PH560_23768-RB	XP_003338159.2/5.3e-35/hypothetical protein PGTG_19724 [Puccinia graminis f. sp. tritici CRL 75-36-700-3]	NA
PH560_23768-RA	KNE89437.1/9.8e-23/hypothetical protein PSTG_17111 [Puccinia striiformis f. sp. tritici PST-78]	NA
PH560_23764-RA	OAV87084.1/2.3e-58/hypothetical protein PTTG_29581 [Puccinia triticina 1-1 BBBD Race 1]	NA
PH560_23767-RA	KNF05059.1/3.1e-12/hypothetical protein PSTG_01690 [Puccinia striiformis f. sp. tritici PST-78]	NA
PH560_15135-RA	OAV99058.1/1.6e-208/hypothetical protein PTTG_02404 [Puccinia triticina 1-1 BBBD Race 1]	sp|P53584|YTP1_YEAST/6.5e-53/Protein YTP1 OS=Saccharomyces cerevisiae (strain ATCC 204508 / S288c) GN=YTP1 PE=1 SV=1
PH560_15135-RB	NA	NA
PH560_15134-RA	KNE91264.1/4.5e-59/hypothetical protein PSTG_15329 [Puccinia striiformis f. sp. tritici PST-78]	NA
PH560_15134-RB	KNE91264.1/1.3e-32/hypothetical protein PSTG_15329 [Puccinia striiformis f. sp. tritici PST-78]	NA
PH560_15134-RC	KNE91264.1/1.3e-23/hypothetical protein PSTG_15329 [Puccinia striiformis f. sp. tritici PST-78]	NA
PH560_15131-RA	KNF00862.1/5.9e-60/hypothetical protein PSTG_05997 [Puccinia striiformis f. sp. tritici PST-78]	NA
PH560_15131-RB	KNF00862.1/5.1e-41/hypothetical protein PSTG_05997 [Puccinia striiformis f. sp. tritici PST-78]	NA
PH560_15133-RA	KNE91264.1/9.3e-41/hypothetical protein PSTG_15329 [Puccinia striiformis f. sp. tritici PST-78]	NA
PH560_15132-RA	KNZ46047.1/2.2e-28/hypothetical protein VP01_7605g1 [Puccinia sorghi]	NA
PH560_15132-RC	KNZ46047.1/1.4e-30/hypothetical protein VP01_7605g1 [Puccinia sorghi]	NA
PH560_15132-RB	KNZ46047.1/3.4e-30/hypothetical protein VP01_7605g1 [Puccinia sorghi]	NA
PH560_15139-RA	OAV87669.1/1.8e-215/AGC/DMPK/GEK protein kinase [Puccinia triticina 1-1 BBBD Race 1]	sp|Q5AP53|CBK1_CANAL/7.4e-12/Serine/threonine-protein kinase CBK1 OS=Candida albicans (strain SC5314 / ATCC MYA-2876) GN=CBK1 PE=1 SV=2
[truncated: 64,127 more rows]

## Sheet: S3. Secreted protein genes
Genes	Protein Isoform	Predicted signal peptide	Topology of predicted transmembrane helices (The topology is given as the position of the transmembrane helices separated by 'i' if the loop is on the inside or 'o' if it is on the outside.)
PH560_00022	PH560_00022-RA	27	o192-214i221-243o269-291i304-326o
PH560_00031	PH560_00031-RA	33	o
PH560_00034	PH560_00034-RA	23	o
PH560_00034	PH560_00034-RB	23	o
PH560_00034	PH560_00034-RC	23	o
PH560_00053	PH560_00053-RB	27	i13-30o
PH560_00053	PH560_00053-RC	27	i13-30o
PH560_00054	PH560_00054-RB	20	o
PH560_00054	PH560_00054-RC	20	o
PH560_00054	PH560_00054-RD	20	o
PH560_00066	PH560_00066-RB	18	o
PH560_00084	PH560_00084-RA	26	o
PH560_00085	PH560_00085-RB	20	i2-24o62-84i
PH560_00086	PH560_00086-RA	20	i2-24o57-79i
PH560_00086	PH560_00086-RB	20	i3-25o40-62i67-89o
PH560_00094	PH560_00094-RB	22	i169-191o201-223i
PH560_00102	PH560_00102-RA	23	o
PH560_00117	PH560_00117-RA	24	o
PH560_00117	PH560_00117-RB	17	o
PH560_00138	PH560_00138-RA	21	o5-24i
PH560_00138	PH560_00138-RB	21	o5-24i
PH560_00148	PH560_00148-RA	17	o
PH560_00148	PH560_00148-RB	28	o
PH560_00148	PH560_00148-RC	28	o
PH560_00148	PH560_00148-RD	24	o
PH560_00151	PH560_00151-RA	30	i12-34o
PH560_00155	PH560_00155-RA	21	o
PH560_00155	PH560_00155-RB	21	o
PH560_00162	PH560_00162-RA	37	i17-39o68-90i135-152o
PH560_00162	PH560_00162-RB	37	i17-39o68-90i135-152o
PH560_00162	PH560_00162-RC	37	i17-39o68-90i135-152o
PH560_00168	PH560_00168-RD	17	o4-26i
PH560_00200	PH560_00200-RB	24	o
PH560_00235	PH560_00235-RI	20	o
PH560_00239	PH560_00239-RA	19	o
PH560_00239	PH560_00239-RC	19	o
PH560_00266	PH560_00266-RA	24	i459-481o
PH560_00266	PH560_00266-RB	20	o455-477i
PH560_00276	PH560_00276-RA	25	i5-27o
PH560_00281	PH560_00281-RA	22	o
PH560_00299	PH560_00299-RA	46	o20-39i52-74o94-116i129-151o
PH560_00306	PH560_00306-RA	21	o4-21i
PH560_00306	PH560_00306-RB	21	o4-21i
PH560_00306	PH560_00306-RC	21	o4-21i
PH560_00355	PH560_00355-RA	36	o15-37i
PH560_00363	PH560_00363-RB	17	o
PH560_00363	PH560_00363-RC	32	o
PH560_00379	PH560_00379-RA	30	o
PH560_00385	PH560_00385-RA	22	o
PH560_00397	PH560_00397-RA	21	o
PH560_00397	PH560_00397-RB	21	o
PH560_00414	PH560_00414-RB	24	o
PH560_00414	PH560_00414-RC	24	o
PH560_00418	PH560_00418-RA	22	o
PH560_00431	PH560_00431-RA	18	o
PH560_00432	PH560_00432-RB	21	o
PH560_00473	PH560_00473-RA	26	o4-26i
PH560_00473	PH560_00473-RB	26	o4-26i162-184o
PH560_00473	PH560_00473-RC	26	o4-26i159-181o
PH560_00481	PH560_00481-RA	21	o486-508i
PH560_00486	PH560_00486-RA	22	o
PH560_00486	PH560_00486-RB	22	o
PH560_00486	PH560_00486-RC	22	o
PH560_00490	PH560_00490-RA	21	o
PH560_00490	PH560_00490-RB	21	o
PH560_00490	PH560_00490-RC	21	o
PH560_00490	PH560_00490-RE	21	o
PH560_00490	PH560_00490-RF	21	o
PH560_00492	PH560_00492-RA	23	o
PH560_00492	PH560_00492-RB	23	o543-565i
PH560_00507	PH560_00507-RA	19	o
PH560_00507	PH560_00507-RB	19	o
PH560_00524	PH560_00524-RA	20	o
PH560_00526	PH560_00526-RH	17	o
PH560_00538	PH560_00538-RA	24	o
PH560_00558	PH560_00558-RA	19	o
PH560_00558	PH560_00558-RB	19	o
PH560_00560	PH560_00560-RA	34	i489-511o
PH560_00560	PH560_00560-RB	34	i459-481o
PH560_00560	PH560_00560-RC	34	i13-31o
PH560_00562	PH560_00562-RA	21	o
PH560_00562	PH560_00562-RD	21	o
PH560_00562	PH560_00562-RE	21	o
PH560_00574	PH560_00574-RA	22	o
PH560_00574	PH560_00574-RB	22	o
PH560_00574	PH560_00574-RC	22	o
PH560_00587	PH560_00587-RC	16	o
PH560_00587	PH560_00587-RF	16	o
PH560_00656	PH560_00656-RA	30	o
PH560_00656	PH560_00656-RB	30	o
PH560_00656	PH560_00656-RC	30	o
PH560_00667	PH560_00667-RB	24	o
PH560_00667	PH560_00667-RC	24	o
PH560_00669	PH560_00669-RA	30	i13-30o
PH560_00689	PH560_00689-RF	28	o
PH560_00781	PH560_00781-RA	20	i3-25o
PH560_00787	PH560_00787-RE	25	o
PH560_00806	PH560_00806-RA	32	o153-175i352-370o
PH560_00836	PH560_00836-RA	19	o
PH560_00836	PH560_00836-RB	19	o
PH560_00836	PH560_00836-RC	19	o
PH560_00836	PH560_00836-RD	19	o
PH560_00836	PH560_00836-RG	19	o
PH560_00836	PH560_00836-RH	19	o
PH560_00836	PH560_00836-RI	19	o
PH560_00838	PH560_00838-RD	19	o
PH560_00838	PH560_00838-RE	19	o
PH560_00838	PH560_00838-RH	19	o
PH560_00840	PH560_00840-RA	31	i17-34o
PH560_00848	PH560_00848-RB	25	o
PH560_00867	PH560_00867-RF	18	o
PH560_00869	PH560_00869-RB	31	i11-33o1065-1087i1294-1316o
PH560_00869	PH560_00869-RC	31	i11-33o1091-1113i1320-1342o
PH560_00869	PH560_00869-RD	31	i11-33o1082-1104i1311-1333o
PH560_00872	PH560_00872-RA	24	o
PH560_00873	PH560_00873-RA	23	o
PH560_00884	PH560_00884-RA	17	o
PH560_00884	PH560_00884-RB	17	o218-240i
PH560_00885	PH560_00885-RA	22	o
PH560_00885	PH560_00885-RB	33	o15-34i180-202o
PH560_00936	PH560_00936-RA	33	o15-34i180-202o
PH560_00936	PH560_00936-RB	22	o
PH560_00937	PH560_00937-RA	17	o218-240i
PH560_00942	PH560_00942-RA	23	o
PH560_00946	PH560_00946-RB	25	o
PH560_00964	PH560_00964-RA	24	o
PH560_00964	PH560_00964-RB	24	o13-35i
PH560_01000	PH560_01000-RC	26	o
PH560_01000	PH560_01000-RD	21	o
PH560_01000	PH560_01000-RE	21	o
PH560_01004	PH560_01004-RA	21	o
PH560_01004	PH560_01004-RB	21	o
PH560_01014	PH560_01014-RE	22	o
PH560_01016	PH560_01016-RA	55	i36-55o
PH560_01016	PH560_01016-RB	55	i36-55o
PH560_01016	PH560_01016-RC	55	i36-55o
PH560_01016	PH560_01016-RD	55	i36-55o
PH560_01036	PH560_01036-RB	22	o
PH560_01053	PH560_01053-RC	38	o
PH560_01077	PH560_01077-RD	44	i7-29o53-75i96-118o123-145i207-229o253-275i304-323o338-355i368-390o405-427i
PH560_01094	PH560_01094-RA	22	o
PH560_01094	PH560_01094-RB	22	o
PH560_01095	PH560_01095-RA	24	o
PH560_01095	PH560_01095-RB	24	o
PH560_01095	PH560_01095-RC	24	o
PH560_01096	PH560_01096-RE	21	o
PH560_01101	PH560_01101-RD	44	o25-47i60-78o
PH560_01105	PH560_01105-RA	24	i5-27o
PH560_01116	PH560_01116-RE	28	o
PH560_01124	PH560_01124-RA	21	o
PH560_01124	PH560_01124-RB	21	o
PH560_01124	PH560_01124-RC	21	o
PH560_01137	PH560_01137-RB	31	o
PH560_01137	PH560_01137-RD	31	o
PH560_01180	PH560_01180-RA	30	i158-180o195-217i222-241o
PH560_01180	PH560_01180-RB	30	i158-180o195-217i222-241o
PH560_01202	PH560_01202-RB	18	o
PH560_01219	PH560_01219-RA	18	o
PH560_01220	PH560_01220-RB	29	o
PH560_01235	PH560_01235-RA	16	o
PH560_01247	PH560_01247-RB	23	i
PH560_01256	PH560_01256-RA	32	o10-28i287-309o336-358i941-958o968-990i1020-1039o1059-1078i1085-1107o1122-1144i
PH560_01272	PH560_01272-RA	25	o529-551i
PH560_01272	PH560_01272-RB	25	o
PH560_01274	PH560_01274-RA	31	o
PH560_01295	PH560_01295-RA	16	o
PH560_01295	PH560_01295-RB	16	o
PH560_01313	PH560_01313-RA	30	o
PH560_01313	PH560_01313-RB	30	o
PH560_01326	PH560_01326-RA	19	o4-23i35-57o
PH560_01339	PH560_01339-RA	19	o471-493i
PH560_01348	PH560_01348-RA	25	i7-24o
PH560_01360	PH560_01360-RA	23	i7-29o
PH560_01404	PH560_01404-RB	18	i7-29o44-66i73-95o115-134i147-169o196-218i
PH560_01414	PH560_01414-RA	28	o
PH560_01422	PH560_01422-RH	29	o
PH560_01434	PH560_01434-RI	21	o
PH560_01437	PH560_01437-RB	23	o
PH560_01437	PH560_01437-RC	23	o175-197i
PH560_01437	PH560_01437-RD	23	o
PH560_01440	PH560_01440-RA	21	o
PH560_01442	PH560_01442-RA	40	o
PH560_01442	PH560_01442-RC	39	o
PH560_01446	PH560_01446-RB	18	o
PH560_01446	PH560_01446-RC	18	o
PH560_01446	PH560_01446-RD	18	o
PH560_01446	PH560_01446-RE	18	o
PH560_01446	PH560_01446-RF	18	o
PH560_01480	PH560_01480-RB	16	o
PH560_01491	PH560_01491-RB	17	i37-59o140-162i190-212o249-271i
PH560_01496	PH560_01496-RA	22	o
PH560_01496	PH560_01496-RB	22	o
PH560_01497	PH560_01497-RB	23	o
PH560_01499	PH560_01499-RA	24	o
PH560_01499	PH560_01499-RB	24	o
PH560_01538	PH560_01538-RB	21	o
PH560_01538	PH560_01538-RC	21	o
PH560_01550	PH560_01550-RC	28	o
PH560_01567	PH560_01567-RA	26	o
PH560_01567	PH560_01567-RB	26	o
PH560_01589	PH560_01589-RA	31	o246-268i
PH560_01589	PH560_01589-RB	31	o235-257i
PH560_01590	PH560_01590-RA	28	i7-29o
PH560_01591	PH560_01591-RA	21	o5-24i181-198o208-227i
PH560_01608	PH560_01608-RA	23	o
PH560_01608	PH560_01608-RB	23	o
PH560_01609	PH560_01609-RA	21	o4-21i
PH560_01609	PH560_01609-RB	21	o
PH560_01609	PH560_01609-RC	21	o
PH560_01619	PH560_01619-RD	17	o
PH560_01626	PH560_01626-RA	23	i2-24o
PH560_01626	PH560_01626-RB	23	i2-24o
PH560_01629	PH560_01629-RA	36	o10-32i
PH560_01629	PH560_01629-RB	36	i12-34o
PH560_01644	PH560_01644-RA	19	o
PH560_01651	PH560_01651-RA	26	o
PH560_01651	PH560_01651-RB	26	o
PH560_01651	PH560_01651-RC	31	o
PH560_01694	PH560_01694-RA	26	o
PH560_01697	PH560_01697-RB	30	o396-415i428-450o460-482i554-576o608-630i637-659o
PH560_01712	PH560_01712-RA	19	o
PH560_01712	PH560_01712-RB	19	o
PH560_01712	PH560_01712-RC	19	o
PH560_01741	PH560_01741-RA	26	i
PH560_01748	PH560_01748-RA	20	o
PH560_01748	PH560_01748-RB	20	o
PH560_01748	PH560_01748-RC	20	o
PH560_01748	PH560_01748-RD	20	o
PH560_01750	PH560_01750-RA	31	o10-32i
PH560_01783	PH560_01783-RB	20	o
PH560_01783	PH560_01783-RC	20	o
PH560_01783	PH560_01783-RD	20	o
PH560_01796	PH560_01796-RA	17	o36-58i148-170o185-207i214-231o
PH560_01815	PH560_01815-RA	23	o
PH560_01815	PH560_01815-RB	23	o
PH560_01844	PH560_01844-RA	17	o
PH560_01898	PH560_01898-RH	40	i9-31o
PH560_01898	PH560_01898-RI	40	i9-31o73-95i
PH560_01954	PH560_01954-RB	31	o
PH560_01954	PH560_01954-RD	31	o
PH560_01959	PH560_01959-RC	18	o
PH560_01968	PH560_01968-RC	21	o
PH560_01978	PH560_01978-RB	23	o
PH560_01993	PH560_01993-RC	19	o
PH560_01996	PH560_01996-RA	27	o194-216i
PH560_02009	PH560_02009-RB	23	o
PH560_02009	PH560_02009-RC	23	o
PH560_02027	PH560_02027-RA	71	o
PH560_02035	PH560_02035-RB	29	o10-32i52-74o102-124i131-150o209-231i261-283o311-333i340-362o382-404i417-436o
PH560_02043	PH560_02043-RA	28	o
PH560_02045	PH560_02045-RB	21	o
PH560_02050	PH560_02050-RA	21	o
PH560_02050	PH560_02050-RC	21	o
PH560_02089	PH560_02089-RC	22	o
PH560_02227	PH560_02227-RA	20	o1071-1093i2003-2025o2040-2059i2066-2088o2098-2120i2133-2155o2175-2197i2251-2273o2312-2334i2355-2377o2405-2427i
PH560_02242	PH560_02242-RA	18	i20-42o
PH560_02247	PH560_02247-RA	19	o
PH560_02249	PH560_02249-RA	21	o
PH560_02266	PH560_02266-RB	24	o
PH560_02269	PH560_02269-RB	25	o
PH560_02275	PH560_02275-RA	31	o205-227i
PH560_02276	PH560_02276-RG	19	o
PH560_02310	PH560_02310-RA	19	o
PH560_02310	PH560_02310-RB	19	o
PH560_02315	PH560_02315-RA	23	o
PH560_02344	PH560_02344-RA	20	o
PH560_02348	PH560_02348-RA	19	o
PH560_02352	PH560_02352-RE	20	o
PH560_02427	PH560_02427-RA	16	o
PH560_02453	PH560_02453-RG	21	o
PH560_02453	PH560_02453-RH	21	o
PH560_02453	PH560_02453-RI	21	o
PH560_02499	PH560_02499-RA	22	o
PH560_02511	PH560_02511-RB	21	o
PH560_02580	PH560_02580-RC	16	o
PH560_02581	PH560_02581-RA	18	o
PH560_02582	PH560_02582-RA	18	o
PH560_02582	PH560_02582-RB	18	o
PH560_02582	PH560_02582-RC	18	o
PH560_02612	PH560_02612-RE	23	o
PH560_02625	PH560_02625-RC	16	o
PH560_02665	PH560_02665-RA	24	o
PH560_02677	PH560_02677-RA	26	o
PH560_02677	PH560_02677-RB	22	o
PH560_02690	PH560_02690-RA	40	o20-42i62-81o85-107i164-186o
PH560_02699	PH560_02699-RA	21	i5-27o
PH560_02699	PH560_02699-RB	21	i5-27o
PH560_02705	PH560_02705-RA	23	i5-27o
PH560_02729	PH560_02729-RA	22	o
PH560_02735	PH560_02735-RA	22	o
PH560_02748	PH560_02748-RA	54	o
PH560_02753	PH560_02753-RD	29	o
PH560_02776	PH560_02776-RA	20	o
PH560_02787	PH560_02787-RJ	22	o
PH560_02792	PH560_02792-RC	20	o46-68i88-110o125-147i171-193o
PH560_02793	PH560_02793-RA	25	o
PH560_02798	PH560_02798-RA	16	o
PH560_02798	PH560_02798-RB	16	o
PH560_02800	PH560_02800-RA	19	o
PH560_02813	PH560_02813-RA	31	o
PH560_02821	PH560_02821-RA	27	o
PH560_02821	PH560_02821-RC	27	o
PH560_02821	PH560_02821-RD	30	o
PH560_02821	PH560_02821-RE	30	o
PH560_02821	PH560_02821-RG	30	o
PH560_02821	PH560_02821-RH	30	o
PH560_02832	PH560_02832-RA	30	o
PH560_02839	PH560_02839-RA	18	o
PH560_02845	PH560_02845-RA	27	i7-29o65-82i94-116o
PH560_02850	PH560_02850-RA	28	o
PH560_02855	PH560_02855-RA	22	o
PH560_02871	PH560_02871-RH	20	o
PH560_02894	PH560_02894-RA	20	o
PH560_02912	PH560_02912-RD	89	o
PH560_02914	PH560_02914-RA	20	i
PH560_02931	PH560_02931-RB	19	o
PH560_02945	PH560_02945-RA	21	o
PH560_02959	PH560_02959-RA	22	o
PH560_02959	PH560_02959-RB	22	o
PH560_02959	PH560_02959-RC	22	o
PH560_02960	PH560_02960-RA	22	o
PH560_02960	PH560_02960-RB	22	o
PH560_02960	PH560_02960-RC	22	o
PH560_02970	PH560_02970-RA	26	o543-565i
PH560_02975	PH560_02975-RA	33	o
PH560_02978	PH560_02978-RB	25	o
PH560_02990	PH560_02990-RA	20	o351-373i
PH560_02990	PH560_02990-RB	20	o340-362i
PH560_02992	PH560_02992-RA	18	o
PH560_02998	PH560_02998-RA	24	i7-29o
PH560_03014	PH560_03014-RA	29	o
PH560_03020	PH560_03020-RE	19	o
PH560_03022	PH560_03022-RH	17	o
PH560_03026	PH560_03026-RC	18	o
PH560_03037	PH560_03037-RA	20	o
PH560_03044	PH560_03044-RA	19	o
PH560_03044	PH560_03044-RC	19	o
PH560_03050	PH560_03050-RA	23	o
PH560_03050	PH560_03050-RB	23	o
PH560_03052	PH560_03052-RA	42	o
PH560_03089	PH560_03089-RA	21	i35-54o64-86i
PH560_03089	PH560_03089-RB	21	i35-54o64-86i
PH560_03093	PH560_03093-RA	21	o
PH560_03093	PH560_03093-RB	21	o
PH560_03093	PH560_03093-RC	21	o
PH560_03093	PH560_03093-RD	21	o
PH560_03093	PH560_03093-RE	21	o
PH560_03097	PH560_03097-RA	28	i7-28o
PH560_03106	PH560_03106-RA	23	o
PH560_03108	PH560_03108-RB	21	o
PH560_03123	PH560_03123-RI	17	o
PH560_03136	PH560_03136-RA	18	o160-182i189-211o
PH560_03136	PH560_03136-RB	18	o160-182i189-211o
PH560_03136	PH560_03136-RC	18	o160-182i189-211o
PH560_03188	PH560_03188-RC	14	o
PH560_03224	PH560_03224-RA	16	o
PH560_03225	PH560_03225-RA	22	o
PH560_03226	PH560_03226-RB	19	o
PH560_03273	PH560_03273-RC	20	o
PH560_03273	PH560_03273-RD	20	o
PH560_03284	PH560_03284-RA	20	o
PH560_03284	PH560_03284-RB	20	o
PH560_03284	PH560_03284-RC	20	o
PH560_03287	PH560_03287-RA	16	o
PH560_03293	PH560_03293-RC	21	o
PH560_03297	PH560_03297-RA	27	o
PH560_03328	PH560_03328-RA	27	o
PH560_03329	PH560_03329-RA	23	i7-26o
PH560_03329	PH560_03329-RB	23	i7-26o
PH560_03329	PH560_03329-RC	23	i7-26o
PH560_03344	PH560_03344-RB	19	o4-26i
PH560_03345	PH560_03345-RA	22	o
PH560_03349	PH560_03349-RB	23	o
PH560_03349	PH560_03349-RD	23	o
PH560_03356	PH560_03356-RA	35	o4-26i55-77o
PH560_03359	PH560_03359-RA	24	o
PH560_03359	PH560_03359-RB	24	o
PH560_03367	PH560_03367-RB	27	o
PH560_03367	PH560_03367-RC	27	o
PH560_03368	PH560_03368-RA	27	o
PH560_03368	PH560_03368-RB	27	o
PH560_03368	PH560_03368-RC	27	o
PH560_03368	PH560_03368-RD	27	o
PH560_03395	PH560_03395-RB	21	o
PH560_03425	PH560_03425-RD	23	o
PH560_03437	PH560_03437-RC	42	o
PH560_03437	PH560_03437-RD	27	i2-21o
PH560_03448	PH560_03448-RB	19	o
PH560_03467	PH560_03467-RD	31	o
PH560_03473	PH560_03473-RF	20	o
PH560_03497	PH560_03497-RA	26	o
PH560_03502	PH560_03502-RA	21	o
PH560_03502	PH560_03502-RB	21	o
PH560_03502	PH560_03502-RC	18	o
PH560_03508	PH560_03508-RA	25	i7-26o
PH560_03517	PH560_03517-RA	20	o
PH560_03517	PH560_03517-RB	20	o
PH560_03517	PH560_03517-RC	15	o
PH560_03526	PH560_03526-RB	33	o
PH560_03534	PH560_03534-RA	25	o
PH560_03534	PH560_03534-RL	22	o
PH560_03544	PH560_03544-RA	18	o
PH560_03549	PH560_03549-RA	18	o
PH560_03552	PH560_03552-RA	23	o
PH560_03559	PH560_03559-RB	26	o
PH560_03560	PH560_03560-RA	24	o
PH560_03560	PH560_03560-RB	24	o
PH560_03591	PH560_03591-RA	28	i13-35o684-706i
PH560_03591	PH560_03591-RB	28	i13-35o652-674i
PH560_03619	PH560_03619-RA	22	o
PH560_03628	PH560_03628-RB	20	o
PH560_03682	PH560_03682-RA	30	i137-159o174-193i206-228o243-265i277-294o
PH560_03688	PH560_03688-RA	19	o
PH560_03700	PH560_03700-RA	20	o
PH560_03701	PH560_03701-RA	20	o
PH560_03707	PH560_03707-RA	21	o
PH560_03707	PH560_03707-RB	21	o
PH560_03719	PH560_03719-RA	22	o
PH560_03729	PH560_03729-RA	21	o
PH560_03730	PH560_03730-RA	23	o
PH560_03744	PH560_03744-RA	26	o
PH560_03744	PH560_03744-RB	26	o
PH560_03745	PH560_03745-RA	24	o
PH560_03747	PH560_03747-RA	19	o
PH560_03749	PH560_03749-RA	19	o
PH560_03750	PH560_03750-RA	19	o
PH560_03761	PH560_03761-RA	23	o
PH560_03767	PH560_03767-RA	20	o
PH560_03773	PH560_03773-RA	16	o
PH560_03774	PH560_03774-RA	23	o
PH560_03774	PH560_03774-RB	23	o
PH560_03785	PH560_03785-RA	27	i7-24o
PH560_03785	PH560_03785-RB	27	i7-24o
PH560_03813	PH560_03813-RA	28	i7-29o
PH560_03815	PH560_03815-RA	23	o
PH560_03821	PH560_03821-RB	16	o
PH560_03830	PH560_03830-RB	25	o5-24i315-337o
PH560_03830	PH560_03830-RC	25	o5-24i315-337o
PH560_03855	PH560_03855-RA	30	o
PH560_03879	PH560_03879-RA	30	o
PH560_03884	PH560_03884-RA	20	o
PH560_03884	PH560_03884-RB	20	o
PH560_03900	PH560_03900-RA	26	o
PH560_03902	PH560_03902-RA	25	o
PH560_03903	PH560_03903-RB	24	o
PH560_04026	PH560_04026-RA	19	o
PH560_04033	PH560_04033-RB	31	o
PH560_04033	PH560_04033-RC	31	o
PH560_04033	PH560_04033-RF	25	o
PH560_04050	PH560_04050-RB	33	i7-29o39-58i71-93o
PH560_04060	PH560_04060-RA	20	o
PH560_04060	PH560_04060-RB	20	o
PH560_04065	PH560_04065-RB	45	o
PH560_04071	PH560_04071-RB	20	o
PH560_04071	PH560_04071-RD	19	o
PH560_04082	PH560_04082-RA	20	o
PH560_04084	PH560_04084-RD	69	o
PH560_04084	PH560_04084-RE	69	o
PH560_04088	PH560_04088-RA	36	o
PH560_04095	PH560_04095-RA	22	i2-24o
PH560_04095	PH560_04095-RD	21	i2-24o
PH560_04109	PH560_04109-RA	26	o
PH560_04123	PH560_04123-RA	22	i21-43o48-70i125-143o153-175i
PH560_04123	PH560_04123-RD	30	o5-27i87-109o132-154i166-185o200-219i232-254o289-311i316-338o342-364i419-437o447-469i
PH560_04123	PH560_04123-RE	30	o5-27i80-102o125-147i
PH560_04127	PH560_04127-RA	19	o
PH560_04132	PH560_04132-RC	19	o
PH560_04134	PH560_04134-RA	25	o
PH560_04134	PH560_04134-RB	25	o
PH560_04161	PH560_04161-RA	21	o
PH560_04161	PH560_04161-RB	21	o
PH560_04163	PH560_04163-RA	21	o
PH560_04189	PH560_04189-RB	21	o
PH560_04212	PH560_04212-RB	18	o
PH560_04226	PH560_04226-RC	25	o180-202i214-236o
PH560_04226	PH560_04226-RD	25	o180-202i214-236o
PH560_04229	PH560_04229-RA	20	i2-24o66-88i100-122o
PH560_04230	PH560_04230-RF	23	o
PH560_04232	PH560_04232-RC	19	o
PH560_04245	PH560_04245-RA	39	o163-185i
PH560_04245	PH560_04245-RB	39	o193-215i
PH560_04247	PH560_04247-RA	24	o
PH560_04254	PH560_04254-RA	24	o
PH560_04257	PH560_04257-RA	24	i177-199o204-226i239-261o
PH560_04260	PH560_04260-RA	16	o
PH560_04268	PH560_04268-RA	23	o
PH560_04275	PH560_04275-RB	33	o
PH560_04275	PH560_04275-RC	33	o
PH560_04278	PH560_04278-RB	20	o
PH560_04282	PH560_04282-RA	16	o
PH560_04294	PH560_04294-RA	16	o
PH560_04303	PH560_04303-RB	20	o31-53i93-115o
PH560_04328	PH560_04328-RA	20	o
PH560_04328	PH560_04328-RB	20	o
PH560_04366	PH560_04366-RA	19	o
PH560_04431	PH560_04431-RA	19	o
PH560_04431	PH560_04431-RB	30	i7-24o
PH560_04433	PH560_04433-RB	23	o
PH560_04433	PH560_04433-RC	23	o
PH560_04474	PH560_04474-RA	22	i9-31o1391-1410i1455-1477o
PH560_04487	PH560_04487-RA	25	o
PH560_04515	PH560_04515-RA	30	i5-24o
PH560_04518	PH560_04518-RH	24	o
PH560_04519	PH560_04519-RF	24	o
PH560_04553	PH560_04553-RA	24	i5-27o
PH560_04553	PH560_04553-RB	24	i5-27o
PH560_04553	PH560_04553-RC	24	i5-27o
PH560_04553	PH560_04553-RD	24	i5-27o
PH560_04561	PH560_04561-RA	20	i2-24o62-84i
PH560_04562	PH560_04562-RA	20	i2-24o62-84i
PH560_04627	PH560_04627-RA	16	o
PH560_04627	PH560_04627-RC	16	o
PH560_04636	PH560_04636-RB	22	o
PH560_04636	PH560_04636-RC	22	o
PH560_04638	PH560_04638-RB	24	o
PH560_04647	PH560_04647-RA	20	o4-26i
PH560_04651	PH560_04651-RC	34	i13-35o
PH560_04651	PH560_04651-RD	34	i13-35o
PH560_04656	PH560_04656-RA	24	o
PH560_04656	PH560_04656-RB	24	i7-29o
PH560_04667	PH560_04667-RA	16	o
PH560_04667	PH560_04667-RB	16	o
PH560_04674	PH560_04674-RB	23	o
PH560_04680	PH560_04680-RA	24	i7-24o
PH560_04681	PH560_04681-RA	19	o
PH560_04722	PH560_04722-RA	24	o5-24i
PH560_04730	PH560_04730-RA	25	o5-27i
PH560_04743	PH560_04743-RB	16	o
PH560_04751	PH560_04751-RA	27	o373-395i407-426o
PH560_04753	PH560_04753-RA	27	o
PH560_04754	PH560_04754-RA	26	o
PH560_04754	PH560_04754-RB	26	o206-228i380-402o
PH560_04759	PH560_04759-RB	21	o15-37i49-68o96-118i123-145o205-227i304-326o336-352i373-392o407-426i
PH560_04787	PH560_04787-RA	21	o
PH560_04789	PH560_04789-RA	19	o
PH560_04789	PH560_04789-RB	19	o
PH560_04798	PH560_04798-RA	16	o
PH560_04807	PH560_04807-RB	32	o
PH560_04847	PH560_04847-RA	23	i7-29o44-66i
PH560_04847	PH560_04847-RB	23	i7-29o44-66i
PH560_04851	PH560_04851-RA	19	i144-166o
PH560_04851	PH560_04851-RB	26	o4-26i156-178o
PH560_04885	PH560_04885-RA	23	i
PH560_04887	PH560_04887-RA	20	i2-24o59-81i
PH560_04888	PH560_04888-RA	20	i2-24o52-74i
PH560_04898	PH560_04898-RA	23	i7-29o69-91i
PH560_04900	PH560_04900-RA	23	i7-29o81-103i
PH560_04900	PH560_04900-RB	23	o5-27i40-62o72-94i
PH560_04906	PH560_04906-RA	23	i7-29o49-71i
PH560_04906	PH560_04906-RB	23	i7-29o44-66i
PH560_04908	PH560_04908-RA	23	i7-29o80-102i
PH560_04908	PH560_04908-RB	23	i5-27o42-64i71-93o
PH560_04912	PH560_04912-RA	20	o1071-1093i1306-1328o
PH560_04915	PH560_04915-RE	23	o
PH560_04946	PH560_04946-RC	25	i2-24o84-106i
PH560_04957	PH560_04957-RD	25	i5-24o84-106i
PH560_04965	PH560_04965-RA	24	i339-361o
PH560_04965	PH560_04965-RB	24	i286-308o
PH560_04965	PH560_04965-RC	24	i300-322o
PH560_04965	PH560_04965-RD	24	i340-362o
PH560_04965	PH560_04965-RE	24	i9-28o339-361i
PH560_04966	PH560_04966-RA	25	o
PH560_04972	PH560_04972-RC	28	o
PH560_04979	PH560_04979-RB	29	o437-459i
PH560_04987	PH560_04987-RA	21	o4-23i36-58o68-90i
PH560_04999	PH560_04999-RA	21	o4-23i36-58o68-90i
PH560_04999	PH560_04999-RB	21	o4-23i36-58o68-90i
PH560_05001	PH560_05001-RB	21	o4-23i35-54o69-91i
PH560_05001	PH560_05001-RD	21	o4-23i35-54o69-91i
PH560_05009	PH560_05009-RA	21	o4-23i36-58o68-90i
PH560_05009	PH560_05009-RB	21	o4-23i36-58o68-90i
PH560_05033	PH560_05033-RA	20	o
PH560_05035	PH560_05035-RD	28	o
PH560_05067	PH560_05067-RA	24	i7-29o
PH560_05072	PH560_05072-RB	20	o
PH560_05089	PH560_05089-RA	17	o
PH560_05089	PH560_05089-RB	17	o
PH560_05093	PH560_05093-RC	33	o
PH560_05100	PH560_05100-RA	24	i7-29o
PH560_05101	PH560_05101-RA	23	o
PH560_05121	PH560_05121-RA	18	i7-29o
PH560_05134	PH560_05134-RC	38	o
PH560_05134	PH560_05134-RE	38	o
PH560_05143	PH560_05143-RA	23	o
PH560_05153	PH560_05153-RA	19	o
PH560_05159	PH560_05159-RB	21	o
PH560_05163	PH560_05163-RA	23	o
PH560_05166	PH560_05166-RA	24	o
PH560_05166	PH560_05166-RB	24	o
PH560_05204	PH560_05204-RA	27	o
PH560_05204	PH560_05204-RB	27	o
PH560_05207	PH560_05207-RA	33	o
PH560_05208	PH560_05208-RB	27	o
PH560_05208	PH560_05208-RC	27	o
PH560_05235	PH560_05235-RA	29	o
PH560_05259	PH560_05259-RA	28	i7-25o
PH560_05259	PH560_05259-RB	28	o10-32i
PH560_05264	PH560_05264-RA	23	o
PH560_05276	PH560_05276-RA	30	o
PH560_05280	PH560_05280-RA	28	o
PH560_05294	PH560_05294-RA	16	o
PH560_05294	PH560_05294-RB	16	o
PH560_05320	PH560_05320-RA	21	o
PH560_05328	PH560_05328-RA	46	o20-39i52-74o94-116i129-151o634-651i658-680o
PH560_05330	PH560_05330-RA	22	o
PH560_05353	PH560_05353-RA	27	o161-183i224-246o
PH560_05401	PH560_05401-RA	21	i195-217o221-240i
PH560_05406	PH560_05406-RF	25	o
PH560_05447	PH560_05447-RA	21	o
PH560_05450	PH560_05450-RC	37	i9-31o
PH560_05475	PH560_05475-RA	20	o72-94i107-129o139-161i182-204o209-228i240-259o360-379i392-414o
PH560_05505	PH560_05505-RA	21	o
PH560_05515	PH560_05515-RA	26	i5-24o
PH560_05529	PH560_05529-RA	26	o
PH560_05537	PH560_05537-RA	25	i7-26o
PH560_05537	PH560_05537-RB	25	i7-25o
PH560_05546	PH560_05546-RC	26	o
PH560_05547	PH560_05547-RA	24	o
PH560_05628	PH560_05628-RA	21	o
PH560_05658	PH560_05658-RA	18	o
PH560_05662	PH560_05662-RB	22	o
PH560_05662	PH560_05662-RC	22	o
PH560_05662	PH560_05662-RD	22	o
PH560_05663	PH560_05663-RA	21	o
PH560_05663	PH560_05663-RB	21	o
PH560_05663	PH560_05663-RC	21	o
PH560_05663	PH560_05663-RD	21	o
PH560_05663	PH560_05663-RE	21	o
PH560_05663	PH560_05663-RG	21	o
PH560_05663	PH560_05663-RH	21	o
PH560_05663	PH560_05663-RI	21	o
PH560_05665	PH560_05665-RC	18	o
PH560_05667	PH560_05667-RA	21	o
PH560_05667	PH560_05667-RC	21	o
PH560_05667	PH560_05667-RD	21	o
PH560_05667	PH560_05667-RE	21	o
PH560_05667	PH560_05667-RF	21	o
PH560_05671	PH560_05671-RA	21	o
PH560_05671	PH560_05671-RC	21	o
PH560_05671	PH560_05671-RD	21	o
PH560_05671	PH560_05671-RE	21	o
PH560_05671	PH560_05671-RF	21	o
PH560_05672	PH560_05672-RE	20	o
PH560_05675	PH560_05675-RA	20	o
PH560_05675	PH560_05675-RB	20	o
PH560_05675	PH560_05675-RC	20	o
PH560_05675	PH560_05675-RD	20	o
PH560_05675	PH560_05675-RE	20	o
PH560_05675	PH560_05675-RF	20	o
PH560_05684	PH560_05684-RA	19	o
PH560_05727	PH560_05727-RA	19	i120-142o157-174i181-203o
PH560_05747	PH560_05747-RA	21	o
PH560_05761	PH560_05761-RA	21	o
PH560_05761	PH560_05761-RB	21	o
PH560_05761	PH560_05761-RC	21	o
PH560_05773	PH560_05773-RC	31	o
PH560_05773	PH560_05773-RE	31	o
PH560_05780	PH560_05780-RB	19	o
PH560_05780	PH560_05780-RE	19	o
PH560_05780	PH560_05780-RF	19	o
PH560_05808	PH560_05808-RA	27	o
PH560_05853	PH560_05853-RB	25	o265-287i320-342o362-384i405-427o467-498i519-541o
PH560_05899	PH560_05899-RA	18	o
PH560_05899	PH560_05899-RB	18	o
PH560_05931	PH560_05931-RB	21	o
PH560_05932	PH560_05932-RA	27	o
PH560_05954	PH560_05954-RB	26	i7-29o
PH560_05984	PH560_05984-RA	22	o
PH560_06020	PH560_06020-RA	20	i5-27o
PH560_06035	PH560_06035-RB	25	o
PH560_06084	PH560_06084-RA	27	o
PH560_06098	PH560_06098-RA	24	i153-175o
PH560_06098	PH560_06098-RB	24	i155-177o
PH560_06103	PH560_06103-RA	24	i155-177o
PH560_06103	PH560_06103-RB	31	i7-29o
PH560_06103	PH560_06103-RC	24	i155-177o
PH560_06103	PH560_06103-RD	24	i153-175o
PH560_06104	PH560_06104-RA	25	o
PH560_06114	PH560_06114-RA	22	o
PH560_06114	PH560_06114-RH	22	o
PH560_06129	PH560_06129-RA	32	o
PH560_06157	PH560_06157-RA	22	o
PH560_06157	PH560_06157-RB	22	o
PH560_06157	PH560_06157-RC	22	o
PH560_06223	PH560_06223-RJ	38	o
PH560_06228	PH560_06228-RA	21	o
PH560_06231	PH560_06231-RC	23	o
PH560_06233	PH560_06233-RA	22	o163-185i192-214o224-246i253-275o290-312i
PH560_06296	PH560_06296-RB	25	o
PH560_06320	PH560_06320-RA	20	o
PH560_06320	PH560_06320-RB	20	o
PH560_06390	PH560_06390-RA	23	o
PH560_06390	PH560_06390-RB	23	o
PH560_06403	PH560_06403-RG	27	o
PH560_06403	PH560_06403-RH	27	o
PH560_06403	PH560_06403-RI	27	o
PH560_06403	PH560_06403-RJ	27	o
PH560_06409	PH560_06409-RA	22	o
PH560_06451	PH560_06451-RA	33	o
PH560_06453	PH560_06453-RB	18	o
PH560_06456	PH560_06456-RA	22	i56-78o88-110i122-141o
PH560_06469	PH560_06469-RA	26	o
PH560_06474	PH560_06474-RA	20	o
PH560_06484	PH560_06484-RA	22	o
PH560_06484	PH560_06484-RD	22	o
PH560_06494	PH560_06494-RA	23	o
PH560_06496	PH560_06496-RA	27	i9-31o110-132i144-166o186-208i
PH560_06557	PH560_06557-RA	28	i5-27o
PH560_06568	PH560_06568-RD	55	i2-24o34-52i
PH560_06577	PH560_06577-RA	28	o238-255i
PH560_06578	PH560_06578-RA	19	o323-345i736-758o768-790i819-841o846-868i875-897o962-984i
PH560_06578	PH560_06578-RB	30	o334-356i747-769o779-801i830-852o857-879i886-908o973-995i
PH560_06612	PH560_06612-RA	16	o
PH560_06686	PH560_06686-RA	31	o
PH560_06695	PH560_06695-RA	30	o
PH560_06695	PH560_06695-RB	30	o
PH560_06709	PH560_06709-RE	42	o
PH560_06709	PH560_06709-RP	20	o
PH560_06713	PH560_06713-RA	27	o
PH560_06714	PH560_06714-RA	25	o
PH560_06732	PH560_06732-RA	92	o
PH560_06764	PH560_06764-RA	19	o536-558i579-601o
PH560_06798	PH560_06798-RC	30	o
PH560_06798	PH560_06798-RD	30	o
PH560_06798	PH560_06798-RE	30	o5-27i227-249o
PH560_06804	PH560_06804-RA	17	o
PH560_06828	PH560_06828-RA	22	i7-26o31-53i
PH560_06865	PH560_06865-RA	18	o
PH560_06876	PH560_06876-RA	22	i7-26o31-53i
PH560_06884	PH560_06884-RA	22	o
PH560_06943	PH560_06943-RG	23	o
PH560_06947	PH560_06947-RA	20	o
PH560_06978	PH560_06978-RK	90	o
PH560_06978	PH560_06978-RL	100	o
PH560_06978	PH560_06978-RM	89	o
PH560_06983	PH560_06983-RI	20	o
PH560_07003	PH560_07003-RD	24	o
PH560_07021	PH560_07021-RA	22	o352-374i817-839o849-871i900-922o927-949i956-978o
PH560_07021	PH560_07021-RB	22	o352-374i817-839o849-871i900-922o927-949i956-978o1045-1067i
PH560_07101	PH560_07101-RB	70	i5-27o42-64i129-148o153-175i
PH560_07132	PH560_07132-RG	40	i9-31o73-95i
PH560_07138	PH560_07138-RA	22	o
PH560_07149	PH560_07149-RA	26	o
PH560_07156	PH560_07156-RA	23	i5-27o159-181i
PH560_07157	PH560_07157-RA	21	o
PH560_07157	PH560_07157-RB	21	o
PH560_07164	PH560_07164-RJ	20	o
PH560_07166	PH560_07166-RA	20	o
PH560_07166	PH560_07166-RB	20	o
PH560_07174	PH560_07174-RB	20	o
PH560_07174	PH560_07174-RC	20	o
PH560_07200	PH560_07200-RA	28	i5-27o
PH560_07201	PH560_07201-RA	24	o
PH560_07201	PH560_07201-RB	24	o
PH560_07227	PH560_07227-RA	24	i459-481o
PH560_07240	PH560_07240-RA	29	o
PH560_07286	PH560_07286-RA	23	o
PH560_07331	PH560_07331-RB	19	o
PH560_07331	PH560_07331-RC	19	o
PH560_07349	PH560_07349-RB	86	o
PH560_07364	PH560_07364-RA	24	o
PH560_07368	PH560_07368-RA	32	i13-32o
PH560_07398	PH560_07398-RA	19	o
PH560_07398	PH560_07398-RB	19	o
PH560_07398	PH560_07398-RC	19	o
PH560_07398	PH560_07398-RD	19	o
PH560_07398	PH560_07398-RH	19	o
PH560_07399	PH560_07399-RA	19	o
PH560_07407	PH560_07407-RA	24	o
PH560_07432	PH560_07432-RA	24	o
PH560_07445	PH560_07445-RA	20	o
PH560_07465	PH560_07465-RA	24	o
PH560_07477	PH560_07477-RB	16	o
PH560_07493	PH560_07493-RA	24	o4-21i42-64o127-149i210-232o367-389i410-432o
PH560_07505	PH560_07505-RA	24	o
PH560_07505	PH560_07505-RB	24	o
PH560_07509	PH560_07509-RA	22	o
PH560_07510	PH560_07510-RA	23	o161-183i
PH560_07523	PH560_07523-RB	23	o
PH560_07557	PH560_07557-RA	29	i7-29o
PH560_07557	PH560_07557-RB	29	i7-29o
PH560_07560	PH560_07560-RA	29	i7-29o
PH560_07563	PH560_07563-RA	27	o
PH560_07563	PH560_07563-RB	27	o
PH560_07563	PH560_07563-RC	27	o
PH560_07566	PH560_07566-RC	36	i13-35o
PH560_07573	PH560_07573-RB	19	i33-55o78-100i121-143o147-169i190-212o227-249i256-278o298-320i418-440o465-487i
PH560_07573	PH560_07573-RC	40	o10-32i54-76o99-121i142-164o168-190i211-233o248-270i277-299o319-341i439-461o486-508i
PH560_07575	PH560_07575-RA	21	o
PH560_07575	PH560_07575-RB	21	o
PH560_07575	PH560_07575-RC	21	o
PH560_07579	PH560_07579-RA	21	o
PH560_07579	PH560_07579-RB	21	o
PH560_07579	PH560_07579-RC	21	o
PH560_07579	PH560_07579-RD	21	o
PH560_07579	PH560_07579-RE	21	o
PH560_07595	PH560_07595-RA	21	o
PH560_07595	PH560_07595-RB	21	o
PH560_07595	PH560_07595-RD	21	o
PH560_07595	PH560_07595-RE	21	o
PH560_07597	PH560_07597-RB	20	o
PH560_07677	PH560_07677-RA	21	o
PH560_07677	PH560_07677-RB	21	o
PH560_07680	PH560_07680-RA	36	o
PH560_07680	PH560_07680-RB	36	o
PH560_07705	PH560_07705-RA	21	o
PH560_07713	PH560_07713-RB	23	o
PH560_07723	PH560_07723-RA	24	o
PH560_07723	PH560_07723-RB	24	o
PH560_07725	PH560_07725-RC	38	i9-31o
PH560_07725	PH560_07725-RD	38	i9-31o
PH560_07751	PH560_07751-RA	24	o
PH560_07751	PH560_07751-RB	24	o
PH560_07753	PH560_07753-RA	19	o
PH560_07770	PH560_07770-RA	36	o
PH560_07770	PH560_07770-RB	36	o
PH560_07773	PH560_07773-RB	21	o
PH560_07773	PH560_07773-RD	21	o
PH560_07775	PH560_07775-RA	22	o
PH560_07775	PH560_07775-RH	22	o
PH560_07807	PH560_07807-RA	25	i5-22o32-54i
PH560_07821	PH560_07821-RL	23	o
PH560_07825	PH560_07825-RA	18	o
PH560_07830	PH560_07830-RB	19	o
PH560_07830	PH560_07830-RC	19	o
PH560_07830	PH560_07830-RD	19	o
PH560_07830	PH560_07830-RF	19	o
PH560_07831	PH560_07831-RB	26	i7-29o111-133i140-162o187-209i
PH560_07854	PH560_07854-RC	17	i2-21o36-58i65-87o92-114i131-153o168-190i210-229o286-305i326-348o363-385i
PH560_07859	PH560_07859-RA	26	o137-159i164-186o204-226i233-255o336-358i378-395o459-481i494-516o539-561i
PH560_07859	PH560_07859-RB	26	o137-159i164-186o204-226i233-255o336-358i378-395o428-450i462-481o496-518i539-561o
PH560_07859	PH560_07859-RC	26	o137-159i164-186o204-226i233-255o336-358i378-395o428-450i462-481o496-518i539-561o
PH560_07859	PH560_07859-RE	40	i5-27o97-119i139-156o189-211i223-242o257-279i300-322o
PH560_07862	PH560_07862-RA	30	o
PH560_07881	PH560_07881-RA	35	o10-32i39-56o71-93i270-292o358-380i
PH560_07881	PH560_07881-RB	35	o10-32i39-56o71-93i270-292o358-380i
PH560_07885	PH560_07885-RA	23	o4-26i
PH560_07888	PH560_07888-RA	60	i7-29o39-61i115-137o160-182i
PH560_07897	PH560_07897-RA	22	o
PH560_07899	PH560_07899-RB	29	i7-29o
PH560_07904	PH560_07904-RA	29	i7-29o
PH560_07911	PH560_07911-RA	19	o
PH560_07917	PH560_07917-RB	22	o
PH560_07935	PH560_07935-RB	22	i64-86o146-168i212-231o246-268i275-294o
PH560_07953	PH560_07953-RA	23	o
PH560_07957	PH560_07957-RA	19	o
PH560_07990	PH560_07990-RA	25	o
PH560_08043	PH560_08043-RA	21	o
PH560_08052	PH560_08052-RA	17	o
PH560_08052	PH560_08052-RB	17	o
PH560_08052	PH560_08052-RC	17	o
PH560_08055	PH560_08055-RF	21	o
PH560_08065	PH560_08065-RA	20	o
PH560_08068	PH560_08068-RA	24	o
PH560_08080	PH560_08080-RA	31	i9-31o
PH560_08081	PH560_08081-RA	26	i7-29o
PH560_08120	PH560_08120-RC	25	o
PH560_08120	PH560_08120-RD	25	o
PH560_08138	PH560_08138-RB	32	o
PH560_08138	PH560_08138-RC	19	o
PH560_08218	PH560_08218-RB	20	o72-94i107-129o139-161i182-204o209-228i240-259o360-379i392-414o
PH560_08248	PH560_08248-RA	24	o4-26i
PH560_08248	PH560_08248-RB	24	o4-26i
PH560_08254	PH560_08254-RA	23	o
PH560_08254	PH560_08254-RB	23	o
PH560_08254	PH560_08254-RC	21	o
PH560_08271	PH560_08271-RC	22	i2-24o
PH560_08273	PH560_08273-RA	25	i7-29o
PH560_08273	PH560_08273-RC	25	o269-287i294-316o
PH560_08278	PH560_08278-RA	19	o
PH560_08280	PH560_08280-RB	16	o
PH560_08286	PH560_08286-RA	27	o
PH560_08287	PH560_08287-RB	24	o
PH560_08287	PH560_08287-RD	24	o
PH560_08300	PH560_08300-RA	19	o
PH560_08300	PH560_08300-RB	19	o
PH560_08304	PH560_08304-RA	23	o
PH560_08332	PH560_08332-RB	72	i7-29o44-66i
PH560_08335	PH560_08335-RA	22	o
PH560_08349	PH560_08349-RA	20	o
PH560_08384	PH560_08384-RA	21	o
PH560_08384	PH560_08384-RB	21	o
PH560_08404	PH560_08404-RA	20	o
PH560_08404	PH560_08404-RB	20	o
PH560_08404	PH560_08404-RC	20	o
PH560_08411	PH560_08411-RB	29	o
PH560_08421	PH560_08421-RA	36	i19-36o
PH560_08430	PH560_08430-RA	19	o
PH560_08439	PH560_08439-RA	28	o
PH560_08439	PH560_08439-RB	21	o
PH560_08447	PH560_08447-RA	19	i2-24o39-58i85-107o122-144i151-173o193-215i
PH560_08447	PH560_08447-RB	17	o4-23i40-59o85-107i120-142o162-184i205-227o
PH560_08447	PH560_08447-RC	17	i5-27o42-64i85-103o123-145i158-180o195-217i
PH560_08447	PH560_08447-RD	38	o15-37i61-80o85-102i107-129o144-166i173-195o215-237i
PH560_08447	PH560_08447-RE	38	o15-37i61-80o85-102i107-129o144-166i179-201o216-238i
PH560_08447	PH560_08447-RF	19	i2-24o39-58i85-107o122-144i157-179o194-213i
PH560_08447	PH560_08447-RG	17	o4-23i40-59o69-88i95-112o127-149i162-184o199-218i
PH560_08456	PH560_08456-RC	20	o
PH560_08460	PH560_08460-RA	22	o
PH560_08460	PH560_08460-RB	22	o
PH560_08465	PH560_08465-RA	22	o
PH560_08465	PH560_08465-RB	22	o
PH560_08494	PH560_08494-RD	44	o173-195i239-261o
PH560_08497	PH560_08497-RB	22	o
PH560_08514	PH560_08514-RA	38	i13-35o
PH560_08514	PH560_08514-RB	28	i7-29o
PH560_08519	PH560_08519-RE	22	o
PH560_08541	PH560_08541-RA	26	o
PH560_08544	PH560_08544-RB	30	o5-22i61-80o100-122i
PH560_08548	PH560_08548-RA	22	o
PH560_08562	PH560_08562-RA	30	o
PH560_08571	PH560_08571-RA	25	i7-29o
PH560_08571	PH560_08571-RB	25	i7-29o
PH560_08582	PH560_08582-RA	19	o
PH560_08594	PH560_08594-RB	31	o
PH560_08594	PH560_08594-RC	31	o
PH560_08600	PH560_08600-RA	36	i13-35o
PH560_08640	PH560_08640-RD	19	o
PH560_08643	PH560_08643-RC	21	o
PH560_08646	PH560_08646-RC	25	o
PH560_08699	PH560_08699-RA	21	i5-22o52-74i81-103o113-135i142-164o189-211i223-245o
PH560_08699	PH560_08699-RB	21	i5-22o52-74i81-103o113-135i142-164o189-211i223-245o
PH560_08702	PH560_08702-RB	29	o132-154i161-183o193-215i222-239o249-271i278-300o320-342i
PH560_08702	PH560_08702-RC	35	o138-160i167-189o199-221i228-245o255-277i284-306o326-348i
PH560_08717	PH560_08717-RA	28	o
PH560_08740	PH560_08740-RG	18	o
PH560_08747	PH560_08747-RA	25	o
PH560_08749	PH560_08749-RA	25	o
PH560_08751	PH560_08751-RA	27	i
PH560_08757	PH560_08757-RA	25	o
PH560_08819	PH560_08819-RB	24	o
PH560_08819	PH560_08819-RC	24	o
PH560_08820	PH560_08820-RA	27	o
PH560_08834	PH560_08834-RC	46	o
PH560_08834	PH560_08834-RE	19	o
PH560_08861	PH560_08861-RA	22	o4-26i
PH560_08861	PH560_08861-RB	22	o4-26i
PH560_08874	PH560_08874-RA	25	o5-27i
PH560_08902	PH560_08902-RA	22	o
PH560_08932	PH560_08932-RB	24	o
PH560_08965	PH560_08965-RA	21	i34-53o63-85i
PH560_08965	PH560_08965-RB	21	o
PH560_08965	PH560_08965-RC	21	o
PH560_08979	PH560_08979-RA	23	i150-169o
PH560_08992	PH560_08992-RD	28	o10-32i
PH560_09002	PH560_09002-RA	25	o
PH560_09021	PH560_09021-RA	19	o
PH560_09026	PH560_09026-RD	20	o
PH560_09026	PH560_09026-RG	20	o
PH560_09050	PH560_09050-RA	20	o
PH560_09058	PH560_09058-RA	19	o
PH560_09067	PH560_09067-RA	31	i125-147o162-184i
PH560_09068	PH560_09068-RA	20	o
PH560_09080	PH560_09080-RB	25	o
PH560_09094	PH560_09094-RD	30	o
PH560_09114	PH560_09114-RA	40	o589-611i
PH560_09114	PH560_09114-RB	40	o565-587i
PH560_09118	PH560_09118-RA	23	o
PH560_09118	PH560_09118-RB	23	o
PH560_09134	PH560_09134-RA	25	i7-28o111-133i145-167o187-209i
PH560_09136	PH560_09136-RA	19	o
PH560_09140	PH560_09140-RA	26	o230-247i
PH560_09140	PH560_09140-RB	26	o230-247i
PH560_09141	PH560_09141-RA	18	o
PH560_09154	PH560_09154-RA	23	o
PH560_09171	PH560_09171-RB	23	o
PH560_09171	PH560_09171-RC	23	o
PH560_09171	PH560_09171-RD	24	o
PH560_09171	PH560_09171-RE	24	o
PH560_09171	PH560_09171-RF	23	o
PH560_09171	PH560_09171-RH	24	o
PH560_09171	PH560_09171-RI	24	o
PH560_09190	PH560_09190-RA	20	o
PH560_09223	PH560_09223-RA	32	i12-34o
PH560_09223	PH560_09223-RB	32	i12-34o
PH560_09230	PH560_09230-RA	29	o
PH560_09230	PH560_09230-RB	29	o
PH560_09243	PH560_09243-RA	19	o
PH560_09243	PH560_09243-RB	19	o
PH560_09271	PH560_09271-RD	22	o
PH560_09271	PH560_09271-RE	22	o
PH560_09271	PH560_09271-RF	22	o
PH560_09275	PH560_09275-RA	24	o
PH560_09275	PH560_09275-RB	24	o
PH560_09276	PH560_09276-RB	28	i5-27o
PH560_09293	PH560_09293-RA	38	o
PH560_09295	PH560_09295-RA	19	o
PH560_09295	PH560_09295-RB	19	o
PH560_09300	PH560_09300-RB	18	i68-86o111-133i188-210o230-252i289-311o
PH560_09301	PH560_09301-RA	22	o
PH560_09301	PH560_09301-RB	22	o
PH560_09301	PH560_09301-RE	22	o
PH560_09316	PH560_09316-RA	27	i7-29o
PH560_09318	PH560_09318-RA	18	o
PH560_09322	PH560_09322-RA	22	o
PH560_09322	PH560_09322-RB	22	o
PH560_09341	PH560_09341-RA	21	o150-172i272-294o299-321i364-386o406-428i441-463o
PH560_09346	PH560_09346-RA	20	o
PH560_09346	PH560_09346-RB	20	o
PH560_09346	PH560_09346-RC	20	o
PH560_09349	PH560_09349-RA	24	o
PH560_09361	PH560_09361-RA	26	o4-26i
PH560_09370	PH560_09370-RA	25	o
PH560_09371	PH560_09371-RA	18	o
PH560_09371	PH560_09371-RB	24	o4-23i116-135o
PH560_09378	PH560_09378-RA	28	o
PH560_09378	PH560_09378-RD	28	o
PH560_09386	PH560_09386-RA	29	i12-34o
PH560_09397	PH560_09397-RB	29	o
PH560_09409	PH560_09409-RB	25	o202-221i
PH560_09409	PH560_09409-RC	23	o
PH560_09412	PH560_09412-RA	34	o
PH560_09432	PH560_09432-RA	21	o
PH560_09432	PH560_09432-RB	21	o
PH560_09462	PH560_09462-RB	20	o
PH560_09468	PH560_09468-RA	24	i7-24o39-61i
PH560_09471	PH560_09471-RB	25	o
PH560_09471	PH560_09471-RC	25	o
PH560_09475	PH560_09475-RA	16	o
PH560_09488	PH560_09488-RA	24	i7-29o93-115i170-192o226-248i
PH560_09488	PH560_09488-RB	80	i7-29o61-83i138-160o
PH560_09488	PH560_09488-RC	24	i7-29o71-93i148-170o
PH560_09498	PH560_09498-RA	25	i5-24o
PH560_09506	PH560_09506-RA	16	o
PH560_09506	PH560_09506-RC	16	o
PH560_09518	PH560_09518-RA	36	o
PH560_09525	PH560_09525-RA	20	o
PH560_09538	PH560_09538-RA	20	o
PH560_09542	PH560_09542-RA	26	o
PH560_09542	PH560_09542-RB	26	o
PH560_09562	PH560_09562-RC	26	o
PH560_09562	PH560_09562-RD	26	o
PH560_09562	PH560_09562-RE	26	o
PH560_09581	PH560_09581-RA	24	o
PH560_09581	PH560_09581-RB	24	o
PH560_09633	PH560_09633-RB	21	o28-50i63-85o95-117i124-146o
PH560_09634	PH560_09634-RB	24	o
PH560_09640	PH560_09640-RA	26	o
PH560_09640	PH560_09640-RB	22	o
PH560_09683	PH560_09683-RA	24	i7-29o
PH560_09687	PH560_09687-RA	24	i187-209o219-241i
PH560_09691	PH560_09691-RA	29	i7-26o
PH560_09691	PH560_09691-RB	29	i7-26o
PH560_09691	PH560_09691-RC	29	i7-26o
PH560_09750	PH560_09750-RA	33	o4-21i
PH560_09762	PH560_09762-RB	17	o
PH560_09776	PH560_09776-RA	23	i184-206o210-232i
PH560_09776	PH560_09776-RB	23	i145-167o
PH560_09776	PH560_09776-RC	23	i184-206o210-232i
PH560_09776	PH560_09776-RD	23	i184-206o210-232i
PH560_09776	PH560_09776-RE	23	i184-206o210-232i
PH560_09781	PH560_09781-RA	16	o
PH560_09798	PH560_09798-RC	21	o
PH560_09812	PH560_09812-RA	24	o6-28i
PH560_09875	PH560_09875-RB	21	o
PH560_09887	PH560_09887-RA	17	o
PH560_09887	PH560_09887-RB	17	o
PH560_09899	PH560_09899-RA	25	o
PH560_09899	PH560_09899-RB	25	o
PH560_09904	PH560_09904-RB	20	o
PH560_09904	PH560_09904-RC	20	o
PH560_09911	PH560_09911-RA	22	o
PH560_09935	PH560_09935-RA	24	o
PH560_09938	PH560_09938-RA	16	o
PH560_09942	PH560_09942-RA	27	o
PH560_09999	PH560_09999-RB	26	o
PH560_10038	PH560_10038-RA	20	o
PH560_10038	PH560_10038-RB	23	o
PH560_10045	PH560_10045-RA	16	o
PH560_10084	PH560_10084-RA	24	o
PH560_10092	PH560_10092-RF	16	o76-98i143-165o180-202i
PH560_10105	PH560_10105-RA	16	o
PH560_10105	PH560_10105-RB	16	o
PH560_10106	PH560_10106-RF	21	o76-98i143-165o180-202i
PH560_10116	PH560_10116-RA	18	o
PH560_10117	PH560_10117-RA	23	o
PH560_10117	PH560_10117-RB	23	o
PH560_10118	PH560_10118-RA	26	o
PH560_10118	PH560_10118-RB	26	o
PH560_10148	PH560_10148-RD	17	o205-227i
PH560_10154	PH560_10154-RI	36	o
PH560_10154	PH560_10154-RJ	46	o
PH560_10175	PH560_10175-RA	16	o
PH560_10217	PH560_10217-RA	22	o
PH560_10257	PH560_10257-RA	24	o
PH560_10267	PH560_10267-RA	18	o
PH560_10288	PH560_10288-RC	23	o
PH560_10288	PH560_10288-RF	23	o
PH560_10288	PH560_10288-RG	23	o
PH560_10288	PH560_10288-RH	23	o
PH560_10288	PH560_10288-RM	23	o
PH560_10288	PH560_10288-RO	23	o
PH560_10294	PH560_10294-RB	21	o
PH560_10305	PH560_10305-RA	33	o
PH560_10338	PH560_10338-RE	25	o
PH560_10379	PH560_10379-RA	28	o
PH560_10379	PH560_10379-RB	43	o
PH560_10422	PH560_10422-RA	25	o
PH560_10427	PH560_10427-RI	22	o
PH560_10429	PH560_10429-RA	18	o
PH560_10438	PH560_10438-RB	22	o
PH560_10536	PH560_10536-RA	38	o
PH560_10536	PH560_10536-RB	21	o
PH560_10565	PH560_10565-RB	16	o
PH560_10565	PH560_10565-RC	16	o
PH560_10565	PH560_10565-RF	16	o
PH560_10634	PH560_10634-RB	20	o
PH560_10637	PH560_10637-RD	20	o
PH560_10649	PH560_10649-RA	20	i2-24o73-95i
PH560_10649	PH560_10649-RB	20	o4-23i52-74o84-106i
PH560_10649	PH560_10649-RC	20	i2-24o76-98i
PH560_10649	PH560_10649-RD	20	o4-23i53-75o85-107i
PH560_10649	PH560_10649-RE	20	i2-24o73-95i
PH560_10650	PH560_10650-RA	20	i2-24o63-85i
PH560_10667	PH560_10667-RA	20	i2-24o58-80i
PH560_10667	PH560_10667-RB	20	i2-24o58-80i
PH560_10667	PH560_10667-RC	20	i2-24o58-80i
PH560_10668	PH560_10668-RA	20	i2-24o66-88i
PH560_10668	PH560_10668-RB	20	i2-24o58-80i
PH560_10689	PH560_10689-RD	17	o
PH560_10697	PH560_10697-RE	17	o
PH560_10701	PH560_10701-RA	16	o
PH560_10711	PH560_10711-RA	30	o
PH560_10711	PH560_10711-RB	30	o
PH560_10724	PH560_10724-RC	23	o
PH560_10741	PH560_10741-RA	16	o
PH560_10741	PH560_10741-RB	16	o
PH560_10773	PH560_10773-RA	50	o
PH560_10783	PH560_10783-RE	24	o
PH560_10802	PH560_10802-RE	29	o
PH560_10812	PH560_10812-RB	24	i
PH560_10836	PH560_10836-RA	29	o
PH560_10865	PH560_10865-RA	27	o
PH560_10878	PH560_10878-RA	22	o
PH560_10885	PH560_10885-RB	19	o
PH560_10908	PH560_10908-RA	27	i7-29o
PH560_10909	PH560_10909-RB	25	o
PH560_10914	PH560_10914-RA	25	i63-80o
PH560_10914	PH560_10914-RB	25	o
PH560_10914	PH560_10914-RC	24	o
PH560_10914	PH560_10914-RD	24	o
PH560_10931	PH560_10931-RA	20	o
PH560_10931	PH560_10931-RB	20	o
PH560_10937	PH560_10937-RA	26	o276-298i
PH560_10937	PH560_10937-RB	26	o286-308i
PH560_10945	PH560_10945-RB	24	o
PH560_10949	PH560_10949-RB	29	i7-26o111-133i140-162o187-209i
PH560_10973	PH560_10973-RA	22	o
PH560_10979	PH560_10979-RB	23	o
PH560_10992	PH560_10992-RB	18	o
PH560_11030	PH560_11030-RA	21	i195-217o
PH560_11030	PH560_11030-RB	29	i203-225o
PH560_11030	PH560_11030-RC	29	i203-225o
PH560_11043	PH560_11043-RA	24	i7-24o61-83i
PH560_11046	PH560_11046-RB	21	o
PH560_11054	PH560_11054-RA	28	o50-72i
PH560_11056	PH560_11056-RA	32	i12-29o140-162i
PH560_11060	PH560_11060-RA	28	i190-212o
PH560_11060	PH560_11060-RB	28	o
PH560_11067	PH560_11067-RB	16	o118-140i222-244o259-281i301-323o545-567i670-689o
PH560_11067	PH560_11067-RC	16	o118-140i222-244o259-281i301-323o545-567i682-701o
PH560_11082	PH560_11082-RA	38	o
PH560_11082	PH560_11082-RB	38	o
PH560_11088	PH560_11088-RA	20	o31-53i93-115o
PH560_11137	PH560_11137-RA	26	i5-24o34-56i77-99o109-131i
PH560_11142	PH560_11142-RA	20	o
PH560_11144	PH560_11144-RA	22	o
PH560_11144	PH560_11144-RB	22	o
PH560_11160	PH560_11160-RB	22	o
PH560_11172	PH560_11172-RB	38	o
PH560_11172	PH560_11172-RC	38	o
PH560_11176	PH560_11176-RA	23	o
PH560_11176	PH560_11176-RB	23	o
PH560_11176	PH560_11176-RC	23	o
PH560_11196	PH560_11196-RC	21	o
PH560_11203	PH560_11203-RA	20	o
PH560_11203	PH560_11203-RB	20	o
PH560_11203	PH560_11203-RC	20	o
PH560_11204	PH560_11204-RA	17	i7-29o
PH560_11224	PH560_11224-RA	27	i7-29o52-74i83-105o120-142i149-171o
PH560_11239	PH560_11239-RA	25	o
PH560_11240	PH560_11240-RA	37	o
PH560_11248	PH560_11248-RB	21	o
PH560_11252	PH560_11252-RA	18	o
PH560_11255	PH560_11255-RA	22	o
PH560_11255	PH560_11255-RB	22	o
PH560_11264	PH560_11264-RB	24	o
PH560_11289	PH560_11289-RA	12	o
PH560_11289	PH560_11289-RB	12	o62-84i
PH560_11289	PH560_11289-RC	12	i47-69o73-95i
PH560_11290	PH560_11290-RA	20	i2-24o62-84i
PH560_11296	PH560_11296-RA	29	o213-235i242-264o279-301i
PH560_11300	PH560_11300-RA	20	i2-24o62-84i
PH560_11301	PH560_11301-RA	20	i2-24o67-89i
PH560_11301	PH560_11301-RB	20	i2-24o70-92i
PH560_11313	PH560_11313-RA	21	o
PH560_11313	PH560_11313-RB	21	o
PH560_11319	PH560_11319-RA	20	o4-21i41-63o78-100i
PH560_11319	PH560_11319-RB	20	o4-21i41-63o73-95i
PH560_11319	PH560_11319-RC	20	o4-21i41-63o68-90i
PH560_11320	PH560_11320-RA	20	i2-24o67-89i
PH560_11320	PH560_11320-RB	20	i2-24o70-92i
PH560_11336	PH560_11336-RA	20	o4-21i41-63o73-95i
PH560_11336	PH560_11336-RB	20	o4-21i41-63o68-90i
PH560_11336	PH560_11336-RC	20	o4-21i41-63o78-100i
PH560_11337	PH560_11337-RA	20	o4-21i41-63o78-100i
PH560_11337	PH560_11337-RB	20	o4-21i41-63o73-95i
PH560_11337	PH560_11337-RC	20	o4-21i41-63o68-90i
PH560_11355	PH560_11355-RA	23	o
PH560_11355	PH560_11355-RB	49	o
PH560_11373	PH560_11373-RA	20	o
PH560_11373	PH560_11373-RB	20	o
PH560_11393	PH560_11393-RA	19	o
PH560_11393	PH560_11393-RB	19	o
PH560_11403	PH560_11403-RA	19	o
PH560_11447	PH560_11447-RA	19	o
PH560_11466	PH560_11466-RC	23	o
PH560_11467	PH560_11467-RB	23	o
PH560_11501	PH560_11501-RA	27	i7-29o
PH560_11510	PH560_11510-RA	21	o
PH560_11511	PH560_11511-RB	19	i2-19o34-56i89-108o128-150i189-208o223-242i263-285o295-312i
PH560_11556	PH560_11556-RB	32	i12-31o
PH560_11556	PH560_11556-RC	32	i12-31o
PH560_11576	PH560_11576-RA	22	o
PH560_11577	PH560_11577-RC	16	o
PH560_11599	PH560_11599-RB	23	o
PH560_11599	PH560_11599-RD	23	o
PH560_11614	PH560_11614-RA	22	i5-24o
PH560_11624	PH560_11624-RE	19	o
PH560_11632	PH560_11632-RA	23	o177-199i211-233o
PH560_11633	PH560_11633-RA	36	o
PH560_11672	PH560_11672-RC	30	o
PH560_11678	PH560_11678-RA	22	o
PH560_11691	PH560_11691-RA	41	o
PH560_11699	PH560_11699-RA	25	o
PH560_11707	PH560_11707-RB	42	o
PH560_11707	PH560_11707-RD	27	i2-21o
PH560_11714	PH560_11714-RB	19	o
PH560_11728	PH560_11728-RC	23	i132-154o164-186i274-296o300-322i377-399o424-446i771-793o861-883i936-958o962-981i1045-1067o
PH560_11728	PH560_11728-RD	21	i7-24o86-108i161-183o187-206i270-292o
PH560_11739	PH560_11739-RA	31	i7-29o
PH560_11739	PH560_11739-RB	31	i7-29o
PH560_11739	PH560_11739-RC	31	i7-29o
PH560_11739	PH560_11739-RD	31	i7-29o
PH560_11741	PH560_11741-RD	27	o
PH560_11791	PH560_11791-RA	22	o
PH560_11801	PH560_11801-RC	17	o
PH560_11832	PH560_11832-RA	25	i7-24o
PH560_11836	PH560_11836-RA	25	i7-24o
PH560_11843	PH560_11843-RA	22	i9-26o
PH560_11856	PH560_11856-RB	19	o
PH560_11858	PH560_11858-RB	22	o
PH560_11863	PH560_11863-RA	38	o
PH560_11869	PH560_11869-RA	26	o
PH560_11869	PH560_11869-RB	26	o
PH560_11869	PH560_11869-RC	26	o
PH560_11879	PH560_11879-RC	20	o
PH560_11879	PH560_11879-RD	20	o
PH560_11879	PH560_11879-RF	20	o
PH560_11897	PH560_11897-RA	16	o
PH560_11911	PH560_11911-RG	51	o
PH560_11920	PH560_11920-RA	31	o
PH560_11925	PH560_11925-RA	23	o
PH560_11925	PH560_11925-RB	17	o
PH560_11929	PH560_11929-RA	24	o
PH560_11930	PH560_11930-RD	21	i5-22o42-64i69-91o138-160i210-232o279-301i333-355o370-392i399-421o445-467i513-532o547-569i582-604o
PH560_11930	PH560_11930-RE	21	i5-24o39-61i68-90o138-160i210-232o279-301i333-355o370-392i399-421o445-467i513-532o542-564i590-612o
PH560_11930	PH560_11930-RF	21	i5-22o42-64i69-91o138-160i210-232o279-301i333-355o370-392i399-421o445-467i513-532o542-564i
PH560_11950	PH560_11950-RB	22	i7-29o
PH560_11951	PH560_11951-RA	23	o
PH560_11958	PH560_11958-RA	28	o392-414i
PH560_11958	PH560_11958-RB	28	o417-439i
PH560_11963	PH560_11963-RA	26	o
PH560_11963	PH560_11963-RB	26	o
PH560_11969	PH560_11969-RA	31	o
PH560_11992	PH560_11992-RA	22	i9-31o51-73i80-102o122-144i
PH560_12013	PH560_12013-RB	20	i7-26o
PH560_12013	PH560_12013-RC	20	i7-26o
PH560_12013	PH560_12013-RF	20	i7-26o
PH560_12013	PH560_12013-RG	20	i7-26o
PH560_12013	PH560_12013-RH	20	i7-24o54-71i
PH560_12063	PH560_12063-RA	69	o
PH560_12067	PH560_12067-RA	21	o
PH560_12070	PH560_12070-RA	18	o
PH560_12070	PH560_12070-RB	18	o
PH560_12085	PH560_12085-RB	16	o
PH560_12137	PH560_12137-RA	16	o
PH560_12151	PH560_12151-RA	17	o49-71i84-106o110-132i144-166o
PH560_12166	PH560_12166-RA	23	o
PH560_12176	PH560_12176-RA	17	o
PH560_12196	PH560_12196-RB	24	o
PH560_12196	PH560_12196-RC	24	o
PH560_12207	PH560_12207-RA	18	o
PH560_12217	PH560_12217-RC	18	o
PH560_12221	PH560_12221-RA	29	i7-26o
PH560_12235	PH560_12235-RD	17	o
PH560_12239	PH560_12239-RA	24	o
PH560_12260	PH560_12260-RA	19	o4-23i35-57o
PH560_12281	PH560_12281-RB	22	o431-453i474-496o
PH560_12287	PH560_12287-RA	29	i7-24o
PH560_12299	PH560_12299-RB	17	o
PH560_12321	PH560_12321-RB	20	o
PH560_12339	PH560_12339-RA	19	o
PH560_12339	PH560_12339-RB	19	o
PH560_12382	PH560_12382-RB	20	i7-29o
PH560_12383	PH560_12383-RA	20	o
PH560_12386	PH560_12386-RB	25	o
PH560_12404	PH560_12404-RA	22	o
PH560_12404	PH560_12404-RD	22	o
PH560_12412	PH560_12412-RA	20	o
PH560_12413	PH560_12413-RA	20	o
PH560_12416	PH560_12416-RA	20	o
PH560_12417	PH560_12417-RA	20	o
PH560_12418	PH560_12418-RA	20	o
PH560_12422	PH560_12422-RA	22	o
PH560_12424	PH560_12424-RA	31	o
PH560_12426	PH560_12426-RA	31	o
PH560_12475	PH560_12475-RA	21	o
PH560_12502	PH560_12502-RA	19	o
PH560_12505	PH560_12505-RA	30	o
PH560_12505	PH560_12505-RB	30	o
PH560_12513	PH560_12513-RC	24	o
PH560_12513	PH560_12513-RF	24	o
PH560_12549	PH560_12549-RA	17	o
PH560_12575	PH560_12575-RA	19	o
PH560_12580	PH560_12580-RA	20	o
PH560_12580	PH560_12580-RB	20	o
PH560_12580	PH560_12580-RC	20	o
PH560_12580	PH560_12580-RD	20	o
PH560_12580	PH560_12580-RE	20	o
PH560_12580	PH560_12580-RF	20	o
PH560_12583	PH560_12583-RA	20	o
PH560_12584	PH560_12584-RA	21	o
PH560_12584	PH560_12584-RB	21	o
PH560_12584	PH560_12584-RC	21	o
PH560_12584	PH560_12584-RD	21	o
PH560_12584	PH560_12584-RE	21	o
PH560_12585	PH560_12585-RA	21	o
PH560_12585	PH560_12585-RB	21	o
PH560_12585	PH560_12585-RC	21	o
PH560_12585	PH560_12585-RD	21	o
PH560_12585	PH560_12585-RE	21	o
PH560_12589	PH560_12589-RC	18	o
PH560_12591	PH560_12591-RA	18	o
PH560_12592	PH560_12592-RA	21	o
PH560_12592	PH560_12592-RB	21	o
PH560_12592	PH560_12592-RC	21	o
PH560_12592	PH560_12592-RD	21	o
PH560_12592	PH560_12592-RE	21	o
PH560_12592	PH560_12592-RF	21	o
PH560_12592	PH560_12592-RG	21	o
PH560_12592	PH560_12592-RH	21	o
PH560_12592	PH560_12592-RI	21	o
PH560_12593	PH560_12593-RA	22	o
PH560_12593	PH560_12593-RB	22	o
PH560_12593	PH560_12593-RC	22	o
PH560_12598	PH560_12598-RE	27	o
PH560_12611	PH560_12611-RA	20	o
PH560_12614	PH560_12614-RA	20	o224-246i
PH560_12616	PH560_12616-RA	21	o
PH560_12620	PH560_12620-RB	25	o
PH560_12627	PH560_12627-RA	27	i7-29o
PH560_12642	PH560_12642-RA	21	o
PH560_12656	PH560_12656-RA	27	o
PH560_12664	PH560_12664-RA	16	o
PH560_12668	PH560_12668-RA	22	o
PH560_12668	PH560_12668-RB	21	o
PH560_12685	PH560_12685-RJ	22	o
PH560_12695	PH560_12695-RA	24	i7-26o92-114i121-143o147-169i189-208o228-250i
PH560_12720	PH560_12720-RA	24	o
PH560_12720	PH560_12720-RB	24	o
PH560_12801	PH560_12801-RB	20	o
PH560_12805	PH560_12805-RA	22	o
PH560_12805	PH560_12805-RB	22	o
PH560_12805	PH560_12805-RC	22	o
PH560_12806	PH560_12806-RA	33	i170-192o
PH560_12815	PH560_12815-RC	25	o
PH560_12848	PH560_12848-RA	20	o
PH560_12854	PH560_12854-RA	19	o
PH560_12854	PH560_12854-RB	19	o
PH560_12854	PH560_12854-RC	19	o
PH560_12865	PH560_12865-RD	30	o
PH560_12867	PH560_12867-RA	25	o
PH560_12918	PH560_12918-RA	20	i7-29o57-79i92-114o129-151i164-186o228-250i270-292o312-334i355-377o
PH560_12919	PH560_12919-RC	36	o
PH560_12921	PH560_12921-RA	19	o182-204i
PH560_12947	PH560_12947-RA	16	o
PH560_12994	PH560_12994-RC	18	o
PH560_13004	PH560_13004-RA	22	i
PH560_13010	PH560_13010-RA	27	o
PH560_13017	PH560_13017-RB	20	o
PH560_13026	PH560_13026-RA	27	o
PH560_13039	PH560_13039-RD	28	i7-24o
PH560_13043	PH560_13043-RA	20	o
PH560_13101	PH560_13101-RA	22	i9-31o51-73i80-102o122-144i
PH560_13128	PH560_13128-RA	27	i7-29o
PH560_13136	PH560_13136-RA	30	i185-207o
PH560_13169	PH560_13169-RA	28	i7-26o935-954i
PH560_13203	PH560_13203-RA	21	o
PH560_13211	PH560_13211-RA	40	o
PH560_13211	PH560_13211-RF	40	o
PH560_13220	PH560_13220-RA	29	o
PH560_13232	PH560_13232-RB	19	o
PH560_13243	PH560_13243-RA	20	o
PH560_13243	PH560_13243-RB	20	o
PH560_13245	PH560_13245-RA	20	o
PH560_13251	PH560_13251-RA	16	o
PH560_13262	PH560_13262-RA	17	o
PH560_13301	PH560_13301-RA	20	o4-23i59-81o114-136i
PH560_13302	PH560_13302-RA	20	i2-24o59-81i
PH560_13310	PH560_13310-RA	23	i7-29o81-103i
PH560_13310	PH560_13310-RB	23	o5-27i40-62o72-94i
PH560_13311	PH560_13311-RF	24	o4-26i274-296o
PH560_13311	PH560_13311-RG	24	o4-26i274-296o
PH560_13311	PH560_13311-RH	24	o4-26i274-296o
PH560_13317	PH560_13317-RA	37	o
PH560_13325	PH560_13325-RC	21	o
PH560_13331	PH560_13331-RB	21	o4-23i36-58o68-90i
PH560_13331	PH560_13331-RC	21	o4-23i36-58o68-90i
PH560_13331	PH560_13331-RD	21	o4-23i36-58o68-90i
PH560_13348	PH560_13348-RA	18	o
PH560_13362	PH560_13362-RJ	18	o
PH560_13364	PH560_13364-RA	19	o
PH560_13364	PH560_13364-RB	19	o
PH560_13367	PH560_13367-RA	21	o
PH560_13367	PH560_13367-RB	21	o
PH560_13367	PH560_13367-RD	21	i34-53o63-85i
PH560_13378	PH560_13378-RA	27	o
PH560_13386	PH560_13386-RA	16	o
PH560_13388	PH560_13388-RA	34	o801-823i
PH560_13411	PH560_13411-RC	20	o
PH560_13413	PH560_13413-RA	21	o
PH560_13413	PH560_13413-RB	21	o
PH560_13423	PH560_13423-RA	22	o
PH560_13425	PH560_13425-RA	20	o
PH560_13433	PH560_13433-RB	21	i5-27o52-74i95-117o151-173i
PH560_13439	PH560_13439-RA	25	o
PH560_13439	PH560_13439-RB	25	o
PH560_13441	PH560_13441-RA	19	o
PH560_13460	PH560_13460-RL	18	o
PH560_13464	PH560_13464-RA	22	o
PH560_13464	PH560_13464-RB	22	o
PH560_13465	PH560_13465-RA	20	o
PH560_13465	PH560_13465-RB	20	o
PH560_13470	PH560_13470-RB	26	o
PH560_13476	PH560_13476-RA	20	i5-22o32-54i67-86o101-123i167-189o250-272i279-301o311-333i340-359o
PH560_13488	PH560_13488-RB	29	i2-24o74-96i117-134o
PH560_13501	PH560_13501-RA	29	i2-24o74-96i117-134o
PH560_13521	PH560_13521-RA	26	i5-23o
PH560_13540	PH560_13540-RA	21	i7-24o44-66i
PH560_13541	PH560_13541-RA	21	o
PH560_13542	PH560_13542-RA	21	o
PH560_13548	PH560_13548-RB	24	i2-21o46-68i148-170o
PH560_13567	PH560_13567-RA	23	o
PH560_13569	PH560_13569-RA	21	o
PH560_13569	PH560_13569-RB	21	i35-54o64-86i
PH560_13569	PH560_13569-RC	21	i35-54o64-86i
PH560_13569	PH560_13569-RD	21	o
PH560_13586	PH560_13586-RA	21	o
PH560_13586	PH560_13586-RB	21	o
PH560_13586	PH560_13586-RC	21	o
PH560_13586	PH560_13586-RD	21	o
PH560_13643	PH560_13643-RB	18	o
PH560_13666	PH560_13666-RB	26	o
PH560_13675	PH560_13675-RC	19	i3-20o40-62i
PH560_13683	PH560_13683-RA	21	o
PH560_13697	PH560_13697-RB	19	o
PH560_13700	PH560_13700-RB	19	o
PH560_13700	PH560_13700-RC	19	o
PH560_13701	PH560_13701-RA	24	i7-25o
PH560_13710	PH560_13710-RC	16	o
PH560_13784	PH560_13784-RC	22	o
PH560_13785	PH560_13785-RA	16	o
PH560_13816	PH560_13816-RA	21	o
PH560_13820	PH560_13820-RA	23	o
PH560_13820	PH560_13820-RB	23	o
PH560_13826	PH560_13826-RA	21	o
PH560_13826	PH560_13826-RB	21	o
PH560_13826	PH560_13826-RC	21	o
PH560_13831	PH560_13831-RA	18	o
PH560_13834	PH560_13834-RB	28	i2-24o44-66i73-92o145-167i188-210o225-247i254-276o291-313i
PH560_13838	PH560_13838-RE	21	o
PH560_13845	PH560_13845-RA	31	o
PH560_13848	PH560_13848-RA	30	o
PH560_13850	PH560_13850-RA	22	o
PH560_13887	PH560_13887-RA	28	i9-31o
PH560_13889	PH560_13889-RA	24	o
PH560_13901	PH560_13901-RC	17	o
PH560_13916	PH560_13916-RC	30	o
PH560_13919	PH560_13919-RA	25	o
PH560_13919	PH560_13919-RB	25	o
PH560_13920	PH560_13920-RA	31	i322-344o
PH560_13921	PH560_13921-RA	25	o
PH560_13989	PH560_13989-RA	16	o
PH560_14018	PH560_14018-RA	28	i13-35o
PH560_14023	PH560_14023-RJ	41	o
PH560_14031	PH560_14031-RA	16	o
PH560_14031	PH560_14031-RB	16	o
PH560_14034	PH560_14034-RA	21	o
PH560_14043	PH560_14043-RA	28	o4-23i
PH560_14066	PH560_14066-RA	27	o
PH560_14066	PH560_14066-RB	27	o
PH560_14089	PH560_14089-RB	25	o
PH560_14106	PH560_14106-RA	22	o
PH560_14106	PH560_14106-RB	22	o
PH560_14141	PH560_14141-RD	25	o
PH560_14164	PH560_14164-RA	22	o
PH560_14164	PH560_14164-RD	22	o
PH560_14169	PH560_14169-RA	22	o
PH560_14187	PH560_14187-RB	36	o
PH560_14187	PH560_14187-RC	36	o
PH560_14195	PH560_14195-RA	26	i
PH560_14241	PH560_14241-RA	23	i7-26o
PH560_14241	PH560_14241-RB	23	i7-26o
PH560_14241	PH560_14241-RC	23	i7-26o
PH560_14245	PH560_14245-RA	27	o
PH560_14271	PH560_14271-RA	22	o
PH560_14341	PH560_14341-RA	23	o
PH560_14368	PH560_14368-RA	32	i13-35o
PH560_14392	PH560_14392-RA	20	o
PH560_14392	PH560_14392-RB	20	o
PH560_14397	PH560_14397-RA	26	o
PH560_14397	PH560_14397-RB	26	o
PH560_14397	PH560_14397-RD	26	o
PH560_14397	PH560_14397-RE	26	o
PH560_14397	PH560_14397-RF	26	o
PH560_14397	PH560_14397-RG	26	o
PH560_14397	PH560_14397-RH	26	o
PH560_14397	PH560_14397-RI	26	o
PH560_14397	PH560_14397-RJ	26	o
PH560_14397	PH560_14397-RK	26	o
PH560_14397	PH560_14397-RL	26	o
PH560_14404	PH560_14404-RA	21	o
PH560_14406	PH560_14406-RA	21	o
PH560_14452	PH560_14452-RA	27	o
PH560_14463	PH560_14463-RA	94	i13-35o77-99i135-154o164-186i199-221o
PH560_14482	PH560_14482-RA	24	o
PH560_14485	PH560_14485-RA	31	i11-33o1065-1087i1294-1316o
PH560_14485	PH560_14485-RB	31	i11-33o1092-1114i1321-1343o
PH560_14485	PH560_14485-RC	31	i11-33o1082-1104i1311-1333o
PH560_14544	PH560_14544-RA	29	i2-24o74-96i117-134o
PH560_14567	PH560_14567-RA	30	o
PH560_14573	PH560_14573-RD	21	o
PH560_14573	PH560_14573-RE	21	o
PH560_14584	PH560_14584-RA	47	o
PH560_14584	PH560_14584-RB	47	o
PH560_14619	PH560_14619-RB	16	o
PH560_14619	PH560_14619-RC	16	o
PH560_14625	PH560_14625-RA	24	i7-26o
PH560_14625	PH560_14625-RB	24	i7-26o
PH560_14635	PH560_14635-RA	27	o
PH560_14639	PH560_14639-RA	24	o
PH560_14643	PH560_14643-RE	30	o
PH560_14643	PH560_14643-RF	30	o
PH560_14649	PH560_14649-RA	16	o
PH560_14653	PH560_14653-RA	20	o534-553i
PH560_14654	PH560_14654-RA	23	i7-24o49-71i178-200o205-224i233-252o
PH560_14654	PH560_14654-RB	23	i7-24o49-71i178-200o205-224i233-252o276-298i318-340o365-387i421-443o
PH560_14705	PH560_14705-RA	19	o
PH560_14705	PH560_14705-RB	19	o
PH560_14734	PH560_14734-RA	22	o
PH560_14734	PH560_14734-RB	22	o
PH560_14756	PH560_14756-RA	16	o
PH560_14766	PH560_14766-RA	26	o
PH560_14774	PH560_14774-RA	21	o
PH560_14783	PH560_14783-RA	26	o
PH560_14784	PH560_14784-RA	20	o
PH560_14798	PH560_14798-RD	27	o
PH560_14831	PH560_14831-RA	16	o
PH560_14847	PH560_14847-RC	19	o
PH560_14856	PH560_14856-RA	16	o
PH560_14881	PH560_14881-RA	27	o
PH560_14883	PH560_14883-RH	29	o
PH560_14883	PH560_14883-RI	29	o
PH560_14883	PH560_14883-RM	20	o
PH560_14883	PH560_14883-RN	20	o
PH560_14899	PH560_14899-RB	20	o
PH560_14903	PH560_14903-RA	57	o
PH560_14911	PH560_14911-RB	36	o
PH560_14911	PH560_14911-RC	36	o
PH560_14931	PH560_14931-RB	28	o
PH560_14941	PH560_14941-RB	19	o
PH560_14967	PH560_14967-RA	30	o
PH560_14971	PH560_14971-RA	20	o559-581i
PH560_15003	PH560_15003-RA	29	o10-32i
PH560_15010	PH560_15010-RA	18	o
PH560_15010	PH560_15010-RB	18	o
PH560_15010	PH560_15010-RC	18	o
PH560_15010	PH560_15010-RD	18	o
PH560_15010	PH560_15010-RE	18	o
PH560_15014	PH560_15014-RA	40	o
PH560_15014	PH560_15014-RB	39	o
PH560_15020	PH560_15020-RA	22	o
PH560_15020	PH560_15020-RB	22	o174-196i
PH560_15040	PH560_15040-RB	17	o
PH560_15042	PH560_15042-RC	24	o
PH560_15044	PH560_15044-RA	24	o
PH560_15050	PH560_15050-RA	21	o
PH560_15050	PH560_15050-RB	21	o
PH560_15072	PH560_15072-RB	20	o
PH560_15072	PH560_15072-RC	20	o
PH560_15072	PH560_15072-RF	20	o
PH560_15072	PH560_15072-RG	20	o
PH560_15072	PH560_15072-RH	20	o
PH560_15072	PH560_15072-RJ	20	o
PH560_15108	PH560_15108-RA	25	o
PH560_15118	PH560_15118-RA	20	o
PH560_15157	PH560_15157-RA	16	o
PH560_15162	PH560_15162-RA	27	o
PH560_15162	PH560_15162-RB	27	o
PH560_15187	PH560_15187-RE	18	o
PH560_15187	PH560_15187-RF	18	o
PH560_15211	PH560_15211-RA	31	o
PH560_15211	PH560_15211-RB	31	o
PH560_15219	PH560_15219-RA	29	o
PH560_15221	PH560_15221-RB	21	o4-23i36-58o68-90i
PH560_15221	PH560_15221-RD	21	o4-23i36-58o68-90i
PH560_15227	PH560_15227-RA	30	i183-205o
PH560_15227	PH560_15227-RB	31	i184-206o
PH560_15248	PH560_15248-RB	21	o4-23i35-54o69-91i
PH560_15248	PH560_15248-RD	21	o4-23i35-54o69-91i
PH560_15248	PH560_15248-RE	21	o4-23i35-54o69-91i
PH560_15252	PH560_15252-RE	24	o
PH560_15261	PH560_15261-RA	36	o
PH560_15267	PH560_15267-RA	21	i2-24o
PH560_15267	PH560_15267-RB	22	i2-24o
PH560_15296	PH560_15296-RA	26	o
PH560_15296	PH560_15296-RB	26	o
PH560_15308	PH560_15308-RA	19	o
PH560_15312	PH560_15312-RA	30	o5-27i80-102o125-147i
PH560_15312	PH560_15312-RB	30	o5-27i87-109o132-154i166-185o200-219i232-254o289-311i316-338o342-364i419-437o447-469i
PH560_15312	PH560_15312-RE	22	i21-43o48-70i125-143o153-175i
PH560_15336	PH560_15336-RB	22	o
PH560_15336	PH560_15336-RC	22	o
PH560_15337	PH560_15337-RA	22	o
PH560_15341	PH560_15341-RA	24	o
PH560_15353	PH560_15353-RB	21	o
PH560_15356	PH560_15356-RB	24	o
PH560_15377	PH560_15377-RA	32	o469-491i
PH560_15377	PH560_15377-RB	32	o
PH560_15432	PH560_15432-RA	16	o
PH560_15453	PH560_15453-RB	21	i177-199o214-236i273-292o307-324i379-401o
PH560_15486	PH560_15486-RA	16	o
PH560_15505	PH560_15505-RA	21	o
PH560_15512	PH560_15512-RA	23	o
PH560_15552	PH560_15552-RA	16	o
PH560_15554	PH560_15554-RA	22	o4-26i
PH560_15559	PH560_15559-RA	16	o
PH560_15559	PH560_15559-RB	16	o
PH560_15566	PH560_15566-RA	28	o4-21i
PH560_15568	PH560_15568-RA	28	o4-21i
PH560_15571	PH560_15571-RB	20	o
PH560_15593	PH560_15593-RB	19	o
PH560_15593	PH560_15593-RC	19	o
PH560_15615	PH560_15615-RA	24	o
PH560_15620	PH560_15620-RA	52	o215-234i
PH560_15620	PH560_15620-RB	52	o183-202i
PH560_15620	PH560_15620-RC	52	o210-229i
PH560_15629	PH560_15629-RA	28	o
PH560_15657	PH560_15657-RB	26	i197-219o286-305i312-334o344-361i374-396o411-428i
PH560_15657	PH560_15657-RE	26	o206-228i380-402o
PH560_15657	PH560_15657-RG	26	o
PH560_15657	PH560_15657-RH	26	o
PH560_15658	PH560_15658-RA	27	o
PH560_15660	PH560_15660-RC	27	i7-26o37-59i71-90o110-132i168-185o205-227i319-341o382-404i416-435o
PH560_15660	PH560_15660-RD	27	o373-395i407-426o
PH560_15660	PH560_15660-RG	27	o
PH560_15671	PH560_15671-RA	16	o
PH560_15692	PH560_15692-RB	22	o163-185i192-214o224-246i253-275o290-312i
PH560_15694	PH560_15694-RD	23	o
PH560_15696	PH560_15696-RB	21	o
PH560_15721	PH560_15721-RA	16	o
PH560_15738	PH560_15738-RD	27	o
PH560_15765	PH560_15765-RA	23	o161-183i
PH560_15766	PH560_15766-RA	22	o
PH560_15766	PH560_15766-RB	22	o
PH560_15778	PH560_15778-RE	19	o
PH560_15780	PH560_15780-RC	19	o
PH560_15780	PH560_15780-RD	19	o
PH560_15780	PH560_15780-RE	19	o
PH560_15853	PH560_15853-RC	24	i5-27o
PH560_15887	PH560_15887-RA	22	o
PH560_15887	PH560_15887-RB	22	o
PH560_15905	PH560_15905-RD	21	i28-50o65-87i100-119o124-146i
PH560_15907	PH560_15907-RA	25	o
PH560_15912	PH560_15912-RD	21	o
PH560_15953	PH560_15953-RA	39	i21-40o60-82i
PH560_15955	PH560_15955-RC	25	o
PH560_15955	PH560_15955-RD	25	o
PH560_15964	PH560_15964-RB	25	o
PH560_15964	PH560_15964-RC	25	o
PH560_15996	PH560_15996-RB	18	o
PH560_16003	PH560_16003-RA	20	o
PH560_16006	PH560_16006-RC	17	o
PH560_16036	PH560_16036-RA	27	i5-27o
PH560_16049	PH560_16049-RA	22	o
PH560_16080	PH560_16080-RA	27	i7-29o
PH560_16084	PH560_16084-RA	30	i185-207o
PH560_16104	PH560_16104-RB	16	o
PH560_16104	PH560_16104-RC	16	o
PH560_16138	PH560_16138-RA	31	i7-29o
PH560_16140	PH560_16140-RC	25	o
PH560_16140	PH560_16140-RE	23	o
PH560_16143	PH560_16143-RA	22	o
PH560_16143	PH560_16143-RB	22	o
PH560_16151	PH560_16151-RA	32	o469-491i
PH560_16151	PH560_16151-RB	32	o
PH560_16159	PH560_16159-RC	28	o
PH560_16184	PH560_16184-RA	24	o6-28i
PH560_16197	PH560_16197-RA	41	i21-40o799-821i
PH560_16198	PH560_16198-RB	24	o
PH560_16199	PH560_16199-RA	18	o
PH560_16210	PH560_16210-RA	20	o
PH560_16210	PH560_16210-RB	20	o
PH560_16216	PH560_16216-RA	23	o
PH560_16234	PH560_16234-RA	18	o
PH560_16240	PH560_16240-RA	20	i2-24o67-89i
PH560_16240	PH560_16240-RB	20	i2-24o64-86i
PH560_16241	PH560_16241-RA	20	i2-24o71-93i
PH560_16241	PH560_16241-RB	20	i3-25o40-62i67-89o
PH560_16275	PH560_16275-RA	23	o
PH560_16275	PH560_16275-RB	23	o
PH560_16276	PH560_16276-RA	21	o4-21i
PH560_16276	PH560_16276-RB	21	o
PH560_16276	PH560_16276-RC	21	o
PH560_16295	PH560_16295-RA	16	o
PH560_16343	PH560_16343-RA	23	i7-26o
PH560_16372	PH560_16372-RA	46	o
PH560_16372	PH560_16372-RB	46	o
PH560_16379	PH560_16379-RK	36	o
PH560_16385	PH560_16385-RC	24	o5-24i
PH560_16409	PH560_16409-RA	28	i171-193o208-226i
PH560_16410	PH560_16410-RA	28	i171-193o208-226i
PH560_16413	PH560_16413-RG	18	o
PH560_16414	PH560_16414-RA	16	o
PH560_16480	PH560_16480-RA	26	o
PH560_16480	PH560_16480-RB	26	o
PH560_16480	PH560_16480-RC	26	o
PH560_16480	PH560_16480-RD	26	o
PH560_16480	PH560_16480-RE	26	o
PH560_16495	PH560_16495-RE	30	i7-29o
PH560_16502	PH560_16502-RA	21	o
PH560_16502	PH560_16502-RB	21	o
PH560_16502	PH560_16502-RC	21	o
PH560_16502	PH560_16502-RE	21	o
PH560_16502	PH560_16502-RF	21	o
PH560_16569	PH560_16569-RA	32	i13-32o
PH560_16569	PH560_16569-RB	32	i13-32o
PH560_16578	PH560_16578-RA	41	i13-35o491-513i
PH560_16612	PH560_16612-RC	17	o
PH560_16616	PH560_16616-RA	50	o
PH560_16626	PH560_16626-RA	20	o
PH560_16626	PH560_16626-RB	20	o
PH560_16663	PH560_16663-RC	27	i2-24o
PH560_16735	PH560_16735-RA	25	o
PH560_16735	PH560_16735-RB	26	o
PH560_16737	PH560_16737-RB	23	o
PH560_16750	PH560_16750-RA	20	o
PH560_16750	PH560_16750-RB	19	o
PH560_16763	PH560_16763-RB	22	o
PH560_16764	PH560_16764-RA	29	o
PH560_16781	PH560_16781-RA	22	o
PH560_16785	PH560_16785-RA	23	o66-88i
PH560_16798	PH560_16798-RA	21	o
PH560_16798	PH560_16798-RB	21	o
PH560_16801	PH560_16801-RA	22	o
PH560_16812	PH560_16812-RA	22	o
PH560_16834	PH560_16834-RA	30	o
PH560_16834	PH560_16834-RB	30	o
PH560_16841	PH560_16841-RA	21	o5-24i
PH560_16841	PH560_16841-RC	21	o5-24i
PH560_16850	PH560_16850-RA	23	i5-27o
PH560_16857	PH560_16857-RA	24	o
PH560_16867	PH560_16867-RA	38	o
PH560_16884	PH560_16884-RB	21	i177-199o214-236i273-292o307-324i379-401o
PH560_16936	PH560_16936-RA	27	i7-29o
PH560_16959	PH560_16959-RA	16	o
PH560_17005	PH560_17005-RD	22	o492-514i526-548o628-650i1055-1077o1106-1128i1149-1171o1176-1198i1203-1225o1352-1374i
PH560_17006	PH560_17006-RA	22	o
PH560_17011	PH560_17011-RA	23	i7-29o
PH560_17012	PH560_17012-RB	91	o
PH560_17015	PH560_17015-RA	91	o
PH560_17022	PH560_17022-RA	30	o
PH560_17059	PH560_17059-RA	20	o
PH560_17060	PH560_17060-RD	25	o
PH560_17060	PH560_17060-RE	25	o
PH560_17060	PH560_17060-RF	25	o
PH560_17076	PH560_17076-RA	21	o
PH560_17103	PH560_17103-RA	21	o
PH560_17110	PH560_17110-RA	20	o
PH560_17110	PH560_17110-RB	20	o
PH560_17111	PH560_17111-RA	26	o
PH560_17130	PH560_17130-RE	30	o
PH560_17130	PH560_17130-RF	30	o
PH560_17134	PH560_17134-RA	16	o
PH560_17134	PH560_17134-RB	16	o
PH560_17144	PH560_17144-RA	30	o
PH560_17144	PH560_17144-RB	30	o
PH560_17145	PH560_17145-RA	28	o
PH560_17148	PH560_17148-RA	22	o
PH560_17148	PH560_17148-RB	22	i158-180o
PH560_17153	PH560_17153-RA	41	o
PH560_17166	PH560_17166-RA	25	o
PH560_17166	PH560_17166-RB	25	o
PH560_17185	PH560_17185-RB	21	o
PH560_17191	PH560_17191-RA	24	o
PH560_17198	PH560_17198-RA	16	o
PH560_17198	PH560_17198-RB	16	o
PH560_17200	PH560_17200-RA	23	i5-27o
PH560_17211	PH560_17211-RE	29	o
PH560_17211	PH560_17211-RF	29	o
PH560_17217	PH560_17217-RA	21	o
PH560_17230	PH560_17230-RA	29	o
PH560_17248	PH560_17248-RA	28	i7-25o
PH560_17248	PH560_17248-RB	28	o10-32i
PH560_17253	PH560_17253-RA	23	o
PH560_17300	PH560_17300-RA	25	o
PH560_17305	PH560_17305-RA	24	o
PH560_17305	PH560_17305-RB	24	o
PH560_17305	PH560_17305-RD	23	o
PH560_17305	PH560_17305-RE	24	o
PH560_17305	PH560_17305-RG	23	o
PH560_17308	PH560_17308-RA	24	o
PH560_17308	PH560_17308-RB	24	o
PH560_17324	PH560_17324-RA	32	i178-200o395-417i437-459o469-491i515-532o542-564i571-590o605-627i
PH560_17324	PH560_17324-RB	32	i178-200o395-417i437-459o469-491i515-532o542-564i571-590o605-627i
PH560_17327	PH560_17327-RE	21	o
PH560_17369	PH560_17369-RA	21	o
PH560_17394	PH560_17394-RA	24	o13-35i
PH560_17394	PH560_17394-RB	24	o
PH560_17404	PH560_17404-RA	23	o
PH560_17409	PH560_17409-RA	21	o
PH560_17409	PH560_17409-RB	21	o
PH560_17409	PH560_17409-RC	21	o
PH560_17412	PH560_17412-RA	23	o
PH560_17412	PH560_17412-RB	23	o
PH560_17419	PH560_17419-RA	33	o
PH560_17419	PH560_17419-RB	33	o
PH560_17421	PH560_17421-RA	21	o
PH560_17421	PH560_17421-RB	23	o
PH560_17421	PH560_17421-RC	23	o
PH560_17421	PH560_17421-RD	23	o
PH560_17434	PH560_17434-RA	20	o
PH560_17434	PH560_17434-RB	20	o
PH560_17435	PH560_17435-RA	18	o
PH560_17447	PH560_17447-RA	20	o
PH560_17451	PH560_17451-RD	19	o
PH560_17498	PH560_17498-RB	18	o
PH560_17569	PH560_17569-RA	20	i2-24o68-90i
PH560_17570	PH560_17570-RA	20	o5-27i40-62o72-94i
PH560_17574	PH560_17574-RB	21	o
PH560_17574	PH560_17574-RC	21	o
PH560_17663	PH560_17663-RB	17	o
PH560_17667	PH560_17667-RA	22	o
PH560_17685	PH560_17685-RA	16	o
PH560_17696	PH560_17696-RA	21	i5-27o42-64i
PH560_17698	PH560_17698-RA	16	o
PH560_17698	PH560_17698-RB	16	o
PH560_17711	PH560_17711-RA	21	i141-163o178-200i207-229o
PH560_17711	PH560_17711-RB	21	i176-198o
PH560_17713	PH560_17713-RC	16	o
PH560_17727	PH560_17727-RB	20	o
PH560_17734	PH560_17734-RK	20	o
PH560_17755	PH560_17755-RB	70	o6-28i41-63o129-148i153-175o
PH560_17786	PH560_17786-RC	25	i7-29o
PH560_17787	PH560_17787-RA	25	i7-29o
PH560_17793	PH560_17793-RA	20	i
PH560_17801	PH560_17801-RA	22	o
PH560_17821	PH560_17821-RA	31	o
PH560_17821	PH560_17821-RB	31	o
PH560_17827	PH560_17827-RE	20	o
PH560_17834	PH560_17834-RA	30	i
PH560_17865	PH560_17865-RA	20	o4-26i
PH560_17865	PH560_17865-RB	20	o4-26i
PH560_17865	PH560_17865-RC	20	o
PH560_17865	PH560_17865-RD	20	o
PH560_17865	PH560_17865-RE	20	o
PH560_17865	PH560_17865-RF	20	o
PH560_17890	PH560_17890-RA	16	o
PH560_17890	PH560_17890-RB	16	o
PH560_17897	PH560_17897-RA	21	o
PH560_17897	PH560_17897-RB	21	o
PH560_17905	PH560_17905-RA	30	o
PH560_17933	PH560_17933-RA	24	i5-27o
PH560_17942	PH560_17942-RA	16	o
PH560_17956	PH560_17956-RB	36	o15-33i206-228o
PH560_17956	PH560_17956-RE	36	o
PH560_17959	PH560_17959-RA	34	o13-30i203-225o
PH560_17962	PH560_17962-RH	18	o
PH560_17962	PH560_17962-RI	18	o
PH560_17962	PH560_17962-RJ	18	o
PH560_17966	PH560_17966-RA	19	o
PH560_17966	PH560_17966-RB	19	o
PH560_17966	PH560_17966-RC	19	o
PH560_17970	PH560_17970-RD	20	o
PH560_17973	PH560_17973-RA	27	i7-29o
PH560_17978	PH560_17978-RB	24	o
PH560_18000	PH560_18000-RA	26	o4-26i
PH560_18004	PH560_18004-RA	20	o
PH560_18022	PH560_18022-RA	32	i13-32o42-64i
PH560_18031	PH560_18031-RA	22	o470-489i
PH560_18031	PH560_18031-RB	31	o479-498i
PH560_18038	PH560_18038-RA	26	o
PH560_18041	PH560_18041-RA	20	o4-23i43-62o77-99i
PH560_18052	PH560_18052-RA	25	o
PH560_18092	PH560_18092-RA	20	o
PH560_18127	PH560_18127-RB	19	o
PH560_18146	PH560_18146-RB	21	i5-27o
PH560_18160	PH560_18160-RA	20	o
PH560_18160	PH560_18160-RB	20	o
PH560_18171	PH560_18171-RA	20	o568-590i
PH560_18178	PH560_18178-RC	30	o
PH560_18195	PH560_18195-RA	20	o
PH560_18207	PH560_18207-RA	20	o
PH560_18207	PH560_18207-RB	20	o
PH560_18220	PH560_18220-RA	21	o
PH560_18222	PH560_18222-RA	33	o
PH560_18239	PH560_18239-RA	25	o
PH560_18240	PH560_18240-RA	34	i7-26o
PH560_18240	PH560_18240-RB	18	o
PH560_18244	PH560_18244-RA	34	i7-24o
PH560_18257	PH560_18257-RA	19	o
PH560_18289	PH560_18289-RB	49	o
PH560_18289	PH560_18289-RC	49	o
PH560_18295	PH560_18295-RA	49	o
PH560_18295	PH560_18295-RB	49	o
PH560_18345	PH560_18345-RB	27	i7-24o
PH560_18362	PH560_18362-RA	21	o
PH560_18378	PH560_18378-RA	21	o
PH560_18406	PH560_18406-RD	46	i11-33o
PH560_18416	PH560_18416-RA	35	o
PH560_18416	PH560_18416-RB	35	o
PH560_18417	PH560_18417-RA	23	o
PH560_18417	PH560_18417-RB	23	o
PH560_18418	PH560_18418-RA	23	o
PH560_18418	PH560_18418-RB	23	o
PH560_18419	PH560_18419-RA	26	o
PH560_18425	PH560_18425-RA	22	o
PH560_18425	PH560_18425-RB	22	o
PH560_18439	PH560_18439-RA	25	o
PH560_18446	PH560_18446-RE	20	o
PH560_18446	PH560_18446-RF	20	o
PH560_18456	PH560_18456-RA	17	o
PH560_18456	PH560_18456-RB	17	o
PH560_18475	PH560_18475-RB	91	o
PH560_18478	PH560_18478-RA	91	o
PH560_18481	PH560_18481-RA	23	i7-29o
PH560_18483	PH560_18483-RA	22	o
PH560_18484	PH560_18484-RA	22	o492-514i526-548o628-650i1055-1077o1106-1128i1149-1171o1176-1198i1203-1225o1352-1374i
PH560_18495	PH560_18495-RA	19	o
PH560_18503	PH560_18503-RB	19	o
PH560_18519	PH560_18519-RA	31	o
PH560_18538	PH560_18538-RA	28	o
PH560_18585	PH560_18585-RF	25	i2-24o84-106i
PH560_18612	PH560_18612-RA	28	i
PH560_18613	PH560_18613-RA	19	o
PH560_18614	PH560_18614-RA	24	i119-141o156-178i
PH560_18618	PH560_18618-RA	24	o
PH560_18620	PH560_18620-RA	26	o
PH560_18629	PH560_18629-RA	23	o
PH560_18639	PH560_18639-RA	24	o4-26i93-111o126-148i
PH560_18658	PH560_18658-RD	23	o
PH560_18658	PH560_18658-RF	23	o
PH560_18675	PH560_18675-RA	26	i12-31o85-107i159-178o251-273i294-311o326-343i
PH560_18675	PH560_18675-RB	26	i12-31o85-107i141-163o238-260i281-298o313-330i
PH560_18675	PH560_18675-RC	26	i12-31o85-107i139-161o229-251i272-289o304-321i
PH560_18682	PH560_18682-RA	27	o
PH560_18695	PH560_18695-RA	30	o315-337i
PH560_18730	PH560_18730-RB	25	i5-27o555-577i711-733o
PH560_18754	PH560_18754-RA	21	o4-23i104-126o130-152i159-176o191-213i220-242o262-284i291-313o318-340i
PH560_18777	PH560_18777-RA	26	o812-834i
PH560_18777	PH560_18777-RB	26	o
PH560_18785	PH560_18785-RA	22	o
PH560_18794	PH560_18794-RA	20	o
PH560_18795	PH560_18795-RA	20	o
PH560_18796	PH560_18796-RA	20	o
PH560_18812	PH560_18812-RA	17	o
PH560_18812	PH560_18812-RB	17	o
PH560_18816	PH560_18816-RB	20	o
PH560_18817	PH560_18817-RA	20	i2-24o59-81i
PH560_18821	PH560_18821-RA	20	i2-24o59-81i
PH560_18822	PH560_18822-RA	20	i2-24o58-80i
PH560_18832	PH560_18832-RF	24	o4-26i274-296o
PH560_18832	PH560_18832-RG	24	o4-26i274-296o
PH560_18832	PH560_18832-RH	24	o4-26i274-296o
PH560_18846	PH560_18846-RA	18	o
PH560_18871	PH560_18871-RA	20	o
PH560_18871	PH560_18871-RB	20	o
PH560_18877	PH560_18877-RA	20	o
PH560_18896	PH560_18896-RE	17	o
PH560_18896	PH560_18896-RF	16	o
PH560_18898	PH560_18898-RA	21	i7-26o41-58i
PH560_18937	PH560_18937-RH	20	o
PH560_18941	PH560_18941-RA	20	i169-191o
PH560_18941	PH560_18941-RB	20	o
PH560_18943	PH560_18943-RA	23	o
PH560_18943	PH560_18943-RB	23	o
PH560_18965	PH560_18965-RA	21	o132-154i
PH560_18965	PH560_18965-RB	21	o
[truncated: 613 more rows]

## Sheet: S4. Variants in SP genes
Contig	Position	Gene	Reference	Alternative	Ph560	Ph584	Ph608	Ph612	Ph626	Annotation of Mylti-copy gene
					0 is the reference genotype, 1 represents alternative, and "." indicates no genotype is called	0 is the reference genotype, 1 represents alternative, and "." indicates no genotype is called	0 is the reference genotype, 1 represents alternative, and "." indicates no genotype is called	0 is the reference genotype, 1 represents alternative, and "." indicates no genotype is called	0 is the reference genotype, 1 represents alternative, and "." indicates no genotype is called
utg1	282335	PH560_12137	A	G	0/1	0/1	0/1	0/1	0/1
utg1	282423	PH560_12137	C	G	0/1	0/1	0/1	0/1	0/1
utg1	282424	PH560_12137	C	G	0/1	0/1	0/1	0/1	0/1
utg1	282441	PH560_12137	G	A	0/1	0/1	0/1	0/1	0/1
utg1	282468	PH560_12137	G	C	0/1	0/1	0/1	0/0	0/1
utg1	282479	PH560_12137	C	A	0/1	0/0	0/0	0/0	0/1
utg1	282661	PH560_12137	C	T	0/0	0/1	0/0	0/0	0/0
utg1	282862	PH560_12137	A	C	0/1	0/1	0/1	0/0	0/1
utg1	283230	PH560_12137	A	G	0/1	0/1	0/1	0/1	0/1
utg5	59248	PH560_15356	A	G	0/1	0/1	0/1	0/1	0/1
utg5	59326	PH560_15356	C	T	0/1	0/1	0/1	0/1	0/1
utg6	85442	PH560_04627	T	C	0/1	0/1	0/0	0/0	0/1
utg6	85448	PH560_04627	C	A	0/1	0/1	0/0	0/0	0/1
utg6	282026	PH560_04651	TG	T	0/0	0/0	0/0	0/1	0/0
utg6	437134	PH560_04667	T	G	0/0	0/0	0/0	0/1	0/0
utg9	586056	PH560_06709	A	C	0/0	0/0	0/0	0/1	0/0
utg9	589865	PH560_06709	A	C	0/0	0/0	0/0	0/1	0/0
utg9	589868	PH560_06709	T	C	0/0	0/0	0/0	0/1	0/0
utg9	610197	PH560_06713	GGGGT	G	0/1	0/1	0/1	0/1	0/1
utg9	610201	PH560_06713	T	TACC	0/1	0/1	0/1	0/1	0/1
utg9	611185	PH560_06713	C	T	0/0	0/1	0/1	0/1	0/1
utg9	611198	PH560_06713	T	C	0/0	0/1	0/1	0/1	0/1
utg13	379099	PH560_01180	T	G	0/0	0/0	0/0	0/1	0/0
utg13	634695	PH560_01219	T	G	0/0	0/0	0/0	0/1	0/0
utg13	730677	PH560_01235	T	G	0/0	0/1	0/1	0/1	0/1
utg13	730699	PH560_01235	C	T	0/0	0/1	0/1	0/1	0/0
utg13	730706	PH560_01235	C	T	0/0	0/1	0/1	0/1	0/0
utg13	730734	PH560_01235	G	T	0/0	0/1	0/1	0/1	0/1
utg13	1060830	PH560_01274	T	G	0/1	0/1	0/1	0/1	0/1
utg13	1060909	PH560_01274	A	G	0/1	0/1	0/1	0/1	0/1
utg13	1060926	PH560_01274	A	G	0/1	0/1	0/1	0/1	0/1
utg13	1061270	PH560_01274	T	C	0/1	0/1	0/1	0/1	0/1
utg13	1061387	PH560_01274	T	C	0/1	0/1	0/1	0/1	0/1
utg13	1061579	PH560_01274	A	G	0/1	0/1	0/1	0/1	0/1
utg13	1061685	PH560_01274	G	A	0/0	0/1	0/1	0/0	0/1
utg13	1061724	PH560_01274	A	G	0/1	0/1	0/1	0/1	0/1
utg13	1061956	PH560_01274	C	T	0/1	0/1	0/1	0/1	0/1
utg13	1061970	PH560_01274	A	G	0/1	0/1	0/1	0/1	0/1
utg13	1062103	PH560_01274	G	A	0/1	0/1	0/1	0/1	0/1
utg17	21554	PH560_04515	G	A	0/1	0/1	0/1	0/1	0/1
utg17	21609	PH560_04515	G	A	0/1	0/1	0/1	0/1	0/1
utg17	21658	PH560_04515	C	T	0/1	0/1	0/1	0/1	0/1
utg17	21697	PH560_04515	G	C	0/1	0/1	0/1	0/1	0/1
utg17	21699	PH560_04515	G	A	0/0	0/0	0/0	0/1	0/0
utg17	21716	PH560_04515	A	G	0/1	0/1	0/1	0/1	0/1
utg17	21747	PH560_04515	G	A	0/1	0/1	0/1	0/1	0/1
utg17	21853	PH560_04515	A	G	0/1	0/1	0/1	0/1	0/1
utg17	21907	PH560_04515	C	T	0/1	0/1	0/1	0/1	0/1
utg17	21976	PH560_04515	G	A	0/1	0/1	0/1	0/1	0/1
utg17	21994	PH560_04515	T	C	0/1	0/1	0/1	0/1	0/1
utg17	22039	PH560_04515	G	A	0/1	0/1	0/1	0/1	0/1
utg17	22081	PH560_04515	G	A	0/1	0/1	0/1	0/1	0/1
utg17	22112	PH560_04515	C	T	0/1	0/1	0/1	0/1	0/1
utg17	22123	PH560_04515	G	T	0/1	0/1	0/1	0/1	0/1
utg17	22187	PH560_04515	T	C	0/1	0/1	0/1	0/1	0/1
utg17	22308	PH560_04515	C	T	0/1	0/1	0/1	0/1	0/1
utg17	22372	PH560_04515	C	T	0/1	0/1	0/1	0/1	0/1
utg17	22539	PH560_04515	G	C	0/1	0/1	0/1	0/1	0/1
utg17	22566	PH560_04515	T	C	0/1	0/1	0/1	0/1	0/1
utg17	22570	PH560_04515	C	T	0/1	0/1	0/1	0/1	0/1
utg17	22623	PH560_04515	G	A	0/1	0/1	0/1	0/1	0/0
utg17	22941	PH560_04515	T	C	0/1	0/1	0/1	0/1	0/1
utg17	23679	PH560_04515	T	C	0/1	0/1	0/1	0/1	0/1
utg17	23739	PH560_04515	G	T	0/1	0/1	0/1	0/1	0/1
utg17	23797	PH560_04515	T	G	0/1	0/1	0/1	0/1	0/1
utg17	24110	PH560_04515	G	A	0/1	0/1	0/1	0/1	0/1
utg18	242081	PH560_03730	A	C	0/0	0/0	0/0	0/1	0/0
utg22	103899	PH560_08834	T	C	0/1	0/1	0/1	0/1	0/1
utg22	104280	PH560_08834	T	C	0/1	0/1	0/1	0/1	0/1
utg22	104284	PH560_08834	TGG	T,TG	0/2	1/2	0/2	1/2	1/2
utg22	106220	PH560_08834	C	T	0/1	0/1	0/1	0/1	0/1
utg22	106464	PH560_08834	T	C	0/0	0/1	0/1	0/1	0/1
utg22	107476	PH560_08834	C	T	0/0	0/1	0/1	0/1	0/1
utg22	107895	PH560_08834	T	G	0/0	0/0	0/0	0/1	0/0
utg23	323834	PH560_11801	C	A	0/1	0/1	0/1	0/0	0/0
utg23	323863	PH560_11801	A	C	0/1	0/1	0/0	0/0	0/0
utg23	323874	PH560_11801	G	T	0/1	0/1	0/0	0/1	0/1
utg23	323927	PH560_11801	G	A	0/1	0/1	0/1	0/1	0/1
utg23	323951	PH560_11801	C	T	0/1	0/1	0/1	0/1	0/1
utg23	323953	PH560_11801	G	A	0/1	0/1	0/1	0/1	0/1
utg23	323979	PH560_11801	G	T	0/1	0/1	0/1	0/1	0/1
utg23	324010	PH560_11801	T	C	0/1	0/1	0/1	0/1	0/1
utg23	324021	PH560_11801	C	T	0/1	0/1	0/1	0/1	0/1
utg27	273047	PH560_02249	C	T	0/0	0/0	0/0	0/0	0/1
utg27	487650	PH560_02276	C	G	0/1	0/1	0/1	0/1	0/1
utg27	488138	PH560_02276	A	G	0/1	0/1	0/1	0/1	0/1
utg27	488222	PH560_02276	T	G	0/1	0/1	0/1	0/1	0/1
utg27	488351	PH560_02276	C	G	0/1	0/1	0/1	0/1	0/1
utg27	488360	PH560_02276	G	A	0/1	0/1	0/1	0/1	0/1
utg27	488429	PH560_02276	G	A	0/1	0/1	0/1	0/1	0/1
utg27	488546	PH560_02276	T	G	0/1	0/1	0/1	0/1	0/1
utg27	488595	PH560_02276	C	T	0/1	0/1	0/1	0/1	0/1
utg27	488596	PH560_02276	A	G	0/1	0/1	0/1	0/1	0/1
utg27	488831	PH560_02276	C	T	0/1	0/1	0/1	0/1	0/1
utg27	488997	PH560_02276	C	T	0/1	0/1	0/1	0/1	0/1
utg27	489150	PH560_02276	C	A	0/1	0/1	0/1	0/1	0/1
utg27	489274	PH560_02276	C	T	0/1	0/1	0/1	0/1	0/1
utg27	489310	PH560_02276	T	C	0/1	0/1	0/1	0/1	0/1
utg27	489330	PH560_02276	G	A	0/1	0/1	0/1	0/1	0/1
utg27	489334	PH560_02276	C	T	0/1	0/1	0/1	0/1	0/1
utg27	489560	PH560_02276	C	T	0/0	0/1	0/1	0/1	0/1
utg27	489577	PH560_02276	A	G	0/0	0/1	0/1	0/1	0/1
utg27	489618	PH560_02276	C	T	0/0	0/1	0/1	0/1	0/1
utg27	489628	PH560_02276	T	C	0/0	0/1	0/1	0/1	0/1
utg27	489634	PH560_02276	G	C	0/0	0/1	0/1	0/1	0/1
utg27	489635	PH560_02276	G	A	0/0	0/1	0/1	0/1	0/1
utg29	65764	PH560_04294	T	G	0/0	0/0	0/0	0/1	0/0
utg32	310673	PH560_11958	A	C	0/0	0/0	0/0	0/1	0/0
utg32	351667	PH560_11963	A	C	0/0	0/0	0/0	0/1	0/0
utg36	93961	PH560_10783	CA	C	1/1	1/1	1/1	1/1	1/1
utg36	94045	PH560_10783	G	GT	1/1	1/1	1/1	1/1	1/1
utg36	95091	PH560_10783	T	A	0/0	0/0	0/1	0/0	0/0
utg36	95109	PH560_10783	G	A	0/0	0/0	0/1	0/0	0/0
utg36	95139	PH560_10783	C	T	0/1	0/0	0/0	0/0	0/0
utg36	95175	PH560_10783	T	C	0/0	0/1	0/1	0/1	0/0
utg36	95455	PH560_10783	C	A	0/1	0/1	0/1	0/0	0/1
utg36	95619	PH560_10783	G	T	0/1	0/1	0/1	0/1	0/1
utg36	95625	PH560_10783	A	G	0/1	0/1	0/1	0/1	0/1
utg36	95742	PH560_10783	C	G	0/1	0/1	0/1	0/1	0/1
utg36	95888	PH560_10783	T	C	0/1	0/1	0/1	0/1	0/1
utg36	95920	PH560_10783	GATC	G	0/1	0/1	0/1	0/1	0/1
utg36	95973	PH560_10783	A	C	0/1	0/1	0/1	0/1	0/1
utg36	96174	PH560_10783	A	T	0/1	0/1	0/1	0/1	0/1
utg36	96180	PH560_10783	A	G	0/1	0/1	0/1	0/1	0/1
utg38	101760	PH560_02499	G	C	0/1	0/1	0/1	0/1	0/1
utg38	101762	PH560_02499	A	C	0/1	0/1	0/1	0/1	0/1
utg38	101775	PH560_02499	G	A	0/1	0/1	0/1	0/1	0/1
utg38	101787	PH560_02499	C	G	0/1	0/1	0/1	0/1	0/1
utg38	102027	PH560_02499	G	A	0/1	0/1	0/1	0/1	0/1
utg38	102031	PH560_02499	C	G	0/1	0/1	0/1	0/1	0/1
utg38	102036	PH560_02499	G	A	0/1	0/1	0/1	0/1	0/1
utg38	102078	PH560_02499	T	A	0/1	0/1	0/1	0/1	0/1
utg38	102126	PH560_02499	A	G	0/1	0/1	0/1	0/1	0/1
utg38	102127	PH560_02499	G	A	0/1	0/1	0/1	0/1	0/1
utg38	102176	PH560_02499	C	G	0/1	0/1	0/1	0/1	0/1
utg38	801340	PH560_02580	A	G	0/0	0/0	0/0	0/1	0/0
utg43	88054	PH560_03344	T	G	0/0	0/0	0/0	0/1	0/0
utg43	89476	PH560_03345	T	G	0/0	0/0	0/0	0/1	0/0
utg43	609963	PH560_03395	C	T	0/1	0/1	0/1	0/1	0/1
utg43	610143	PH560_03395	C	T	0/1	0/1	0/1	0/1	0/1
utg48	357882	PH560_13916	C	T	0/1	0/1	0/1	0/1	0/1
utg48	358697	PH560_13916	G	GT	1/1	1/1	1/1	1/1	1/1
utg49	119161	PH560_13784	C	A	0/0	0/0	0/0	0/1	0/0
utg50	43609	PH560_16197	G	C	0/1	0/1	0/1	0/1	0/1
utg50	45581	PH560_16197	A	C	0/1	0/1	0/1	0/1	0/1
utg50	45617	PH560_16197	TGA	T	0/1	0/1	0/1	0/1	0/1
utg51	336796	PH560_08640	C	A	0/1	0/1	0/1	0/1	0/1
utg51	341034	PH560_08643	G	GTT	0/1	0/0	0/0	0/0	0/1
utg51	341519	PH560_08643	C	A	0/1	0/1	0/1	0/1	0/1
utg51	341922	PH560_08643	G	A	0/0	0/0	0/0	0/0	0/1
utg58	349291	PH560_09067	G	A	0/1	0/1	0/1	0/1	0/1
utg58	349336	PH560_09067	C	T	0/1	0/1	0/1	0/1	0/1
utg58	349397	PH560_09067	G	A	0/1	0/1	0/1	0/1	0/1
utg58	349459	PH560_09067	C	T	0/0	0/0	0/0	0/0	0/1
utg58	417102	PH560_09080	A	C	0/0	0/0	0/0	0/1	0/0
utg58	418028	PH560_09080	T	C	0/0	0/0	0/0	0/1	0/0
utg58	537717	PH560_09094	A	C	0/0	0/0	0/0	0/1	0/0
utg58	538413	PH560_09094	C	T	0/0	0/0	0/0	0/0	0/1
utg59	499789	PH560_01978	T	C	0/1	0/1	0/1	0/1	0/1
utg59	499812	PH560_01978	C	A	0/1	0/1	0/1	0/1	0/1
utg59	499836	PH560_01978	A	G	0/1	0/1	0/1	0/1	0/1
utg59	499837	PH560_01978	G	A	0/1	0/1	0/1	0/1	0/1
utg59	500056	PH560_01978	C	T	0/1	0/1	0/1	0/1	0/1
utg59	500059	PH560_01978	T	A	0/1	0/1	0/1	0/1	0/1
utg59	500091	PH560_01978	G	A	0/1	0/1	0/1	0/1	0/1
utg59	500111	PH560_01978	T	C	0/1	0/1	0/1	0/1	0/1
utg59	500112	PH560_01978	G	A	0/1	0/1	0/1	0/1	0/1
utg59	500145	PH560_01978	C	T	0/1	0/1	0/1	0/1	0/1
utg59	500150	PH560_01978	G	A	0/1	0/1	0/1	0/1	0/1
utg59	500156	PH560_01978	A	T	0/1	0/1	0/1	0/1	0/1
utg59	500157	PH560_01978	C	T	0/1	0/1	0/1	0/1	0/1
utg59	500192	PH560_01978	T	C	0/1	0/1	0/1	0/1	0/1
utg59	500199	PH560_01978	T	C	0/1	0/1	0/1	0/1	0/1
utg59	500205	PH560_01978	G	T	0/1	0/1	0/1	0/1	0/1
utg59	500221	PH560_01978	T	C	0/1	0/1	0/1	0/1	0/1
utg59	500505	PH560_01978	A	G	0/1	0/1	0/1	0/1	0/1
utg59	500810	PH560_01978	T	C	0/1	0/1	0/1	0/1	0/1
utg59	642257	PH560_01996	A	C	0/0	0/0	0/0	0/1	0/0
utg59	642992	PH560_01996	GAAA	G	0/1	0/1	0/1	0/1	0/1
utg59	643016	PH560_01996	AGGC	A	0/1	0/1	0/1	0/1	0/1
utg59	643021	PH560_01996	T	A	0/1	0/1	0/1	0/1	0/1
utg59	1010936	PH560_02050	A	C	0/0	0/0	0/0	0/1	0/0
utg60	389705	PH560_13364	A	C	0/0	0/0	0/0	0/1	0/0
utg60	390396	PH560_13364	A	C	0/0	0/0	0/0	0/1	0/0
utg60	390399	PH560_13364	A	C	0/0	0/0	0/0	0/1	0/0
utg60	390403	PH560_13364	A	C	0/0	0/0	0/0	0/1	0/0
utg62	207161	PH560_00299	A	AG	1/1	1/1	1/1	1/1	1/1
utg62	792952	PH560_00363	T	G	0/0	0/0	0/0	0/1	0/0
utg62	793237	PH560_00363	T	G	0/1	0/0	0/0	0/1	0/0
utg62	911214	PH560_00379	A	G	0/1	0/1	0/1	0/1	0/1
utg62	911220	PH560_00379	C	A	0/1	0/1	0/1	0/1	0/1
utg62	911233	PH560_00379	T	C	0/1	0/1	0/1	0/1	0/1
utg62	911246	PH560_00379	T	C	0/1	0/1	0/1	0/1	0/1
utg62	911765	PH560_00379	C	A	0/1	0/1	0/1	0/1	0/1
utg71	257561	PH560_05353	T	G	0/0	0/0	0/0	0/1	0/0
utg71	259497	PH560_05353	T	G	0/0	0/0	0/0	0/1	0/0
utg74	20873	PH560_15552	C	T	0/1	0/0	0/0	0/0	0/0
utg74	21628	PH560_15552	A	C	0/1	0/1	0/1	0/1	0/1
utg74	21944	PH560_15552	T	C	0/1	0/1	0/1	0/1	0/1
utg74	205531	PH560_15571	T	G	0/0	0/0	0/0	0/1	0/0
utg74	206062	PH560_15571	G	A	0/1	0/1	0/1	0/1	0/1
utg74	206083	PH560_15571	AC	A	0/1	0/1	0/1	0/1	0/1
utg74	206085	PH560_15571	GAGGAC	G	0/1	0/1	0/1	0/1	0/1
utg74	206147	PH560_15571	G	A	0/1	0/1	0/1	0/1	0/1
utg74	206180	PH560_15571	T	G	0/0	0/0	0/0	0/1	0/0
utg81	90107	PH560_20678	T	G	0/1	0/1	0/1	0/1	0/1
utg81	128775	PH560_20682	A	C	0/0	0/0	0/0	0/1	0/0
utg81	128783	PH560_20682	A	C	0/1	0/1	0/1	0/1	0/1
utg83	47943	PH560_00946	A	C	0/0	0/0	0/0	0/1	0/0
utg83	451446	PH560_01000	T	G	0/0	0/0	0/0	0/1	0/0
utg83	838549	PH560_01053	A	G	0/1	0/1	0/1	0/1	0/1
utg83	838792	PH560_01053	C	T	0/1	0/1	0/1	0/1	0/1
utg83	838795	PH560_01053	A	G	0/1	0/1	0/1	0/1	0/1
utg83	838816	PH560_01053	A	G	0/1	0/1	0/1	0/1	0/1
utg83	839234	PH560_01053	G	T	0/0	0/1	0/0	0/0	0/0
utg83	839806	PH560_01053	A	T	0/1	0/1	0/1	0/1	0/1
utg83	839897	PH560_01053	C	T	0/1	0/1	0/1	0/1	0/1
utg83	840004	PH560_01053	G	A	0/1	0/1	0/1	0/1	0/1
utg83	840358	PH560_01053	A	G	0/1	0/1	0/1	0/1	0/1
utg83	840447	PH560_01053	C	T	0/0	0/0	0/0	0/1	0/0
utg83	1035047	PH560_01077	C	T	0/0	0/0	0/1	0/0	0/0
utg83	1035849	PH560_01077	A	C	0/0	0/0	0/0	0/1	0/0
utg83	1234483	PH560_01101	T	C	0/1	0/1	0/1	0/1	0/1
utg83	1234502	PH560_01101	C	T	0/1	0/1	0/1	0/1	0/1
utg83	1234558	PH560_01101	C	A	0/1	0/1	0/1	0/1	0/1
utg83	1234636	PH560_01101	C	T	0/1	0/1	0/1	0/1	0/1
utg83	1234852	PH560_01101	C	T	0/1	0/1	0/1	0/1	0/1
utg83	1234910	PH560_01101	A	G	0/1	0/1	0/1	0/1	0/1
utg83	1235119	PH560_01101	C	T	0/1	0/1	0/1	0/1	0/1
utg83	1235479	PH560_01101	T	C	0/1	0/1	0/1	0/1	0/1
utg83	1235480	PH560_01101	G	A	0/1	0/1	0/1	0/1	0/1
utg83	1235518	PH560_01101	A	G	0/1	0/1	0/1	0/1	0/1
utg83	1235924	PH560_01101	T	C	0/1	0/1	0/0	0/1	0/1
utg83	1236202	PH560_01101	C	T	0/1	0/1	0/1	0/1	0/1
utg83	1328818	PH560_01116	G	C	0/0	0/0	0/0	0/1	0/0
utg83	1328819	PH560_01116	A	C	0/0	0/0	0/0	0/1	0/0
utg84	252669	PH560_03473	C	A	0/1	0/1	0/1	0/1	0/1
utg84	252924	PH560_03473	G	C	0/1	0/1	0/1	0/1	0/1
utg84	494866	PH560_03497	C	G	0/1	0/1	0/1	0/1	0/1
utg84	494868	PH560_03497	G	T	0/1	0/1	0/1	0/1	0/1
utg84	494886	PH560_03497	T	C	0/1	0/1	0/1	0/1	0/1
utg84	494887	PH560_03497	G	T	0/1	0/1	0/1	0/1	0/1
utg84	494898	PH560_03497	A	G	0/1	0/1	0/1	0/1	0/1
utg84	494899	PH560_03497	A	G	0/1	0/1	0/1	0/1	0/1
utg84	495003	PH560_03497	C	G	0/1	0/1	0/1	0/1	0/1
utg84	495012	PH560_03497	T	C	0/1	0/1	0/1	0/1	0/1
utg84	495018	PH560_03497	G	T	0/1	0/1	0/1	0/1	0/1
utg84	495020	PH560_03497	C	A	0/1	0/1	0/1	0/1	0/1
utg84	495037	PH560_03497	G	A	0/1	0/1	0/1	0/1	0/1
utg84	495042	PH560_03497	C	T	0/1	0/1	0/1	0/1	0/1
utg84	495048	PH560_03497	T	C	0/1	0/1	0/1	0/1	0/1
utg84	495049	PH560_03497	G	T	0/1	0/1	0/1	0/1	0/1
utg84	495051	PH560_03497	C	A	0/1	0/1	0/1	0/1	0/1
utg84	495054	PH560_03497	G	A	0/1	0/1	0/1	0/1	0/1
utg84	495061	PH560_03497	C	A	0/1	0/1	0/1	0/1	0/1
utg84	495066	PH560_03497	C	T	0/1	0/1	0/1	0/1	0/1
utg84	495078	PH560_03497	C	T	0/1	0/1	0/1	0/1	0/1
utg84	495093	PH560_03497	G	A	0/1	0/1	0/1	0/1	0/1
utg84	495096	PH560_03497	T	C	0/1	0/1	0/1	0/1	0/1
utg84	495097	PH560_03497	G	T	0/1	0/1	0/1	0/1	0/1
utg84	495099	PH560_03497	T	C	0/1	0/1	0/1	0/1	0/1
utg84	495113	PH560_03497	G	A	0/1	0/1	0/1	0/1	0/1
utg84	495117	PH560_03497	T	G	0/1	0/1	0/1	0/1	0/1
utg84	495124	PH560_03497	G	T	0/1	0/1	0/1	0/1	0/1
utg84	495141	PH560_03497	G	T	0/1	0/1	0/1	0/1	0/1
utg84	495153	PH560_03497	C	T	0/1	0/1	0/1	0/1	0/1
utg84	495156	PH560_03497	A	G	0/1	0/1	0/1	0/1	0/1
utg84	495212	PH560_03497	G	A	0/1	0/1	0/1	0/1	0/1
utg84	495216	PH560_03497	C	A	0/1	0/1	0/1	0/1	0/1
utg84	495220	PH560_03497	G	A	0/1	0/1	0/1	0/1	0/1
utg84	495222	PH560_03497	T	A	0/1	0/1	0/1	0/1	0/1
utg84	495225	PH560_03497	A	G	0/1	0/1	0/1	0/1	0/1
utg84	495255	PH560_03497	C	T	0/1	0/1	0/1	0/1	0/1
utg84	495258	PH560_03497	T	C	0/1	0/1	0/1	0/1	0/1
utg84	495259	PH560_03497	G	A	0/1	0/1	0/1	0/1	0/1
utg84	495264	PH560_03497	A	G	0/1	0/1	0/1	0/1	0/1
utg84	495268	PH560_03497	A	G	0/1	0/1	0/1	0/1	0/1
utg84	495280	PH560_03497	C	T	0/1	0/1	0/1	0/1	0/1
utg84	495297	PH560_03497	G	T	0/0	0/0	0/0	0/1	0/0
utg84	495469	PH560_03497	C	T	0/1	0/1	0/1	0/1	0/1
utg84	495483	PH560_03497	A	C	0/1	0/1	0/1	0/1	0/1
utg84	495488	PH560_03497	C	T	0/1	0/1	0/1	0/1	0/1
utg84	495507	PH560_03497	A	C	0/1	0/1	0/1	0/1	0/1
utg84	495522	PH560_03497	G	A	0/1	0/1	0/1	0/1	0/1
utg84	495537	PH560_03497	C	T	0/1	0/1	0/1	0/1	0/1
utg84	495538	PH560_03497	A	G	0/1	0/1	0/1	0/1	0/1
utg84	495545	PH560_03497	C	T	0/1	0/1	0/1	0/1	0/1
utg84	495546	PH560_03497	T	G	0/1	0/1	0/1	0/1	0/1
utg84	495558	PH560_03497	A	G	0/1	0/1	0/1	0/1	0/1
utg84	859812	PH560_03544	A	C	0/0	0/0	0/0	0/1	0/0
utg84	903410	PH560_03549	A	C	0/0	0/0	0/0	0/1	0/0
utg85	85900	PH560_09462	T	G	0/1	0/1	0/1	0/1	0/1
utg85	85904	PH560_09462	C	T	0/1	0/1	0/1	0/1	0/1
utg85	85966	PH560_09462	T	C	0/1	0/1	0/1	0/1	0/1
utg85	85980	PH560_09462	C	A	0/1	0/1	0/1	0/1	0/1
utg85	86018	PH560_09462	G	T	0/1	0/1	0/1	0/1	0/1
utg85	86059	PH560_09462	C	T	0/1	0/1	0/1	0/1	0/1
utg85	86306	PH560_09462	G	T	0/1	0/1	0/1	0/1	0/1
utg85	320885	PH560_09498	T	G	0/0	0/0	0/0	0/1	0/0
utg86	318979	PH560_03226	T	G	0/0	0/0	0/0	0/1	0/0
utg86	667413	PH560_03273	GAAA	G,GAAAAA	1/2	1/2	1/2	1/2	1/2
utg86	755373	PH560_03284	T	C	0/0	0/0	0/1	0/1	0/0
utg86	784573	PH560_03293	C	T	0/1	0/1	0/1	0/1	0/1
utg86	784591	PH560_03293	G	T	0/1	0/1	0/1	0/1	0/1
utg86	784592	PH560_03293	C	T	0/1	0/1	0/1	0/1	0/1
utg86	784826	PH560_03293	C	T	0/1	0/1	0/0	0/0	0/0
utg90	381862	PH560_05406	A	C	0/0	0/0	0/0	0/1	0/0
utg91	46680	PH560_17217	A	G	0/1	0/1	0/1	0/1	0/1
utg91	46811	PH560_17217	G	T	0/1	0/1	0/1	0/1	0/1
utg91	46836	PH560_17217	C	T	0/1	0/1	0/1	0/1	0/1
utg91	263744	PH560_17253	G	A	0/0	0/0	1/1	0/1	0/0
utg97	162047	PH560_01629	AT	A	0/1	0/1	0/1	0/1	0/1
utg97	622586	PH560_01697	A	G	0/0	0/0	0/0	0/1	0/0
utg98	91458	PH560_21868	C	G	0/1	0/1	0/1	0/1	0/1
utg98	91479	PH560_21868	T	C	0/1	0/1	0/1	0/1	0/1
utg98	91789	PH560_21868	T	G	0/0	0/0	0/0	0/1	0/0
utg98	103638	PH560_21870	A	C	0/1	0/1	0/1	0/1	0/1
utg103	257644	PH560_06568	T	G	0/0	0/0	0/0	0/1	0/0
utg103	320222	PH560_06577	A	C	0/0	0/0	0/0	0/1	0/0
utg103	331951	PH560_06578	G	A	0/0	0/0	0/0	0/1	0/0
utg105	81710	PH560_12383	T	C	0/1	0/1	0/0	0/1	0/0
utg105	243728	PH560_12404	C	T	./.	./.	./.	./.	./.	Multip copy genes collapsed in a single locus
utg105	243729	PH560_12404	A	G	./.	./.	./.	./.	./.	Multip copy genes collapsed in a single locus
utg105	243754	PH560_12404	G	A	./.	./.	./.	./.	./.	Multip copy genes collapsed in a single locus
utg105	243797	PH560_12404	A	G	./.	./.	./.	./.	./.	Multip copy genes collapsed in a single locus
utg105	243824	PH560_12404	A	T	./.	./.	./.	./.	./.	Multip copy genes collapsed in a single locus
utg105	243833	PH560_12404	G	T	./.	./.	./.	./.	./.	Multip copy genes collapsed in a single locus
utg105	243847	PH560_12404	A	T	./.	./.	./.	./.	./.	Multip copy genes collapsed in a single locus
utg105	243848	PH560_12404	C	G	./.	./.	./.	./.	./.	Multip copy genes collapsed in a single locus
utg105	243851	PH560_12404	G	T	./.	./.	./.	./.	./.	Multip copy genes collapsed in a single locus
utg105	243868	PH560_12404	ATC	A	./.	./.	./.	./.	./.	Multip copy genes collapsed in a single locus
[truncated: 1,748 more rows]

## Sheet: S5. Candidates for Avr genes
AvrRph13	AvrRph3	AvrRph19
[truncated: 46 more rows]
